# Supplementary material for: Comprehensive analyses of the cancer-associated fibroblast subtypes and their score system for prediction of outcomes and immunosuppressive microenvironment in prostate cancer
Source: PubMed Central journal article supplement (PMC10996219; doi:10.1186/s12935-024-03305-5), 2024-04-05
Supplement: 12935_2024_3305_MOESM1_ESM.pdf [file 12935_2024_3305_MOESM1_ESM.pdf]

**Comprehensive analyses of the cancer-associated fibroblast subtypes and their score system for prediction of outcomes and immunosuppressive microenvironment in prostate cancer**

Ze Gao<sup>1,2#</sup>, Ning Zhang<sup>3#</sup>, Bingzheng An<sup>1</sup>, Dawei Li<sup>1,2</sup>, Zhiqing Fang<sup>1,2\*</sup>, Dawei Xu<sup>4\*</sup>

**Supplementary materials include Figure S1- S6 and Table S1 – S4.**

**Figure S1. Distribution and expression levels of CAF associated genes.**

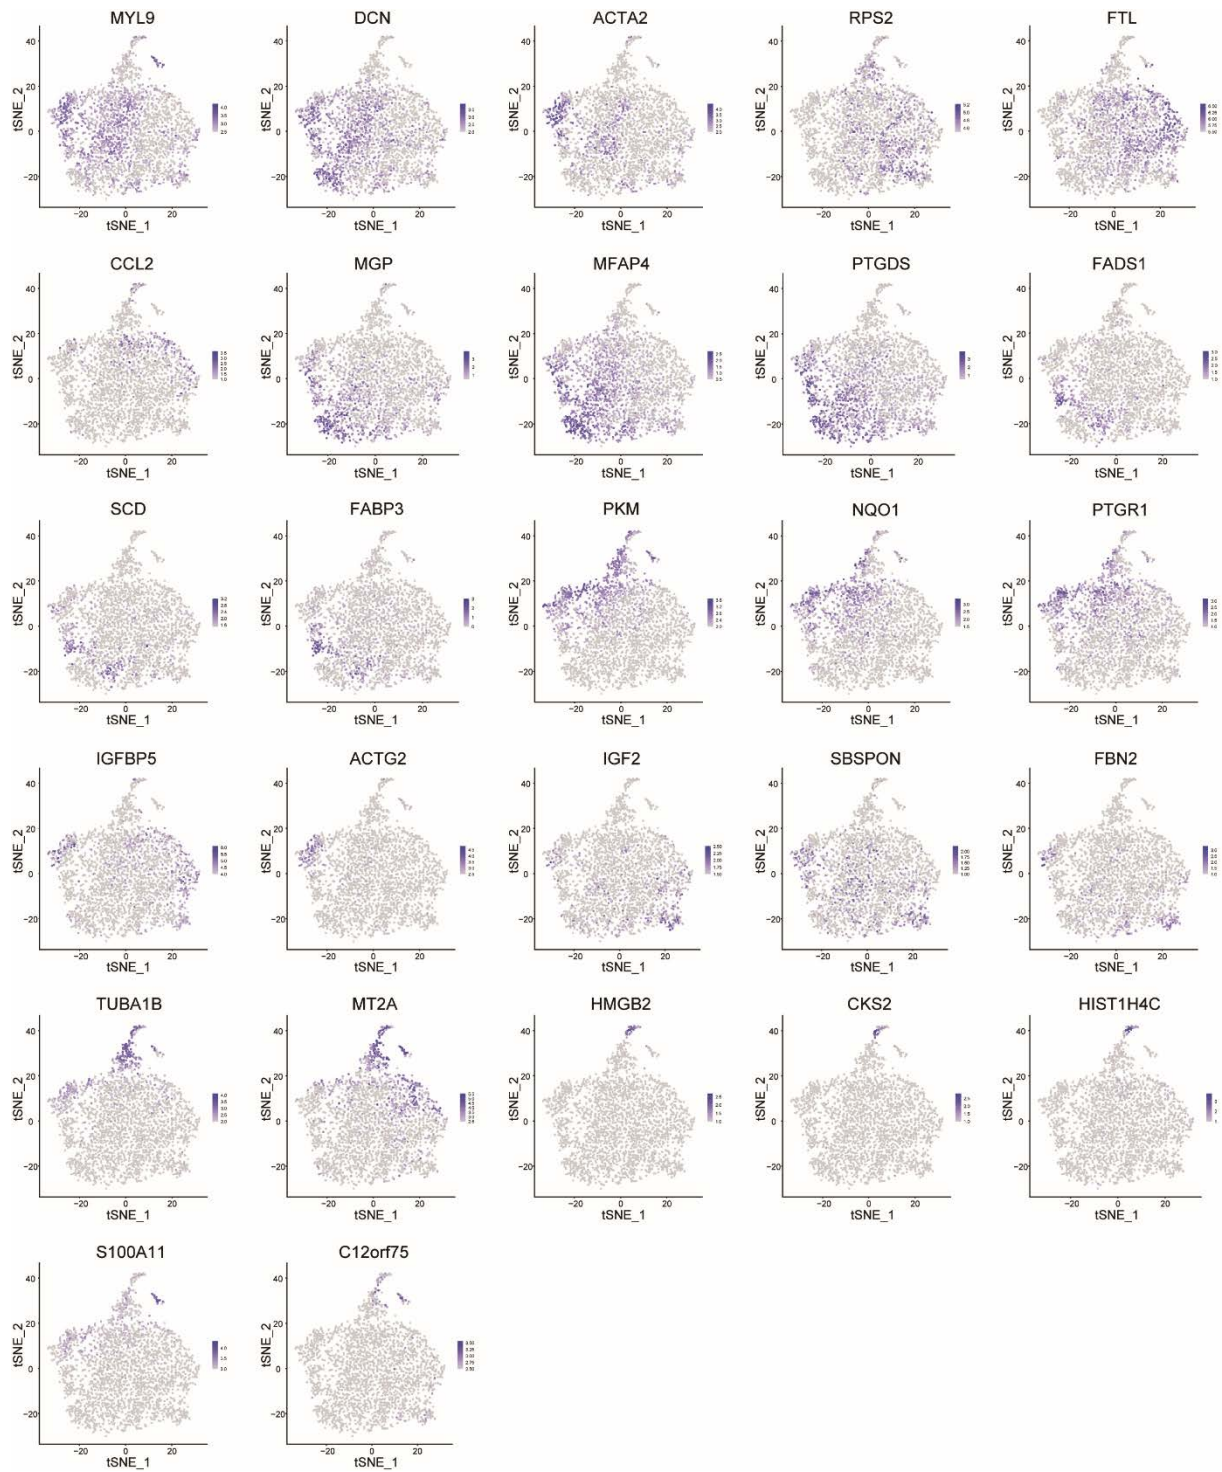

**Figure S2. Establishment of CAF subtype score model.** (A) Univariate Cox regression analysis of CAF associated genes in different subtypes. (B) ROC curves of CAF subtypes score at 3, 5, and 7 years in the TCGA dataset.

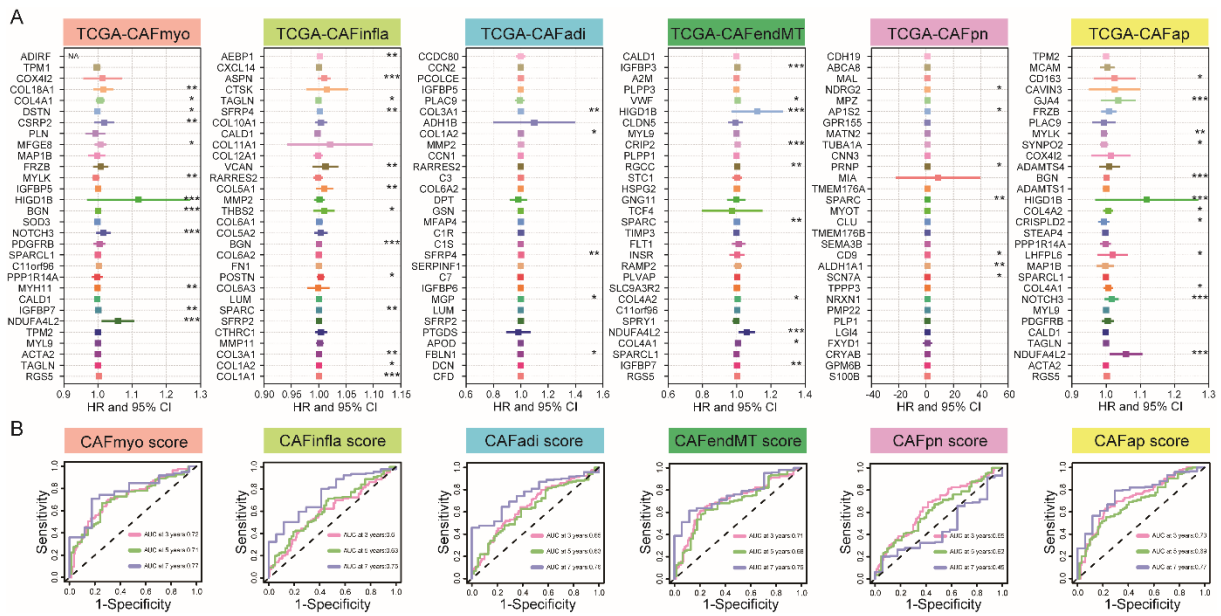

**Figure S3. The interactions between genes.** (A) The Sankey diagram of the relationship between CAF associated genes and CAF subtype. (B) The interaction between CAF associated genes in PCa tumors.

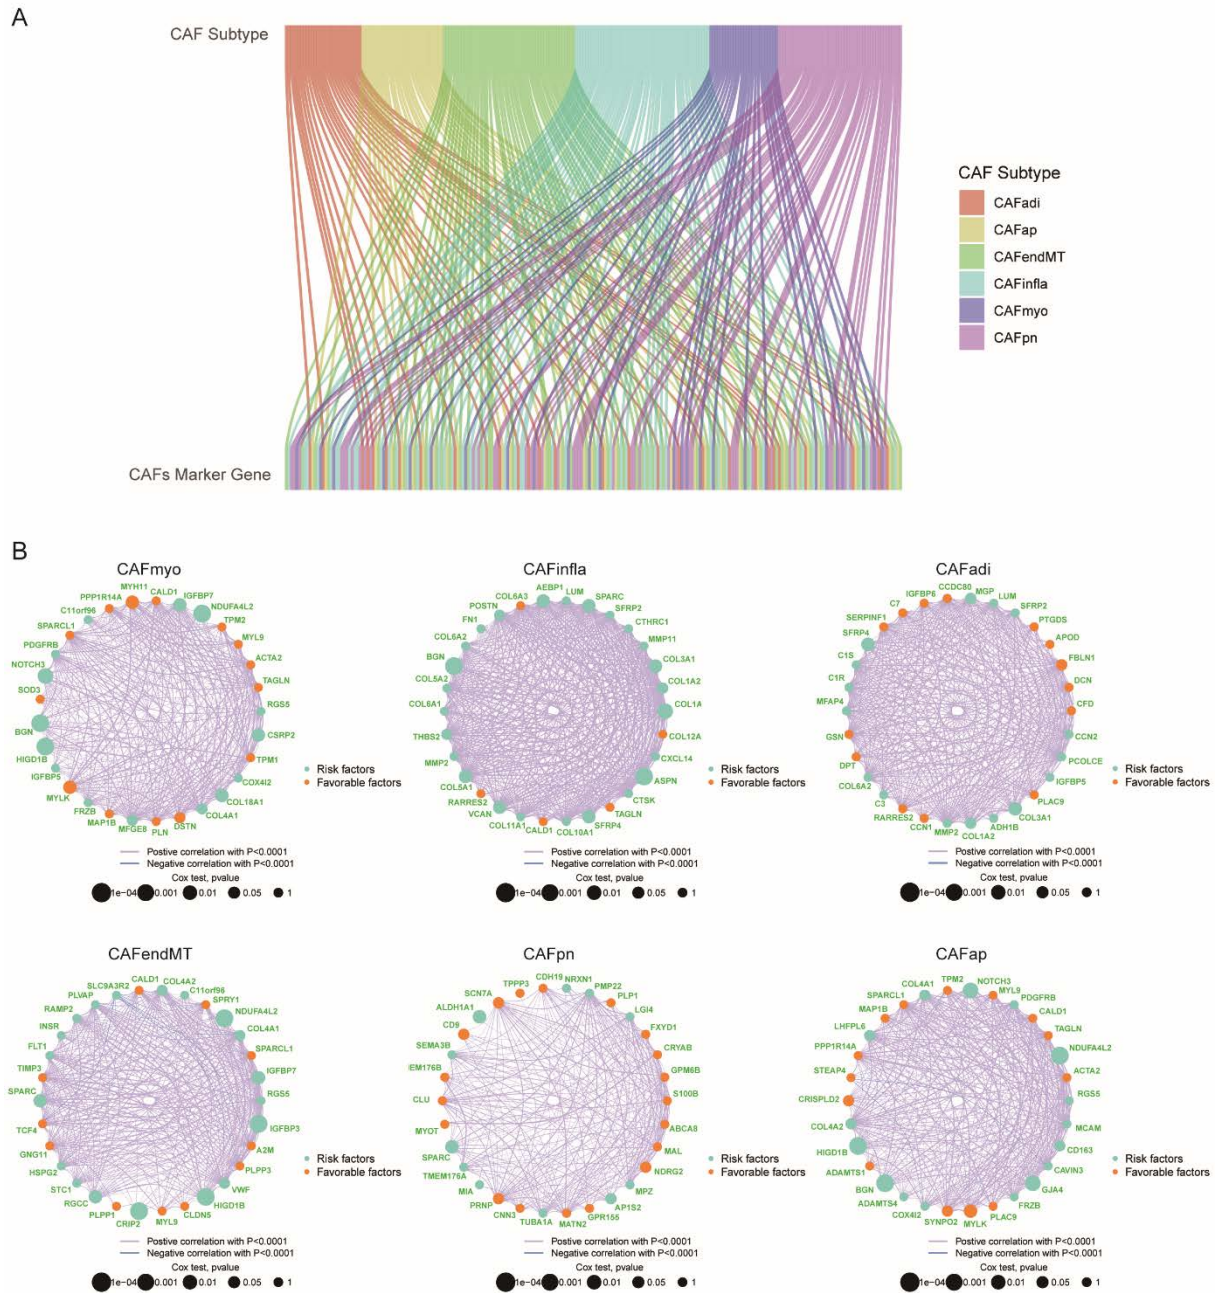



**Figure S4. The box plot of treatment sensitivity of drugs between CAF score low and high groups.**

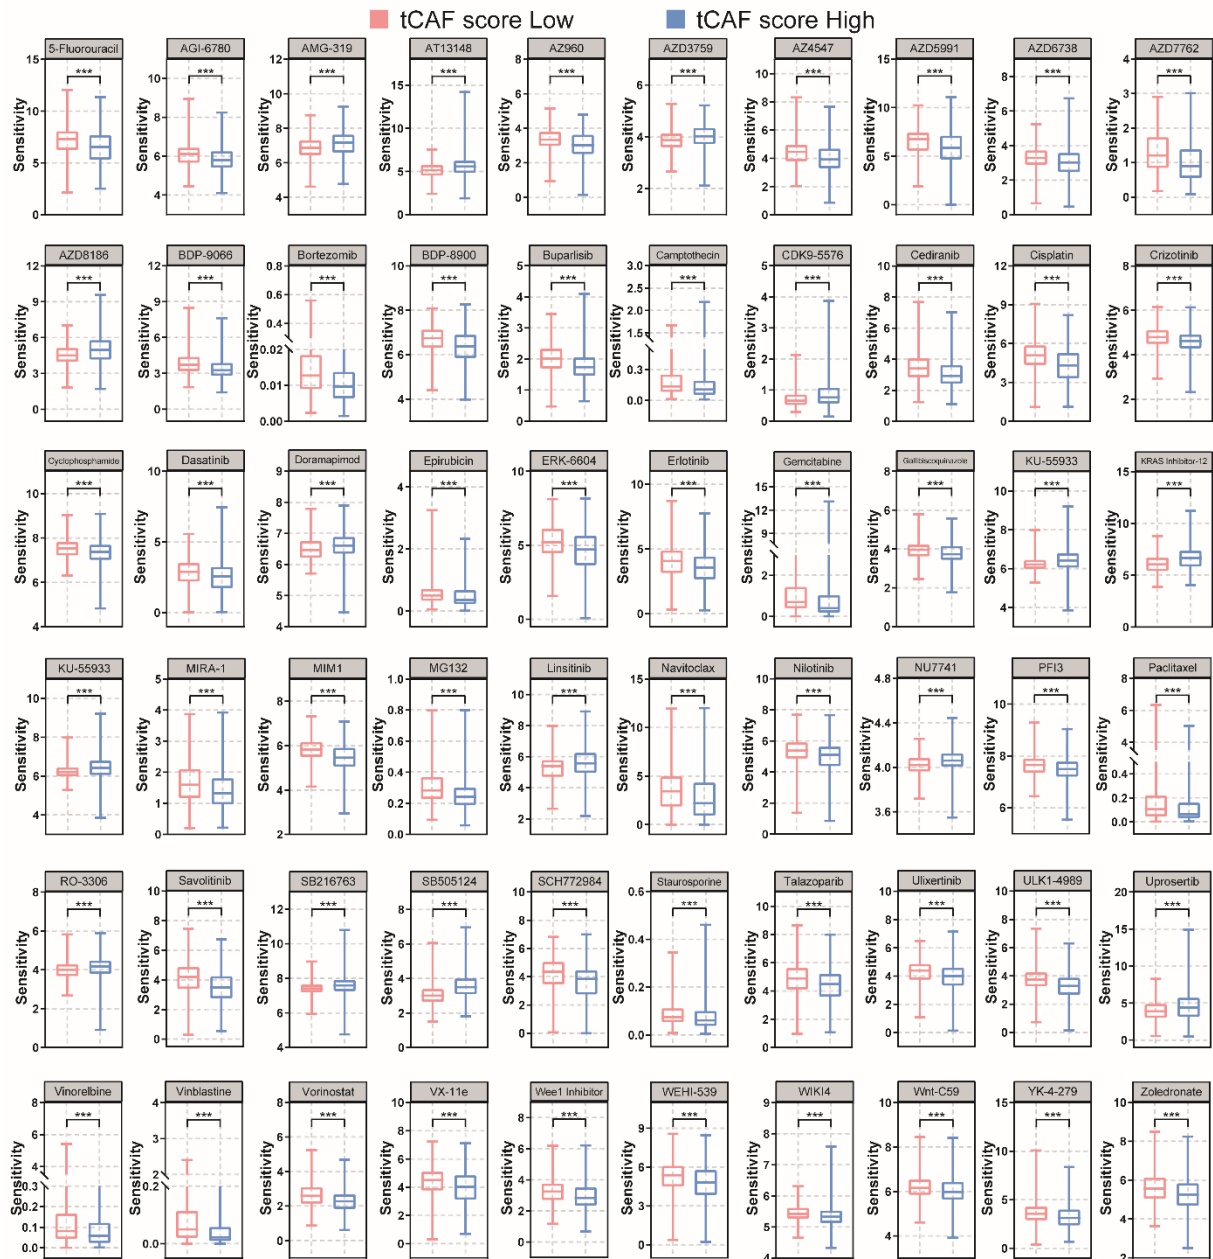



**Figure S6. The GSE70770 PCa cohort analysis of the subtype and total CAF scores as prognostic factors.** (A) Kaplan-Meier analysis was performed in the GSE70770 cohort based on the CAF subtype score-high and low groups (Median value as a cutoff). (B) Kaplan-Meier analysis of the total CAF score low and high groups (Median value as a cutoff). (C) ROC curves of CAF score at 3, 5, and 7 years in the GSE70770 PCa cohort.

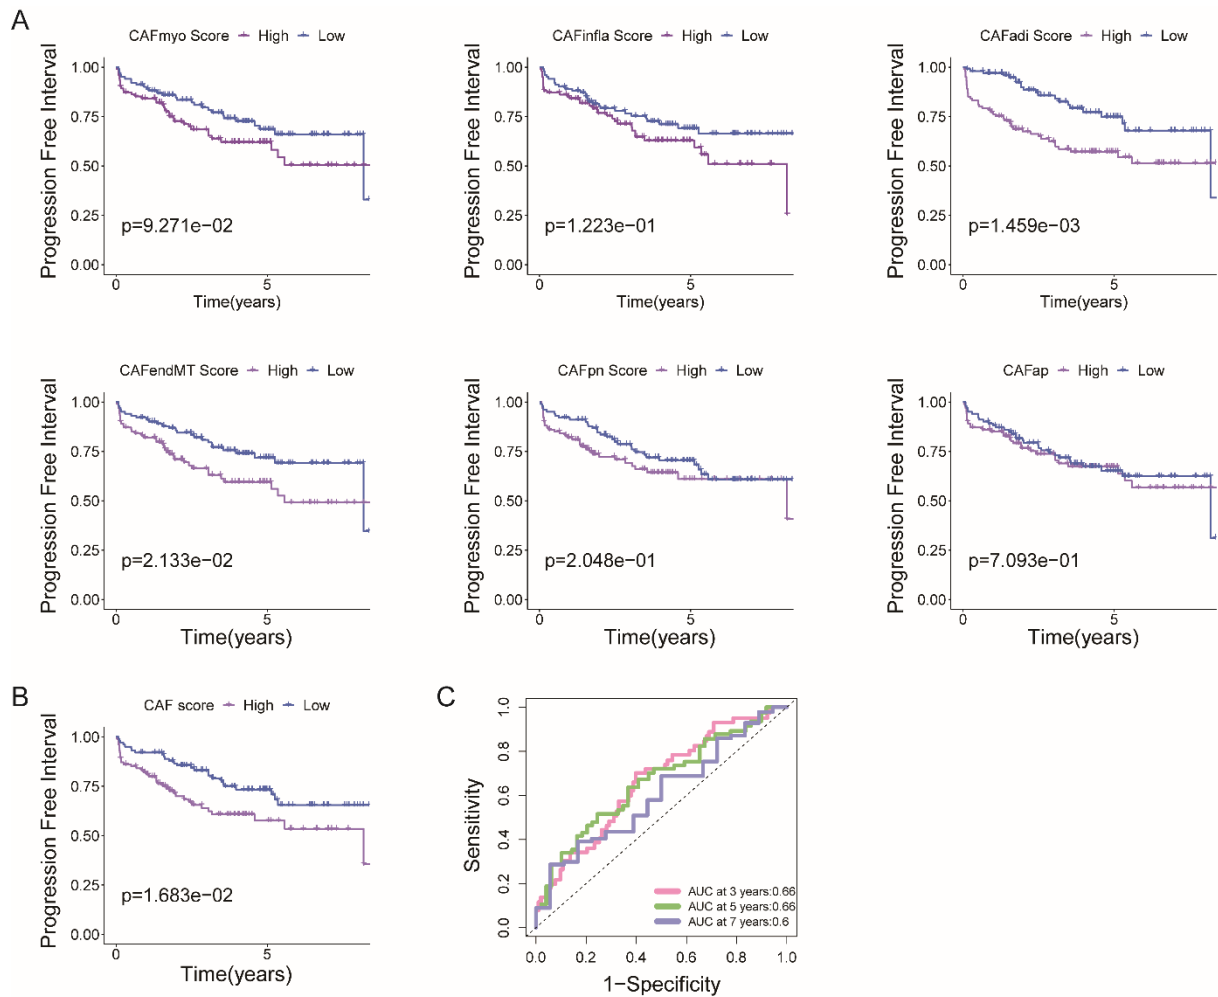

**Table S1. Differentially expressed genes between normal and cancer-associated fibroblasts in the GSE85606 cohort of PCa**

| id         | logFC    | logCPM   | PValue   | FDR      |
|------------|----------|----------|----------|----------|
| GUCY1A1    | 7,885493 | 3,753533 | 5,77E-11 | 1,23E-06 |
| CXADR      | -5,6815  | 2,47182  | 3,83E-08 | 0,000409 |
| DSP        | 6,454763 | 5,158253 | 1,49E-07 | 0,000843 |
| MFAP5      | 5,606379 | 2,256999 | 1,58E-07 | 0,000843 |
| CDH6       | 2,543334 | 8,409941 | 2,13E-07 | 0,000911 |
| GUCY1B1    | 4,086999 | 4,715483 | 3,33E-07 | 0,001183 |
| HOXD8      | 5,488266 | 0,847565 | 5,67E-07 | 0,001729 |
| ATP10A     | 4,370887 | 3,004412 | 1,51E-06 | 0,004025 |
| IP6K3      | -7,40106 | -0,80844 | 2,26E-06 | 0,004882 |
| AC104083.1 | 7,025483 | 1,617654 | 2,29E-06 | 0,004882 |
| EFHD1      | 9,502561 | 1,088124 | 3,52E-06 | 0,006832 |
| TINAGL1    | 5,03803  | 4,305257 | 5,26E-06 | 0,009358 |
| SORBS2     | 5,371859 | 2,053699 | 6,71E-06 | 0,011024 |
| WT1        | 7,371468 | -0,85531 | 7,75E-06 | 0,011817 |
| KCNH1      | 4,482869 | 1,772273 | 1,05E-05 | 0,014983 |
| ALPL       | 2,932214 | 3,858573 | 1,19E-05 | 0,015922 |
| NRXN3      | 5,253206 | 2,656047 | 1,27E-05 | 0,015934 |
| PTHLH      | 3,806804 | 4,196686 | 1,57E-05 | 0,017788 |
| MYO1D      | 2,913677 | 5,238364 | 1,58E-05 | 0,017788 |
| COL4A6     | -2,60147 | 6,275737 | 2,08E-05 | 0,021255 |
| COMP       | 6,647635 | 2,661221 | 2,09E-05 | 0,021255 |
| LMCD1      | 3,884528 | 3,933095 | 2,30E-05 | 0,021386 |
| SCRG1      | 6,423207 | 2,017926 | 2,30E-05 | 0,021386 |
| FAT1       | 1,950638 | 9,602256 | 2,41E-05 | 0,021434 |
| ITGA11     | 3,415483 | 6,427306 | 2,63E-05 | 0,022454 |
| SLC9A7P1   | 3,342623 | 0,332459 | 3,19E-05 | 0,025964 |
| PI16       | 5,688627 | 1,375801 | 3,28E-05 | 0,025964 |
| TBX18      | 2,995038 | 2,139452 | 3,71E-05 | 0,028284 |
| VIT        | 2,661941 | 3,351742 | 4,02E-05 | 0,029578 |
| HOXD-AS2   | 6,385873 | -1,64017 | 4,87E-05 | 0,034674 |
| LRRC32     | 3,431237 | 4,230473 | 5,58E-05 | 0,036816 |
| IGFBP2     | 2,426366 | 6,131182 | 5,62E-05 | 0,036816 |
| BMP5       | -4,29845 | 2,251389 | 5,96E-05 | 0,036816 |
| CORIN      | 3,879725 | 2,66953  | 6,02E-05 | 0,036816 |
| EPHB6      | -3,75112 | 3,474429 | 6,06E-05 | 0,036816 |
| ABCB4      | 3,47886  | 1,554    | 6,34E-05 | 0,036816 |
| CPXM2      | 4,134199 | 0,996904 | 6,38E-05 | 0,036816 |
| AL590004.3 | 3,968475 | 0,74743  | 6,88E-05 | 0,03868  |
| GLDN       | -2,51317 | 5,804362 | 8,12E-05 | 0,044478 |
| NKD2       | -3,10426 | 1,538811 | 9,09E-05 | 0,048326 |
| PRR5L      | 3,031372 | 2,007677 | 9,30E-05 | 0,048326 |
| KRT7       | 3,755878 | 3,05417  | 9,51E-05 | 0,048326 |
| C1QTNF1    | -1,69415 | 4,968964 | 0,000101 | 0,049984 |



**Table S2. Differentially expressed genes between normal and cancer-associated fibroblasts in the GSE 68164 cohort of PCa**

| ID           | adj.P.Val | P.Value  | t        | B     | logFC    | GI       | Gene.symbol |
|--------------|-----------|----------|----------|-------|----------|----------|-------------|
| ILMN_2060086 | 0,999     | 0,024616 | -2,77414 | -3,68 | -1,58857 | 4,99E+08 | ADAM23      |
| ILMN_1681886 | 0,999     | 0,002087 | 4,506955 | -2,95 | 1,147516 | 1E+09    | ADAMTS5     |
| ILMN_1657111 | 0,999     | 0,011107 | -3,30381 | -3,41 | -1,84974 | 1,57E+08 | AHNAK2      |
| ILMN_2086890 | 0,999     | 0,001079 | 5,028668 | -2,8  | 1,135729 | 9,31E+08 | ANGPT1      |
| ILMN_1671263 | 0,999     | 0,00061  | -5,50681 | -2,69 | -1,5708  | 53832008 | CACNA1H     |
| ILMN_1712532 | 0,999     | 0,043877 | 2,398604 | -3,89 | 1,422036 | 1,96E+08 | CARD9       |
| ILMN_1669982 | 0,999     | 0,001153 | 4,974831 | -2,81 | 1,167262 | 1,23E+08 | CCDC85A     |
| ILMN_2396444 | 0,999     | 0,012307 | 3,23436  | -3,44 | 1,101351 | 2,92E+08 | CD14        |
| ILMN_1719433 | 0,999     | 0,014871 | 3,107267 | -3,51 | 1,215376 | 1,11E+08 | CD1D        |
| ILMN_1678493 | 0,999     | 0,012119 | 3,244749 | -3,44 | 1,327039 | 3,31E+08 | CHN1        |
| ILMN_1691339 | 0,999     | 0,00378  | 4,061966 | -3,1  | 1,216423 | 6,63E+08 | CLEC1A      |
| ILMN_1741688 | 0,999     | 0,001374 | -4,83423 | -2,85 | -2,85627 | 2,23E+08 | CPXM2       |
| ILMN_1694432 | 0,999     | 0,004713 | -3,90202 | -3,16 | -1,82269 | 3,99E+08 | CRIP2       |
| ILMN_1758128 | 0,999     | 0,000759 | 5,320457 | -2,73 | 1,076072 | 3,74E+08 | CYGB        |
| ILMN_1703852 | 0,16      | 1,29E-05 | -9,63402 | -2,18 | -2,01317 | 3,17E+08 | EFNB2       |
| ILMN_1697268 | 0,999     | 0,041913 | 2,428219 | -3,87 | 1,071805 | 60498977 | EMILIN2     |
| ILMN_1781943 | 0,999     | 0,004076 | -4,00692 | -3,12 | -1,09593 | 1,16E+08 | FAM83D      |
| ILMN_1769615 | 0,999     | 0,00254  | -4,35746 | -3    | -1,88479 | 62241047 | FLRT2       |
| ILMN_1668052 | 0,999     | 0,017724 | -2,99043 | -3,56 | -1,33731 | 1,94E+08 | FOXA2       |
| ILMN_1659678 | 0,409     | 6,6E-05  | -7,66712 | -2,35 | -1,18762 | 1,67E+08 | GABRA2      |
| ILMN_2352090 | 0,999     | 0,035249 | 2,540343 | -3,8  | 1,093972 | 40217832 | GPRC5C      |
| ILMN_1808590 | 0,999     | 0,003536 | -4,11089 | -3,08 | -1,06321 | 3,74E+08 | GUCY1A3     |
| ILMN_1664861 | 0,999     | 0,039655 | 2,464056 | -3,85 | 1,015809 | 3,42E+08 | ID1         |
| ILMN_1725193 | 0,999     | 0,040019 | -2,45813 | -3,85 | -1,81465 | 55925575 | IGFBP2      |
| ILMN_1763390 | 0,409     | 4,96E-05 | -7,98398 | -2,31 | -1,71747 | 1,15E+08 | ISL1        |
| ILMN_1669404 | 0,999     | 0,039364 | 2,468823 | -3,85 | 1,076971 | 1,17E+08 | KISS1       |
| ILMN_1730777 | 0,999     | 0,004582 | -3,92229 | -3,15 | -1,94863 | 1,31E+08 | KRT19       |
| ILMN_2163723 | 0,999     | 0,021092 | 2,875547 | -3,62 | 1,259429 | 67782364 | KRT7        |
| ILMN_2063168 | 0,999     | 0,037123 | -2,50676 | -3,82 | -1,45714 | 2,12E+08 | MALL        |
| ILMN_1672660 | 0,999     | 0,007777 | -3,54843 | -3,3  | -1,63993 | 68509937 | MBP         |
| ILMN_1660462 | 0,999     | 0,04312  | 2,409864 | -3,88 | 1,110164 | 7,33E+08 | MCOLN2      |
| ILMN_1910180 | 0,999     | 0,009209 | -3,43174 | -3,35 | -1,00908 | 10437021 | NRP2        |
| ILMN_2189371 | 0,999     | 0,034492 | -2,55442 | -3,8  | -1,5677  | 9,18E+08 | NTNG1       |
| ILMN_3236858 | 0,999     | 0,000691 | 5,400602 | -2,71 | 1,211205 | 1,27E+08 | NYNRIN      |
| ILMN_1804929 | 0,999     | 0,044668 | 2,387068 | -3,89 | 1,122145 | 32307151 | OXTR        |
| ILMN_1721770 | 0,999     | 0,008131 | 3,51756  | -3,32 | 1,299356 | 9,67E+08 | PAPPA       |
| ILMN_1790778 | 0,999     | 0,000899 | 5,179119 | -2,76 | 1,607315 | 1,57E+08 | PNMA2       |
| ILMN_2196328 | 0,999     | 0,040766 | -2,44617 | -3,86 | -1,22614 | 2,1E+08  | POSTN       |
| ILMN_1660732 | 0,999     | 0,007337 | -3,58887 | -3,28 | -2,51055 | 1,88E+08 | PPP2R2B     |
| ILMN_1655077 | 0,999     | 0,008394 | 3,495589 | -3,33 | 1,137711 | 1,72E+08 | PRDM1       |
| ILMN_1798000 | 0,999     | 0,007631 | 3,561541 | -3,3  | 1,039068 | 21361391 | PSG1        |
| ILMN_1685312 | 0,999     | 0,036693 | 2,514311 | -3,82 | 1,68089  | 1,09E+08 | PSG3        |

|              |       |          |          |       |          |          |          |
|--------------|-------|----------|----------|-------|----------|----------|----------|
| ILMN_1693397 | 0,999 | 0,003285 | 4,165237 | -3,06 | 1,106646 | 4,52E+08 | PSG4     |
| ILMN_1728734 | 0,999 | 0,042593 | 2,417809 | -3,87 | 2,14674  | 1,94E+08 | PSG5     |
| ILMN_1718514 | 0,999 | 0,027406 | 2,703995 | -3,71 | 1,494331 | 3,95E+08 | PSG6     |
| ILMN_1772768 | 0,999 | 0,000794 | 5,282746 | -2,74 | 1,283698 | 1,58E+08 | PSG7     |
| ILMN_1801776 | 0,999 | 0,049535 | 2,320237 | -3,93 | 1,404139 | 6,84E+08 | PSG9     |
| ILMN_1806403 | 0,999 | 0,012951 | -3,19999 | -3,46 | -1,31238 | 8,08E+08 | RASL12   |
| ILMN_1808238 | 0,999 | 0,018297 | -2,96937 | -3,57 | -1,22083 | 34915989 | RBPMS2   |
| ILMN_1688630 | 0,999 | 0,001388 | 4,825984 | -2,85 | 1,033403 | 2,07E+08 | RECK     |
| ILMN_1758067 | 0,999 | 0,00679  | -3,64305 | -3,26 | -1,02477 | 1,65E+08 | RGS4     |
| ILMN_1805561 | 0,107 | 3,69E-06 | -11,4142 | -2,1  | -2,25699 | 3,32E+08 | SLC14A1  |
| ILMN_1766261 | 0,999 | 0,026804 | 2,718474 | -3,71 | 1,120744 | 93277101 | SLC2A12  |
| ILMN_1774127 | 0,999 | 0,001831 | -4,6082  | -2,92 | -1,11177 | 6,36E+08 | STAC     |
| ILMN_3244117 | 0,999 | 0,004409 | -3,95001 | -3,14 | -1,26504 | 4,44E+08 | STMN3    |
| ILMN_1667460 | 0,999 | 0,013566 | 3,168784 | -3,48 | 1,003161 | 2,4E+08  | SULF2    |
| ILMN_2374115 | 0,999 | 0,004594 | 3,920358 | -3,15 | 1,177922 | 1,09E+08 | TFAP2A   |
| ILMN_1701461 | 0,999 | 0,00368  | 4,081557 | -3,09 | 1,506383 | 75905820 | TIMP3    |
| ILMN_1807169 | 0,999 | 0,031782 | -2,60755 | -3,77 | -1,16845 | 2,1E+08  | TINAGL1  |
| ILMN_1730645 | 0,999 | 0,020355 | -2,89896 | -3,61 | -2,06354 | 7,62E+08 | TMEFF2   |
| ILMN_1791511 | 0,999 | 0,044484 | 2,389724 | -3,89 | 2,095423 | 32484986 | TMEM176A |
| ILMN_2085012 | 0,999 | 0,029643 | 2,652847 | -3,74 | 1,897876 | 1,56E+08 | TMEM176B |
| ILMN_1764769 | 0,999 | 0,025161 | 2,759809 | -3,68 | 1,119898 | 47498550 | VWA5A    |

**Table S3. Differentially expressed genes in 11 clusters of cAFs identified by single-cell RNA seq in PCa**

| ID        | p_val    | avg_log2FC | pct.1 | pct.2 | p_val_adj | cluster | gene      |
|-----------|----------|------------|-------|-------|-----------|---------|-----------|
| IFITM3    | 3,16E-68 | 0,392606   | 1     | 1     | 6,04E-64  | 0       | IFITM3    |
| MYL9      | 5,48E-67 | 0,433935   | 1     | 1     | 1,05E-62  | 0       | MYL9      |
| MYL6      | 3,17E-52 | 0,344065   | 1     | 1     | 6,06E-48  | 0       | MYL6      |
| B2M       | 3,17E-44 | 0,307425   | 1     | 1     | 6,06E-40  | 0       | B2M       |
| FHL2      | 2,24E-43 | 0,352943   | 1     | 0,996 | 4,29E-39  | 0       | FHL2      |
| DCN       | 1,02E-42 | 0,49688    | 1     | 0,999 | 1,95E-38  | 0       | DCN       |
| ACTA2     | 1,23E-40 | 0,611423   | 1     | 0,998 | 2,36E-36  | 0       | ACTA2     |
| ACTG2     | 9,29E-40 | 0,308491   | 1     | 1     | 1,78E-35  | 0       | ACTG2     |
| HSPB1     | 3,46E-34 | 0,268679   | 1     | 1     | 6,62E-30  | 0       | HSPB1     |
| MYLK      | 9,41E-32 | 0,393896   | 1     | 0,999 | 1,80E-27  | 0       | MYLK      |
| PDLIM1    | 1,16E-30 | 0,268265   | 1     | 0,998 | 2,23E-26  | 0       | PDLIM1    |
| MFAP4     | 4,36E-30 | 0,274973   | 0,993 | 0,906 | 8,33E-26  | 0       | MFAP4     |
| IFITM2    | 5,42E-30 | 0,301119   | 0,998 | 0,996 | 1,04E-25  | 0       | IFITM2    |
| HLA-B     | 8,58E-30 | 0,269333   | 1     | 0,998 | 1,64E-25  | 0       | HLA-B     |
| RARRES3   | 1,22E-28 | 0,298006   | 0,995 | 0,944 | 2,33E-24  | 0       | RARRES3   |
| COL3A1    | 6,32E-28 | 0,291715   | 1     | 0,992 | 1,21E-23  | 0       | COL3A1    |
| FBLN1     | 2,16E-27 | 0,260629   | 1     | 0,99  | 4,14E-23  | 0       | FBLN1     |
| CFD       | 9,17E-26 | 0,351769   | 0,979 | 0,946 | 1,75E-21  | 0       | CFD       |
| TAGLN     | 1,73E-22 | 0,298714   | 1     | 1     | 3,31E-18  | 0       | TAGLN     |
| CSRP1     | 2,67E-22 | 0,25575    | 0,998 | 0,984 | 5,11E-18  | 0       | CSRP1     |
| RARRES2   | 2,11E-21 | 0,404552   | 0,993 | 0,984 | 4,03E-17  | 0       | RARRES2   |
| RBP1      | 3,31E-21 | 0,301176   | 0,917 | 0,843 | 6,33E-17  | 0       | RBP1      |
| FHL1      | 3,47E-20 | 0,300647   | 0,924 | 0,875 | 6,64E-16  | 0       | FHL1      |
| CXCL1     | 5,88E-17 | 0,39304    | 0,768 | 0,647 | 1,12E-12  | 0       | CXCL1     |
| RPL7A     | 9,98E-78 | 0,277903   | 1     | 1     | 1,91E-73  | 1       | RPL7A     |
| RPS3      | 3,27E-75 | 0,279544   | 1     | 1     | 6,25E-71  | 1       | RPS3      |
| RPS12     | 6,84E-72 | 0,262031   | 1     | 1     | 1,31E-67  | 1       | RPS12     |
| RPS18     | 3,26E-70 | 0,273394   | 1     | 1     | 6,23E-66  | 1       | RPS18     |
| RPL3      | 3,41E-70 | 0,283834   | 1     | 1     | 6,53E-66  | 1       | RPL3      |
| RPL10A    | 1,18E-67 | 0,263645   | 1     | 1     | 2,27E-63  | 1       | RPL10A    |
| RPL12     | 3,02E-62 | 0,27153    | 1     | 1     | 5,78E-58  | 1       | RPL12     |
| RPL8      | 3,22E-62 | 0,261363   | 1     | 1     | 6,15E-58  | 1       | RPL8      |
| GNB2L1    | 3,91E-60 | 0,258433   | 1     | 1     | 7,49E-56  | 1       | GNB2L1    |
| RPSA      | 3,19E-51 | 0,282035   | 1     | 1     | 6,10E-47  | 1       | RPSA      |
| RPS2      | 5,27E-51 | 0,335246   | 1     | 1     | 1,01E-46  | 1       | RPS2      |
| SLC25A6   | 3,14E-40 | 0,251551   | 1     | 1     | 6,00E-36  | 1       | SLC25A6   |
| HMGA1     | 6,70E-32 | 0,401292   | 0,995 | 0,965 | 1,28E-27  | 1       | HMGA1     |
| FTL       | 4,74E-29 | 0,290601   | 1     | 1     | 9,07E-25  | 1       | FTL       |
| SNHG8     | 7,22E-24 | 0,276102   | 0,997 | 0,967 | 1,38E-19  | 1       | SNHG8     |
| CD44      | 1,59E-22 | 0,250918   | 1     | 0,999 | 3,03E-18  | 1       | CD44      |
| METRNL    | 1,18E-20 | 0,2555     | 0,971 | 0,884 | 2,25E-16  | 1       | METRNL    |
| VIM       | 4,03E-19 | 0,290322   | 1     | 1     | 7,71E-15  | 1       | VIM       |
| GLRX      | 8,27E-83 | 0,978023   | 1     | 0,993 | 1,58E-78  | 2       | GLRX      |
| TNFRSF12A | 1,92E-75 | 0,660891   | 1     | 0,952 | 3,67E-71  | 2       | TNFRSF12A |
| PHLDA2    | 4,00E-74 | 0,738809   | 1     | 0,963 | 7,65E-70  | 2       | PHLDA2    |
| COTL1     | 1,46E-69 | 0,586709   | 1     | 0,977 | 2,80E-65  | 2       | COTL1     |
| TNFRSF11B | 2,70E-68 | 0,689543   | 0,997 | 0,891 | 5,17E-64  | 2       | TNFRSF11B |
| SEC61G    | 6,10E-65 | 0,440661   | 1     | 0,998 | 1,17E-60  | 2       | SEC61G    |

|           |          |          |       |       |          |               |
|-----------|----------|----------|-------|-------|----------|---------------|
| CCL2      | 2,78E-64 | 1,294465 | 0,956 | 0,76  | 5,31E-60 | 2 CCL2        |
| STC2      | 4,32E-61 | 0,62764  | 0,99  | 0,864 | 8,27E-57 | 2 STC2        |
| TXNRD1    | 1,35E-57 | 0,493255 | 1     | 0,997 | 2,59E-53 | 2 TXNRD1      |
| LINC00152 | 9,47E-57 | 0,498098 | 1     | 0,986 | 1,81E-52 | 2 LINC00152   |
| PFN1      | 6,21E-56 | 0,393451 | 1     | 1     | 1,19E-51 | 2 PFN1        |
| SRM       | 3,05E-55 | 0,441936 | 1     | 0,965 | 5,84E-51 | 2 SRM         |
| GPRC5A    | 1,31E-54 | 0,523351 | 0,987 | 0,848 | 2,50E-50 | 2 GPRC5A      |
| CALM2     | 1,25E-51 | 0,436592 | 1     | 1     | 2,40E-47 | 2 CALM2       |
| ARPC2     | 2,54E-51 | 0,433479 | 1     | 0,999 | 4,85E-47 | 2 ARPC2       |
| SH3BGRL3  | 2,25E-49 | 0,490949 | 1     | 0,997 | 4,30E-45 | 2 SH3BGRL3    |
| GAS6      | 1,13E-47 | 0,636559 | 1     | 0,988 | 2,15E-43 | 2 GAS6        |
| PDCD5     | 2,79E-45 | 0,361709 | 1     | 0,988 | 5,33E-41 | 2 PDCD5       |
| KRT10     | 5,93E-45 | 0,375727 | 1     | 0,986 | 1,13E-40 | 2 KRT10       |
| IGFBP3    | 1,14E-44 | 0,575862 | 0,965 | 0,754 | 2,18E-40 | 2 IGFBP3      |
| MTDH      | 5,14E-44 | 0,320402 | 1     | 0,993 | 9,83E-40 | 2 MTDH        |
| CYCS      | 2,56E-43 | 0,353552 | 0,997 | 0,963 | 4,90E-39 | 2 CYCS        |
| MPC2      | 2,85E-42 | 0,430744 | 1     | 0,986 | 5,45E-38 | 2 MPC2        |
| ANGPT1    | 3,14E-42 | 0,32051  | 0,863 | 0,505 | 6,01E-38 | 2 ANGPT1      |
| DKK1      | 5,90E-42 | 0,502339 | 0,921 | 0,667 | 1,13E-37 | 2 DKK1        |
| PRELID1   | 6,23E-42 | 0,328789 | 1     | 0,997 | 1,19E-37 | 2 PRELID1     |
| UGCG      | 2,64E-41 | 0,36153  | 0,943 | 0,741 | 5,05E-37 | 2 UGCG        |
| MIR4435-2 | 5,45E-41 | 0,387853 | 1     | 0,95  | 1,04E-36 | 2 MIR4435-2HG |
| CITED2    | 7,14E-41 | 0,472444 | 0,997 | 0,935 | 1,36E-36 | 2 CITED2      |
| TIMM8B    | 1,18E-40 | 0,362908 | 1     | 0,974 | 2,27E-36 | 2 TIMM8B      |
| ZFAND5    | 1,64E-40 | 0,438152 | 1     | 0,984 | 3,14E-36 | 2 ZFAND5      |
| ASPH      | 2,12E-40 | 0,37288  | 1     | 0,985 | 4,05E-36 | 2 ASPH        |
| NHP2      | 1,11E-39 | 0,351334 | 1     | 0,964 | 2,11E-35 | 2 NHP2        |
| GTF2A2    | 1,75E-39 | 0,371394 | 0,997 | 0,951 | 3,36E-35 | 2 GTF2A2      |
| USMG5     | 2,06E-39 | 0,294109 | 1     | 0,997 | 3,95E-35 | 2 USMG5       |
| SMURF2    | 7,85E-39 | 0,40023  | 0,99  | 0,822 | 1,50E-34 | 2 SMURF2      |
| PPP1R14B  | 8,10E-39 | 0,368883 | 1     | 0,961 | 1,55E-34 | 2 PPP1R14B    |
| KRTAP1-5  | 1,16E-38 | 0,380978 | 0,632 | 0,304 | 2,23E-34 | 2 KRTAP1-5    |
| RND3      | 2,21E-38 | 0,410015 | 1     | 0,997 | 4,23E-34 | 2 RND3        |
| RAB32     | 8,09E-38 | 0,348956 | 1     | 0,99  | 1,55E-33 | 2 RAB32       |
| MEST      | 1,90E-37 | 0,55913  | 0,956 | 0,818 | 3,64E-33 | 2 MEST        |
| ATP5G1    | 2,04E-37 | 0,322577 | 1     | 0,967 | 3,90E-33 | 2 ATP5G1      |
| BID       | 2,32E-37 | 0,255639 | 0,952 | 0,697 | 4,44E-33 | 2 BID         |
| POMP      | 8,10E-37 | 0,289495 | 1     | 1     | 1,55E-32 | 2 POMP        |
| HSBP1L1   | 8,66E-37 | 0,335808 | 0,99  | 0,96  | 1,66E-32 | 2 HSBP1L1     |
| ODC1      | 2,30E-36 | 0,303942 | 0,959 | 0,75  | 4,39E-32 | 2 ODC1        |
| OPN3      | 2,75E-36 | 0,439959 | 0,911 | 0,663 | 5,26E-32 | 2 OPN3        |
| ARPC5     | 4,37E-36 | 0,334892 | 1     | 0,989 | 8,36E-32 | 2 ARPC5       |
| SBF2-AS1  | 5,03E-36 | 0,474129 | 1     | 0,942 | 9,62E-32 | 2 SBF2-AS1    |
| CAV2      | 6,66E-36 | 0,345913 | 0,99  | 0,912 | 1,27E-31 | 2 CAV2        |
| TMEM14B   | 1,11E-35 | 0,343453 | 1     | 0,97  | 2,13E-31 | 2 TMEM14B     |
| GCLM      | 1,24E-35 | 0,470739 | 0,994 | 0,962 | 2,36E-31 | 2 GCLM        |
| TFAP2A    | 2,21E-35 | 0,271663 | 0,873 | 0,591 | 4,23E-31 | 2 TFAP2A      |
| IGFBP5    | 1,42E-34 | 0,606282 | 1     | 1     | 2,72E-30 | 2 IGFBP5      |
| SELM      | 1,65E-34 | 0,301328 | 1     | 1     | 3,15E-30 | 2 SELM        |
| C20orf24  | 3,60E-34 | 0,313306 | 0,994 | 0,91  | 6,89E-30 | 2 C20orf24    |

|          |          |          |       |       |          |            |
|----------|----------|----------|-------|-------|----------|------------|
| DDA1     | 4,81E-34 | 0,278768 | 0,987 | 0,889 | 9,20E-30 | 2 DDA1     |
| HEBP1    | 1,17E-33 | 0,311737 | 0,997 | 0,988 | 2,23E-29 | 2 HEBP1    |
| DYNLL1   | 8,72E-33 | 0,346344 | 1     | 0,998 | 1,67E-28 | 2 DYNLL1   |
| SLC20A2  | 9,26E-33 | 0,296216 | 0,87  | 0,626 | 1,77E-28 | 2 SLC20A2  |
| DAB2     | 1,56E-32 | 0,435029 | 1     | 0,989 | 2,99E-28 | 2 DAB2     |
| COX7A2   | 2,88E-32 | 0,259317 | 1     | 0,999 | 5,52E-28 | 2 COX7A2   |
| FKBP1A   | 4,24E-32 | 0,280268 | 1     | 0,996 | 8,10E-28 | 2 FKBP1A   |
| CYR61    | 4,78E-32 | 0,402971 | 1     | 0,962 | 9,15E-28 | 2 CYR61    |
| F3       | 8,55E-32 | 0,386977 | 0,933 | 0,751 | 1,64E-27 | 2 F3       |
| MLF2     | 1,10E-31 | 0,284498 | 1     | 0,981 | 2,10E-27 | 2 MLF2     |
| UQCR10   | 1,95E-31 | 0,25923  | 1     | 0,995 | 3,73E-27 | 2 UQCR10   |
| SRGN     | 2,04E-31 | 0,426426 | 0,851 | 0,62  | 3,90E-27 | 2 SRGN     |
| CCND1    | 2,19E-31 | 0,436216 | 0,994 | 0,964 | 4,18E-27 | 2 CCND1    |
| NME1     | 5,40E-31 | 0,276333 | 0,987 | 0,934 | 1,03E-26 | 2 NME1     |
| EMC6     | 7,53E-31 | 0,259662 | 0,997 | 0,933 | 1,44E-26 | 2 EMC6     |
| NEDD8    | 7,69E-31 | 0,253083 | 1     | 0,999 | 1,47E-26 | 2 NEDD8    |
| CTNNAL1  | 9,60E-31 | 0,283867 | 0,946 | 0,731 | 1,84E-26 | 2 CTNNAL1  |
| OSTC     | 1,08E-30 | 0,270946 | 1     | 0,994 | 2,06E-26 | 2 OSTC     |
| KRT18    | 1,25E-30 | 0,554062 | 0,937 | 0,762 | 2,39E-26 | 2 KRT18    |
| POLE4    | 3,48E-30 | 0,281912 | 1     | 0,973 | 6,65E-26 | 2 POLE4    |
| SERP1    | 6,20E-30 | 0,259254 | 1     | 0,993 | 1,19E-25 | 2 SERP1    |
| PFN2     | 7,62E-30 | 0,274176 | 0,997 | 0,971 | 1,46E-25 | 2 PFN2     |
| RHEB     | 1,03E-29 | 0,267067 | 1     | 0,985 | 1,97E-25 | 2 RHEB     |
| MYDGF    | 6,53E-29 | 0,337141 | 1     | 0,997 | 1,25E-24 | 2 MYDGF    |
| EIF4EBP1 | 8,95E-29 | 0,383618 | 0,997 | 0,97  | 1,71E-24 | 2 EIF4EBP1 |
| GNG11    | 1,58E-28 | 0,326109 | 1     | 0,998 | 3,02E-24 | 2 GNG11    |
| SNU13    | 1,77E-28 | 0,250265 | 1     | 0,994 | 3,39E-24 | 2 SNU13    |
| RRAS2    | 1,78E-28 | 0,260707 | 0,978 | 0,852 | 3,41E-24 | 2 RRAS2    |
| ZYX      | 1,90E-28 | 0,296239 | 1     | 0,954 | 3,64E-24 | 2 ZYX      |
| CAV1     | 3,86E-28 | 0,470401 | 1     | 0,999 | 7,37E-24 | 2 CAV1     |
| CLTB     | 5,51E-28 | 0,295581 | 1     | 0,98  | 1,05E-23 | 2 CLTB     |
| LHFP     | 5,95E-28 | 0,292393 | 0,99  | 0,949 | 1,14E-23 | 2 LHFP     |
| C7orf73  | 8,57E-28 | 0,283989 | 1     | 0,98  | 1,64E-23 | 2 C7orf73  |
| BDNF     | 2,13E-27 | 0,381871 | 0,952 | 0,821 | 4,06E-23 | 2 BDNF     |
| BOLA3    | 2,38E-27 | 0,253215 | 0,984 | 0,86  | 4,56E-23 | 2 BOLA3    |
| SLC16A3  | 2,83E-27 | 0,270053 | 0,99  | 0,903 | 5,41E-23 | 2 SLC16A3  |
| PLAU     | 4,82E-27 | 0,442928 | 0,914 | 0,739 | 9,22E-23 | 2 PLAU     |
| MKKS     | 9,59E-27 | 0,26133  | 0,99  | 0,923 | 1,83E-22 | 2 MKKS     |
| RGCC     | 1,13E-26 | 0,436369 | 0,562 | 0,296 | 2,17E-22 | 2 RGCC     |
| CFL1     | 1,34E-26 | 0,271387 | 1     | 1     | 2,57E-22 | 2 CFL1     |
| SULF1    | 2,31E-26 | 0,361533 | 0,886 | 0,712 | 4,41E-22 | 2 SULF1    |
| MRPL14   | 2,36E-26 | 0,284022 | 1     | 0,974 | 4,51E-22 | 2 MRPL14   |
| GTF2H5   | 2,36E-26 | 0,270217 | 1     | 0,985 | 4,51E-22 | 2 GTF2H5   |
| FTL1     | 2,52E-26 | 0,316463 | 1     | 1     | 4,81E-22 | 2 FTL      |
| STAT1    | 5,40E-26 | 0,286431 | 0,99  | 0,946 | 1,03E-21 | 2 STAT1    |
| SLC7A11  | 9,36E-26 | 0,30288  | 0,965 | 0,801 | 1,79E-21 | 2 SLC7A11  |
| COX20    | 1,23E-25 | 0,265367 | 0,994 | 0,938 | 2,36E-21 | 2 COX20    |
| ARHGAP29 | 1,61E-25 | 0,279883 | 0,978 | 0,854 | 3,08E-21 | 2 ARHGAP29 |
| CCND3    | 3,94E-25 | 0,268895 | 0,876 | 0,685 | 7,54E-21 | 2 CCND3    |
| RPL22L1  | 5,04E-25 | 0,35934  | 0,997 | 0,971 | 9,64E-21 | 2 RPL22L1  |

|          |          |          |       |       |          |            |
|----------|----------|----------|-------|-------|----------|------------|
| PELO     | 1,14E-24 | 0,26052  | 0,962 | 0,796 | 2,18E-20 | 2 PELO     |
| P3H2     | 2,00E-24 | 0,2551   | 0,902 | 0,692 | 3,82E-20 | 2 P3H2     |
| EXT1     | 3,64E-23 | 0,27804  | 0,997 | 0,931 | 6,96E-19 | 2 EXT1     |
| CDC42EP1 | 3,77E-23 | 0,252279 | 0,956 | 0,844 | 7,21E-19 | 2 CDC42EP1 |
| LMO7     | 2,69E-22 | 0,26719  | 1     | 0,943 | 5,14E-18 | 2 LMO7     |
| GADD45A  | 3,13E-22 | 0,266934 | 0,949 | 0,802 | 5,99E-18 | 2 GADD45A  |
| VASP     | 4,38E-22 | 0,261405 | 0,975 | 0,886 | 8,37E-18 | 2 VASP     |
| POC1B    | 4,57E-21 | 0,257794 | 0,708 | 0,48  | 8,73E-17 | 2 POC1B    |
| PAPSS2   | 3,66E-20 | 0,255195 | 0,994 | 0,914 | 7,00E-16 | 2 PAPSS2   |
| OXTR     | 5,29E-20 | 0,266771 | 0,775 | 0,526 | 1,01E-15 | 2 OXTR     |
| TUBB6    | 3,82E-19 | 0,251225 | 0,994 | 0,97  | 7,30E-15 | 2 TUBB6    |
| CYB5A    | 3,92E-17 | 0,271549 | 1     | 0,988 | 7,50E-13 | 2 CYB5A    |
| BRIX1    | 8,65E-17 | 0,293898 | 0,943 | 0,803 | 1,65E-12 | 2 BRIX1    |
| CEMIP    | 4,43E-16 | 0,291396 | 0,933 | 0,752 | 8,48E-12 | 2 CEMIP    |
| FST      | 2,06E-15 | 0,270673 | 0,829 | 0,647 | 3,94E-11 | 2 FST      |
| HMGA11   | 7,82E-15 | 0,270412 | 0,997 | 0,966 | 1,50E-10 | 2 HMGA1    |
| PDLIM7   | 8,64E-15 | 0,254576 | 1     | 0,995 | 1,65E-10 | 2 PDLIM7   |
| CYP1B1   | 3,66E-14 | 0,292342 | 0,629 | 0,422 | 7,00E-10 | 2 CYP1B1   |
| USP53    | 4,57E-14 | 0,279821 | 0,933 | 0,787 | 8,74E-10 | 2 USP53    |
| MT1E     | 7,56E-14 | 0,291447 | 1     | 0,959 | 1,45E-09 | 2 MT1E     |
| MT2A     | 3,48E-11 | 0,559309 | 1     | 0,999 | 6,66E-07 | 2 MT2A     |
| ADM      | 9,60E-11 | 0,257971 | 0,987 | 0,945 | 1,84E-06 | 2 ADM      |
| RHOBTB3  | 1,62E-10 | 0,250686 | 1     | 0,996 | 3,09E-06 | 2 RHOBTB3  |
| TIMP3    | 1,63E-10 | 0,259367 | 0,854 | 0,719 | 3,11E-06 | 2 TIMP3    |
| COL1A2   | 1,36E-89 | 0,678883 | 1     | 0,999 | 2,60E-85 | 3 COL1A2   |
| COL14A1  | 4,64E-89 | 0,83895  | 0,981 | 0,824 | 8,88E-85 | 3 COL14A1  |
| MGP      | 7,64E-86 | 1,808004 | 0,984 | 0,816 | 1,46E-81 | 3 MGP      |
| MFAP4    | 8,00E-82 | 1,133897 | 0,971 | 0,912 | 1,53E-77 | 3 MFAP4    |
| C1S      | 1,17E-78 | 0,807523 | 1     | 0,985 | 2,24E-74 | 3 C1S      |
| NR2F1    | 3,05E-70 | 0,798167 | 0,994 | 0,972 | 5,83E-66 | 3 NR2F1    |
| COL3A1   | 5,91E-67 | 0,7098   | 1     | 0,992 | 1,13E-62 | 3 COL3A1   |
| PTGDS    | 4,27E-62 | 1,417567 | 0,984 | 0,891 | 8,17E-58 | 3 PTGDS    |
| FBLN1    | 7,41E-62 | 0,822699 | 0,997 | 0,991 | 1,42E-57 | 3 FBLN1    |
| NBL1     | 2,28E-60 | 0,646422 | 0,949 | 0,873 | 4,35E-56 | 3 NBL1     |
| PBX1     | 7,56E-60 | 0,560555 | 0,949 | 0,836 | 1,45E-55 | 3 PBX1     |
| MMP2     | 4,25E-59 | 0,643294 | 1     | 0,991 | 8,12E-55 | 3 MMP2     |
| PNRC1    | 8,03E-59 | 0,567956 | 0,977 | 0,959 | 1,53E-54 | 3 PNRC1    |
| MALAT1   | 1,71E-54 | 0,610234 | 1     | 1     | 3,28E-50 | 3 MALAT1   |
| QSOX1    | 4,03E-54 | 0,602345 | 0,994 | 0,992 | 7,70E-50 | 3 QSOX1    |
| LTBP4    | 5,46E-52 | 0,545063 | 0,952 | 0,932 | 1,04E-47 | 3 LTBP4    |
| TGFBI    | 5,59E-51 | 0,614164 | 0,997 | 0,99  | 1,07E-46 | 3 TGFBI    |
| PSAP     | 9,57E-51 | 0,56008  | 1     | 0,996 | 1,83E-46 | 3 PSAP     |
| GRN      | 8,35E-50 | 0,545814 | 0,997 | 0,99  | 1,60E-45 | 3 GRN      |
| PBX3     | 2,11E-49 | 0,52523  | 0,939 | 0,831 | 4,04E-45 | 3 PBX3     |
| SOD3     | 2,70E-49 | 0,657406 | 0,952 | 0,872 | 5,15E-45 | 3 SOD3     |
| SEPP1    | 3,52E-48 | 0,682333 | 0,897 | 0,751 | 6,72E-44 | 3 SEPP1    |
| LRP1     | 6,78E-48 | 0,460415 | 0,977 | 0,962 | 1,30E-43 | 3 LRP1     |
| COL6A2   | 1,02E-47 | 0,470055 | 1     | 0,998 | 1,95E-43 | 3 COL6A2   |
| CXCL12   | 1,03E-46 | 0,484096 | 0,685 | 0,397 | 1,97E-42 | 3 CXCL12   |
| NEAT1    | 1,27E-46 | 0,589768 | 1     | 0,999 | 2,42E-42 | 3 NEAT1    |



|          |          |          |       |       |          |            |
|----------|----------|----------|-------|-------|----------|------------|
| MLXIP    | 2,05E-46 | 0,515349 | 0,974 | 0,935 | 3,93E-42 | 3 MLXIP    |
| SOX4     | 8,02E-46 | 0,572085 | 0,971 | 0,921 | 1,53E-41 | 3 SOX4     |
| VCAN     | 2,35E-45 | 0,324404 | 0,463 | 0,168 | 4,49E-41 | 3 VCAN     |
| REV3L    | 2,61E-45 | 0,478697 | 0,929 | 0,842 | 5,00E-41 | 3 REV3L    |
| NPC2     | 3,46E-44 | 0,466211 | 1     | 0,999 | 6,62E-40 | 3 NPC2     |
| FN1      | 3,79E-44 | 0,493986 | 1     | 0,996 | 7,26E-40 | 3 FN1      |
| RBP11    | 1,34E-43 | 0,604036 | 0,932 | 0,845 | 2,56E-39 | 3 RBP1     |
| CST3     | 2,96E-43 | 0,478197 | 1     | 0,999 | 5,65E-39 | 3 CST3     |
| CCDC80   | 9,84E-43 | 0,722925 | 1     | 0,999 | 1,88E-38 | 3 CCDC80   |
| SERPING1 | 2,80E-41 | 0,541943 | 0,878 | 0,761 | 5,34E-37 | 3 SERPING1 |
| PLPP1    | 2,82E-41 | 0,535329 | 0,936 | 0,837 | 5,39E-37 | 3 PLPP1    |
| PARM1    | 4,38E-41 | 0,33226  | 0,531 | 0,238 | 8,38E-37 | 3 PARM1    |
| CDH11    | 3,82E-40 | 0,401969 | 0,926 | 0,861 | 7,30E-36 | 3 CDH11    |
| PFDN5    | 8,34E-40 | 0,26147  | 1     | 1     | 1,59E-35 | 3 PFDN5    |
| SMPDL3A  | 1,71E-39 | 0,505089 | 0,968 | 0,922 | 3,26E-35 | 3 SMPDL3A  |
| RPLP1    | 4,96E-39 | 0,256246 | 1     | 1     | 9,49E-35 | 3 RPLP1    |
| DCN1     | 2,35E-38 | 0,638747 | 1     | 0,999 | 4,50E-34 | 3 DCN      |
| CCNI     | 8,17E-38 | 0,369096 | 0,997 | 0,998 | 1,56E-33 | 3 CCNI     |
| N4BP2L2  | 1,01E-37 | 0,419697 | 0,994 | 0,972 | 1,93E-33 | 3 N4BP2L2  |
| C12orf57 | 2,54E-37 | 0,384491 | 0,994 | 0,992 | 4,86E-33 | 3 C12orf57 |
| C1R      | 4,01E-37 | 0,577083 | 0,997 | 0,974 | 7,68E-33 | 3 C1R      |
| CTSK     | 8,45E-37 | 0,801252 | 0,955 | 0,899 | 1,62E-32 | 3 CTSK     |
| MYO6     | 2,77E-36 | 0,420638 | 0,894 | 0,824 | 5,30E-32 | 3 MYO6     |
| MEG3     | 3,07E-36 | 0,528272 | 0,997 | 0,97  | 5,87E-32 | 3 MEG3     |
| PNISR    | 3,65E-36 | 0,425231 | 0,971 | 0,953 | 6,98E-32 | 3 PNISR    |
| ZFP36L1  | 4,88E-36 | 0,454497 | 0,971 | 0,97  | 9,33E-32 | 3 ZFP36L1  |
| FOXN3    | 6,10E-36 | 0,365056 | 0,794 | 0,645 | 1,17E-31 | 3 FOXN3    |
| EIF3E    | 6,31E-36 | 0,356992 | 0,99  | 1     | 1,21E-31 | 3 EIF3E    |
| H3F3A    | 1,09E-35 | 0,339565 | 1     | 1     | 2,09E-31 | 3 H3F3A    |
| FMOD     | 2,21E-35 | 0,329802 | 0,55  | 0,284 | 4,22E-31 | 3 FMOD     |
| COL8A1   | 2,57E-35 | 0,466924 | 0,736 | 0,541 | 4,92E-31 | 3 COL8A1   |
| COL6A3   | 1,72E-34 | 0,355928 | 1     | 0,993 | 3,29E-30 | 3 COL6A3   |
| GLTSCR2  | 2,77E-34 | 0,384322 | 0,997 | 0,994 | 5,29E-30 | 3 GLTSCR2  |
| TIMP2    | 5,87E-34 | 0,379723 | 0,997 | 0,991 | 1,12E-29 | 3 TIMP2    |
| BTG1     | 2,43E-33 | 0,487795 | 0,981 | 0,968 | 4,65E-29 | 3 BTG1     |
| COL6A1   | 4,77E-33 | 0,388571 | 1     | 0,996 | 9,12E-29 | 3 COL6A1   |
| HTRA1    | 5,09E-33 | 0,444338 | 0,839 | 0,71  | 9,74E-29 | 3 HTRA1    |
| GPNMB    | 5,31E-33 | 0,521142 | 0,968 | 0,93  | 1,01E-28 | 3 GPNMB    |
| PCBP2    | 1,82E-32 | 0,286489 | 0,997 | 0,997 | 3,48E-28 | 3 PCBP2    |
| APP      | 2,65E-32 | 0,395713 | 0,981 | 0,978 | 5,07E-28 | 3 APP      |
| SERPINF1 | 3,28E-32 | 0,633735 | 0,887 | 0,824 | 6,28E-28 | 3 SERPINF1 |
| CTSF     | 1,30E-31 | 0,385833 | 0,717 | 0,528 | 2,49E-27 | 3 CTSF     |
| PTN      | 1,39E-31 | 0,498563 | 0,994 | 0,994 | 2,65E-27 | 3 PTN      |
| ANGPTL2  | 7,51E-31 | 0,391043 | 0,913 | 0,848 | 1,44E-26 | 3 ANGPTL2  |
| ZFP36L2  | 2,92E-30 | 0,421414 | 0,981 | 0,966 | 5,58E-26 | 3 ZFP36L2  |
| RGS10    | 3,02E-30 | 0,370733 | 0,971 | 0,984 | 5,77E-26 | 3 RGS10    |
| CAMLG    | 6,81E-30 | 0,3598   | 0,965 | 0,959 | 1,30E-25 | 3 CAMLG    |
| ADH1B    | 1,77E-29 | 0,369393 | 0,36  | 0,132 | 3,39E-25 | 3 ADH1B    |
| HCFC1R1  | 2,14E-29 | 0,375383 | 0,936 | 0,904 | 4,09E-25 | 3 HCFC1R1  |
| PTMA     | 2,69E-29 | 0,467047 | 0,997 | 1     | 5,15E-25 | 3 PTMA     |

|           |          |          |       |       |          |             |
|-----------|----------|----------|-------|-------|----------|-------------|
| NID1      | 3,28E-29 | 0,345812 | 0,904 | 0,851 | 6,26E-25 | 3 NID1      |
| RAB13     | 4,49E-29 | 0,391955 | 0,997 | 0,996 | 8,59E-25 | 3 RAB13     |
| CFD1      | 4,89E-29 | 0,703907 | 0,958 | 0,95  | 9,34E-25 | 3 CFD       |
| MEIS2     | 4,96E-29 | 0,3534   | 0,965 | 0,949 | 9,49E-25 | 3 MEIS2     |
| ITGB8     | 5,36E-29 | 0,250278 | 0,537 | 0,299 | 1,03E-24 | 3 ITGB8     |
| EEF2      | 5,79E-29 | 0,2804   | 1     | 1     | 1,11E-24 | 3 EEF2      |
| COL4A2    | 6,68E-29 | 0,358289 | 0,961 | 0,955 | 1,28E-24 | 3 COL4A2    |
| SULF2     | 8,32E-29 | 0,306815 | 0,65  | 0,441 | 1,59E-24 | 3 SULF2     |
| SH3BGRL   | 3,15E-28 | 0,348387 | 0,974 | 0,975 | 6,02E-24 | 3 SH3BGRL   |
| RSPO1     | 4,74E-28 | 0,268878 | 0,595 | 0,361 | 9,06E-24 | 3 RSPO1     |
| PAMR1     | 5,93E-28 | 0,364351 | 0,9   | 0,876 | 1,13E-23 | 3 PAMR1     |
| ERP29     | 6,55E-28 | 0,319339 | 0,997 | 0,993 | 1,25E-23 | 3 ERP29     |
| TXNIP     | 7,31E-28 | 0,419045 | 0,932 | 0,909 | 1,40E-23 | 3 TXNIP     |
| C6orf48   | 8,95E-28 | 0,30629  | 0,984 | 0,996 | 1,71E-23 | 3 C6orf48   |
| ITIH5     | 1,51E-27 | 0,411091 | 0,717 | 0,538 | 2,89E-23 | 3 ITIH5     |
| EMILIN1   | 2,05E-27 | 0,394869 | 0,945 | 0,927 | 3,92E-23 | 3 EMILIN1   |
| FOXP1     | 8,23E-27 | 0,314465 | 0,891 | 0,805 | 1,57E-22 | 3 FOXP1     |
| NREP      | 1,86E-26 | 0,28903  | 0,64  | 0,471 | 3,56E-22 | 3 NREP      |
| GBP2      | 2,04E-26 | 0,364721 | 0,9   | 0,837 | 3,90E-22 | 3 GBP2      |
| LXN       | 2,34E-26 | 0,521327 | 0,965 | 0,936 | 4,47E-22 | 3 LXN       |
| RARRES21  | 6,39E-26 | 0,545083 | 0,987 | 0,985 | 1,22E-21 | 3 RARRES2   |
| ZMAT3     | 9,38E-26 | 0,383747 | 0,952 | 0,928 | 1,79E-21 | 3 ZMAT3     |
| C11orf96  | 1,10E-25 | 0,269981 | 0,421 | 0,193 | 2,11E-21 | 3 C11orf96  |
| MT-ND3    | 3,15E-25 | 0,261622 | 1     | 0,999 | 6,02E-21 | 3 MT-ND3    |
| PCYOX1    | 5,81E-25 | 0,339238 | 0,923 | 0,89  | 1,11E-20 | 3 PCYOX1    |
| JUNB      | 5,82E-25 | 0,481256 | 0,939 | 0,916 | 1,11E-20 | 3 JUNB      |
| AKAP12    | 1,23E-24 | 0,332111 | 0,977 | 0,978 | 2,36E-20 | 3 AKAP12    |
| ITGA11    | 3,01E-24 | 0,27723  | 0,662 | 0,507 | 5,76E-20 | 3 ITGA11    |
| C1orf21   | 4,94E-24 | 0,30454  | 0,926 | 0,901 | 9,45E-20 | 3 C1orf21   |
| NENF      | 4,97E-24 | 0,257407 | 0,99  | 0,993 | 9,51E-20 | 3 NENF      |
| NFIA      | 5,01E-24 | 0,270973 | 0,685 | 0,519 | 9,59E-20 | 3 NFIA      |
| CCPG1     | 6,90E-24 | 0,301742 | 0,804 | 0,684 | 1,32E-19 | 3 CCPG1     |
| CYBRD1    | 7,42E-24 | 0,282989 | 0,952 | 0,945 | 1,42E-19 | 3 CYBRD1    |
| BMPR2     | 9,03E-24 | 0,257256 | 0,807 | 0,727 | 1,73E-19 | 3 BMPR2     |
| LINC01082 | 1,04E-23 | 0,372096 | 0,871 | 0,832 | 2,00E-19 | 3 LINC01082 |
| JUN       | 1,61E-23 | 0,425777 | 0,897 | 0,855 | 3,07E-19 | 3 JUN       |
| SNHG7     | 2,80E-23 | 0,370134 | 0,981 | 0,98  | 5,35E-19 | 3 SNHG7     |
| FRMD6-AS1 | 2,90E-23 | 0,436518 | 0,624 | 0,451 | 5,54E-19 | 3 FRMD6-AS2 |
| BPMS      | 4,81E-23 | 0,268314 | 0,994 | 0,98  | 9,20E-19 | 3 BPMS      |
| SAT1      | 9,63E-23 | 0,400062 | 0,977 | 0,976 | 1,84E-18 | 3 SAT1      |
| COL1A1    | 1,04E-22 | 0,292134 | 1     | 0,997 | 1,99E-18 | 3 COL1A1    |
| EIF4B     | 1,51E-22 | 0,287791 | 0,994 | 0,994 | 2,88E-18 | 3 EIF4B     |
| NR2F1-AS1 | 1,81E-22 | 0,275835 | 0,862 | 0,81  | 3,46E-18 | 3 NR2F1-AS1 |
| B2M1      | 6,14E-22 | 0,25703  | 1     | 1     | 1,17E-17 | 3 B2M       |
| PAPPA     | 8,22E-22 | 0,415087 | 0,842 | 0,766 | 1,57E-17 | 3 PAPPA     |
| FBN1      | 8,34E-22 | 0,332772 | 0,894 | 0,877 | 1,59E-17 | 3 FBN1      |
| FCGRT     | 1,17E-21 | 0,315912 | 0,971 | 0,965 | 2,24E-17 | 3 FCGRT     |
| DDX17     | 1,26E-21 | 0,298422 | 0,977 | 0,967 | 2,40E-17 | 3 DDX17     |
| FXD1      | 1,54E-21 | 0,289727 | 0,582 | 0,413 | 2,94E-17 | 3 FXD1      |
| ZCCHC24   | 1,95E-21 | 0,251635 | 0,772 | 0,714 | 3,72E-17 | 3 ZCCHC24   |

|           |          |          |       |       |          |   |              |
|-----------|----------|----------|-------|-------|----------|---|--------------|
| GPX3      | 2,00E-21 | 0,460952 | 0,733 | 0,593 | 3,83E-17 | 3 | GPX3         |
| UBXN1     | 2,21E-21 | 0,323648 | 0,99  | 0,993 | 4,23E-17 | 3 | UBXN1        |
| PDGFRB    | 2,85E-21 | 0,333115 | 0,871 | 0,857 | 5,45E-17 | 3 | PDGFRB       |
| CIRBP     | 3,33E-21 | 0,286083 | 1     | 0,996 | 6,38E-17 | 3 | CIRBP        |
| WSB1      | 3,40E-21 | 0,402994 | 0,955 | 0,93  | 6,51E-17 | 3 | WSB1         |
| SPRY1     | 3,59E-21 | 0,293924 | 0,508 | 0,321 | 6,87E-17 | 3 | SPRY1        |
| NFIX      | 5,19E-21 | 0,286716 | 0,875 | 0,859 | 9,93E-17 | 3 | NFIX         |
| DDAH2     | 5,51E-21 | 0,291971 | 0,965 | 0,968 | 1,05E-16 | 3 | DDAH2        |
| COL18A1   | 1,51E-20 | 0,289229 | 0,897 | 0,855 | 2,89E-16 | 3 | COL18A1      |
| DDR2      | 1,94E-20 | 0,288119 | 0,955 | 0,958 | 3,70E-16 | 3 | DDR2         |
| RB1CC1    | 4,96E-20 | 0,25806  | 0,9   | 0,893 | 9,48E-16 | 3 | RB1CC1       |
| MMP14     | 1,02E-19 | 0,309606 | 0,977 | 0,95  | 1,96E-15 | 3 | MMP14        |
| RARRES31  | 2,14E-19 | 0,377529 | 0,968 | 0,95  | 4,09E-15 | 3 | RARRES3      |
| STAT3     | 2,20E-19 | 0,258703 | 0,939 | 0,924 | 4,20E-15 | 3 | STAT3        |
| DDX5      | 2,90E-19 | 0,306813 | 1     | 0,992 | 5,55E-15 | 3 | DDX5         |
| ISCU      | 3,27E-19 | 0,267769 | 0,987 | 0,985 | 6,24E-15 | 3 | ISCU         |
| MOXD1     | 4,28E-19 | 0,264776 | 0,772 | 0,69  | 8,18E-15 | 3 | MOXD1        |
| PDGFRA    | 7,58E-19 | 0,291815 | 0,894 | 0,893 | 1,45E-14 | 3 | PDGFRA       |
| THBS1     | 9,41E-19 | 0,318051 | 0,99  | 0,981 | 1,80E-14 | 3 | THBS1        |
| EPB41L4A- | 1,15E-18 | 0,269276 | 0,92  | 0,929 | 2,20E-14 | 3 | EPB41L4A-AS1 |
| SLC25A36  | 1,17E-18 | 0,255774 | 0,955 | 0,946 | 2,23E-14 | 3 | SLC25A36     |
| APOE      | 1,34E-18 | 0,510327 | 0,479 | 0,287 | 2,56E-14 | 3 | APOE         |
| TRIM56    | 1,46E-18 | 0,292118 | 0,875 | 0,871 | 2,79E-14 | 3 | TRIM56       |
| DST       | 1,71E-18 | 0,288533 | 0,99  | 0,99  | 3,28E-14 | 3 | DST          |
| OSR2      | 1,80E-18 | 0,373846 | 0,785 | 0,742 | 3,44E-14 | 3 | OSR2         |
| PCOLCE    | 2,14E-18 | 0,477543 | 0,99  | 0,984 | 4,09E-14 | 3 | PCOLCE       |
| FGF7      | 2,37E-18 | 0,345447 | 0,987 | 0,992 | 4,54E-14 | 3 | FGF7         |
| PPIC      | 3,06E-18 | 0,358745 | 0,939 | 0,945 | 5,85E-14 | 3 | PPIC         |
| IGBP1     | 4,89E-18 | 0,289353 | 0,958 | 0,957 | 9,34E-14 | 3 | IGBP1        |
| DHRS3     | 8,64E-18 | 0,299725 | 0,949 | 0,962 | 1,65E-13 | 3 | DHRS3        |
| ZNF503    | 1,18E-17 | 0,255658 | 0,723 | 0,63  | 2,27E-13 | 3 | ZNF503       |
| HSPB6     | 1,43E-17 | 0,295694 | 0,881 | 0,842 | 2,73E-13 | 3 | HSPB6        |
| PFDN4     | 2,07E-17 | 0,277609 | 0,955 | 0,966 | 3,96E-13 | 3 | PFDN4        |
| COL5A1    | 2,94E-17 | 0,261725 | 0,871 | 0,843 | 5,63E-13 | 3 | COL5A1       |
| EGR1      | 6,34E-17 | 0,301744 | 0,81  | 0,774 | 1,21E-12 | 3 | EGR1         |
| ISOC1     | 8,15E-17 | 0,31134  | 0,859 | 0,811 | 1,56E-12 | 3 | ISOC1        |
| RAB23     | 1,28E-16 | 0,256689 | 0,817 | 0,77  | 2,45E-12 | 3 | RAB23        |
| SEPW1     | 3,27E-16 | 0,253321 | 0,875 | 0,856 | 6,25E-12 | 3 | SEPW1        |
| LAMB1     | 8,77E-16 | 0,25429  | 0,891 | 0,885 | 1,68E-11 | 3 | LAMB1        |
| PLD3      | 9,94E-16 | 0,283441 | 0,974 | 0,98  | 1,90E-11 | 3 | PLD3         |
| THBS2     | 1,64E-15 | 0,2655   | 0,945 | 0,927 | 3,13E-11 | 3 | THBS2        |
| ADD3      | 2,22E-15 | 0,265426 | 0,801 | 0,785 | 4,24E-11 | 3 | ADD3         |
| MARCKSL1  | 2,63E-15 | 0,293566 | 0,891 | 0,883 | 5,04E-11 | 3 | MARCKSL1     |
| TBX3      | 3,18E-15 | 0,291109 | 0,887 | 0,889 | 6,08E-11 | 3 | TBX3         |
| 07-sep    | 3,65E-15 | 0,281983 | 0,99  | 0,996 | 6,98E-11 | 3 | 07-sep       |
| RARRES1   | 5,14E-15 | 0,287878 | 0,836 | 0,764 | 9,84E-11 | 3 | RARRES1      |
| LAMA4     | 1,25E-14 | 0,261049 | 0,907 | 0,924 | 2,39E-10 | 3 | LAMA4        |
| GABPB1-AS | 1,60E-14 | 0,284615 | 0,804 | 0,772 | 3,07E-10 | 3 | GABPB1-AS1   |
| ITGAV     | 1,66E-14 | 0,275841 | 0,868 | 0,889 | 3,18E-10 | 3 | ITGAV        |
| LAMP2     | 6,73E-14 | 0,268359 | 0,945 | 0,938 | 1,29E-09 | 3 | LAMP2        |

|          |           |          |       |       |           |   |          |
|----------|-----------|----------|-------|-------|-----------|---|----------|
| MMP23B   | 9,70E-14  | 0,26363  | 0,469 | 0,329 | 1,86E-09  | 3 | MMP23B   |
| ZFP36    | 1,14E-13  | 0,278517 | 0,768 | 0,754 | 2,18E-09  | 3 | ZFP36    |
| FOS      | 1,24E-13  | 0,291776 | 0,55  | 0,422 | 2,37E-09  | 3 | FOS      |
| IER2     | 3,88E-13  | 0,30587  | 0,878 | 0,874 | 7,43E-09  | 3 | IER2     |
| TMEM176B | 4,16E-13  | 0,25763  | 0,997 | 0,984 | 7,95E-09  | 3 | TMEM176B |
| HLA-A    | 6,44E-13  | 0,342958 | 1     | 0,999 | 1,23E-08  | 3 | HLA-A    |
| ITM2B    | 1,84E-12  | 0,372172 | 0,99  | 0,993 | 3,51E-08  | 3 | ITM2B    |
| COL15A1  | 2,35E-12  | 0,313875 | 0,617 | 0,531 | 4,50E-08  | 3 | COL15A1  |
| BST2     | 4,76E-12  | 0,342975 | 0,678 | 0,581 | 9,11E-08  | 3 | BST2     |
| CARMN    | 6,79E-12  | 0,284659 | 0,72  | 0,654 | 1,30E-07  | 3 | CARMN    |
| LUM      | 7,01E-12  | 0,465602 | 0,987 | 0,985 | 1,34E-07  | 3 | LUM      |
| SFRP1    | 8,95E-12  | 0,273585 | 0,743 | 0,658 | 1,71E-07  | 3 | SFRP1    |
| MDK      | 3,44E-11  | 0,329207 | 0,977 | 0,988 | 6,58E-07  | 3 | MDK      |
| FBN2     | 3,69E-11  | 0,331006 | 0,797 | 0,765 | 7,06E-07  | 3 | FBN2     |
| PLAC9    | 7,08E-11  | 0,254356 | 0,743 | 0,749 | 1,35E-06  | 3 | PLAC9    |
| GSN      | 2,40E-10  | 0,257686 | 0,936 | 0,942 | 4,60E-06  | 3 | GSN      |
| TIMP1    | 4,48E-10  | 0,551739 | 1     | 1     | 8,56E-06  | 3 | TIMP1    |
| ID2      | 5,30E-10  | 0,281219 | 0,775 | 0,739 | 1,01E-05  | 3 | ID2      |
| LGALS3BP | 7,17E-10  | 0,285359 | 0,968 | 0,964 | 1,37E-05  | 3 | LGALS3BP |
| A2M      | 4,47E-06  | 0,335903 | 0,392 | 0,311 | 0,085465  | 3 | A2M      |
| GREM1    | 8,90E-06  | 0,349656 | 0,804 | 0,767 | 0,170281  | 3 | GREM1    |
| PLAT     | 1,56E-05  | 0,293745 | 0,865 | 0,833 | 0,29859   | 3 | PLAT     |
| FADS1    | 1,91E-112 | 1,221641 | 0,984 | 0,93  | 3,66E-108 | 4 | FADS1    |
| SCD      | 2,18E-105 | 1,128236 | 0,997 | 0,964 | 4,16E-101 | 4 | SCD      |
| NPC21    | 1,46E-102 | 0,771503 | 1     | 0,999 | 2,79E-98  | 4 | NPC2     |
| EIF1     | 6,54E-96  | 0,54928  | 1     | 1     | 1,25E-91  | 4 | EIF1     |
| FDPS     | 1,04E-92  | 1,101278 | 0,994 | 0,975 | 1,99E-88  | 4 | FDPS     |
| FABP3    | 1,57E-91  | 1,36511  | 0,728 | 0,292 | 3,00E-87  | 4 | FABP3    |
| INSIG1   | 9,84E-89  | 0,833326 | 0,974 | 0,859 | 1,88E-84  | 4 | INSIG1   |
| FAM213A  | 3,79E-80  | 0,728324 | 0,984 | 0,934 | 7,25E-76  | 4 | FAM213A  |
| GRN1     | 3,04E-79  | 0,728916 | 1     | 0,99  | 5,82E-75  | 4 | GRN      |
| ASAH1    | 1,66E-77  | 0,690221 | 0,997 | 0,94  | 3,18E-73  | 4 | ASAH1    |
| IDI1     | 2,62E-76  | 0,862776 | 0,961 | 0,886 | 5,01E-72  | 4 | IDI1     |
| NEAT11   | 2,70E-73  | 0,673897 | 1     | 0,999 | 5,17E-69  | 4 | NEAT1    |
| TKT      | 1,79E-72  | 0,756255 | 1     | 0,998 | 3,42E-68  | 4 | TKT      |
| MVD      | 5,49E-72  | 0,682437 | 0,932 | 0,753 | 1,05E-67  | 4 | MVD      |
| HMGCS1   | 1,16E-71  | 0,73664  | 0,874 | 0,611 | 2,22E-67  | 4 | HMGCS1   |
| LPIN1    | 2,91E-68  | 0,554756 | 0,926 | 0,779 | 5,56E-64  | 4 | LPIN1    |
| FDFT1    | 9,59E-66  | 0,62918  | 0,977 | 0,916 | 1,83E-61  | 4 | FDFT1    |
| TMEM176A | 1,36E-65  | 0,794708 | 0,997 | 0,964 | 2,61E-61  | 4 | TMEM176A |
| FBXO32   | 2,12E-65  | 0,671356 | 0,835 | 0,484 | 4,05E-61  | 4 | FBXO32   |
| CTSK1    | 7,14E-63  | 1,060263 | 0,981 | 0,896 | 1,37E-58  | 4 | CTSK     |
| GPNMB1   | 3,07E-62  | 0,692136 | 0,977 | 0,929 | 5,87E-58  | 4 | GPNMB    |
| SQLE     | 7,59E-62  | 0,6885   | 0,984 | 0,922 | 1,45E-57  | 4 | SQLE     |
| UBXN11   | 7,86E-62  | 0,480618 | 1     | 0,992 | 1,50E-57  | 4 | UBXN1    |
| TMEM97   | 1,54E-61  | 0,637211 | 0,828 | 0,549 | 2,94E-57  | 4 | TMEM97   |
| CTSA     | 5,02E-61  | 0,57754  | 1     | 0,988 | 9,60E-57  | 4 | CTSA     |
| ERP291   | 2,68E-60  | 0,48908  | 1     | 0,993 | 5,12E-56  | 4 | ERP29    |
| PSAP1    | 4,12E-60  | 0,510481 | 1     | 0,996 | 7,87E-56  | 4 | PSAP     |
| BTG11    | 1,69E-59  | 0,565339 | 1     | 0,966 | 3,22E-55  | 4 | BTG1     |

|          |          |          |       |       |          |   |          |
|----------|----------|----------|-------|-------|----------|---|----------|
| TMEM176E | 2,38E-59 | 0,715606 | 1     | 0,983 | 4,56E-55 | 4 | TMEM176B |
| CTSD     | 2,78E-56 | 0,471415 | 0,994 | 0,98  | 5,31E-52 | 4 | CTSD     |
| CCNG1    | 6,30E-54 | 0,46315  | 0,994 | 0,983 | 1,21E-49 | 4 | CCNG1    |
| SNHG71   | 3,13E-52 | 0,480719 | 0,997 | 0,978 | 5,99E-48 | 4 | SNHG7    |
| MMP21    | 5,89E-52 | 0,469896 | 1     | 0,991 | 1,13E-47 | 4 | MMP2     |
| MALAT11  | 4,79E-50 | 0,471709 | 1     | 1     | 9,16E-46 | 4 | MALAT1   |
| PTGDS1   | 6,49E-50 | 1,120143 | 0,968 | 0,892 | 1,24E-45 | 4 | PTGDS    |
| HLA-E    | 7,49E-50 | 0,444982 | 0,997 | 0,99  | 1,43E-45 | 4 | HLA-E    |
| ACAT2    | 3,01E-49 | 0,648231 | 0,945 | 0,859 | 5,76E-45 | 4 | ACAT2    |
| FBLN12   | 4,04E-49 | 0,697693 | 1     | 0,991 | 7,73E-45 | 4 | FBLN1    |
| TGFBI1   | 5,99E-49 | 0,547755 | 0,994 | 0,991 | 1,15E-44 | 4 | TGFBI    |
| FASN     | 2,08E-48 | 0,460916 | 0,874 | 0,685 | 3,98E-44 | 4 | FASN     |
| MSMO1    | 7,63E-47 | 0,519841 | 0,922 | 0,791 | 1,46E-42 | 4 | MSMO1    |
| PNRC11   | 1,19E-46 | 0,455082 | 0,994 | 0,957 | 2,27E-42 | 4 | PNRC1    |
| ST13     | 1,62E-46 | 0,370929 | 1     | 0,998 | 3,11E-42 | 4 | ST13     |
| ORAI3    | 2,60E-46 | 0,359128 | 0,883 | 0,672 | 4,97E-42 | 4 | ORAI3    |
| EIF3E1   | 4,11E-46 | 0,349879 | 1     | 0,999 | 7,87E-42 | 4 | EIF3E    |
| CIRBP1   | 9,92E-46 | 0,402135 | 1     | 0,996 | 1,90E-41 | 4 | CIRBP    |
| C1S1     | 2,71E-45 | 0,457966 | 0,997 | 0,985 | 5,19E-41 | 4 | C1S      |
| FADS2    | 1,73E-44 | 0,450968 | 0,977 | 0,927 | 3,31E-40 | 4 | FADS2    |
| LSS      | 2,78E-44 | 0,387259 | 0,913 | 0,756 | 5,31E-40 | 4 | LSS      |
| SEPP11   | 5,76E-44 | 0,600749 | 0,916 | 0,749 | 1,10E-39 | 4 | SEPP1    |
| MMP141   | 3,98E-43 | 0,445358 | 0,981 | 0,95  | 7,61E-39 | 4 | MMP14    |
| GLMP     | 4,52E-43 | 0,385964 | 0,99  | 0,908 | 8,65E-39 | 4 | GLMP     |
| HEXA     | 5,11E-43 | 0,41559  | 0,971 | 0,9   | 9,77E-39 | 4 | HEXA     |
| QPRT     | 8,63E-42 | 0,522256 | 0,977 | 0,871 | 1,65E-37 | 4 | QPRT     |
| NR2F11   | 2,27E-41 | 0,505703 | 0,997 | 0,972 | 4,34E-37 | 4 | NR2F1    |
| PRUNE2   | 5,37E-41 | 0,42953  | 0,748 | 0,482 | 1,03E-36 | 4 | PRUNE2   |
| TPGS1    | 1,64E-40 | 0,374765 | 0,961 | 0,866 | 3,14E-36 | 4 | TPGS1    |
| CAMLG1   | 5,22E-40 | 0,365648 | 0,987 | 0,957 | 9,99E-36 | 4 | CAMLG    |
| ATF4     | 5,82E-39 | 0,406737 | 1     | 0,996 | 1,11E-34 | 4 | ATF4     |
| LDLR     | 7,15E-39 | 0,397266 | 0,955 | 0,861 | 1,37E-34 | 4 | LDLR     |
| NAP1L1   | 4,94E-38 | 0,315328 | 1     | 0,999 | 9,45E-34 | 4 | NAP1L1   |
| IGBP11   | 8,18E-38 | 0,351149 | 0,99  | 0,953 | 1,56E-33 | 4 | IGBP1    |
| PTMA1    | 1,46E-37 | 0,540993 | 1     | 1     | 2,79E-33 | 4 | PTMA     |
| CCNI1    | 1,46E-37 | 0,324129 | 1     | 0,998 | 2,80E-33 | 4 | CCNI     |
| PFDN41   | 2,37E-37 | 0,388105 | 0,987 | 0,962 | 4,54E-33 | 4 | PFDN4    |
| APOE1    | 5,49E-37 | 0,79089  | 0,56  | 0,278 | 1,05E-32 | 4 | APOE     |
| COX4I1   | 7,02E-37 | 0,256686 | 1     | 1     | 1,34E-32 | 4 | COX4I1   |
| SAT11    | 1,04E-36 | 0,47704  | 0,997 | 0,973 | 1,99E-32 | 4 | SAT1     |
| PIK3IP1  | 3,18E-36 | 0,25094  | 0,693 | 0,411 | 6,09E-32 | 4 | PIK3IP1  |
| HMGCR    | 3,87E-36 | 0,316081 | 0,702 | 0,438 | 7,40E-32 | 4 | HMGCR    |
| CYGB     | 9,08E-36 | 0,453155 | 0,945 | 0,851 | 1,74E-31 | 4 | CYGB     |
| NEU1     | 2,40E-35 | 0,409567 | 0,932 | 0,854 | 4,60E-31 | 4 | NEU1     |
| IRF2BP2  | 2,82E-35 | 0,305277 | 0,848 | 0,686 | 5,39E-31 | 4 | IRF2BP2  |
| TPP1     | 4,27E-35 | 0,337673 | 0,964 | 0,91  | 8,17E-31 | 4 | TPP1     |
| RAB131   | 1,54E-34 | 0,340764 | 1     | 0,996 | 2,94E-30 | 4 | RAB13    |
| MMAB     | 1,76E-34 | 0,34824  | 0,935 | 0,868 | 3,37E-30 | 4 | MMAB     |
| B2M2     | 6,18E-34 | 0,320992 | 1     | 1     | 1,18E-29 | 4 | B2M      |
| CTSF1    | 9,03E-34 | 0,316212 | 0,754 | 0,524 | 1,73E-29 | 4 | CTSF     |

|           |          |          |       |       |          |            |
|-----------|----------|----------|-------|-------|----------|------------|
| SCPEP1    | 1,03E-33 | 0,376783 | 0,939 | 0,855 | 1,98E-29 | 4 SCPEP1   |
| PCOLCE1   | 1,49E-33 | 0,509873 | 0,994 | 0,984 | 2,84E-29 | 4 PCOLCE   |
| SMPDL3A1  | 2,43E-33 | 0,39886  | 0,987 | 0,92  | 4,64E-29 | 4 SMPDL3A  |
| NBL11     | 3,26E-33 | 0,390208 | 0,971 | 0,871 | 6,23E-29 | 4 NBL1     |
| MFAP42    | 3,65E-33 | 0,512507 | 0,984 | 0,91  | 6,98E-29 | 4 MFAP4    |
| UQCRB     | 4,53E-33 | 0,267363 | 1     | 1     | 8,67E-29 | 4 UQCRB    |
| GPR137B   | 6,17E-33 | 0,331383 | 0,958 | 0,859 | 1,18E-28 | 4 GPR137B  |
| DHCR7     | 9,40E-33 | 0,390547 | 0,845 | 0,704 | 1,80E-28 | 4 DHCR7    |
| FOXN31    | 2,39E-32 | 0,282778 | 0,828 | 0,641 | 4,57E-28 | 4 FOXN3    |
| C1R1      | 2,48E-32 | 0,483101 | 0,99  | 0,974 | 4,74E-28 | 4 C1R      |
| NUPR1     | 5,65E-32 | 0,33831  | 1     | 1     | 1,08E-27 | 4 NUPR1    |
| VAT1      | 8,57E-32 | 0,331172 | 0,997 | 0,985 | 1,64E-27 | 4 VAT1     |
| VIM1      | 8,78E-32 | 0,36432  | 1     | 1     | 1,68E-27 | 4 VIM      |
| CFD2      | 9,08E-32 | 0,608274 | 0,984 | 0,947 | 1,74E-27 | 4 CFD      |
| SNCA      | 1,58E-31 | 0,424655 | 0,981 | 0,949 | 3,02E-27 | 4 SNCA     |
| CCNB1IP1  | 2,00E-31 | 0,347087 | 0,906 | 0,821 | 3,82E-27 | 4 CCNB1IP1 |
| FN11      | 2,35E-31 | 0,35814  | 1     | 0,996 | 4,49E-27 | 4 FN1      |
| SDCBP     | 2,61E-31 | 0,413727 | 1     | 0,985 | 4,99E-27 | 4 SDCBP    |
| COL14A11  | 2,62E-31 | 0,421203 | 0,955 | 0,827 | 5,01E-27 | 4 COL14A1  |
| RGS101    | 9,25E-31 | 0,339511 | 0,997 | 0,981 | 1,77E-26 | 4 RGS10    |
| HSD17B14  | 1,20E-30 | 0,29949  | 0,796 | 0,58  | 2,30E-26 | 4 HSD17B14 |
| PCBP21    | 2,60E-30 | 0,256077 | 1     | 0,997 | 4,96E-26 | 4 PCBP2    |
| PBX11     | 2,93E-30 | 0,328009 | 0,909 | 0,84  | 5,61E-26 | 4 PBX1     |
| STOM      | 3,94E-30 | 0,338306 | 0,997 | 0,996 | 7,54E-26 | 4 STOM     |
| SYF2      | 4,01E-30 | 0,332628 | 0,994 | 0,956 | 7,68E-26 | 4 SYF2     |
| HLA-B1    | 4,82E-30 | 0,427237 | 1     | 0,999 | 9,23E-26 | 4 HLA-B    |
| MLXIP1    | 6,02E-30 | 0,368621 | 0,977 | 0,935 | 1,15E-25 | 4 MLXIP    |
| LAMP1     | 1,16E-29 | 0,279934 | 0,994 | 0,988 | 2,22E-25 | 4 LAMP1    |
| RARRES22  | 1,39E-29 | 0,593036 | 0,994 | 0,985 | 2,66E-25 | 4 RARRES2  |
| SERPING11 | 2,26E-29 | 0,304776 | 0,906 | 0,758 | 4,32E-25 | 4 SERPING1 |
| PLIN2     | 2,55E-29 | 0,45655  | 0,961 | 0,91  | 4,88E-25 | 4 PLIN2    |
| ANGPTL21  | 8,77E-29 | 0,333729 | 0,935 | 0,846 | 1,68E-24 | 4 ANGPTL2  |
| ELOVL5    | 1,36E-28 | 0,328776 | 0,994 | 0,961 | 2,60E-24 | 4 ELOVL5   |
| HSD17B11  | 1,46E-28 | 0,265585 | 0,841 | 0,679 | 2,79E-24 | 4 HSD17B11 |
| TM7SF2    | 2,76E-28 | 0,33739  | 0,657 | 0,446 | 5,27E-24 | 4 TM7SF2   |
| BAG1      | 8,59E-28 | 0,323443 | 0,932 | 0,881 | 1,64E-23 | 4 BAG1     |
| CYBRD11   | 1,04E-27 | 0,327234 | 0,964 | 0,943 | 2,00E-23 | 4 CYBRD1   |
| PBX31     | 1,12E-27 | 0,351109 | 0,919 | 0,833 | 2,15E-23 | 4 PBX3     |
| EIF4B1    | 2,10E-27 | 0,265324 | 0,997 | 0,994 | 4,01E-23 | 4 EIF4B    |
| PERP      | 2,32E-27 | 0,295342 | 1     | 0,997 | 4,43E-23 | 4 PERP     |
| ZFP36L11  | 2,96E-27 | 0,353362 | 0,994 | 0,968 | 5,66E-23 | 4 ZFP36L1  |
| MGP1      | 3,07E-27 | 0,532436 | 0,929 | 0,822 | 5,86E-23 | 4 MGP      |
| BBC3      | 5,58E-27 | 0,26265  | 0,761 | 0,543 | 1,07E-22 | 4 BBC3     |
| GLUL      | 1,35E-26 | 0,28088  | 0,819 | 0,718 | 2,58E-22 | 4 GLUL     |
| SPON2     | 2,42E-26 | 0,463932 | 1     | 0,997 | 4,63E-22 | 4 SPON2    |
| LAMP21    | 6,29E-26 | 0,341775 | 0,964 | 0,935 | 1,20E-21 | 4 LAMP2    |
| CEBPB     | 1,08E-25 | 0,291552 | 0,997 | 0,984 | 2,07E-21 | 4 CEBPB    |
| TXNIP1    | 1,46E-25 | 0,36849  | 0,958 | 0,907 | 2,79E-21 | 4 TXNIP    |
| ACLY      | 2,66E-25 | 0,352717 | 0,922 | 0,844 | 5,08E-21 | 4 ACLY     |
| UBC       | 2,74E-25 | 0,265977 | 1     | 1     | 5,24E-21 | 4 UBC      |



|           |          |          |       |       |          |                |
|-----------|----------|----------|-------|-------|----------|----------------|
| HTRA11    | 6,98E-25 | 0,277323 | 0,845 | 0,71  | 1,33E-20 | 4 HTRA1        |
| SERPINF11 | 7,42E-25 | 0,378136 | 0,919 | 0,821 | 1,42E-20 | 4 SERPINF1     |
| ZNF106    | 7,93E-25 | 0,320658 | 0,977 | 0,952 | 1,52E-20 | 4 ZNF106       |
| TRAPPC6A  | 1,93E-24 | 0,26281  | 0,783 | 0,635 | 3,68E-20 | 4 TRAPPC6A     |
| SC5D      | 1,99E-24 | 0,27573  | 0,77  | 0,645 | 3,81E-20 | 4 SC5D         |
| TGM2      | 3,49E-24 | 0,470619 | 1     | 0,986 | 6,67E-20 | 4 TGM2         |
| BNIP3L    | 4,10E-24 | 0,282638 | 0,997 | 0,978 | 7,84E-20 | 4 BNIP3L       |
| HLA-A1    | 9,10E-24 | 0,389191 | 1     | 0,999 | 1,74E-19 | 4 HLA-A        |
| COL6A21   | 1,01E-23 | 0,276978 | 1     | 0,998 | 1,92E-19 | 4 COL6A2       |
| AMDHD2    | 1,01E-23 | 0,255795 | 0,812 | 0,666 | 1,94E-19 | 4 AMDHD2       |
| ZNF581    | 4,04E-23 | 0,26068  | 0,89  | 0,799 | 7,73E-19 | 4 ZNF581       |
| FAM210B   | 5,50E-23 | 0,28989  | 0,916 | 0,853 | 1,05E-18 | 4 FAM210B      |
| CST31     | 8,82E-23 | 0,27795  | 1     | 0,999 | 1,69E-18 | 4 CST3         |
| JUNB1     | 8,88E-23 | 0,347716 | 0,951 | 0,915 | 1,70E-18 | 4 JUNB         |
| H3F3A1    | 1,04E-22 | 0,252173 | 1     | 1     | 1,98E-18 | 4 H3F3A        |
| TIMP21    | 3,70E-22 | 0,323838 | 1     | 0,99  | 7,07E-18 | 4 TIMP2        |
| C6orf481  | 4,84E-22 | 0,265998 | 1     | 0,995 | 9,26E-18 | 4 C6orf48      |
| HLA-C     | 7,46E-22 | 0,282653 | 1     | 0,999 | 1,43E-17 | 4 HLA-C        |
| C10orf10  | 1,02E-21 | 0,429542 | 0,641 | 0,439 | 1,95E-17 | 4 C10orf10     |
| DPP7      | 1,22E-21 | 0,253126 | 0,981 | 0,974 | 2,34E-17 | 4 DPP7         |
| MYO61     | 1,68E-21 | 0,264242 | 0,929 | 0,82  | 3,21E-17 | 4 MYO6         |
| EDNRB     | 6,16E-21 | 0,266254 | 0,715 | 0,522 | 1,18E-16 | 4 EDNRB        |
| HCFC1R11  | 1,07E-20 | 0,268511 | 0,964 | 0,901 | 2,04E-16 | 4 HCFC1R1      |
| SERPINB6  | 2,29E-20 | 0,293352 | 0,968 | 0,952 | 4,38E-16 | 4 SERPINB6     |
| EPB41L4A- | 2,71E-20 | 0,256024 | 0,955 | 0,925 | 5,17E-16 | 4 EPB41L4A-AS1 |
| PLPP11    | 4,60E-20 | 0,271943 | 0,916 | 0,84  | 8,79E-16 | 4 PLPP1        |
| ID3       | 4,88E-20 | 0,523733 | 0,977 | 0,93  | 9,32E-16 | 4 ID3          |
| LITAF     | 5,87E-20 | 0,271343 | 0,987 | 0,975 | 1,12E-15 | 4 LITAF        |
| C14orf1   | 1,35E-19 | 0,304865 | 0,948 | 0,893 | 2,57E-15 | 4 C14orf1      |
| SOX41     | 1,43E-19 | 0,357462 | 0,984 | 0,92  | 2,73E-15 | 4 SOX4         |
| WBP2      | 2,57E-19 | 0,257779 | 0,906 | 0,829 | 4,92E-15 | 4 WBP2         |
| ALDH2     | 4,13E-19 | 0,269385 | 0,929 | 0,874 | 7,89E-15 | 4 ALDH2        |
| ADH5      | 5,64E-19 | 0,270322 | 1     | 0,99  | 1,08E-14 | 4 ADH5         |
| FCGRT1    | 6,07E-19 | 0,26071  | 0,984 | 0,964 | 1,16E-14 | 4 FCGRT        |
| SOD2      | 8,01E-19 | 0,465692 | 0,984 | 0,97  | 1,53E-14 | 4 SOD2         |
| CD9       | 8,10E-19 | 0,30212  | 0,984 | 0,951 | 1,55E-14 | 4 CD9          |
| ZFP36L21  | 1,08E-18 | 0,332648 | 0,981 | 0,966 | 2,07E-14 | 4 ZFP36L2      |
| RARRES32  | 1,19E-18 | 0,312891 | 0,981 | 0,948 | 2,27E-14 | 4 RARRES3      |
| TCF21     | 1,24E-18 | 0,298651 | 0,961 | 0,941 | 2,37E-14 | 4 TCF21        |
| ITM2B1    | 2,31E-18 | 0,276149 | 0,997 | 0,992 | 4,42E-14 | 4 ITM2B        |
| CSRP2     | 2,40E-18 | 0,354811 | 0,883 | 0,816 | 4,58E-14 | 4 CSRP2        |
| LUM1      | 3,64E-18 | 0,385671 | 1     | 0,984 | 6,95E-14 | 4 LUM          |
| PTN1      | 6,22E-18 | 0,294176 | 1     | 0,993 | 1,19E-13 | 4 PTN          |
| AKAP121   | 7,56E-18 | 0,284431 | 0,994 | 0,977 | 1,45E-13 | 4 AKAP12       |
| EBP       | 1,57E-17 | 0,321478 | 0,77  | 0,661 | 3,00E-13 | 4 EBP          |
| CDKN1A    | 2,63E-17 | 0,378086 | 0,994 | 0,968 | 5,03E-13 | 4 CDKN1A       |
| MAP1B     | 3,00E-17 | 0,275679 | 0,997 | 0,991 | 5,73E-13 | 4 MAP1B        |
| NAMPT     | 1,94E-16 | 0,254827 | 0,9   | 0,864 | 3,71E-12 | 4 NAMPT        |
| JUND      | 3,51E-16 | 0,250492 | 0,841 | 0,776 | 6,72E-12 | 4 JUND         |
| HSD17B12  | 1,07E-15 | 0,266504 | 0,896 | 0,86  | 2,05E-11 | 4 HSD17B12     |

|          |          |          |       |       |          |            |
|----------|----------|----------|-------|-------|----------|------------|
| DDIT4    | 1,16E-15 | 0,314796 | 0,903 | 0,825 | 2,22E-11 | 4 DDIT4    |
| LGALS3   | 1,87E-15 | 0,278    | 1     | 0,999 | 3,57E-11 | 4 LGALS3   |
| RBP12    | 2,47E-15 | 0,327122 | 0,89  | 0,849 | 4,72E-11 | 4 RBP1     |
| CD63     | 1,56E-14 | 0,258917 | 1     | 1     | 2,99E-10 | 4 CD63     |
| GPX31    | 1,97E-14 | 0,314629 | 0,738 | 0,592 | 3,76E-10 | 4 GPX3     |
| BDKRB2   | 2,20E-14 | 0,26994  | 0,951 | 0,903 | 4,21E-10 | 4 BDKRB2   |
| PRRX1    | 1,24E-12 | 0,262493 | 0,777 | 0,682 | 2,36E-08 | 4 PRRX1    |
| PDPN     | 3,64E-12 | 0,251958 | 0,893 | 0,856 | 6,96E-08 | 4 PDPN     |
| PKM      | 1,29E-72 | 0,694247 | 1     | 0,999 | 2,46E-68 | 5 PKM      |
| NQO1     | 3,06E-59 | 0,69316  | 1     | 0,989 | 5,84E-55 | 5 NQO1     |
| PRDX1    | 2,72E-57 | 0,542381 | 1     | 1     | 5,20E-53 | 5 PRDX1    |
| PTGR1    | 8,00E-57 | 0,673065 | 0,993 | 0,971 | 1,53E-52 | 5 PTGR1    |
| GAPDH    | 4,22E-54 | 0,358612 | 1     | 1     | 8,07E-50 | 5 GAPDH    |
| ANXA2    | 6,80E-48 | 0,400166 | 1     | 1     | 1,30E-43 | 5 ANXA2    |
| ALDOA    | 1,00E-46 | 0,349611 | 1     | 1     | 1,92E-42 | 5 ALDOA    |
| G6PD     | 9,86E-46 | 0,420984 | 0,997 | 0,985 | 1,89E-41 | 5 G6PD     |
| LMNA     | 2,69E-45 | 0,41888  | 1     | 0,998 | 5,15E-41 | 5 LMNA     |
| ENO1     | 1,57E-44 | 0,435061 | 1     | 0,998 | 3,00E-40 | 5 ENO1     |
| CALR     | 2,35E-42 | 0,460124 | 1     | 0,998 | 4,49E-38 | 5 CALR     |
| PSMB1    | 6,16E-40 | 0,388958 | 0,997 | 0,995 | 1,18E-35 | 5 PSMB1    |
| PPIB     | 9,27E-40 | 0,383356 | 1     | 1     | 1,77E-35 | 5 PPIB     |
| GSTP1    | 3,93E-39 | 0,356701 | 1     | 0,999 | 7,52E-35 | 5 GSTP1    |
| TPI1     | 1,04E-37 | 0,345518 | 1     | 0,995 | 1,99E-33 | 5 TPI1     |
| MGST1    | 1,26E-37 | 0,324059 | 1     | 1     | 2,42E-33 | 5 MGST1    |
| PDIA6    | 1,43E-37 | 0,379119 | 0,993 | 0,974 | 2,73E-33 | 5 PDIA6    |
| HNRNPA1  | 3,62E-37 | 0,390037 | 1     | 0,999 | 6,92E-33 | 5 HNRNPA1  |
| KIAA0101 | 1,21E-36 | 0,280006 | 0,759 | 0,387 | 2,31E-32 | 5 KIAA0101 |
| CD99     | 1,61E-36 | 0,291462 | 1     | 0,998 | 3,09E-32 | 5 CD99     |
| S100A11  | 7,77E-36 | 0,308985 | 1     | 1     | 1,49E-31 | 5 S100A11  |
| CD631    | 6,18E-35 | 0,371061 | 1     | 1     | 1,18E-30 | 5 CD63     |
| COPS6    | 1,76E-34 | 0,367296 | 0,993 | 0,972 | 3,37E-30 | 5 COPS6    |
| EIF3I    | 5,36E-34 | 0,322091 | 0,997 | 0,991 | 1,02E-29 | 5 EIF3I    |
| ATP5G3   | 1,24E-33 | 0,331447 | 1     | 0,997 | 2,37E-29 | 5 ATP5G3   |
| SKP1     | 2,79E-33 | 0,314195 | 0,997 | 0,999 | 5,34E-29 | 5 SKP1     |
| PRDX4    | 1,66E-32 | 0,340941 | 0,986 | 0,947 | 3,18E-28 | 5 PRDX4    |
| NNMT     | 4,13E-31 | 0,395779 | 1     | 0,995 | 7,89E-27 | 5 NNMT     |
| NPM1     | 1,04E-30 | 0,314304 | 1     | 1     | 1,98E-26 | 5 NPM1     |
| LDHA     | 2,44E-30 | 0,349128 | 1     | 0,992 | 4,66E-26 | 5 LDHA     |
| HSPA5    | 3,32E-30 | 0,35711  | 1     | 0,974 | 6,35E-26 | 5 HSPA5    |
| ANXA1    | 5,82E-30 | 0,338063 | 1     | 0,992 | 1,11E-25 | 5 ANXA1    |
| NDUFB8   | 1,74E-29 | 0,299829 | 0,993 | 0,987 | 3,32E-25 | 5 NDUFB8   |
| ETFB     | 1,11E-28 | 0,298491 | 0,979 | 0,951 | 2,12E-24 | 5 ETFB     |
| AKR1B1   | 1,20E-28 | 0,372228 | 0,997 | 0,976 | 2,30E-24 | 5 AKR1B1   |
| AP2M1    | 3,02E-28 | 0,271794 | 1     | 0,998 | 5,78E-24 | 5 AP2M1    |
| COPE     | 3,34E-28 | 0,278023 | 1     | 0,995 | 6,39E-24 | 5 COPE     |
| ARPC3    | 5,88E-28 | 0,275216 | 1     | 0,996 | 1,12E-23 | 5 ARPC3    |
| PSMD8    | 5,90E-28 | 0,299135 | 1     | 0,993 | 1,13E-23 | 5 PSMD8    |
| PSMB6    | 8,76E-28 | 0,309112 | 0,993 | 0,982 | 1,68E-23 | 5 PSMB6    |
| PRDX2    | 1,34E-27 | 0,293237 | 0,997 | 0,984 | 2,57E-23 | 5 PRDX2    |
| PLIN3    | 1,58E-27 | 0,294792 | 0,972 | 0,925 | 3,02E-23 | 5 PLIN3    |

|          |          |          |       |       |          |            |
|----------|----------|----------|-------|-------|----------|------------|
| IFITM21  | 1,62E-27 | 0,340647 | 1     | 0,996 | 3,09E-23 | 5 IFITM2   |
| RPS27L   | 9,56E-27 | 0,275691 | 1     | 1     | 1,83E-22 | 5 RPS27L   |
| TMBIM6   | 1,47E-26 | 0,251203 | 0,997 | 0,992 | 2,82E-22 | 5 TMBIM6   |
| CLIC1    | 1,60E-26 | 0,278617 | 1     | 0,999 | 3,06E-22 | 5 CLIC1    |
| ARPC1B   | 2,36E-26 | 0,300933 | 0,997 | 0,996 | 4,52E-22 | 5 ARPC1B   |
| SQSTM1   | 2,48E-26 | 0,284586 | 1     | 1     | 4,74E-22 | 5 SQSTM1   |
| DDOST    | 2,71E-26 | 0,302188 | 0,99  | 0,946 | 5,19E-22 | 5 DDOST    |
| NDUFV2   | 8,25E-26 | 0,271953 | 0,99  | 0,988 | 1,58E-21 | 5 NDUFV2   |
| ECM1     | 1,03E-25 | 0,293521 | 0,917 | 0,767 | 1,97E-21 | 5 ECM1     |
| PSMA7    | 1,11E-25 | 0,277497 | 1     | 0,999 | 2,11E-21 | 5 PSMA7    |
| MRPL28   | 2,34E-25 | 0,27111  | 0,972 | 0,905 | 4,48E-21 | 5 MRPL28   |
| CHMP2A   | 7,80E-25 | 0,268448 | 0,997 | 0,985 | 1,49E-20 | 5 CHMP2A   |
| PDIA3    | 9,05E-25 | 0,253228 | 0,993 | 0,972 | 1,73E-20 | 5 PDIA3    |
| TMED9    | 2,26E-24 | 0,267329 | 0,997 | 0,987 | 4,31E-20 | 5 TMED9    |
| UQCRC1   | 4,54E-24 | 0,259859 | 0,983 | 0,949 | 8,67E-20 | 5 UQCRC1   |
| ANXA11   | 4,74E-24 | 0,274793 | 0,997 | 0,992 | 9,07E-20 | 5 ANXA11   |
| SDHC     | 6,10E-24 | 0,25068  | 0,993 | 0,983 | 1,17E-19 | 5 SDHC     |
| SCAND1   | 6,36E-24 | 0,255702 | 0,997 | 0,991 | 1,22E-19 | 5 SCAND1   |
| LMAN2    | 8,62E-24 | 0,266076 | 0,99  | 0,972 | 1,65E-19 | 5 LMAN2    |
| PRKCDBP  | 2,43E-23 | 0,308206 | 1     | 0,994 | 4,65E-19 | 5 PRKCDBP  |
| TKT1     | 2,45E-23 | 0,343391 | 0,997 | 0,998 | 4,69E-19 | 5 TKT      |
| EBPL     | 2,68E-23 | 0,285355 | 0,969 | 0,931 | 5,12E-19 | 5 EBPL     |
| MDH2     | 3,64E-23 | 0,255362 | 0,997 | 0,985 | 6,96E-19 | 5 MDH2     |
| NANS     | 7,90E-23 | 0,252867 | 0,931 | 0,842 | 1,51E-18 | 5 NANS     |
| TALDO1   | 1,23E-22 | 0,288865 | 1     | 0,997 | 2,36E-18 | 5 TALDO1   |
| SRSF3    | 1,89E-22 | 0,295207 | 0,997 | 0,975 | 3,62E-18 | 5 SRSF3    |
| UCHL1    | 2,63E-22 | 0,258082 | 1     | 0,999 | 5,03E-18 | 5 UCHL1    |
| HLA-C1   | 3,03E-22 | 0,287319 | 1     | 0,999 | 5,80E-18 | 5 HLA-C    |
| TECR     | 6,40E-22 | 0,274249 | 0,928 | 0,867 | 1,22E-17 | 5 TECR     |
| MGST3    | 7,04E-22 | 0,256611 | 1     | 0,996 | 1,35E-17 | 5 MGST3    |
| MXRA8    | 7,33E-22 | 0,251502 | 0,993 | 0,972 | 1,40E-17 | 5 MXRA8    |
| ATP5C1   | 1,47E-21 | 0,256274 | 0,983 | 0,984 | 2,81E-17 | 5 ATP5C1   |
| MYDGF1   | 2,93E-21 | 0,274964 | 0,997 | 0,997 | 5,60E-17 | 5 MYDGF    |
| RPL22L11 | 3,43E-21 | 0,340372 | 0,986 | 0,972 | 6,55E-17 | 5 RPL22L1  |
| FHL21    | 3,63E-21 | 0,290909 | 1     | 0,996 | 6,94E-17 | 5 FHL2     |
| MT1E1    | 3,89E-21 | 0,274769 | 0,976 | 0,962 | 7,44E-17 | 5 MT1E     |
| PHGDH    | 5,37E-21 | 0,272629 | 0,966 | 0,9   | 1,03E-16 | 5 PHGDH    |
| YWHAE    | 1,17E-20 | 0,259732 | 1     | 0,995 | 2,23E-16 | 5 YWHAE    |
| SRSF2    | 1,23E-20 | 0,262307 | 0,979 | 0,952 | 2,35E-16 | 5 SRSF2    |
| REXO2    | 3,55E-20 | 0,257288 | 0,993 | 0,995 | 6,78E-16 | 5 REXO2    |
| APOBEC3C | 6,56E-20 | 0,308422 | 0,917 | 0,827 | 1,25E-15 | 5 APOBEC3C |
| BASP1    | 2,05E-19 | 0,302007 | 0,983 | 0,99  | 3,91E-15 | 5 BASP1    |
| KRT181   | 3,29E-19 | 0,428037 | 0,876 | 0,77  | 6,29E-15 | 5 KRT18    |
| SERPINH1 | 9,40E-19 | 0,252007 | 0,997 | 0,985 | 1,80E-14 | 5 SERPINH1 |
| S100A10  | 2,09E-18 | 0,2522   | 0,997 | 0,997 | 4,00E-14 | 5 S100A10  |
| PITX1    | 1,46E-17 | 0,417322 | 0,986 | 0,987 | 2,78E-13 | 5 PITX1    |
| ALDH1A1  | 2,28E-17 | 0,446544 | 0,993 | 0,991 | 4,37E-13 | 5 ALDH1A1  |
| EIF5A    | 6,05E-17 | 0,333575 | 0,952 | 0,893 | 1,16E-12 | 5 EIF5A    |
| GLRX1    | 1,59E-16 | 0,307622 | 1     | 0,993 | 3,03E-12 | 5 GLRX     |
| IGFBP6   | 2,47E-16 | 0,319108 | 0,997 | 0,993 | 4,73E-12 | 5 IGFBP6   |

|           |          |          |       |       |          |               |
|-----------|----------|----------|-------|-------|----------|---------------|
| LXN1      | 4,65E-15 | 0,355096 | 0,979 | 0,935 | 8,89E-11 | 5 LXN         |
| VIM2      | 1,58E-14 | 0,263641 | 1     | 1     | 3,02E-10 | 5 VIM         |
| CLDN11    | 6,93E-14 | 0,557472 | 1     | 0,999 | 1,32E-09 | 5 CLDN11      |
| AXL       | 6,17E-13 | 0,364912 | 0,962 | 0,925 | 1,18E-08 | 5 AXL         |
| CTSC      | 7,04E-13 | 0,28135  | 1     | 0,999 | 1,35E-08 | 5 CTSC        |
| TCF211    | 7,36E-13 | 0,260259 | 0,969 | 0,94  | 1,41E-08 | 5 TCF21       |
| CDC42     | 2,19E-12 | 0,269573 | 0,99  | 0,985 | 4,19E-08 | 5 CDC42       |
| GDF15     | 2,40E-12 | 0,452249 | 0,907 | 0,842 | 4,59E-08 | 5 GDF15       |
| CEBPD     | 4,30E-12 | 0,255927 | 0,997 | 0,98  | 8,23E-08 | 5 CEBPD       |
| SPON21    | 1,91E-11 | 0,266632 | 1     | 0,997 | 3,66E-07 | 5 SPON2       |
| LRRC75A   | 1,20E-10 | 0,44621  | 0,697 | 0,607 | 2,29E-06 | 5 LRRC75A     |
| CITED21   | 5,62E-10 | 0,298962 | 0,966 | 0,938 | 1,07E-05 | 5 CITED2      |
| SDC4      | 6,50E-09 | 0,359358 | 0,921 | 0,888 | 0,000124 | 5 SDC4        |
| ADIRF     | 7,24E-07 | 0,264095 | 0,941 | 0,921 | 0,013844 | 5 ADIRF       |
| CTNNB1    | 8,09E-06 | 0,256582 | 0,793 | 0,771 | 0,154732 | 5 CTNNB1      |
| ATP5E     | 8,26E-71 | 0,432805 | 1     | 1     | 1,58E-66 | 6 ATP5E       |
| OST4      | 5,93E-68 | 0,516243 | 1     | 1     | 1,13E-63 | 6 OST4        |
| SERF2     | 5,06E-64 | 0,384527 | 1     | 1     | 9,67E-60 | 6 SERF2       |
| RPS28     | 4,94E-56 | 0,287637 | 1     | 1     | 9,45E-52 | 6 RPS28       |
| FTH1      | 3,10E-55 | 0,492292 | 1     | 1     | 5,93E-51 | 6 FTH1        |
| FTL2      | 3,11E-55 | 0,55747  | 1     | 1     | 5,94E-51 | 6 FTL         |
| CRIM1     | 1,09E-54 | 0,480625 | 0,996 | 0,864 | 2,08E-50 | 6 CRIM1       |
| MT-ND4    | 1,45E-54 | 0,411644 | 1     | 1     | 2,77E-50 | 6 MT-ND4      |
| POLR2L    | 8,83E-53 | 0,503948 | 1     | 0,999 | 1,69E-48 | 6 POLR2L      |
| RPL39     | 1,59E-52 | 0,28788  | 1     | 1     | 3,03E-48 | 6 RPL39       |
| LINC00152 | 7,95E-50 | 0,509318 | 1     | 0,986 | 1,52E-45 | 6 LINC00152   |
| TMSB10    | 3,21E-48 | 0,34953  | 1     | 1     | 6,14E-44 | 6 TMSB10      |
| EXT11     | 6,89E-47 | 0,467774 | 0,993 | 0,933 | 1,32E-42 | 6 EXT1        |
| RPS29     | 7,17E-45 | 0,262038 | 1     | 1     | 1,37E-40 | 6 RPS29       |
| TMSB4X    | 8,86E-41 | 0,425407 | 1     | 1     | 1,69E-36 | 6 TMSB4X      |
| RPL34     | 1,18E-40 | 0,257838 | 1     | 1     | 2,27E-36 | 6 RPL34       |
| ITGAE     | 3,61E-40 | 0,415352 | 0,993 | 0,958 | 6,90E-36 | 6 ITGAE       |
| CAMK2N1   | 1,55E-39 | 0,424139 | 1     | 0,991 | 2,97E-35 | 6 CAMK2N1     |
| MIR4435-2 | 2,31E-39 | 0,409329 | 0,993 | 0,951 | 4,42E-35 | 6 MIR4435-2HG |
| OPN31     | 1,76E-38 | 0,461323 | 0,914 | 0,666 | 3,37E-34 | 6 OPN3        |
| TOMM7     | 2,29E-38 | 0,285152 | 1     | 0,999 | 4,38E-34 | 6 TOMM7       |
| MT-CO2    | 3,68E-38 | 0,339895 | 1     | 1     | 7,04E-34 | 6 MT-CO2      |
| PPDPF     | 4,24E-38 | 0,339422 | 1     | 0,999 | 8,11E-34 | 6 PPDPF       |
| MGAT5     | 4,49E-38 | 0,281482 | 0,721 | 0,367 | 8,59E-34 | 6 MGAT5       |
| ZFAND51   | 4,65E-38 | 0,479898 | 0,996 | 0,984 | 8,89E-34 | 6 ZFAND5      |
| USMG51    | 6,18E-38 | 0,360555 | 0,996 | 0,997 | 1,18E-33 | 6 USMG5       |
| MPC21     | 1,26E-37 | 0,401923 | 0,996 | 0,987 | 2,41E-33 | 6 MPC2        |
| TMEM47    | 1,27E-37 | 0,462867 | 0,955 | 0,827 | 2,44E-33 | 6 TMEM47      |
| PAPSS21   | 8,80E-37 | 0,422316 | 0,989 | 0,916 | 1,68E-32 | 6 PAPSS2      |
| MT-CO1    | 5,89E-36 | 0,27904  | 1     | 1     | 1,13E-31 | 6 MT-CO1      |
| NABP1     | 2,92E-35 | 0,48963  | 0,996 | 0,971 | 5,59E-31 | 6 NABP1       |
| WNT5A     | 3,07E-35 | 0,424672 | 0,955 | 0,805 | 5,87E-31 | 6 WNT5A       |
| TMA7      | 1,84E-34 | 0,292733 | 1     | 0,999 | 3,52E-30 | 6 TMA7        |
| IGFBP51   | 9,05E-34 | 0,759728 | 1     | 1     | 1,73E-29 | 6 IGFBP5      |
| GNG12     | 1,95E-33 | 0,341082 | 1     | 0,973 | 3,72E-29 | 6 GNG12       |

|               |          |          |       |       |          |                 |
|---------------|----------|----------|-------|-------|----------|-----------------|
| COMMD6        | 9,00E-33 | 0,306053 | 1     | 0,996 | 1,72E-28 | 6 COMMD6        |
| HEG1          | 1,12E-32 | 0,402092 | 0,989 | 0,933 | 2,13E-28 | 6 HEG1          |
| ATP13A3       | 1,71E-32 | 0,311579 | 0,929 | 0,756 | 3,26E-28 | 6 ATP13A3       |
| MYEOV2        | 1,43E-30 | 0,28939  | 1     | 0,992 | 2,74E-26 | 6 MYEOV2        |
| SULF11        | 1,49E-30 | 0,477349 | 0,892 | 0,714 | 2,86E-26 | 6 SULF1         |
| PXDN          | 2,42E-30 | 0,325488 | 0,981 | 0,945 | 4,62E-26 | 6 PXDN          |
| ADAMTS5       | 3,58E-30 | 0,419251 | 0,926 | 0,716 | 6,85E-26 | 6 ADAMTS5       |
| TMTC1         | 4,72E-30 | 0,34027  | 0,929 | 0,803 | 9,02E-26 | 6 TMTC1         |
| STAT11        | 5,05E-30 | 0,340269 | 0,993 | 0,946 | 9,65E-26 | 6 STAT1         |
| MT-ND1        | 5,63E-30 | 0,300097 | 1     | 0,999 | 1,08E-25 | 6 MT-ND1        |
| NEDD8         | 6,74E-30 | 0,298314 | 1     | 0,999 | 1,29E-25 | 6 NEDD8         |
| C17orf89      | 9,94E-30 | 0,358532 | 0,989 | 0,986 | 1,90E-25 | 6 C17orf89      |
| PRNP          | 2,42E-29 | 0,50981  | 0,989 | 0,98  | 4,63E-25 | 6 PRNP          |
| GUK1          | 3,73E-29 | 0,317005 | 1     | 0,998 | 7,13E-25 | 6 GUK1          |
| PAPPA1        | 8,42E-29 | 0,492426 | 0,941 | 0,758 | 1,61E-24 | 6 PAPPA         |
| MT-ND5        | 1,07E-28 | 0,298065 | 1     | 0,998 | 2,05E-24 | 6 MT-ND5        |
| YWHAG         | 3,11E-28 | 0,297857 | 0,978 | 0,882 | 5,95E-24 | 6 YWHAG         |
| LINC01420     | 5,17E-28 | 0,292152 | 0,993 | 0,956 | 9,88E-24 | 6 LINC01420     |
| FSTL1         | 5,56E-28 | 0,390232 | 1     | 0,994 | 1,06E-23 | 6 FSTL1         |
| GPRC5A1       | 3,00E-27 | 0,402712 | 0,955 | 0,853 | 5,74E-23 | 6 GPRC5A        |
| DDAH1         | 3,31E-27 | 0,315596 | 0,9   | 0,709 | 6,34E-23 | 6 DDAH1         |
| SMURF21       | 3,43E-27 | 0,416174 | 0,967 | 0,827 | 6,55E-23 | 6 SMURF2        |
| TNS3          | 6,06E-27 | 0,322135 | 0,929 | 0,803 | 1,16E-22 | 6 TNS3          |
| ATOX1         | 6,43E-27 | 0,331137 | 0,996 | 0,996 | 1,23E-22 | 6 ATOX1         |
| NME4          | 7,39E-27 | 0,296522 | 0,993 | 0,992 | 1,41E-22 | 6 NME4          |
| ELL2          | 1,03E-26 | 0,280335 | 0,952 | 0,799 | 1,96E-22 | 6 ELL2          |
| USP531        | 1,63E-26 | 0,413857 | 0,941 | 0,789 | 3,11E-22 | 6 USP53         |
| MMP24-AS      | 2,14E-26 | 0,28754  | 0,993 | 0,99  | 4,10E-22 | 6 MMP24-AS1     |
| C7orf731      | 2,27E-26 | 0,28186  | 0,996 | 0,98  | 4,34E-22 | 6 C7orf73       |
| GJA1          | 3,40E-26 | 0,330922 | 0,97  | 0,83  | 6,49E-22 | 6 GJA1          |
| LAMC1         | 5,98E-26 | 0,292508 | 0,981 | 0,955 | 1,14E-21 | 6 LAMC1         |
| TLK1          | 8,31E-26 | 0,292896 | 0,963 | 0,83  | 1,59E-21 | 6 TLK1          |
| IGFBP31       | 1,61E-25 | 0,565534 | 0,952 | 0,759 | 3,08E-21 | 6 IGFBP3        |
| TXNRD11       | 1,64E-25 | 0,33801  | 1     | 0,997 | 3,15E-21 | 6 TXNRD1        |
| GABARAPL      | 6,43E-25 | 0,385873 | 0,963 | 0,944 | 1,23E-20 | 6 GABARAPL1     |
| SLC7A111      | 7,05E-25 | 0,333367 | 0,948 | 0,806 | 1,35E-20 | 6 SLC7A11       |
| RP11-356J5.12 | 1,26E-24 | 0,256498 | 0,937 | 0,775 | 2,41E-20 | 6 RP11-356J5.12 |
| SLC40A1       | 1,38E-24 | 0,429277 | 0,825 | 0,591 | 2,64E-20 | 6 SLC40A1       |
| RND31         | 1,48E-24 | 0,342111 | 1     | 0,997 | 2,83E-20 | 6 RND3          |
| CEMIP1        | 2,58E-24 | 0,503781 | 0,926 | 0,756 | 4,94E-20 | 6 CEMIP         |
| ATP6V1A       | 2,62E-24 | 0,280686 | 0,948 | 0,816 | 5,00E-20 | 6 ATP6V1A       |
| LASP1         | 2,64E-24 | 0,323594 | 0,97  | 0,934 | 5,06E-20 | 6 LASP1         |
| C9orf16       | 2,97E-24 | 0,268998 | 1     | 0,988 | 5,68E-20 | 6 C9orf16       |
| SBF2-AS11     | 4,47E-24 | 0,43272  | 0,993 | 0,944 | 8,56E-20 | 6 SBF2-AS1      |
| LMO71         | 6,13E-24 | 0,288596 | 0,985 | 0,945 | 1,17E-19 | 6 LMO7          |
| COX14         | 1,50E-23 | 0,272576 | 0,996 | 0,98  | 2,88E-19 | 6 COX14         |
| NGFRAP1       | 2,76E-23 | 0,311341 | 1     | 0,999 | 5,29E-19 | 6 NGFRAP1       |
| IGF2          | 3,68E-23 | 0,357947 | 1     | 0,977 | 7,03E-19 | 6 IGF2          |
| LMO7-AS1      | 5,75E-23 | 0,281603 | 0,907 | 0,786 | 1,10E-18 | 6 LMO7-AS1      |
| UBL5          | 1,48E-22 | 0,274703 | 1     | 0,999 | 2,84E-18 | 6 UBL5          |

|          |           |          |       |       |           |            |
|----------|-----------|----------|-------|-------|-----------|------------|
| VGLL3    | 4,16E-22  | 0,257157 | 0,929 | 0,788 | 7,95E-18  | 6 VGLL3    |
| COX17    | 4,23E-22  | 0,280619 | 0,948 | 0,887 | 8,08E-18  | 6 COX17    |
| ZFAS1    | 1,22E-21  | 0,252048 | 1     | 0,998 | 2,32E-17  | 6 ZFAS1    |
| PDE5A    | 2,29E-21  | 0,328023 | 0,996 | 0,954 | 4,37E-17  | 6 PDE5A    |
| RDH10    | 4,27E-21  | 0,493479 | 0,978 | 0,944 | 8,16E-17  | 6 RDH10    |
| TRAM1    | 1,25E-20  | 0,266481 | 1     | 0,998 | 2,39E-16  | 6 TRAM1    |
| CCND11   | 4,04E-20  | 0,362655 | 0,993 | 0,964 | 7,73E-16  | 6 CCND1    |
| SLC38A2  | 5,54E-20  | 0,251494 | 1     | 0,971 | 1,06E-15  | 6 SLC38A2  |
| RHOBTB31 | 8,06E-20  | 0,419355 | 1     | 0,996 | 1,54E-15  | 6 RHOBTB3  |
| CCND2    | 9,47E-20  | 0,343465 | 0,784 | 0,612 | 1,81E-15  | 6 CCND2    |
| EPAS1    | 1,70E-19  | 0,273068 | 1     | 0,994 | 3,25E-15  | 6 EPAS1    |
| COL5A2   | 2,18E-19  | 0,250161 | 0,996 | 0,974 | 4,17E-15  | 6 COL5A2   |
| GAS61    | 5,58E-19  | 0,344453 | 0,996 | 0,988 | 1,07E-14  | 6 GAS6     |
| CTTN     | 1,08E-18  | 0,382821 | 0,996 | 0,974 | 2,07E-14  | 6 CTTN     |
| TP53I11  | 2,80E-18  | 0,283097 | 0,959 | 0,902 | 5,35E-14  | 6 TP53I11  |
| MT-ND2   | 4,55E-18  | 0,262085 | 1     | 1     | 8,70E-14  | 6 MT-ND2   |
| DAB21    | 2,36E-17  | 0,2992   | 0,996 | 0,99  | 4,50E-13  | 6 DAB2     |
| LBH      | 5,33E-17  | 0,329519 | 0,993 | 0,945 | 1,02E-12  | 6 LBH      |
| SLC20A21 | 7,17E-17  | 0,263463 | 0,81  | 0,636 | 1,37E-12  | 6 SLC20A2  |
| SDC41    | 9,95E-17  | 0,298797 | 0,989 | 0,882 | 1,90E-12  | 6 SDC4     |
| CTGF     | 1,31E-16  | 0,322377 | 0,981 | 0,899 | 2,50E-12  | 6 CTGF     |
| CCL21    | 3,40E-15  | 0,471245 | 0,896 | 0,769 | 6,49E-11  | 6 CCL2     |
| AXL1     | 5,25E-10  | 0,284078 | 0,989 | 0,923 | 1,00E-05  | 6 AXL      |
| B4GALT1  | 2,20E-08  | 0,258665 | 0,74  | 0,604 | 0,000421  | 6 B4GALT1  |
| CYP1B11  | 1,60E-07  | 0,258252 | 0,584 | 0,43  | 0,00306   | 6 CYP1B1   |
| CTNNB11  | 3,32E-07  | 0,330981 | 0,885 | 0,762 | 0,006349  | 6 CTNNB1   |
| LRRC75A1 | 1,14E-06  | 0,489372 | 0,732 | 0,604 | 0,021738  | 6 LRRC75A  |
| CLDN111  | 3,58E-06  | 0,400372 | 1     | 0,999 | 0,068515  | 6 CLDN11   |
| HSP90AA1 | 1,46E-138 | 1,51227  | 1     | 0,999 | 2,80E-134 | 7 HSP90AA1 |
| UBC1     | 1,37E-135 | 1,322205 | 1     | 1     | 2,61E-131 | 7 UBC      |
| CD632    | 2,10E-132 | 1,215976 | 1     | 1     | 4,02E-128 | 7 CD63     |
| LAPTM4A  | 2,52E-131 | 1,173381 | 1     | 0,997 | 4,82E-127 | 7 LAPTM4A  |
| ANXA5    | 4,15E-129 | 1,03301  | 1     | 1     | 7,94E-125 | 7 ANXA5    |
| ITM2B2   | 2,59E-121 | 1,163117 | 1     | 0,992 | 4,95E-117 | 7 ITM2B    |
| HLA-C2   | 1,06E-114 | 1,050031 | 1     | 0,999 | 2,02E-110 | 7 HLA-C    |
| PSMA71   | 6,12E-113 | 0,87559  | 1     | 0,999 | 1,17E-108 | 7 PSMA7    |
| PDIA31   | 1,57E-112 | 0,948063 | 1     | 0,972 | 3,00E-108 | 7 PDIA3    |
| HLA-A2   | 4,01E-112 | 1,211232 | 1     | 0,999 | 7,66E-108 | 7 HLA-A    |
| RPN2     | 1,42E-110 | 0,940499 | 0,996 | 0,953 | 2,71E-106 | 7 RPN2     |
| TALDO11  | 4,26E-109 | 1,03683  | 1     | 0,997 | 8,14E-105 | 7 TALDO1   |
| HSP90AB1 | 1,80E-107 | 1,062237 | 1     | 0,999 | 3,44E-103 | 7 HSP90AB1 |
| sep-71   | 3,11E-107 | 0,967632 | 1     | 0,995 | 5,95E-103 | 7 07-sep   |
| SSB      | 3,69E-107 | 0,952947 | 1     | 0,963 | 7,05E-103 | 7 SSB      |
| TMBIM61  | 1,44E-106 | 0,941626 | 1     | 0,992 | 2,75E-102 | 7 TMBIM6   |
| HSP90B1  | 4,37E-106 | 1,122417 | 1     | 0,964 | 8,36E-102 | 7 HSP90B1  |
| UBXN4    | 9,01E-105 | 0,816313 | 0,996 | 0,96  | 1,72E-100 | 7 UBXN4    |
| RTN4     | 4,91E-104 | 0,814572 | 1     | 1     | 9,40E-100 | 7 RTN4     |
| ANXA21   | 9,96E-104 | 1,110721 | 1     | 1     | 1,90E-99  | 7 ANXA2    |
| PGK1     | 1,14E-103 | 0,910451 | 0,996 | 0,973 | 2,18E-99  | 7 PGK1     |
| TMEM59   | 1,46E-103 | 0,891677 | 1     | 0,992 | 2,79E-99  | 7 TMEM59   |



|           |           |          |       |       |          |             |
|-----------|-----------|----------|-------|-------|----------|-------------|
| HSPA51    | 5,16E-103 | 1,130213 | 0,996 | 0,974 | 9,86E-99 | 7 HSPA5     |
| ATP6AP2   | 7,43E-103 | 0,854809 | 0,996 | 0,94  | 1,42E-98 | 7 ATP6AP2   |
| MVP       | 1,29E-100 | 0,862836 | 0,996 | 0,945 | 2,46E-96 | 7 MVP       |
| ATP5B     | 3,24E-100 | 0,756597 | 0,996 | 0,994 | 6,19E-96 | 7 ATP5B     |
| MAGED2    | 3,77E-100 | 0,890743 | 0,996 | 0,911 | 7,20E-96 | 7 MAGED2    |
| CTSL      | 4,38E-100 | 0,940618 | 0,992 | 0,94  | 8,37E-96 | 7 CTSL      |
| IGFBP7    | 1,64E-99  | 1,031663 | 1     | 1     | 3,14E-95 | 7 IGFBP7    |
| PRDX11    | 2,46E-99  | 1,028698 | 1     | 1     | 4,70E-95 | 7 PRDX1     |
| UBB       | 1,31E-98  | 0,831221 | 1     | 0,999 | 2,50E-94 | 7 UBB       |
| PSMA4     | 1,43E-98  | 0,854705 | 1     | 0,988 | 2,74E-94 | 7 PSMA4     |
| ATP1B3    | 2,06E-97  | 0,788761 | 0,996 | 0,952 | 3,93E-93 | 7 ATP1B3    |
| REEP5     | 1,70E-96  | 0,755135 | 0,996 | 0,965 | 3,25E-92 | 7 REEP5     |
| LGALS3BP1 | 9,80E-96  | 0,917556 | 0,989 | 0,962 | 1,87E-91 | 7 LGALS3BP1 |
| MYL12B    | 1,14E-94  | 0,799367 | 1     | 0,999 | 2,19E-90 | 7 MYL12B    |
| TPM2      | 2,90E-93  | 0,841434 | 1     | 1     | 5,55E-89 | 7 TPM2      |
| DNAJA1    | 6,67E-93  | 0,743583 | 0,996 | 0,954 | 1,27E-88 | 7 DNAJA1    |
| EMC7      | 2,94E-91  | 0,658198 | 0,989 | 0,891 | 5,63E-87 | 7 EMC7      |
| PSMA3     | 7,55E-91  | 0,778198 | 0,977 | 0,961 | 1,44E-86 | 7 PSMA3     |
| ADH51     | 1,35E-89  | 0,77084  | 0,992 | 0,991 | 2,58E-85 | 7 ADH5      |
| SPCS2     | 2,44E-89  | 0,700712 | 0,992 | 0,951 | 4,66E-85 | 7 SPCS2     |
| ANXA12    | 1,06E-88  | 0,974148 | 1     | 0,992 | 2,02E-84 | 7 ANXA1     |
| COPB2     | 1,34E-88  | 0,728224 | 0,977 | 0,848 | 2,56E-84 | 7 COPB2     |
| PRDX41    | 2,99E-88  | 0,765774 | 0,996 | 0,946 | 5,72E-84 | 7 PRDX4     |
| TUBA1A    | 1,49E-87  | 1,308098 | 1     | 0,997 | 2,85E-83 | 7 TUBA1A    |
| LMNA1     | 5,65E-87  | 0,800296 | 1     | 0,998 | 1,08E-82 | 7 LMNA      |
| SEC62     | 8,95E-87  | 0,720436 | 1     | 0,983 | 1,71E-82 | 7 SEC62     |
| UQCRC11   | 9,69E-87  | 0,692748 | 0,996 | 0,948 | 1,85E-82 | 7 UQCRC1    |
| HLA-B2    | 1,99E-86  | 1,024019 | 1     | 0,999 | 3,80E-82 | 7 HLA-B     |
| CLU       | 3,09E-86  | 1,040373 | 0,996 | 0,957 | 5,92E-82 | 7 CLU       |
| CCT5      | 1,63E-85  | 0,730842 | 0,977 | 0,87  | 3,13E-81 | 7 CCT5      |
| APLP2     | 2,42E-85  | 0,797275 | 1     | 0,978 | 4,64E-81 | 7 APLP2     |
| GSTP11    | 6,42E-85  | 0,656778 | 1     | 0,999 | 1,23E-80 | 7 GSTP1     |
| CD91      | 2,29E-84  | 0,845199 | 1     | 0,95  | 4,38E-80 | 7 CD9       |
| PPIB1     | 1,17E-83  | 0,696577 | 1     | 1     | 2,24E-79 | 7 PPIB      |
| RNH1      | 1,19E-83  | 0,653168 | 1     | 0,982 | 2,28E-79 | 7 RNH1      |
| C1R2      | 8,32E-83  | 1,169237 | 1     | 0,974 | 1,59E-78 | 7 C1R       |
| ANXA6     | 8,44E-83  | 0,796361 | 1     | 0,978 | 1,61E-78 | 7 ANXA6     |
| NUCB2     | 3,56E-82  | 0,741624 | 0,989 | 0,909 | 6,80E-78 | 7 NUCB2     |
| MYL12A    | 7,10E-82  | 0,858901 | 1     | 1     | 1,36E-77 | 7 MYL12A    |
| CALD1     | 8,08E-82  | 1,045412 | 1     | 1     | 1,54E-77 | 7 CALD1     |
| HACD3     | 8,20E-82  | 0,595244 | 0,936 | 0,65  | 1,57E-77 | 7 HACD3     |
| UCHL11    | 1,89E-81  | 1,005907 | 1     | 0,999 | 3,62E-77 | 7 UCHL1     |
| PCOLCE2   | 4,15E-81  | 1,187702 | 1     | 0,983 | 7,93E-77 | 7 PCOLCE    |
| ACTB      | 5,48E-81  | 0,696871 | 1     | 1     | 1,05E-76 | 7 ACTB      |
| XRCC6     | 1,40E-80  | 0,685825 | 0,996 | 0,928 | 2,68E-76 | 7 XRCC6     |
| ERP44     | 4,79E-80  | 0,644706 | 0,955 | 0,745 | 9,16E-76 | 7 ERP44     |
| MGST11    | 2,14E-77  | 0,763731 | 1     | 1     | 4,10E-73 | 7 MGST1     |
| EPHX1     | 5,18E-77  | 0,712751 | 0,962 | 0,781 | 9,91E-73 | 7 EPHX1     |
| MDH1      | 1,32E-76  | 0,629535 | 0,973 | 0,917 | 2,52E-72 | 7 MDH1      |
| COPS61    | 2,82E-76  | 0,659909 | 0,992 | 0,973 | 5,39E-72 | 7 COPS6     |

|         |          |          |       |       |          |           |
|---------|----------|----------|-------|-------|----------|-----------|
| LAMP11  | 3,35E-76 | 0,664712 | 1     | 0,988 | 6,40E-72 | 7 LAMP1   |
| ENO11   | 4,47E-76 | 0,818165 | 1     | 0,998 | 8,54E-72 | 7 ENO1    |
| PSMC2   | 7,61E-76 | 0,596131 | 0,947 | 0,788 | 1,46E-71 | 7 PSMC2   |
| PSMD7   | 3,49E-75 | 0,612701 | 0,973 | 0,926 | 6,68E-71 | 7 PSMD7   |
| XRCC5   | 4,90E-75 | 0,661643 | 0,989 | 0,933 | 9,37E-71 | 7 XRCC5   |
| ALDOA1  | 9,17E-75 | 0,562902 | 1     | 1     | 1,75E-70 | 7 ALDOA   |
| PSMB11  | 1,86E-74 | 0,62716  | 1     | 0,995 | 3,56E-70 | 7 PSMB1   |
| MDH21   | 1,50E-73 | 0,5576   | 0,996 | 0,985 | 2,87E-69 | 7 MDH2    |
| ACTR10  | 4,02E-73 | 0,577109 | 0,966 | 0,777 | 7,69E-69 | 7 ACTR10  |
| LAMP22  | 8,22E-73 | 0,647615 | 0,989 | 0,934 | 1,57E-68 | 7 LAMP2   |
| CCT2    | 2,09E-72 | 0,593625 | 0,981 | 0,897 | 4,00E-68 | 7 CCT2    |
| PKM1    | 4,76E-72 | 0,86271  | 1     | 0,999 | 9,10E-68 | 7 PKM     |
| FUCA2   | 5,05E-72 | 0,548176 | 0,977 | 0,841 | 9,65E-68 | 7 FUCA2   |
| HEXB    | 1,62E-71 | 0,687114 | 0,973 | 0,831 | 3,10E-67 | 7 HEXB    |
| C1S2    | 3,93E-71 | 0,87712  | 1     | 0,985 | 7,51E-67 | 7 C1S     |
| PSMD1   | 7,97E-71 | 0,614509 | 0,97  | 0,834 | 1,52E-66 | 7 PSMD1   |
| ACTG21  | 1,94E-70 | 1,454601 | 1     | 1     | 3,70E-66 | 7 ACTG2   |
| EPRS    | 4,10E-70 | 0,711239 | 0,977 | 0,849 | 7,84E-66 | 7 EPRS    |
| TIMP11  | 5,30E-70 | 0,900418 | 1     | 1     | 1,01E-65 | 7 TIMP1   |
| PSMC3   | 2,43E-69 | 0,574506 | 0,992 | 0,919 | 4,64E-65 | 7 PSMC3   |
| TPM1    | 3,60E-69 | 0,879253 | 1     | 1     | 6,89E-65 | 7 TPM1    |
| NDUFS2  | 2,08E-68 | 0,550049 | 0,966 | 0,845 | 3,98E-64 | 7 NDUFS2  |
| ARPC31  | 7,28E-68 | 0,526101 | 0,989 | 0,997 | 1,39E-63 | 7 ARPC3   |
| PDIA61  | 1,85E-67 | 0,716349 | 0,989 | 0,974 | 3,54E-63 | 7 PDIA6   |
| REXO21  | 6,02E-67 | 0,62188  | 0,992 | 0,995 | 1,15E-62 | 7 REXO2   |
| PSMD6   | 9,89E-67 | 0,53674  | 0,943 | 0,768 | 1,89E-62 | 7 PSMD6   |
| NQO11   | 2,39E-66 | 0,90378  | 0,996 | 0,99  | 4,57E-62 | 7 NQO1    |
| RARS    | 3,30E-66 | 0,645016 | 0,985 | 0,866 | 6,32E-62 | 7 RARS    |
| CYBA    | 3,67E-66 | 0,848661 | 0,992 | 0,98  | 7,03E-62 | 7 CYBA    |
| SKP11   | 4,15E-66 | 0,546871 | 1     | 0,999 | 7,94E-62 | 7 SKP1    |
| CTSC1   | 6,55E-66 | 0,848668 | 1     | 0,999 | 1,25E-61 | 7 CTSC    |
| CD47    | 7,37E-66 | 0,634308 | 0,992 | 0,926 | 1,41E-61 | 7 CD47    |
| ARL6IP5 | 1,40E-65 | 0,505285 | 0,992 | 0,98  | 2,67E-61 | 7 ARL6IP5 |
| GSN1    | 1,58E-65 | 0,642616 | 0,996 | 0,936 | 3,02E-61 | 7 GSN     |
| GSTO1   | 2,52E-65 | 0,660046 | 0,996 | 0,994 | 4,82E-61 | 7 GSTO1   |
| ARF4    | 3,61E-65 | 0,578387 | 0,996 | 0,993 | 6,90E-61 | 7 ARF4    |
| RABAC1  | 1,27E-64 | 0,497618 | 1     | 1     | 2,43E-60 | 7 RABAC1  |
| DHRS7   | 3,77E-64 | 0,5412   | 0,955 | 0,789 | 7,21E-60 | 7 DHRS7   |
| VCP     | 9,59E-64 | 0,613249 | 0,992 | 0,934 | 1,83E-59 | 7 VCP     |
| LGALS31 | 1,11E-63 | 0,722751 | 1     | 0,999 | 2,13E-59 | 7 LGALS3  |
| COPE1   | 1,84E-63 | 0,501377 | 0,996 | 0,995 | 3,52E-59 | 7 COPE    |
| NUDC    | 2,24E-63 | 0,526737 | 0,985 | 0,919 | 4,28E-59 | 7 NUDC    |
| PPP1R7  | 8,54E-63 | 0,561487 | 0,973 | 0,887 | 1,63E-58 | 7 PPP1R7  |
| NDUFA9  | 4,11E-62 | 0,484153 | 0,947 | 0,774 | 7,86E-58 | 7 NDUFA9  |
| HEXA1   | 4,31E-62 | 0,60722  | 0,973 | 0,901 | 8,24E-58 | 7 HEXA    |
| CTSA1   | 9,43E-62 | 0,711389 | 1     | 0,988 | 1,80E-57 | 7 CTSA    |
| CDC123  | 1,17E-61 | 0,475546 | 0,955 | 0,77  | 2,24E-57 | 7 CDC123  |
| PSMD81  | 1,26E-61 | 0,55708  | 0,996 | 0,994 | 2,41E-57 | 7 PSMD8   |
| PSMC4   | 1,59E-61 | 0,503488 | 0,943 | 0,757 | 3,04E-57 | 7 PSMC4   |
| SLC3A2  | 2,50E-61 | 0,683432 | 0,985 | 0,912 | 4,77E-57 | 7 SLC3A2  |

|           |          |          |       |       |          |             |
|-----------|----------|----------|-------|-------|----------|-------------|
| DEGS1     | 2,71E-61 | 0,575613 | 0,977 | 0,847 | 5,19E-57 | 7 DEGS1     |
| EIF4A3    | 2,73E-61 | 0,472815 | 0,917 | 0,654 | 5,21E-57 | 7 EIF4A3    |
| LDHB      | 3,11E-61 | 0,443943 | 1     | 1     | 5,94E-57 | 7 LDHB      |
| G6PD1     | 6,13E-61 | 0,637961 | 1     | 0,985 | 1,17E-56 | 7 G6PD      |
| LUM2      | 6,16E-61 | 0,944071 | 0,996 | 0,985 | 1,18E-56 | 7 LUM       |
| BLVRA     | 4,19E-60 | 0,425796 | 0,932 | 0,665 | 8,02E-56 | 7 BLVRA     |
| PDHB      | 4,46E-60 | 0,499472 | 0,939 | 0,793 | 8,52E-56 | 7 PDHB      |
| GSTM3     | 4,80E-60 | 0,661467 | 0,97  | 0,965 | 9,19E-56 | 7 GSTM3     |
| CCT7      | 5,76E-60 | 0,514841 | 0,981 | 0,915 | 1,10E-55 | 7 CCT7      |
| AP2M11    | 1,16E-59 | 0,51993  | 1     | 0,998 | 2,22E-55 | 7 AP2M1     |
| EMC3      | 3,76E-59 | 0,4742   | 0,962 | 0,857 | 7,18E-55 | 7 EMC3      |
| PHGDH1    | 4,17E-59 | 0,76786  | 0,985 | 0,899 | 7,98E-55 | 7 PHGDH     |
| CAPZB     | 7,06E-59 | 0,488411 | 1     | 0,993 | 1,35E-54 | 7 CAPZB     |
| FDPS1     | 1,99E-58 | 0,828963 | 0,996 | 0,975 | 3,81E-54 | 7 FDPS      |
| PSME2     | 2,46E-58 | 0,640579 | 0,962 | 0,952 | 4,71E-54 | 7 PSME2     |
| GARS      | 3,00E-58 | 0,707658 | 0,989 | 0,969 | 5,74E-54 | 7 GARS      |
| DDX1      | 4,13E-58 | 0,509404 | 0,947 | 0,825 | 7,90E-54 | 7 DDX1      |
| SON       | 4,89E-58 | 0,681554 | 0,996 | 0,967 | 9,34E-54 | 7 SON       |
| SIL1      | 5,13E-58 | 0,510437 | 0,936 | 0,758 | 9,81E-54 | 7 SIL1      |
| RAC1      | 9,84E-58 | 0,456883 | 1     | 0,999 | 1,88E-53 | 7 RAC1      |
| AIMP1     | 1,10E-57 | 0,506928 | 0,97  | 0,84  | 2,10E-53 | 7 AIMP1     |
| PSMB3     | 4,34E-57 | 0,568315 | 0,981 | 0,977 | 8,31E-53 | 7 PSMB3     |
| KIF5B     | 4,36E-57 | 0,682219 | 0,992 | 0,971 | 8,35E-53 | 7 KIF5B     |
| TUBB4B    | 4,75E-57 | 0,847953 | 0,977 | 0,914 | 9,08E-53 | 7 TUBB4B    |
| DDOST1    | 9,48E-57 | 0,535595 | 0,985 | 0,947 | 1,81E-52 | 7 DDOST     |
| ILK       | 2,24E-56 | 0,602813 | 0,996 | 0,971 | 4,28E-52 | 7 ILK       |
| SF3B2     | 2,86E-56 | 0,502163 | 0,996 | 0,938 | 5,48E-52 | 7 SF3B2     |
| LMAN1     | 3,07E-56 | 0,523006 | 0,992 | 0,929 | 5,87E-52 | 7 LMAN1     |
| ACAT1     | 3,42E-56 | 0,486188 | 0,973 | 0,851 | 6,54E-52 | 7 ACAT1     |
| C1GALT1C1 | 5,57E-56 | 0,43348  | 0,822 | 0,447 | 1,06E-51 | 7 C1GALT1C1 |
| MAGED1    | 1,85E-55 | 0,613351 | 0,97  | 0,935 | 3,53E-51 | 7 MAGED1    |
| PSMC1     | 2,08E-55 | 0,49358  | 0,966 | 0,889 | 3,98E-51 | 7 PSMC1     |
| HADHB     | 2,82E-55 | 0,473311 | 0,966 | 0,894 | 5,39E-51 | 7 HADHB     |
| CALM21    | 3,03E-55 | 0,694751 | 1     | 1     | 5,80E-51 | 7 CALM2     |
| CALR1     | 3,94E-55 | 0,618958 | 1     | 0,998 | 7,54E-51 | 7 CALR      |
| HDAC2     | 2,27E-54 | 0,488826 | 0,955 | 0,834 | 4,35E-50 | 7 HDAC2     |
| PRDX21    | 1,01E-53 | 0,494864 | 0,989 | 0,985 | 1,93E-49 | 7 PRDX2     |
| P4HA2     | 1,16E-53 | 0,456095 | 0,939 | 0,741 | 2,21E-49 | 7 P4HA2     |
| GHITM     | 1,43E-53 | 0,452061 | 0,996 | 0,979 | 2,74E-49 | 7 GHITM     |
| TAX1BP1   | 1,79E-53 | 0,531457 | 0,992 | 0,977 | 3,43E-49 | 7 TAX1BP1   |
| PRMT1     | 2,09E-53 | 0,49867  | 0,966 | 0,882 | 4,00E-49 | 7 PRMT1     |
| OCIAD1    | 2,47E-53 | 0,459193 | 0,977 | 0,934 | 4,73E-49 | 7 OCIAD1    |
| ATP6VOD1  | 3,68E-53 | 0,462087 | 0,977 | 0,919 | 7,04E-49 | 7 ATP6VOD1  |
| PSAP2     | 4,09E-53 | 0,638615 | 1     | 0,996 | 7,82E-49 | 7 PSAP      |
| NNMT1     | 4,35E-53 | 0,741062 | 1     | 0,995 | 8,32E-49 | 7 NNMT      |
| LRPAP1    | 5,32E-53 | 0,509203 | 0,985 | 0,927 | 1,02E-48 | 7 LRPAP1    |
| RRAGA     | 7,51E-53 | 0,445713 | 0,947 | 0,861 | 1,44E-48 | 7 RRAGA     |
| SCPEP11   | 8,01E-53 | 0,50243  | 0,973 | 0,853 | 1,53E-48 | 7 SCPEP1    |
| SOD1      | 8,19E-53 | 0,443803 | 0,989 | 0,999 | 1,57E-48 | 7 SOD1      |
| ATP5C11   | 1,60E-52 | 0,467233 | 0,989 | 0,983 | 3,05E-48 | 7 ATP5C1    |

|           |          |          |       |       |          |            |
|-----------|----------|----------|-------|-------|----------|------------|
| ATP5A1    | 1,62E-52 | 0,447722 | 1     | 0,996 | 3,10E-48 | 7 ATP5A1   |
| PTGR11    | 3,52E-52 | 0,869818 | 0,992 | 0,972 | 6,73E-48 | 7 PTGR1    |
| DDX24     | 3,82E-52 | 0,523911 | 0,996 | 0,943 | 7,31E-48 | 7 DDX24    |
| FAM50A    | 4,01E-52 | 0,456319 | 0,989 | 0,944 | 7,67E-48 | 7 FAM50A   |
| BCAP31    | 4,10E-52 | 0,493224 | 0,985 | 0,929 | 7,85E-48 | 7 BCAP31   |
| XRN2      | 4,87E-52 | 0,515909 | 0,989 | 0,931 | 9,31E-48 | 7 XRN2     |
| CNN3      | 7,24E-52 | 0,485139 | 0,996 | 0,994 | 1,38E-47 | 7 CNN3     |
| MYL61     | 8,76E-52 | 0,538474 | 1     | 1     | 1,68E-47 | 7 MYL6     |
| VPS35     | 1,34E-51 | 0,456163 | 0,955 | 0,869 | 2,57E-47 | 7 VPS35    |
| ATXN10    | 1,64E-51 | 0,490053 | 0,97  | 0,908 | 3,15E-47 | 7 ATXN10   |
| SDHA      | 1,96E-51 | 0,455067 | 0,955 | 0,752 | 3,75E-47 | 7 SDHA     |
| PERP1     | 2,64E-51 | 0,482636 | 1     | 0,997 | 5,04E-47 | 7 PERP     |
| SNRPB2    | 3,50E-51 | 0,483439 | 0,966 | 0,959 | 6,70E-47 | 7 SNRPB2   |
| NANS1     | 3,75E-51 | 0,580566 | 0,97  | 0,839 | 7,17E-47 | 7 NANS     |
| EMP3      | 4,09E-51 | 0,512723 | 0,996 | 0,999 | 7,83E-47 | 7 EMP3     |
| FERMT2    | 4,68E-51 | 0,639262 | 0,985 | 0,918 | 8,95E-47 | 7 FERMT2   |
| ARL1      | 5,08E-51 | 0,427751 | 0,958 | 0,861 | 9,71E-47 | 7 ARL1     |
| DYNC1I2   | 9,79E-51 | 0,539461 | 0,989 | 0,93  | 1,87E-46 | 7 DYNC1I2  |
| SERPINF12 | 1,19E-50 | 0,645441 | 0,977 | 0,817 | 2,28E-46 | 7 SERPINF1 |
| TUFM      | 1,26E-50 | 0,461277 | 0,996 | 0,977 | 2,41E-46 | 7 TUFM     |
| TMEM50A   | 1,39E-50 | 0,465987 | 0,97  | 0,974 | 2,66E-46 | 7 TMEM50A  |
| DPM1      | 1,63E-50 | 0,450467 | 0,924 | 0,809 | 3,11E-46 | 7 DPM1     |
| CCT4      | 2,10E-50 | 0,500682 | 0,985 | 0,943 | 4,02E-46 | 7 CCT4     |
| SERPINH11 | 3,81E-50 | 0,620206 | 0,996 | 0,985 | 7,29E-46 | 7 SERPINH1 |
| PUF60     | 4,36E-50 | 0,43084  | 0,958 | 0,797 | 8,34E-46 | 7 PUF60    |
| ECH1      | 4,49E-50 | 0,478824 | 0,966 | 0,839 | 8,58E-46 | 7 ECH1     |
| HAT1      | 4,72E-50 | 0,315146 | 0,807 | 0,438 | 9,02E-46 | 7 HAT1     |
| ETFB1     | 5,20E-50 | 0,526329 | 0,981 | 0,951 | 9,94E-46 | 7 ETFB     |
| ASNS      | 1,65E-49 | 0,64733  | 0,837 | 0,6   | 3,15E-45 | 7 ASNS     |
| EMC2      | 2,33E-49 | 0,404633 | 0,864 | 0,607 | 4,46E-45 | 7 EMC2     |
| HSPA9     | 2,93E-49 | 0,478435 | 0,958 | 0,879 | 5,60E-45 | 7 HSPA9    |
| HNRNPH2   | 4,18E-49 | 0,413074 | 0,924 | 0,759 | 7,99E-45 | 7 HNRNPH2  |
| IK        | 4,45E-49 | 0,474068 | 0,936 | 0,814 | 8,50E-45 | 7 IK       |
| NCL       | 5,89E-49 | 0,562388 | 1     | 0,988 | 1,13E-44 | 7 NCL      |
| CHMP2A1   | 9,30E-49 | 0,436804 | 0,981 | 0,987 | 1,78E-44 | 7 CHMP2A   |
| UNC50     | 2,09E-48 | 0,357034 | 0,909 | 0,64  | 3,99E-44 | 7 UNC50    |
| UQCRC2    | 2,13E-48 | 0,42987  | 0,989 | 0,954 | 4,07E-44 | 7 UQCRC2   |
| OAT       | 2,33E-48 | 0,468359 | 0,992 | 0,911 | 4,45E-44 | 7 OAT      |
| TPR       | 3,21E-48 | 0,504053 | 0,966 | 0,858 | 6,13E-44 | 7 TPR      |
| CLTA      | 5,33E-48 | 0,391827 | 1     | 1     | 1,02E-43 | 7 CLTA     |
| ACTR3     | 6,18E-48 | 0,540481 | 0,996 | 0,98  | 1,18E-43 | 7 ACTR3    |
| CPNE3     | 7,59E-48 | 0,395644 | 0,958 | 0,768 | 1,45E-43 | 7 CPNE3    |
| RAB2A     | 9,01E-48 | 0,414048 | 0,992 | 0,985 | 1,72E-43 | 7 RAB2A    |
| NDUFC2    | 1,07E-47 | 0,491442 | 0,989 | 0,985 | 2,04E-43 | 7 NDUFC2   |
| PCMT1     | 1,15E-47 | 0,422488 | 0,955 | 0,83  | 2,20E-43 | 7 PCMT1    |
| VPS29     | 1,24E-47 | 0,431892 | 0,97  | 0,959 | 2,36E-43 | 7 VPS29    |
| ALDH21    | 2,31E-47 | 0,556522 | 0,97  | 0,871 | 4,42E-43 | 7 ALDH2    |
| SGCE      | 2,51E-47 | 0,398169 | 0,818 | 0,494 | 4,80E-43 | 7 SGCE     |
| ATP6V1E1  | 3,72E-47 | 0,43647  | 0,989 | 0,976 | 7,12E-43 | 7 ATP6V1E1 |
| GRN2      | 4,56E-47 | 0,596909 | 1     | 0,99  | 8,72E-43 | 7 GRN      |

|          |          |          |       |       |          |            |
|----------|----------|----------|-------|-------|----------|------------|
| PSMD2    | 5,20E-47 | 0,426958 | 0,977 | 0,886 | 9,95E-43 | 7 PSMD2    |
| PSMD4    | 7,18E-47 | 0,394418 | 0,996 | 0,952 | 1,37E-42 | 7 PSMD4    |
| SYPL1    | 9,58E-47 | 0,454556 | 0,977 | 0,901 | 1,83E-42 | 7 SYPL1    |
| UFL1     | 1,00E-46 | 0,373827 | 0,848 | 0,569 | 1,92E-42 | 7 UFL1     |
| TFPI     | 1,59E-46 | 0,535681 | 0,996 | 0,975 | 3,05E-42 | 7 TFPI     |
| DECR1    | 2,05E-46 | 0,397324 | 0,955 | 0,921 | 3,93E-42 | 7 DECR1    |
| FH       | 2,13E-46 | 0,387265 | 0,875 | 0,622 | 4,07E-42 | 7 FH       |
| MGST31   | 2,95E-46 | 0,478127 | 0,996 | 0,996 | 5,64E-42 | 7 MGST3    |
| GLB1     | 4,27E-46 | 0,433158 | 0,871 | 0,633 | 8,17E-42 | 7 GLB1     |
| ALDH1A11 | 8,05E-46 | 1,398335 | 1     | 0,99  | 1,54E-41 | 7 ALDH1A1  |
| RCN2     | 1,12E-45 | 0,430404 | 0,989 | 0,947 | 2,14E-41 | 7 RCN2     |
| TRAPPC4  | 1,58E-45 | 0,396779 | 0,928 | 0,808 | 3,03E-41 | 7 TRAPPC4  |
| SERPINE2 | 1,82E-45 | 0,74316  | 0,989 | 0,91  | 3,47E-41 | 7 SERPINE2 |
| ANXA7    | 6,02E-45 | 0,386921 | 0,958 | 0,873 | 1,15E-40 | 7 ANXA7    |
| ECM11    | 1,04E-44 | 0,481593 | 0,917 | 0,769 | 2,00E-40 | 7 ECM1     |
| MORF4L1  | 2,05E-44 | 0,421662 | 1     | 0,997 | 3,92E-40 | 7 MORF4L1  |
| CCPG11   | 2,07E-44 | 0,396435 | 0,924 | 0,675 | 3,96E-40 | 7 CCPG1    |
| TXNL1    | 2,12E-44 | 0,440798 | 0,97  | 0,952 | 4,06E-40 | 7 TXNL1    |
| CD151    | 2,45E-44 | 0,530367 | 1     | 0,995 | 4,68E-40 | 7 CD151    |
| ACAT21   | 2,54E-44 | 0,608713 | 0,973 | 0,858 | 4,86E-40 | 7 ACAT2    |
| SDCBP    | 3,64E-44 | 0,440423 | 0,992 | 0,986 | 6,95E-40 | 7 SDCBP    |
| ZNF622   | 5,29E-44 | 0,375533 | 0,909 | 0,712 | 1,01E-39 | 7 ZNF622   |
| ADRM1    | 5,90E-44 | 0,426199 | 0,992 | 0,962 | 1,13E-39 | 7 ADRM1    |
| SUCLG1   | 6,06E-44 | 0,432713 | 0,943 | 0,894 | 1,16E-39 | 7 SUCLG1   |
| YWHAB    | 6,70E-44 | 0,393149 | 1     | 0,994 | 1,28E-39 | 7 YWHAB    |
| FKBP3    | 8,18E-44 | 0,422529 | 0,939 | 0,876 | 1,56E-39 | 7 FKBP3    |
| VCAM1    | 8,49E-44 | 0,782498 | 0,932 | 0,801 | 1,62E-39 | 7 VCAM1    |
| ACTN1    | 1,06E-43 | 0,61439  | 1     | 0,996 | 2,03E-39 | 7 ACTN1    |
| HSPD1    | 1,51E-43 | 0,474884 | 0,981 | 0,92  | 2,88E-39 | 7 HSPD1    |
| MFAP1    | 1,53E-43 | 0,347082 | 0,83  | 0,55  | 2,92E-39 | 7 MFAP1    |
| HNRNPK   | 2,53E-43 | 0,435193 | 1     | 0,995 | 4,84E-39 | 7 HNRNPK   |
| LEPROT   | 2,65E-43 | 0,441658 | 0,985 | 0,984 | 5,07E-39 | 7 LEPROT   |
| DNAJC8   | 6,34E-43 | 0,424892 | 0,989 | 0,955 | 1,21E-38 | 7 DNAJC8   |
| MYL91    | 8,23E-43 | 0,542949 | 1     | 1     | 1,57E-38 | 7 MYL9     |
| POLR2G   | 1,04E-42 | 0,394662 | 0,939 | 0,869 | 1,98E-38 | 7 POLR2G   |
| ETFA     | 1,18E-42 | 0,381875 | 0,955 | 0,907 | 2,26E-38 | 7 ETFA     |
| SMC3     | 1,24E-42 | 0,440865 | 0,924 | 0,761 | 2,37E-38 | 7 SMC3     |
| SRP54    | 1,38E-42 | 0,376448 | 0,89  | 0,652 | 2,65E-38 | 7 SRP54    |
| ATIC     | 1,39E-42 | 0,367984 | 0,864 | 0,614 | 2,65E-38 | 7 ATIC     |
| RPN1     | 1,44E-42 | 0,490441 | 0,981 | 0,892 | 2,76E-38 | 7 RPN1     |
| GPX8     | 2,93E-42 | 0,399139 | 0,985 | 0,976 | 5,61E-38 | 7 GPX8     |
| MICU2    | 3,96E-42 | 0,291093 | 0,811 | 0,495 | 7,57E-38 | 7 MICU2    |
| ANXA4    | 4,20E-42 | 0,431456 | 0,939 | 0,879 | 8,02E-38 | 7 ANXA4    |
| TUBB2A   | 4,75E-42 | 0,457771 | 0,864 | 0,66  | 9,08E-38 | 7 TUBB2A   |
| PEPD     | 5,44E-42 | 0,446337 | 0,955 | 0,867 | 1,04E-37 | 7 PEPD     |
| COPS4    | 9,64E-42 | 0,374723 | 0,932 | 0,806 | 1,84E-37 | 7 COPS4    |
| PSMA5    | 1,02E-41 | 0,474896 | 0,955 | 0,97  | 1,96E-37 | 7 PSMA5    |
| SRI      | 1,18E-41 | 0,423629 | 0,981 | 0,971 | 2,26E-37 | 7 SRI      |
| AKR1B11  | 1,22E-41 | 0,639303 | 0,981 | 0,978 | 2,33E-37 | 7 AKR1B1   |
| CALU     | 1,34E-41 | 0,561337 | 1     | 0,997 | 2,57E-37 | 7 CALU     |

|          |          |          |       |       |          |             |
|----------|----------|----------|-------|-------|----------|-------------|
| PSMD14   | 1,63E-41 | 0,372976 | 0,924 | 0,837 | 3,12E-37 | 7 PSMD14    |
| SUPT16H  | 2,11E-41 | 0,409674 | 0,924 | 0,715 | 4,04E-37 | 7 SUPT16H   |
| RER1     | 2,64E-41 | 0,390311 | 0,989 | 0,98  | 5,04E-37 | 7 RER1      |
| KPNA2    | 2,76E-41 | 0,382925 | 0,875 | 0,643 | 5,28E-37 | 7 KPNA2     |
| GGNBP2   | 2,94E-41 | 0,409786 | 0,962 | 0,851 | 5,62E-37 | 7 GGNBP2    |
| DNAJB11  | 3,33E-41 | 0,370588 | 0,92  | 0,753 | 6,38E-37 | 7 DNAJB11   |
| SEC13    | 3,98E-41 | 0,401096 | 0,958 | 0,924 | 7,61E-37 | 7 SEC13     |
| PSMB61   | 4,05E-41 | 0,455192 | 0,985 | 0,982 | 7,74E-37 | 7 PSMB6     |
| EIF4A1   | 5,14E-41 | 0,497341 | 0,989 | 0,973 | 9,84E-37 | 7 EIF4A1    |
| WDR61    | 5,43E-41 | 0,337501 | 0,886 | 0,709 | 1,04E-36 | 7 WDR61     |
| CCT3     | 8,83E-41 | 0,40267  | 0,985 | 0,973 | 1,69E-36 | 7 CCT3      |
| NDUFB81  | 9,38E-41 | 0,424677 | 0,985 | 0,987 | 1,79E-36 | 7 NDUFB8    |
| ORMDL2   | 9,96E-41 | 0,344525 | 0,856 | 0,637 | 1,90E-36 | 7 ORMDL2    |
| ITGB1    | 1,05E-40 | 0,697871 | 1     | 1     | 2,01E-36 | 7 ITGB1     |
| LDHA1    | 1,65E-40 | 0,478538 | 0,996 | 0,993 | 3,16E-36 | 7 LDHA      |
| PLRG1    | 2,13E-40 | 0,357446 | 0,845 | 0,611 | 4,08E-36 | 7 PLRG1     |
| EID1     | 2,13E-40 | 0,405173 | 0,992 | 0,999 | 4,08E-36 | 7 EID1      |
| DPP3     | 2,25E-40 | 0,277108 | 0,773 | 0,447 | 4,30E-36 | 7 DPP3      |
| OS9      | 3,69E-40 | 0,434317 | 0,962 | 0,869 | 7,06E-36 | 7 OS9       |
| FBLN13   | 3,92E-40 | 0,87603  | 1     | 0,991 | 7,50E-36 | 7 FBLN1     |
| MTX1     | 4,08E-40 | 0,338308 | 0,902 | 0,695 | 7,79E-36 | 7 MTX1      |
| AIFM2    | 4,48E-40 | 0,360834 | 0,886 | 0,693 | 8,56E-36 | 7 AIFM2     |
| HNRNPA2B | 6,38E-40 | 0,387715 | 1     | 0,992 | 1,22E-35 | 7 HNRNPA2B1 |
| COPB1    | 7,07E-40 | 0,508995 | 0,97  | 0,864 | 1,35E-35 | 7 COPB1     |
| GBE1     | 8,07E-40 | 0,489684 | 0,928 | 0,785 | 1,54E-35 | 7 GBE1      |
| CAPZA2   | 8,22E-40 | 0,402562 | 0,989 | 0,967 | 1,57E-35 | 7 CAPZA2    |
| CNIH4    | 9,74E-40 | 0,363786 | 0,947 | 0,914 | 1,86E-35 | 7 CNIH4     |
| F10      | 1,02E-39 | 0,319468 | 0,742 | 0,423 | 1,95E-35 | 7 F10       |
| HERPUD1  | 1,12E-39 | 0,422767 | 0,985 | 0,953 | 2,15E-35 | 7 HERPUD1   |
| CTNNA1   | 1,41E-39 | 0,479116 | 0,981 | 0,919 | 2,69E-35 | 7 CTNNA1    |
| BLVRB    | 1,60E-39 | 0,435536 | 0,985 | 0,97  | 3,06E-35 | 7 BLVRB     |
| PLD31    | 1,77E-39 | 0,482751 | 0,992 | 0,978 | 3,38E-35 | 7 PLD3      |
| AGA      | 1,89E-39 | 0,369294 | 0,856 | 0,606 | 3,62E-35 | 7 AGA       |
| TRPV2    | 2,34E-39 | 0,439077 | 0,83  | 0,644 | 4,48E-35 | 7 TRPV2     |
| BSG      | 3,36E-39 | 0,403157 | 1     | 0,998 | 6,42E-35 | 7 BSG       |
| CORO1B   | 4,07E-39 | 0,387065 | 0,989 | 0,945 | 7,78E-35 | 7 CORO1B    |
| SYNCRIP  | 4,39E-39 | 0,408228 | 0,955 | 0,897 | 8,40E-35 | 7 SYNCRIP   |
| SQSTM11  | 4,93E-39 | 0,542348 | 1     | 1     | 9,42E-35 | 7 SQSTM1    |
| ACTA21   | 6,92E-39 | 1,61246  | 0,996 | 0,999 | 1,32E-34 | 7 ACTA2     |
| AKR1C1   | 7,87E-39 | 0,535959 | 0,883 | 0,709 | 1,50E-34 | 7 AKR1C1    |
| RBM42    | 9,46E-39 | 0,341921 | 0,92  | 0,768 | 1,81E-34 | 7 RBM42     |
| NDFIP1   | 1,09E-38 | 0,377204 | 0,958 | 0,933 | 2,08E-34 | 7 NDFIP1    |
| ATP5F1   | 1,32E-38 | 0,368838 | 0,996 | 0,987 | 2,53E-34 | 7 ATP5F1    |
| SMPDL3A2 | 1,40E-38 | 0,534863 | 0,981 | 0,921 | 2,68E-34 | 7 SMPDL3A   |
| VIMP     | 1,59E-38 | 0,426888 | 0,973 | 0,942 | 3,04E-34 | 7 VIMP      |
| HSPA8    | 2,09E-38 | 0,467503 | 1     | 1     | 3,99E-34 | 7 HSPA8     |
| TMED91   | 3,53E-38 | 0,463058 | 0,992 | 0,988 | 6,75E-34 | 7 TMED9     |
| HNRNPU   | 3,92E-38 | 0,425374 | 0,981 | 0,959 | 7,49E-34 | 7 HNRNPU    |
| PFKP     | 4,11E-38 | 0,457001 | 0,909 | 0,781 | 7,86E-34 | 7 PFKP      |
| CALM1    | 4,54E-38 | 0,408403 | 0,985 | 0,992 | 8,67E-34 | 7 CALM1     |



|          |          |          |       |       |          |            |
|----------|----------|----------|-------|-------|----------|------------|
| IFNGR1   | 5,35E-38 | 0,334804 | 0,818 | 0,544 | 1,02E-33 | 7 IFNGR1   |
| TM9SF2   | 6,42E-38 | 0,395341 | 0,936 | 0,778 | 1,23E-33 | 7 TM9SF2   |
| TRAM11   | 6,85E-38 | 0,517537 | 1     | 0,998 | 1,31E-33 | 7 TRAM1    |
| PSMB2    | 6,92E-38 | 0,375087 | 0,989 | 0,973 | 1,32E-33 | 7 PSMB2    |
| NFE2L2   | 7,71E-38 | 0,426943 | 1     | 0,991 | 1,47E-33 | 7 NFE2L2   |
| CBR1     | 1,03E-37 | 0,406789 | 0,97  | 0,907 | 1,96E-33 | 7 CBR1     |
| TSPAN4   | 1,08E-37 | 0,398538 | 0,996 | 0,984 | 2,06E-33 | 7 TSPAN4   |
| DCAF13   | 1,96E-37 | 0,349345 | 0,83  | 0,617 | 3,75E-33 | 7 DCAF13   |
| NEMF     | 2,72E-37 | 0,384468 | 0,898 | 0,717 | 5,21E-33 | 7 NEMF     |
| CCT6A    | 2,92E-37 | 0,366899 | 0,966 | 0,919 | 5,58E-33 | 7 CCT6A    |
| HACD1    | 3,15E-37 | 0,41601  | 0,943 | 0,878 | 6,01E-33 | 7 HACD1    |
| MESDC2   | 3,15E-37 | 0,360113 | 0,947 | 0,829 | 6,02E-33 | 7 MESDC2   |
| PTN2     | 3,41E-37 | 0,564518 | 0,996 | 0,994 | 6,52E-33 | 7 PTN      |
| CARS     | 3,53E-37 | 0,351575 | 0,928 | 0,754 | 6,74E-33 | 7 CARS     |
| AHSA1    | 4,67E-37 | 0,323805 | 0,909 | 0,728 | 8,93E-33 | 7 AHSA1    |
| HSPA1A   | 8,14E-37 | 0,28679  | 0,758 | 0,451 | 1,56E-32 | 7 HSPA1A   |
| VTN      | 1,84E-36 | 0,432237 | 0,61  | 0,305 | 3,52E-32 | 7 VTN      |
| CCT8     | 1,87E-36 | 0,384543 | 1     | 0,993 | 3,58E-32 | 7 CCT8     |
| QSOX11   | 2,15E-36 | 0,664721 | 1     | 0,991 | 4,11E-32 | 7 QSOX1    |
| UROD     | 2,23E-36 | 0,364193 | 0,917 | 0,846 | 4,26E-32 | 7 UROD     |
| GLRX3    | 2,35E-36 | 0,358624 | 0,955 | 0,896 | 4,50E-32 | 7 GLRX3    |
| PDHA1    | 2,59E-36 | 0,297234 | 0,856 | 0,617 | 4,94E-32 | 7 PDHA1    |
| SF3B1    | 4,36E-36 | 0,398989 | 0,977 | 0,888 | 8,34E-32 | 7 SF3B1    |
| PSMG1    | 4,42E-36 | 0,338585 | 0,909 | 0,769 | 8,45E-32 | 7 PSMG1    |
| FEZ2     | 4,84E-36 | 0,374066 | 0,932 | 0,814 | 9,25E-32 | 7 FEZ2     |
| LACTB2   | 6,35E-36 | 0,407664 | 0,902 | 0,766 | 1,21E-31 | 7 LACTB2   |
| PSMC6    | 6,75E-36 | 0,37533  | 0,924 | 0,795 | 1,29E-31 | 7 PSMC6    |
| HM13     | 6,85E-36 | 0,344644 | 0,951 | 0,915 | 1,31E-31 | 7 HM13     |
| MGMT     | 7,49E-36 | 0,389564 | 0,977 | 0,981 | 1,43E-31 | 7 MGMT     |
| PRCP     | 9,52E-36 | 0,39515  | 0,936 | 0,792 | 1,82E-31 | 7 PRCP     |
| FAP      | 9,63E-36 | 0,500835 | 0,894 | 0,743 | 1,84E-31 | 7 FAP      |
| SRSF11   | 1,02E-35 | 0,384099 | 0,985 | 0,959 | 1,95E-31 | 7 SRSF11   |
| DDX51    | 1,17E-35 | 0,50656  | 1     | 0,992 | 2,24E-31 | 7 DDX5     |
| CFH      | 1,36E-35 | 0,466448 | 0,803 | 0,562 | 2,60E-31 | 7 CFH      |
| PSMD13   | 1,71E-35 | 0,354103 | 0,898 | 0,784 | 3,27E-31 | 7 PSMD13   |
| POMP1    | 1,76E-35 | 0,410628 | 1     | 1     | 3,36E-31 | 7 POMP     |
| NAE1     | 1,83E-35 | 0,352854 | 0,89  | 0,75  | 3,49E-31 | 7 NAE1     |
| SLC1A5   | 2,11E-35 | 0,495917 | 0,989 | 0,939 | 4,03E-31 | 7 SLC1A5   |
| PSMB5    | 2,37E-35 | 0,356516 | 0,992 | 0,995 | 4,53E-31 | 7 PSMB5    |
| HNRNPM   | 2,57E-35 | 0,409017 | 0,973 | 0,871 | 4,92E-31 | 7 HNRNPM   |
| ATP5H    | 2,70E-35 | 0,34147  | 0,989 | 0,995 | 5,16E-31 | 7 ATP5H    |
| TMEM165  | 3,52E-35 | 0,402253 | 1     | 0,973 | 6,74E-31 | 7 TMEM165  |
| MT-ND6   | 3,78E-35 | 0,575578 | 0,973 | 0,873 | 7,24E-31 | 7 MT-ND6   |
| EIF6     | 9,79E-35 | 0,383128 | 0,973 | 0,964 | 1,87E-30 | 7 EIF6     |
| PPP1R12A | 9,80E-35 | 0,373523 | 0,917 | 0,788 | 1,87E-30 | 7 PPP1R12A |
| TCP1     | 1,09E-34 | 0,365565 | 0,981 | 0,932 | 2,08E-30 | 7 TCP1     |
| PON2     | 1,39E-34 | 0,327188 | 0,939 | 0,797 | 2,66E-30 | 7 PON2     |
| CTSD1    | 1,60E-34 | 0,469014 | 1     | 0,98  | 3,06E-30 | 7 CTSD     |
| PPP2R1A  | 1,68E-34 | 0,329534 | 0,981 | 0,948 | 3,22E-30 | 7 PPP2R1A  |
| NUCB1    | 2,57E-34 | 0,375543 | 0,973 | 0,858 | 4,92E-30 | 7 NUCB1    |

|          |          |          |       |       |          |            |
|----------|----------|----------|-------|-------|----------|------------|
| COL6A22  | 3,06E-34 | 0,554192 | 1     | 0,998 | 5,84E-30 | 7 COL6A2   |
| SGCB     | 3,98E-34 | 0,34776  | 0,902 | 0,767 | 7,61E-30 | 7 SGCB     |
| MYO62    | 4,34E-34 | 0,593775 | 0,951 | 0,82  | 8,30E-30 | 7 MYO6     |
| NEXN     | 6,27E-34 | 0,552515 | 0,992 | 0,972 | 1,20E-29 | 7 NEXN     |
| RBM8A    | 6,67E-34 | 0,359555 | 0,928 | 0,922 | 1,27E-29 | 7 RBM8A    |
| RDX      | 8,67E-34 | 0,390829 | 0,977 | 0,943 | 1,66E-29 | 7 RDX      |
| AKAP122  | 9,73E-34 | 0,84536  | 0,992 | 0,977 | 1,86E-29 | 7 AKAP12   |
| TAGLN1   | 1,11E-33 | 0,919214 | 1     | 1     | 2,12E-29 | 7 TAGLN    |
| TMEM176B | 1,35E-33 | 0,789751 | 0,985 | 0,985 | 2,59E-29 | 7 TMEM176B |
| NOP56    | 1,50E-33 | 0,332192 | 0,883 | 0,691 | 2,86E-29 | 7 NOP56    |
| SSBP1    | 1,75E-33 | 0,36411  | 0,981 | 0,985 | 3,35E-29 | 7 SSBP1    |
| PSMD12   | 2,16E-33 | 0,325942 | 0,856 | 0,672 | 4,12E-29 | 7 PSMD12   |
| C4orf27  | 2,17E-33 | 0,311775 | 0,807 | 0,562 | 4,15E-29 | 7 C4orf27  |
| WLS      | 2,37E-33 | 0,40269  | 0,966 | 0,855 | 4,54E-29 | 7 WLS      |
| PAMR11   | 3,52E-33 | 0,448866 | 0,955 | 0,871 | 6,72E-29 | 7 PAMR1    |
| MTCH2    | 4,56E-33 | 0,357132 | 0,977 | 0,945 | 8,71E-29 | 7 MTCH2    |
| NIT2     | 4,59E-33 | 0,320755 | 0,905 | 0,779 | 8,78E-29 | 7 NIT2     |
| GBP1     | 4,96E-33 | 0,494803 | 0,92  | 0,795 | 9,48E-29 | 7 GBP1     |
| SCFD1    | 5,48E-33 | 0,349279 | 0,89  | 0,723 | 1,05E-28 | 7 SCFD1    |
| IDH3G    | 6,67E-33 | 0,317437 | 0,917 | 0,828 | 1,27E-28 | 7 IDH3G    |
| SQRDL    | 6,88E-33 | 0,448856 | 0,879 | 0,746 | 1,32E-28 | 7 SQRDL    |
| PRPF40A  | 7,13E-33 | 0,386885 | 0,947 | 0,885 | 1,36E-28 | 7 PRPF40A  |
| TUBA1B   | 7,30E-33 | 0,49745  | 0,996 | 0,995 | 1,40E-28 | 7 TUBA1B   |
| PSME1    | 7,98E-33 | 0,354881 | 0,992 | 0,986 | 1,53E-28 | 7 PSME1    |
| HSPA4    | 9,40E-33 | 0,392984 | 0,89  | 0,738 | 1,80E-28 | 7 HSPA4    |
| TSG101   | 1,00E-32 | 0,287581 | 0,909 | 0,764 | 1,92E-28 | 7 TSG101   |
| TERF2IP  | 1,19E-32 | 0,343538 | 0,909 | 0,819 | 2,28E-28 | 7 TERF2IP  |
| NDUFS3   | 1,24E-32 | 0,329465 | 0,936 | 0,874 | 2,36E-28 | 7 NDUFS3   |
| CLN5     | 1,29E-32 | 0,287374 | 0,803 | 0,554 | 2,47E-28 | 7 CLN5     |
| LACTB    | 1,65E-32 | 0,473164 | 0,917 | 0,83  | 3,16E-28 | 7 LACTB    |
| ACSL3    | 1,74E-32 | 0,409165 | 0,981 | 0,927 | 3,32E-28 | 7 ACSL3    |
| P4HB     | 1,96E-32 | 0,42171  | 1     | 0,995 | 3,75E-28 | 7 P4HB     |
| 11-sep   | 2,01E-32 | 0,440872 | 0,996 | 0,984 | 3,83E-28 | 7 11-sep   |
| SLC16A31 | 3,10E-32 | 0,488241 | 0,955 | 0,908 | 5,92E-28 | 7 SLC16A3  |
| ASPH1    | 4,38E-32 | 0,500742 | 1     | 0,985 | 8,37E-28 | 7 ASPH     |
| RAB11A   | 4,48E-32 | 0,331773 | 0,973 | 0,959 | 8,57E-28 | 7 RAB11A   |
| MRPS22   | 5,22E-32 | 0,290221 | 0,86  | 0,688 | 9,99E-28 | 7 MRPS22   |
| KDEL2    | 5,84E-32 | 0,321398 | 0,989 | 0,996 | 1,12E-27 | 7 KDEL2    |
| NUDT5    | 6,10E-32 | 0,360453 | 0,936 | 0,921 | 1,17E-27 | 7 NUDT5    |
| FDFT1    | 6,98E-32 | 0,404176 | 0,966 | 0,918 | 1,34E-27 | 7 FDFT1    |
| PRDX5    | 7,01E-32 | 0,286393 | 0,992 | 0,999 | 1,34E-27 | 7 PRDX5    |
| PSMA1    | 7,15E-32 | 0,316753 | 0,989 | 0,989 | 1,37E-27 | 7 PSMA1    |
| DDR1     | 7,94E-32 | 0,319613 | 0,924 | 0,802 | 1,52E-27 | 7 DDR1     |
| VDAC3    | 1,09E-31 | 0,311429 | 0,966 | 0,915 | 2,09E-27 | 7 VDAC3    |
| NAA20    | 1,37E-31 | 0,300641 | 0,951 | 0,885 | 2,62E-27 | 7 NAA20    |
| NOL7     | 1,47E-31 | 0,319681 | 0,966 | 0,902 | 2,82E-27 | 7 NOL7     |
| VPS26A   | 1,81E-31 | 0,302678 | 0,905 | 0,773 | 3,47E-27 | 7 VPS26A   |
| KARS     | 2,15E-31 | 0,359573 | 0,958 | 0,892 | 4,12E-27 | 7 KARS     |
| RAB7A    | 4,50E-31 | 0,326341 | 0,981 | 0,989 | 8,60E-27 | 7 RAB7A    |
| PRDX6    | 6,34E-31 | 0,399877 | 0,992 | 0,997 | 1,21E-26 | 7 PRDX6    |

|           |          |          |       |       |          |            |
|-----------|----------|----------|-------|-------|----------|------------|
| NAGK      | 6,46E-31 | 0,320409 | 0,909 | 0,765 | 1,24E-26 | 7 NAGK     |
| RBBP7     | 1,26E-30 | 0,313817 | 0,936 | 0,841 | 2,41E-26 | 7 RBBP7    |
| ILF2      | 1,54E-30 | 0,298311 | 0,939 | 0,855 | 2,95E-26 | 7 ILF2     |
| MRPL47    | 1,99E-30 | 0,328926 | 0,932 | 0,877 | 3,81E-26 | 7 MRPL47   |
| PPHLN1    | 2,04E-30 | 0,30038  | 0,928 | 0,763 | 3,89E-26 | 7 PPHLN1   |
| CLIC11    | 2,05E-30 | 0,32605  | 1     | 0,999 | 3,92E-26 | 7 CLIC1    |
| CD55      | 2,33E-30 | 0,383013 | 0,848 | 0,644 | 4,45E-26 | 7 CD55     |
| HSPA2     | 2,90E-30 | 0,467392 | 0,777 | 0,581 | 5,54E-26 | 7 HSPA2    |
| CCDC47    | 2,92E-30 | 0,268105 | 0,822 | 0,608 | 5,59E-26 | 7 CCDC47   |
| DCTN3     | 2,93E-30 | 0,309721 | 0,981 | 0,977 | 5,61E-26 | 7 DCTN3    |
| PGM3      | 3,55E-30 | 0,287977 | 0,814 | 0,608 | 6,78E-26 | 7 PGM3     |
| SMARCA1   | 3,59E-30 | 0,343132 | 0,879 | 0,68  | 6,86E-26 | 7 SMARCA1  |
| PSMD11    | 4,48E-30 | 0,33066  | 0,902 | 0,804 | 8,57E-26 | 7 PSMD11   |
| HSD17B4   | 5,16E-30 | 0,266789 | 0,739 | 0,452 | 9,87E-26 | 7 HSD17B4  |
| P3H1      | 6,37E-30 | 0,31172  | 0,833 | 0,619 | 1,22E-25 | 7 P3H1     |
| ATP1A1    | 6,59E-30 | 0,333712 | 0,92  | 0,792 | 1,26E-25 | 7 ATP1A1   |
| SPPL2A    | 6,72E-30 | 0,356    | 0,902 | 0,751 | 1,28E-25 | 7 SPPL2A   |
| SAP18     | 7,42E-30 | 0,3185   | 0,989 | 0,994 | 1,42E-25 | 7 SAP18    |
| TMBIM4    | 1,14E-29 | 0,292098 | 0,928 | 0,84  | 2,18E-25 | 7 TMBIM4   |
| ITFG1     | 1,32E-29 | 0,31015  | 0,883 | 0,697 | 2,53E-25 | 7 ITFG1    |
| TXNDC9    | 1,33E-29 | 0,316183 | 0,875 | 0,801 | 2,55E-25 | 7 TXNDC9   |
| PLPP12    | 1,51E-29 | 0,456178 | 0,947 | 0,838 | 2,89E-25 | 7 PLPP1    |
| MORF4L2   | 1,78E-29 | 0,375178 | 0,996 | 0,994 | 3,41E-25 | 7 MORF4L2  |
| SERPINB61 | 1,93E-29 | 0,340409 | 0,962 | 0,953 | 3,69E-25 | 7 SERPINB6 |
| CTSB      | 2,05E-29 | 0,387351 | 1     | 0,996 | 3,92E-25 | 7 CTSB     |
| LEPROTL1  | 2,05E-29 | 0,28876  | 0,909 | 0,83  | 3,93E-25 | 7 LEPROTL1 |
| RAN       | 2,85E-29 | 0,301779 | 0,992 | 0,997 | 5,46E-25 | 7 RAN      |
| NASP      | 3,54E-29 | 0,258741 | 0,818 | 0,596 | 6,77E-25 | 7 NASP     |
| DHX36     | 3,71E-29 | 0,376208 | 0,932 | 0,831 | 7,08E-25 | 7 DHX36    |
| PIGK      | 4,16E-29 | 0,254698 | 0,735 | 0,455 | 7,96E-25 | 7 PIGK     |
| PBDC1     | 4,24E-29 | 0,28109  | 0,803 | 0,588 | 8,11E-25 | 7 PBDC1    |
| S100A111  | 4,47E-29 | 0,331551 | 1     | 1     | 8,56E-25 | 7 S100A11  |
| PSMB7     | 4,90E-29 | 0,298454 | 1     | 0,993 | 9,37E-25 | 7 PSMB7    |
| NARS      | 5,05E-29 | 0,387928 | 0,966 | 0,911 | 9,66E-25 | 7 NARS     |
| ATP6V1H   | 5,40E-29 | 0,323435 | 0,902 | 0,757 | 1,03E-24 | 7 ATP6V1H  |
| PCK2      | 1,23E-28 | 0,336077 | 0,777 | 0,539 | 2,36E-24 | 7 PCK2     |
| WARS      | 1,25E-28 | 0,405897 | 0,985 | 0,97  | 2,38E-24 | 7 WARS     |
| DNAJC1    | 2,08E-28 | 0,35886  | 0,939 | 0,867 | 3,98E-24 | 7 DNAJC1   |
| SCCPDH    | 2,27E-28 | 0,28295  | 0,833 | 0,655 | 4,33E-24 | 7 SCCPDH   |
| ACOT9     | 2,37E-28 | 0,257671 | 0,807 | 0,601 | 4,54E-24 | 7 ACOT9    |
| BZW1      | 3,17E-28 | 0,293243 | 0,977 | 0,964 | 6,06E-24 | 7 BZW1     |
| HSPB11    | 3,32E-28 | 0,31635  | 0,939 | 0,896 | 6,35E-24 | 7 HSPB11   |
| NDUFV1    | 3,51E-28 | 0,304104 | 0,962 | 0,921 | 6,72E-24 | 7 NDUFV1   |
| VDAC1     | 4,27E-28 | 0,292561 | 1     | 0,987 | 8,17E-24 | 7 VDAC1    |
| CASP1     | 4,46E-28 | 0,387861 | 0,924 | 0,816 | 8,53E-24 | 7 CASP1    |
| CACYBP    | 5,36E-28 | 0,274055 | 0,905 | 0,806 | 1,03E-23 | 7 CACYBP   |
| PPA1      | 8,71E-28 | 0,312277 | 0,989 | 0,995 | 1,67E-23 | 7 PPA1     |
| YWHAQ     | 9,93E-28 | 0,267985 | 0,996 | 0,992 | 1,90E-23 | 7 YWHAQ    |
| CYC1      | 1,08E-27 | 0,323921 | 0,989 | 0,96  | 2,06E-23 | 7 CYC1     |
| ANXA111   | 1,10E-27 | 0,292858 | 0,996 | 0,992 | 2,11E-23 | 7 ANXA11   |

|           |          |          |       |       |          |            |
|-----------|----------|----------|-------|-------|----------|------------|
| SPARC     | 1,23E-27 | 0,485157 | 1     | 0,999 | 2,36E-23 | 7 SPARC    |
| WDR1      | 1,40E-27 | 0,426127 | 0,992 | 0,989 | 2,68E-23 | 7 WDR1     |
| ARL3      | 1,48E-27 | 0,298164 | 0,92  | 0,879 | 2,84E-23 | 7 ARL3     |
| DCN2      | 1,76E-27 | 0,585527 | 1     | 0,999 | 3,36E-23 | 7 DCN      |
| RCN1      | 2,02E-27 | 0,358947 | 0,996 | 0,989 | 3,87E-23 | 7 RCN1     |
| CHMP5     | 2,08E-27 | 0,298516 | 0,97  | 0,945 | 3,99E-23 | 7 CHMP5    |
| PARK7     | 2,47E-27 | 0,292547 | 1     | 0,999 | 4,72E-23 | 7 PARK7    |
| ALG5      | 2,53E-27 | 0,266137 | 0,917 | 0,803 | 4,85E-23 | 7 ALG5     |
| SARAF     | 2,70E-27 | 0,310344 | 1     | 0,983 | 5,16E-23 | 7 SARAF    |
| HSD17B12: | 2,85E-27 | 0,34162  | 0,924 | 0,858 | 5,45E-23 | 7 HSD17B12 |
| SRP72     | 3,64E-27 | 0,292962 | 0,936 | 0,881 | 6,97E-23 | 7 SRP72    |
| SCARB2    | 4,47E-27 | 0,353533 | 0,977 | 0,946 | 8,54E-23 | 7 SCARB2   |
| COMT      | 4,47E-27 | 0,292504 | 0,985 | 0,979 | 8,54E-23 | 7 COMT     |
| EFEMP2    | 4,49E-27 | 0,346533 | 0,996 | 0,995 | 8,59E-23 | 7 EFEMP2   |
| DCTN6     | 4,87E-27 | 0,288876 | 0,905 | 0,809 | 9,30E-23 | 7 DCTN6    |
| COLEC10   | 4,90E-27 | 0,386841 | 0,924 | 0,823 | 9,37E-23 | 7 COLEC10  |
| RCN3      | 4,94E-27 | 0,399474 | 0,833 | 0,657 | 9,45E-23 | 7 RCN3     |
| PVRL2     | 5,76E-27 | 0,354474 | 0,947 | 0,866 | 1,10E-22 | 7 PVRL2    |
| LXN2      | 5,93E-27 | 0,588121 | 0,966 | 0,936 | 1,13E-22 | 7 LXN      |
| PRKDC     | 6,29E-27 | 0,387784 | 0,932 | 0,826 | 1,20E-22 | 7 PRKDC    |
| VWA5A     | 1,06E-26 | 0,328395 | 0,856 | 0,713 | 2,03E-22 | 7 VWA5A    |
| CST32     | 1,08E-26 | 0,312339 | 1     | 0,999 | 2,07E-22 | 7 CST3     |
| CAPG      | 1,10E-26 | 0,322113 | 0,856 | 0,676 | 2,11E-22 | 7 CAPG     |
| DAD1      | 1,14E-26 | 0,311329 | 0,981 | 0,992 | 2,18E-22 | 7 DAD1     |
| SPCS1     | 1,16E-26 | 0,284107 | 0,981 | 0,991 | 2,23E-22 | 7 SPCS1    |
| SUCLA2    | 1,91E-26 | 0,257966 | 0,75  | 0,515 | 3,65E-22 | 7 SUCLA2   |
| PPIL4     | 2,68E-26 | 0,265738 | 0,788 | 0,577 | 5,13E-22 | 7 PPIL4    |
| ALDH7A1   | 2,71E-26 | 0,253486 | 0,731 | 0,467 | 5,18E-22 | 7 ALDH7A1  |
| IKBIP     | 2,94E-26 | 0,282633 | 0,92  | 0,811 | 5,62E-22 | 7 IKBIP    |
| TFPI2     | 2,95E-26 | 1,012955 | 0,943 | 0,937 | 5,64E-22 | 7 TFPI2    |
| LAP3      | 2,98E-26 | 0,288841 | 0,841 | 0,672 | 5,70E-22 | 7 LAP3     |
| ERGIC2    | 3,09E-26 | 0,306338 | 0,947 | 0,907 | 5,92E-22 | 7 ERGIC2   |
| SRRM1     | 4,55E-26 | 0,330845 | 0,97  | 0,921 | 8,70E-22 | 7 SRRM1    |
| CDC37     | 5,13E-26 | 0,304445 | 0,977 | 0,967 | 9,81E-22 | 7 CDC37    |
| SMARCA5   | 5,38E-26 | 0,356599 | 0,939 | 0,845 | 1,03E-21 | 7 SMARCA5  |
| SNX2      | 5,93E-26 | 0,260997 | 0,864 | 0,714 | 1,13E-21 | 7 SNX2     |
| PDIA4     | 7,23E-26 | 0,327886 | 0,943 | 0,783 | 1,38E-21 | 7 PDIA4    |
| TFG       | 7,30E-26 | 0,286618 | 0,97  | 0,918 | 1,40E-21 | 7 TFG      |
| TWF2      | 8,67E-26 | 0,302763 | 0,905 | 0,827 | 1,66E-21 | 7 TWF2     |
| EEA1      | 8,69E-26 | 0,399138 | 0,973 | 0,913 | 1,66E-21 | 7 EEA1     |
| TCEAL4    | 9,77E-26 | 0,384591 | 0,992 | 0,987 | 1,87E-21 | 7 TCEAL4   |
| IFI16     | 1,03E-25 | 0,363133 | 0,981 | 0,897 | 1,98E-21 | 7 IFI16    |
| NDUFB4    | 1,04E-25 | 0,292837 | 0,985 | 0,998 | 2,00E-21 | 7 NDUFB4   |
| SP100     | 1,16E-25 | 0,283992 | 0,909 | 0,779 | 2,22E-21 | 7 SP100    |
| TECR1     | 1,16E-25 | 0,296397 | 0,928 | 0,868 | 2,23E-21 | 7 TECR     |
| PIR       | 1,44E-25 | 0,298164 | 0,86  | 0,715 | 2,76E-21 | 7 PIR      |
| DLD       | 1,67E-25 | 0,25635  | 0,833 | 0,65  | 3,18E-21 | 7 DLD      |
| LARP7     | 1,78E-25 | 0,272263 | 0,864 | 0,724 | 3,41E-21 | 7 LARP7    |
| MFGE8     | 2,02E-25 | 0,473257 | 1     | 0,965 | 3,86E-21 | 7 MFGE8    |
| APMAP     | 2,86E-25 | 0,297163 | 0,879 | 0,774 | 5,46E-21 | 7 APMAP    |

|           |          |          |       |       |          |             |
|-----------|----------|----------|-------|-------|----------|-------------|
| HSD17B10  | 3,40E-25 | 0,290456 | 0,947 | 0,916 | 6,51E-21 | 7 HSD17B10  |
| UBE2L3    | 3,41E-25 | 0,302804 | 0,989 | 0,989 | 6,53E-21 | 7 UBE2L3    |
| TTC14     | 4,49E-25 | 0,312832 | 0,826 | 0,662 | 8,58E-21 | 7 TTC14     |
| COPG1     | 4,96E-25 | 0,271306 | 0,894 | 0,762 | 9,49E-21 | 7 COPG1     |
| PPIG      | 5,08E-25 | 0,282679 | 0,936 | 0,894 | 9,72E-21 | 7 PPIG      |
| GNAI3     | 5,12E-25 | 0,296612 | 0,936 | 0,861 | 9,79E-21 | 7 GNAI3     |
| ESD       | 5,14E-25 | 0,273959 | 0,992 | 0,996 | 9,83E-21 | 7 ESD       |
| TEX264    | 6,31E-25 | 0,254795 | 0,928 | 0,855 | 1,21E-20 | 7 TEX264    |
| ERP292    | 6,57E-25 | 0,324206 | 0,985 | 0,994 | 1,26E-20 | 7 ERP29     |
| FBLN5     | 7,01E-25 | 0,471927 | 0,966 | 0,937 | 1,34E-20 | 7 FBLN5     |
| ASAH11    | 8,24E-25 | 0,374653 | 0,966 | 0,944 | 1,58E-20 | 7 ASAH1     |
| DERL2     | 9,25E-25 | 0,274099 | 0,852 | 0,709 | 1,77E-20 | 7 DERL2     |
| PA2G4     | 9,52E-25 | 0,293047 | 0,951 | 0,926 | 1,82E-20 | 7 PA2G4     |
| ECHDC1    | 9,53E-25 | 0,266837 | 0,924 | 0,885 | 1,82E-20 | 7 ECHDC1    |
| GBP21     | 1,03E-24 | 0,3885   | 0,955 | 0,833 | 1,98E-20 | 7 GBP2      |
| TMED10    | 1,41E-24 | 0,264557 | 0,981 | 0,966 | 2,69E-20 | 7 TMED10    |
| ATP50     | 1,54E-24 | 0,277463 | 0,981 | 0,996 | 2,95E-20 | 7 ATP50     |
| PLS3      | 1,54E-24 | 0,331184 | 0,932 | 0,804 | 2,95E-20 | 7 PLS3      |
| COP55     | 1,59E-24 | 0,254934 | 0,867 | 0,709 | 3,04E-20 | 7 COP55     |
| MALSU1    | 1,62E-24 | 0,263308 | 0,86  | 0,759 | 3,09E-20 | 7 MALSU1    |
| PGRMC2    | 1,71E-24 | 0,329274 | 0,97  | 0,944 | 3,27E-20 | 7 PGRMC2    |
| NDUFA8    | 1,73E-24 | 0,27885  | 0,943 | 0,934 | 3,30E-20 | 7 NDUFA8    |
| C14orf166 | 1,88E-24 | 0,260852 | 0,996 | 0,996 | 3,60E-20 | 7 C14orf166 |
| UFD1L     | 1,91E-24 | 0,290109 | 0,92  | 0,851 | 3,65E-20 | 7 UFD1L     |
| PSAT1     | 2,01E-24 | 0,41745  | 0,932 | 0,841 | 3,84E-20 | 7 PSAT1     |
| RSU1      | 2,14E-24 | 0,313139 | 0,947 | 0,9   | 4,09E-20 | 7 RSU1      |
| SNW1      | 2,58E-24 | 0,27078  | 0,917 | 0,781 | 4,93E-20 | 7 SNW1      |
| SNX17     | 2,70E-24 | 0,27134  | 0,973 | 0,922 | 5,16E-20 | 7 SNX17     |
| TBCB      | 3,48E-24 | 0,283042 | 0,955 | 0,956 | 6,66E-20 | 7 TBCB      |
| TXN       | 4,64E-24 | 0,394627 | 1     | 1     | 8,88E-20 | 7 TXN       |
| PGAM1     | 5,65E-24 | 0,283015 | 1     | 0,994 | 1,08E-19 | 7 PGAM1     |
| CD46      | 5,82E-24 | 0,307422 | 0,936 | 0,847 | 1,11E-19 | 7 CD46      |
| IDH3B     | 6,75E-24 | 0,266892 | 0,852 | 0,732 | 1,29E-19 | 7 IDH3B     |
| TRIP6     | 6,87E-24 | 0,317754 | 0,996 | 0,968 | 1,31E-19 | 7 TRIP6     |
| PSMB9     | 7,61E-24 | 0,328106 | 0,909 | 0,835 | 1,46E-19 | 7 PSMB9     |
| JKAMP     | 8,05E-24 | 0,286659 | 0,86  | 0,72  | 1,54E-19 | 7 JKAMP     |
| RRBP1     | 9,71E-24 | 0,33558  | 1     | 0,988 | 1,86E-19 | 7 RRBP1     |
| PPIC1     | 1,03E-23 | 0,298301 | 0,966 | 0,942 | 1,96E-19 | 7 PPIC      |
| MRPS5     | 1,24E-23 | 0,26815  | 0,883 | 0,779 | 2,37E-19 | 7 MRPS5     |
| MRPL13    | 1,35E-23 | 0,285796 | 0,917 | 0,881 | 2,59E-19 | 7 MRPL13    |
| PMPCB     | 1,48E-23 | 0,279363 | 0,936 | 0,848 | 2,82E-19 | 7 PMPCB     |
| SDHB      | 1,64E-23 | 0,2789   | 0,902 | 0,879 | 3,13E-19 | 7 SDHB      |
| RAB1A     | 1,67E-23 | 0,26954  | 0,966 | 0,981 | 3,20E-19 | 7 RAB1A     |
| RTCB      | 1,68E-23 | 0,297295 | 0,902 | 0,837 | 3,21E-19 | 7 RTCB      |
| STIP1     | 1,69E-23 | 0,263296 | 0,837 | 0,649 | 3,24E-19 | 7 STIP1     |
| PPA2      | 1,99E-23 | 0,277595 | 0,83  | 0,716 | 3,80E-19 | 7 PPA2      |
| RBM25     | 2,42E-23 | 0,362956 | 0,966 | 0,911 | 4,63E-19 | 7 RBM25     |
| SFT2D1    | 2,47E-23 | 0,270448 | 0,913 | 0,867 | 4,73E-19 | 7 SFT2D1    |
| ACADVL    | 3,30E-23 | 0,299437 | 0,867 | 0,726 | 6,31E-19 | 7 ACADVL    |
| YIPF3     | 5,28E-23 | 0,285558 | 0,955 | 0,947 | 1,01E-18 | 7 YIPF3     |

|          |          |          |       |       |          |            |
|----------|----------|----------|-------|-------|----------|------------|
| CLPTM1   | 5,31E-23 | 0,251286 | 0,871 | 0,718 | 1,02E-18 | 7 CLPTM1   |
| TUBB     | 5,33E-23 | 0,481173 | 1     | 0,999 | 1,02E-18 | 7 TUBB     |
| BRIX11   | 5,54E-23 | 0,427104 | 0,905 | 0,809 | 1,06E-18 | 7 BRIX1    |
| APP1     | 6,81E-23 | 0,469655 | 0,996 | 0,976 | 1,30E-18 | 7 APP      |
| PWP1     | 6,96E-23 | 0,26579  | 0,905 | 0,798 | 1,33E-18 | 7 PWP1     |
| IDI11    | 8,21E-23 | 0,454273 | 0,955 | 0,888 | 1,57E-18 | 7 IDI1     |
| DNAJA2   | 1,04E-22 | 0,2594   | 0,894 | 0,806 | 2,00E-18 | 7 DNAJA2   |
| TXNDC15  | 1,15E-22 | 0,255035 | 0,852 | 0,715 | 2,20E-18 | 7 TXNDC15  |
| EIF2S2   | 1,45E-22 | 0,274266 | 1     | 0,995 | 2,77E-18 | 7 EIF2S2   |
| SAR1A    | 1,48E-22 | 0,295577 | 0,955 | 0,93  | 2,84E-18 | 7 SAR1A    |
| TPI11    | 1,53E-22 | 0,266757 | 0,992 | 0,996 | 2,93E-18 | 7 TPI1     |
| SEC63    | 1,66E-22 | 0,275471 | 0,962 | 0,936 | 3,18E-18 | 7 SEC63    |
| GPNMB2   | 1,83E-22 | 0,526451 | 0,973 | 0,93  | 3,51E-18 | 7 GPNMB    |
| NDUFA4   | 2,28E-22 | 0,311597 | 0,996 | 1     | 4,35E-18 | 7 NDUFA4   |
| TUBB61   | 2,78E-22 | 0,45705  | 0,989 | 0,971 | 5,32E-18 | 7 TUBB6    |
| ISG15    | 3,32E-22 | 0,302897 | 0,962 | 0,941 | 6,35E-18 | 7 ISG15    |
| GCLM1    | 3,57E-22 | 0,506231 | 0,977 | 0,964 | 6,82E-18 | 7 GCLM     |
| TUBA1C   | 3,66E-22 | 0,414438 | 0,966 | 0,959 | 7,00E-18 | 7 TUBA1C   |
| PSG4     | 5,00E-22 | 0,462302 | 0,985 | 0,954 | 9,57E-18 | 7 PSG4     |
| SPG20    | 5,70E-22 | 0,292521 | 0,939 | 0,857 | 1,09E-17 | 7 SPG20    |
| PLIN21   | 5,75E-22 | 0,365785 | 0,955 | 0,911 | 1,10E-17 | 7 PLIN2    |
| LMAN21   | 6,50E-22 | 0,267272 | 0,985 | 0,972 | 1,24E-17 | 7 LMAN2    |
| FHL22    | 6,81E-22 | 0,365548 | 1     | 0,996 | 1,30E-17 | 7 FHL2     |
| EZR      | 8,35E-22 | 0,281668 | 0,837 | 0,661 | 1,60E-17 | 7 EZR      |
| PSMC5    | 1,05E-21 | 0,257077 | 0,962 | 0,941 | 2,01E-17 | 7 PSMC5    |
| DYNC1H1  | 1,13E-21 | 0,387743 | 0,958 | 0,926 | 2,16E-17 | 7 DYNC1H1  |
| SBDS     | 1,21E-21 | 0,291133 | 0,985 | 0,967 | 2,31E-17 | 7 SBDS     |
| LARS     | 1,26E-21 | 0,289295 | 0,898 | 0,776 | 2,41E-17 | 7 LARS     |
| BCLAF1   | 1,33E-21 | 0,30498  | 0,928 | 0,87  | 2,54E-17 | 7 BCLAF1   |
| MFSD10   | 1,48E-21 | 0,261075 | 0,928 | 0,85  | 2,83E-17 | 7 MFSD10   |
| AARS     | 1,51E-21 | 0,25746  | 0,848 | 0,691 | 2,89E-17 | 7 AARS     |
| SARS     | 1,57E-21 | 0,276642 | 0,985 | 0,979 | 3,01E-17 | 7 SARS     |
| NDUFA12  | 1,68E-21 | 0,268237 | 0,917 | 0,929 | 3,20E-17 | 7 NDUFA12  |
| ACO1     | 3,86E-21 | 0,296079 | 0,939 | 0,872 | 7,38E-17 | 7 ACO1     |
| UCHL3    | 5,91E-21 | 0,251353 | 0,867 | 0,779 | 1,13E-16 | 7 UCHL3    |
| CPQ      | 6,42E-21 | 0,253979 | 0,727 | 0,514 | 1,23E-16 | 7 CPQ      |
| KIAA1033 | 6,43E-21 | 0,324459 | 0,803 | 0,668 | 1,23E-16 | 7 KIAA1033 |
| DARS     | 6,82E-21 | 0,262317 | 0,913 | 0,791 | 1,30E-16 | 7 DARS     |
| THRAP3   | 7,15E-21 | 0,251497 | 0,955 | 0,912 | 1,37E-16 | 7 THRAP3   |
| HNRNPD   | 7,28E-21 | 0,283691 | 0,955 | 0,923 | 1,39E-16 | 7 HNRNPD   |
| SNRNP70  | 8,43E-21 | 0,291479 | 0,943 | 0,877 | 1,61E-16 | 7 SNRNP70  |
| USP14    | 1,62E-20 | 0,269612 | 0,871 | 0,772 | 3,10E-16 | 7 USP14    |
| TXNRD12  | 1,85E-20 | 0,412471 | 1     | 0,997 | 3,54E-16 | 7 TXNRD1   |
| WBSCR22  | 2,14E-20 | 0,25065  | 0,902 | 0,812 | 4,10E-16 | 7 WBSCR22  |
| UGP2     | 2,20E-20 | 0,281789 | 0,92  | 0,865 | 4,20E-16 | 7 UGP2     |
| PTS      | 3,40E-20 | 0,284381 | 0,924 | 0,902 | 6,49E-16 | 7 PTS      |
| GLA      | 7,17E-20 | 0,255628 | 0,739 | 0,551 | 1,37E-15 | 7 GLA      |
| TOP1     | 7,97E-20 | 0,285305 | 0,932 | 0,813 | 1,52E-15 | 7 TOP1     |
| NCSTN    | 1,01E-19 | 0,254951 | 0,803 | 0,658 | 1,94E-15 | 7 NCSTN    |
| CYB5R3   | 1,72E-19 | 0,265055 | 1     | 0,991 | 3,28E-15 | 7 CYB5R3   |

|          |          |          |       |       |          |            |
|----------|----------|----------|-------|-------|----------|------------|
| NRBP1    | 2,14E-19 | 0,272097 | 0,905 | 0,841 | 4,10E-15 | 7 NRBP1    |
| TRAPPC2L | 2,17E-19 | 0,280315 | 0,939 | 0,977 | 4,14E-15 | 7 TRAPPC2L |
| SEC31A   | 2,26E-19 | 0,340263 | 0,981 | 0,949 | 4,32E-15 | 7 SEC31A   |
| ME1      | 2,42E-19 | 0,322742 | 0,883 | 0,829 | 4,63E-15 | 7 ME1      |
| UBA1     | 2,56E-19 | 0,263546 | 0,89  | 0,789 | 4,90E-15 | 7 UBA1     |
| ITM2C    | 4,29E-19 | 0,277851 | 0,955 | 0,922 | 8,21E-15 | 7 ITM2C    |
| CFD3     | 4,31E-19 | 0,64858  | 0,97  | 0,949 | 8,24E-15 | 7 CFD      |
| HNRNPF   | 4,47E-19 | 0,252096 | 0,977 | 0,953 | 8,55E-15 | 7 HNRNPF   |
| TUBA4A   | 7,68E-19 | 0,257043 | 0,723 | 0,545 | 1,47E-14 | 7 TUBA4A   |
| RARRES33 | 9,27E-19 | 0,382532 | 0,973 | 0,949 | 1,77E-14 | 7 RARRES3  |
| LAMC11   | 1,18E-18 | 0,5987   | 0,989 | 0,955 | 2,25E-14 | 7 LAMC1    |
| MANF     | 1,20E-18 | 0,267809 | 0,958 | 0,873 | 2,29E-14 | 7 MANF     |
| EIF3A    | 1,30E-18 | 0,396743 | 0,989 | 0,983 | 2,48E-14 | 7 EIF3A    |
| NDN      | 1,35E-18 | 0,365352 | 0,799 | 0,765 | 2,57E-14 | 7 NDN      |
| KDELR3   | 1,46E-18 | 0,265767 | 0,902 | 0,865 | 2,79E-14 | 7 KDELR3   |
| AKR7A2   | 1,48E-18 | 0,260091 | 0,951 | 0,887 | 2,83E-14 | 7 AKR7A2   |
| ATP5G31  | 1,63E-18 | 0,276845 | 0,981 | 0,999 | 3,12E-14 | 7 ATP5G3   |
| ATPIF1   | 2,32E-18 | 0,250241 | 0,985 | 0,991 | 4,44E-14 | 7 ATPIF1   |
| DNAJC7   | 2,74E-18 | 0,258078 | 0,939 | 0,898 | 5,24E-14 | 7 DNAJC7   |
| DHCR71   | 2,81E-18 | 0,282146 | 0,852 | 0,705 | 5,38E-14 | 7 DHCR7    |
| MYH10    | 3,06E-18 | 0,251818 | 0,78  | 0,632 | 5,85E-14 | 7 MYH10    |
| WBP5     | 3,09E-18 | 0,256641 | 0,989 | 0,996 | 5,91E-14 | 7 WBP5     |
| CAPN1    | 3,21E-18 | 0,257918 | 0,902 | 0,846 | 6,15E-14 | 7 CAPN1    |
| NEU11    | 4,75E-18 | 0,268067 | 0,913 | 0,857 | 9,09E-14 | 7 NEU1     |
| IDH1     | 5,81E-18 | 0,285719 | 0,981 | 0,937 | 1,11E-13 | 7 IDH1     |
| MSMO11   | 8,61E-18 | 0,329342 | 0,871 | 0,798 | 1,65E-13 | 7 MSMO1    |
| FILIP1L  | 1,12E-17 | 0,398786 | 0,973 | 0,95  | 2,15E-13 | 7 FILIP1L  |
| CERCAM   | 1,14E-17 | 0,277309 | 0,92  | 0,846 | 2,17E-13 | 7 CERCAM   |
| ADAM9    | 1,54E-17 | 0,387603 | 0,981 | 0,967 | 2,95E-13 | 7 ADAM9    |
| CAP1     | 1,55E-17 | 0,310314 | 0,996 | 0,992 | 2,96E-13 | 7 CAP1     |
| MAP1B1   | 1,76E-17 | 0,548982 | 0,992 | 0,991 | 3,37E-13 | 7 MAP1B    |
| EDNRB1   | 1,87E-17 | 0,262219 | 0,712 | 0,526 | 3,57E-13 | 7 EDNRB    |
| 02-sep   | 2,17E-17 | 0,267547 | 0,977 | 0,98  | 4,16E-13 | 7 02-sep   |
| XBP1     | 2,74E-17 | 0,258158 | 0,966 | 0,921 | 5,24E-13 | 7 XBP1     |
| PDCD6IP  | 3,92E-17 | 0,286196 | 0,879 | 0,795 | 7,49E-13 | 7 PDCD6IP  |
| COL1A21  | 5,00E-17 | 0,530356 | 1     | 0,999 | 9,55E-13 | 7 COL1A2   |
| SNAPC1   | 6,50E-17 | 0,330564 | 0,723 | 0,577 | 1,24E-12 | 7 SNAPC1   |
| MAP1A    | 7,31E-17 | 0,327307 | 0,985 | 0,949 | 1,40E-12 | 7 MAP1A    |
| EBP1     | 8,05E-17 | 0,268562 | 0,811 | 0,659 | 1,54E-12 | 7 EBP1     |
| GSPT1    | 1,63E-16 | 0,255422 | 0,902 | 0,861 | 3,12E-12 | 7 GSPT1    |
| BST1     | 1,73E-16 | 0,280355 | 0,833 | 0,718 | 3,31E-12 | 7 BST1     |
| STOM1    | 2,73E-16 | 0,251825 | 0,996 | 0,996 | 5,23E-12 | 7 STOM     |
| GFPT1    | 2,79E-16 | 0,263538 | 0,807 | 0,71  | 5,33E-12 | 7 GFPT1    |
| THOC2    | 3,73E-16 | 0,258965 | 0,845 | 0,719 | 7,13E-12 | 7 THOC2    |
| HNRNPA3  | 4,94E-16 | 0,272654 | 0,992 | 0,969 | 9,44E-12 | 7 HNRNPA3  |
| CAPN2    | 5,62E-16 | 0,289712 | 0,989 | 0,984 | 1,07E-11 | 7 CAPN2    |
| CANX     | 5,72E-16 | 0,372316 | 1     | 0,983 | 1,09E-11 | 7 CANX     |
| PARVA    | 6,28E-16 | 0,264305 | 0,977 | 0,952 | 1,20E-11 | 7 PARVA    |
| OLFML3   | 7,60E-16 | 0,284724 | 0,879 | 0,767 | 1,45E-11 | 7 OLFML3   |
| DPP4     | 8,26E-16 | 0,264293 | 0,833 | 0,711 | 1,58E-11 | 7 DPP4     |

|           |          |          |       |       |          |             |
|-----------|----------|----------|-------|-------|----------|-------------|
| PMP22     | 8,51E-16 | 0,297342 | 0,989 | 0,979 | 1,63E-11 | 7 PMP22     |
| LAMB11    | 8,90E-16 | 0,354769 | 0,928 | 0,881 | 1,70E-11 | 7 LAMB1     |
| PDLIM71   | 8,98E-16 | 0,291945 | 1     | 0,995 | 1,72E-11 | 7 PDLIM7    |
| CAND1     | 9,72E-16 | 0,373218 | 0,947 | 0,885 | 1,86E-11 | 7 CAND1     |
| PRKCSH    | 1,33E-15 | 0,285596 | 0,981 | 0,944 | 2,55E-11 | 7 PRKCSH    |
| CSRP21    | 1,89E-15 | 0,346762 | 0,89  | 0,816 | 3,62E-11 | 7 CSRP2     |
| ATRX      | 2,08E-15 | 0,383324 | 0,955 | 0,919 | 3,97E-11 | 7 ATRX      |
| LOX       | 3,53E-15 | 0,396411 | 0,966 | 0,932 | 6,76E-11 | 7 LOX       |
| CADM1     | 4,33E-15 | 0,250851 | 0,723 | 0,558 | 8,28E-11 | 7 CADM1     |
| NME11     | 4,49E-15 | 0,254527 | 0,951 | 0,939 | 8,59E-11 | 7 NME1      |
| PDPN1     | 4,50E-15 | 0,293853 | 0,894 | 0,857 | 8,61E-11 | 7 PDPN      |
| NPTN      | 5,03E-15 | 0,300136 | 0,894 | 0,817 | 9,62E-11 | 7 NPTN      |
| TNFRSF11B | 5,44E-15 | 0,707045 | 0,932 | 0,9   | 1,04E-10 | 7 TNFRSF11B |
| TGFBI2    | 7,49E-15 | 0,327027 | 0,996 | 0,99  | 1,43E-10 | 7 TGFBI     |
| PALLD     | 8,87E-15 | 0,38838  | 1     | 0,996 | 1,70E-10 | 7 PALLD     |
| TKT2      | 1,60E-14 | 0,268694 | 1     | 0,998 | 3,06E-10 | 7 TKT       |
| ITGA1     | 1,96E-14 | 0,473719 | 0,917 | 0,853 | 3,76E-10 | 7 ITGA1     |
| PRSS23    | 2,16E-14 | 0,299509 | 0,917 | 0,871 | 4,12E-10 | 7 PRSS23    |
| NID2      | 2,47E-14 | 0,331767 | 0,852 | 0,8   | 4,72E-10 | 7 NID2      |
| GOLGB1    | 2,60E-14 | 0,311236 | 0,917 | 0,84  | 4,98E-10 | 7 GOLGB1    |
| USP47     | 2,62E-14 | 0,269108 | 0,811 | 0,703 | 5,01E-10 | 7 USP47     |
| NAMPT1    | 2,89E-14 | 0,259481 | 0,928 | 0,862 | 5,52E-10 | 7 NAMPT     |
| PGD       | 4,85E-14 | 0,274848 | 0,985 | 0,97  | 9,27E-10 | 7 PGD       |
| HIF1A     | 5,34E-14 | 0,348674 | 0,966 | 0,918 | 1,02E-09 | 7 HIF1A     |
| FSTL11    | 5,94E-14 | 0,493044 | 1     | 0,994 | 1,14E-09 | 7 FSTL1     |
| KTN1      | 1,20E-13 | 0,32158  | 1     | 0,993 | 2,30E-09 | 7 KTN1      |
| LMO72     | 1,51E-13 | 0,430533 | 0,977 | 0,946 | 2,89E-09 | 7 LMO7      |
| GJA11     | 1,55E-13 | 0,333127 | 0,917 | 0,835 | 2,96E-09 | 7 GJA1      |
| ATP2B1    | 2,12E-13 | 0,340596 | 0,996 | 0,985 | 4,05E-09 | 7 ATP2B1    |
| LIMCH1    | 4,39E-13 | 0,288354 | 0,977 | 0,941 | 8,40E-09 | 7 LIMCH1    |
| IL32      | 1,00E-12 | 0,378136 | 0,792 | 0,754 | 1,92E-08 | 7 IL32      |
| DDB1      | 1,21E-12 | 0,274893 | 0,845 | 0,783 | 2,32E-08 | 7 DDB1      |
| LOXL2     | 1,60E-12 | 0,424912 | 0,856 | 0,782 | 3,07E-08 | 7 LOXL2     |
| F31       | 1,75E-12 | 0,549336 | 0,871 | 0,76  | 3,35E-08 | 7 F3        |
| SEC23A    | 2,45E-12 | 0,285295 | 0,947 | 0,874 | 4,68E-08 | 7 SEC23A    |
| CKAP4     | 4,14E-12 | 0,309671 | 0,989 | 0,986 | 7,92E-08 | 7 CKAP4     |
| KLC1      | 6,16E-12 | 0,259923 | 0,845 | 0,777 | 1,18E-07 | 7 KLC1      |
| IGFBP2    | 6,53E-12 | 0,562721 | 0,962 | 0,952 | 1,25E-07 | 7 IGFBP2    |
| VMP1      | 8,20E-12 | 0,307843 | 0,958 | 0,915 | 1,57E-07 | 7 VMP1      |
| EIF5B     | 1,02E-11 | 0,31558  | 0,973 | 0,972 | 1,95E-07 | 7 EIF5B     |
| STC21     | 1,81E-11 | 0,406122 | 0,92  | 0,873 | 3,46E-07 | 7 STC2      |
| MAP4      | 2,69E-11 | 0,264081 | 0,981 | 0,977 | 5,14E-07 | 7 MAP4      |
| S100A101  | 2,85E-11 | 0,265209 | 1     | 0,997 | 5,45E-07 | 7 S100A10   |
| GDF151    | 4,70E-11 | 0,479532 | 0,898 | 0,844 | 8,99E-07 | 7 GDF15     |
| TPBG      | 7,04E-11 | 0,262578 | 0,928 | 0,853 | 1,35E-06 | 7 TPBG      |
| ARHGAP29  | 9,61E-11 | 0,277194 | 0,92  | 0,862 | 1,84E-06 | 7 ARHGAP29  |
| LAMA41    | 1,01E-10 | 0,329672 | 0,966 | 0,919 | 1,94E-06 | 7 LAMA4     |
| MMP142    | 1,37E-10 | 0,267528 | 0,973 | 0,951 | 2,63E-06 | 7 MMP14     |
| ACTR2     | 1,82E-10 | 0,258856 | 0,973 | 0,945 | 3,47E-06 | 7 ACTR2     |
| MYADM     | 1,89E-10 | 0,26795  | 0,977 | 0,941 | 3,62E-06 | 7 MYADM     |



|          |          |          |       |       |          |            |
|----------|----------|----------|-------|-------|----------|------------|
| CYR611   | 2,00E-10 | 0,501226 | 0,985 | 0,964 | 3,83E-06 | 7 CYR61    |
| SQLE1    | 2,17E-10 | 0,293671 | 0,973 | 0,924 | 4,14E-06 | 7 SQLE     |
| SLC2A1   | 2,38E-10 | 0,250471 | 0,564 | 0,41  | 4,54E-06 | 7 SLC2A1   |
| IQGAP1   | 2,99E-10 | 0,277522 | 0,913 | 0,873 | 5,72E-06 | 7 IQGAP1   |
| COL1A11  | 3,14E-10 | 0,406127 | 1     | 0,997 | 6,00E-06 | 7 COL1A1   |
| PAPSS22  | 3,56E-10 | 0,369849 | 0,951 | 0,919 | 6,80E-06 | 7 PAPSS2   |
| SCAF11   | 6,81E-10 | 0,271264 | 0,951 | 0,923 | 1,30E-05 | 7 SCAF11   |
| ARID5B   | 1,96E-09 | 0,270382 | 1     | 0,992 | 3,75E-05 | 7 ARID5B   |
| P3H21    | 2,80E-09 | 0,293791 | 0,795 | 0,706 | 5,36E-05 | 7 P3H2     |
| CTGF1    | 3,44E-09 | 0,514248 | 0,92  | 0,905 | 6,58E-05 | 7 CTGF     |
| TNPO1    | 5,59E-09 | 0,309139 | 0,958 | 0,956 | 0,000107 | 7 TNPO1    |
| SVEP1    | 6,75E-09 | 0,343506 | 0,883 | 0,835 | 0,000129 | 7 SVEP1    |
| PCYOX11  | 9,03E-09 | 0,261189 | 0,947 | 0,888 | 0,000173 | 7 PCYOX1   |
| IARS     | 1,21E-08 | 0,266913 | 0,932 | 0,899 | 0,000231 | 7 IARS     |
| GLS      | 1,56E-08 | 0,344894 | 0,864 | 0,804 | 0,000297 | 7 GLS      |
| TMEM471  | 1,75E-08 | 0,355166 | 0,905 | 0,832 | 0,000334 | 7 TMEM47   |
| STAT12   | 1,87E-08 | 0,261874 | 0,97  | 0,948 | 0,000358 | 7 STAT1    |
| RARRES23 | 1,92E-08 | 0,374014 | 0,996 | 0,985 | 0,000368 | 7 RARRES2  |
| OSMR     | 2,01E-08 | 0,298074 | 0,845 | 0,775 | 0,000385 | 7 OSMR     |
| MMP22    | 2,02E-08 | 0,257199 | 1     | 0,991 | 0,000386 | 7 MMP2     |
| FLNA     | 2,64E-08 | 0,633547 | 0,992 | 0,994 | 0,000504 | 7 FLNA     |
| ITGAV1   | 2,72E-08 | 0,373734 | 0,936 | 0,882 | 0,00052  | 7 ITGAV    |
| SMTN     | 6,43E-08 | 0,267909 | 0,742 | 0,643 | 0,00123  | 7 SMTN     |
| SBSPON   | 1,35E-07 | 0,285005 | 0,913 | 0,879 | 0,002575 | 7 SBSPON   |
| TFRC     | 1,36E-07 | 0,37965  | 0,947 | 0,911 | 0,002592 | 7 TFRC     |
| MYLK1    | 1,39E-07 | 0,341343 | 1     | 0,999 | 0,002667 | 7 MYLK     |
| PTGDS2   | 1,79E-07 | 0,549015 | 0,902 | 0,9   | 0,003414 | 7 PTGDS    |
| SPON22   | 2,35E-07 | 0,320908 | 0,992 | 0,997 | 0,004498 | 7 SPON2    |
| TMEM176/ | 2,81E-07 | 0,402043 | 0,962 | 0,967 | 0,00538  | 7 TMEM176A |
| IGFBP32  | 3,01E-07 | 0,308563 | 0,837 | 0,77  | 0,00575  | 7 IGFBP3   |
| COL3A12  | 3,21E-07 | 0,368693 | 1     | 0,992 | 0,006144 | 7 COL3A1   |
| SLC38A1  | 5,02E-07 | 0,289564 | 0,973 | 0,952 | 0,009606 | 7 SLC38A1  |
| WNT5A1   | 5,22E-07 | 0,325332 | 0,852 | 0,815 | 0,00999  | 7 WNT5A    |
| PRNP1    | 9,49E-07 | 0,358602 | 0,989 | 0,98  | 0,018147 | 7 PRNP     |
| CES1     | 1,04E-06 | 0,28628  | 0,265 | 0,158 | 0,019938 | 7 CES1     |
| DST1     | 1,81E-06 | 0,350062 | 1     | 0,989 | 0,034694 | 7 DST      |
| TRPA1    | 4,95E-06 | 0,318182 | 0,867 | 0,827 | 0,094718 | 7 TRPA1    |
| MACF1    | 5,32E-06 | 0,351524 | 0,955 | 0,93  | 0,101762 | 7 MACF1    |
| RDH101   | 6,48E-06 | 0,302679 | 0,962 | 0,945 | 0,12395  | 7 RDH10    |
| COL6A11  | 9,59E-06 | 0,335603 | 1     | 0,996 | 0,183454 | 7 COL6A1   |
| ADAMTS1  | 9,98E-06 | 0,286317 | 0,883 | 0,839 | 0,190831 | 7 ADAMTS1  |
| MGP2     | 1,40E-05 | 0,33269  | 0,867 | 0,83  | 0,268126 | 7 MGP      |
| THBS11   | 1,61E-05 | 0,535245 | 0,992 | 0,981 | 0,307027 | 7 THBS1    |
| THBS21   | 1,87E-05 | 0,501583 | 0,939 | 0,928 | 0,357375 | 7 THBS2    |
| SLC7A112 | 2,09E-05 | 0,279058 | 0,848 | 0,815 | 0,400474 | 7 SLC7A11  |
| VCL      | 2,49E-05 | 0,354986 | 0,989 | 0,968 | 0,475699 | 7 VCL      |
| CTSK2    | 5,81E-05 | 0,318236 | 0,932 | 0,902 | 1        | 7 CTSK     |
| FLNB     | 7,09E-05 | 0,262367 | 0,826 | 0,773 | 1        | 7 FLNB     |
| CLTC     | 7,20E-05 | 0,324727 | 0,958 | 0,957 | 1        | 7 CLTC     |
| FN12     | 0,000122 | 0,494728 | 1     | 0,996 | 1        | 7 FN1      |

|          |          |          |       |       |          |            |
|----------|----------|----------|-------|-------|----------|------------|
| N4BP2L21 | 0,000144 | 0,251509 | 0,992 | 0,972 | 1        | 7 N4BP2L2  |
| KRT182   | 0,00016  | 0,487556 | 0,799 | 0,778 | 1        | 7 KRT18    |
| DKK11    | 0,000234 | 0,260181 | 0,761 | 0,687 | 1        | 7 DKK1     |
| CCND12   | 0,000275 | 0,251676 | 0,955 | 0,968 | 1        | 7 CCND1    |
| CRIM11   | 0,000281 | 0,349094 | 0,902 | 0,873 | 1        | 7 CRIM1    |
| FBN11    | 0,000299 | 0,29759  | 0,902 | 0,876 | 1        | 7 FBN1     |
| COL12A1  | 0,000327 | 0,280683 | 0,958 | 0,943 | 1        | 7 COL12A1  |
| COL5A21  | 0,000669 | 0,355102 | 0,989 | 0,975 | 1        | 7 COL5A2   |
| SULF12   | 0,000992 | 0,269715 | 0,754 | 0,727 | 1        | 7 SULF1    |
| A2M1     | 0,001699 | 0,337902 | 0,386 | 0,313 | 1        | 7 A2M      |
| SLC38A21 | 0,0067   | 0,285901 | 0,981 | 0,973 | 1        | 7 SLC38A2  |
| IGF21    | 3,48E-56 | 0,74684  | 0,995 | 0,977 | 6,66E-52 | 8 IGF2     |
| FLNA1    | 7,62E-55 | 0,587664 | 1     | 0,994 | 1,46E-50 | 8 FLNA     |
| RPLP11   | 1,30E-48 | 0,321457 | 1     | 1     | 2,48E-44 | 8 RPLP1    |
| FSTL12   | 1,20E-46 | 0,591353 | 0,995 | 0,994 | 2,30E-42 | 8 FSTL1    |
| CAMK2N11 | 2,51E-42 | 0,51076  | 0,995 | 0,992 | 4,80E-38 | 8 CAMK2N1  |
| RALGPS2  | 2,28E-39 | 0,42223  | 0,977 | 0,869 | 4,35E-35 | 8 RALGPS2  |
| PRRX2    | 9,60E-38 | 0,431543 | 0,875 | 0,605 | 1,84E-33 | 8 PRRX2    |
| GTF2I    | 1,08E-37 | 0,44555  | 0,995 | 0,985 | 2,06E-33 | 8 GTF2I    |
| NR2F2    | 3,91E-37 | 0,470369 | 0,991 | 0,947 | 7,48E-33 | 8 NR2F2    |
| S100A4   | 4,61E-37 | 0,608074 | 0,963 | 0,772 | 8,82E-33 | 8 S100A4   |
| VCL1     | 6,96E-35 | 0,405723 | 1     | 0,967 | 1,33E-30 | 8 VCL      |
| TIMP22   | 7,29E-35 | 0,454774 | 0,995 | 0,991 | 1,39E-30 | 8 TIMP2    |
| SBSPON1  | 2,36E-34 | 0,623948 | 0,968 | 0,875 | 4,51E-30 | 8 SBSPON   |
| IMPA2    | 2,89E-34 | 0,327423 | 0,722 | 0,377 | 5,53E-30 | 8 IMPA2    |
| CARD16   | 9,42E-34 | 0,47393  | 0,912 | 0,66  | 1,80E-29 | 8 CARD16   |
| S1PR3    | 3,22E-33 | 0,382902 | 0,921 | 0,783 | 6,15E-29 | 8 S1PR3    |
| BRI3     | 3,80E-33 | 0,423546 | 0,995 | 0,993 | 7,26E-29 | 8 BRI3     |
| PRRX11   | 4,94E-33 | 0,391852 | 0,94  | 0,673 | 9,44E-29 | 8 PRRX1    |
| IGFBP21  | 3,59E-32 | 0,550142 | 0,986 | 0,95  | 6,87E-28 | 8 IGFBP2   |
| C12orf75 | 3,78E-32 | 0,552427 | 1     | 0,996 | 7,23E-28 | 8 C12orf75 |
| EPHB6    | 4,88E-32 | 0,284965 | 0,708 | 0,344 | 9,34E-28 | 8 EPHB6    |
| IGFBP4   | 1,47E-31 | 0,405636 | 1     | 0,998 | 2,82E-27 | 8 IGFBP4   |
| TFRC1    | 1,50E-31 | 0,461648 | 0,968 | 0,91  | 2,87E-27 | 8 TFRC     |
| MYADM1   | 2,58E-31 | 0,404369 | 0,981 | 0,941 | 4,94E-27 | 8 MYADM    |
| NFASC    | 3,33E-31 | 0,360372 | 0,935 | 0,721 | 6,36E-27 | 8 NFASC    |
| ITGAV2   | 8,89E-31 | 0,438504 | 0,981 | 0,88  | 1,70E-26 | 8 ITGAV    |
| ADGRD1   | 3,06E-30 | 0,258428 | 0,833 | 0,507 | 5,84E-26 | 8 ADGRD1   |
| RPS21    | 3,41E-30 | 0,320779 | 1     | 1     | 6,52E-26 | 8 RPS2     |
| AHNAK    | 4,78E-30 | 0,352533 | 1     | 0,989 | 9,13E-26 | 8 AHNAK    |
| MYH9     | 1,58E-29 | 0,344283 | 0,995 | 0,992 | 3,02E-25 | 8 MYH9     |
| TP53I111 | 2,45E-29 | 0,416278 | 0,963 | 0,902 | 4,68E-25 | 8 TP53I11  |
| ANTXR1   | 1,19E-28 | 0,388625 | 0,981 | 0,952 | 2,28E-24 | 8 ANTXR1   |
| GNG121   | 1,61E-28 | 0,368195 | 0,981 | 0,975 | 3,08E-24 | 8 GNG12    |
| LPP      | 1,07E-27 | 0,350743 | 0,995 | 0,962 | 2,04E-23 | 8 LPP      |
| COL6A12  | 4,44E-27 | 0,354362 | 1     | 0,996 | 8,48E-23 | 8 COL6A1   |
| FHL11    | 6,02E-27 | 0,379083 | 0,977 | 0,874 | 1,15E-22 | 8 FHL1     |
| THBS22   | 7,64E-27 | 0,373347 | 0,972 | 0,926 | 1,46E-22 | 8 THBS2    |
| FBN21    | 1,40E-26 | 0,8759   | 0,866 | 0,761 | 2,68E-22 | 8 FBN2     |
| OST41    | 4,56E-26 | 0,288102 | 1     | 1     | 8,72E-22 | 8 OST4     |

|           |           |          |       |       |           |             |
|-----------|-----------|----------|-------|-------|-----------|-------------|
| ACTN4     | 8,75E-25  | 0,361307 | 0,986 | 0,949 | 1,67E-20  | 8 ACTN4     |
| FAM20C    | 1,39E-24  | 0,326689 | 0,949 | 0,885 | 2,66E-20  | 8 FAM20C    |
| MIR4458HG | 3,49E-24  | 0,25438  | 0,866 | 0,592 | 6,67E-20  | 8 MIR4458HG |
| TPM4      | 5,80E-24  | 0,280341 | 1     | 1     | 1,11E-19  | 8 TPM4      |
| FAT1      | 8,52E-23  | 0,30166  | 0,787 | 0,556 | 1,63E-18  | 8 FAT1      |
| FKBP9     | 1,41E-22  | 0,29215  | 0,949 | 0,814 | 2,70E-18  | 8 FKBP9     |
| WFDC1     | 2,84E-22  | 0,477006 | 0,968 | 0,889 | 5,43E-18  | 8 WFDC1     |
| LASP11    | 3,64E-22  | 0,329804 | 0,981 | 0,934 | 6,97E-18  | 8 LASP1     |
| CD81      | 4,33E-22  | 0,306443 | 0,981 | 0,967 | 8,28E-18  | 8 CD81      |
| RECK      | 5,87E-22  | 0,308467 | 0,921 | 0,841 | 1,12E-17  | 8 RECK      |
| SNTB2     | 2,15E-21  | 0,294331 | 0,963 | 0,872 | 4,11E-17  | 8 SNTB2     |
| KLF6      | 3,05E-21  | 0,298422 | 0,977 | 0,877 | 5,82E-17  | 8 KLF6      |
| PTRF      | 4,62E-21  | 0,260107 | 1     | 1     | 8,83E-17  | 8 PTRF      |
| APOL6     | 9,43E-21  | 0,272633 | 0,963 | 0,816 | 1,80E-16  | 8 APOL6     |
| COL5A11   | 1,65E-20  | 0,26247  | 0,944 | 0,838 | 3,16E-16  | 8 COL5A1    |
| NFIX1     | 4,10E-20  | 0,257206 | 0,963 | 0,853 | 7,84E-16  | 8 NFIX      |
| PLAC91    | 7,83E-20  | 0,28934  | 0,903 | 0,737 | 1,50E-15  | 8 PLAC9     |
| CBX6      | 1,44E-19  | 0,317599 | 0,981 | 0,903 | 2,75E-15  | 8 CBX6      |
| GNAQ      | 2,16E-19  | 0,250138 | 0,907 | 0,751 | 4,12E-15  | 8 GNAQ      |
| VAT11     | 4,02E-19  | 0,298927 | 0,991 | 0,986 | 7,69E-15  | 8 VAT1      |
| FAM63B    | 4,21E-19  | 0,268368 | 0,921 | 0,767 | 8,05E-15  | 8 FAM63B    |
| CRIM12    | 6,72E-19  | 0,310542 | 0,954 | 0,869 | 1,29E-14  | 8 CRIM1     |
| GLIPR2    | 8,22E-19  | 0,307343 | 0,94  | 0,866 | 1,57E-14  | 8 GLIPR2    |
| MEG31     | 1,26E-18  | 0,285866 | 0,981 | 0,972 | 2,41E-14  | 8 MEG3      |
| ZFP36L22  | 5,61E-18  | 0,316041 | 0,995 | 0,965 | 1,07E-13  | 8 ZFP36L2   |
| SLC38A22  | 9,00E-18  | 0,282129 | 0,986 | 0,972 | 1,72E-13  | 8 SLC38A2   |
| CLMP      | 1,18E-17  | 0,254119 | 0,995 | 0,978 | 2,25E-13  | 8 CLMP      |
| LMO7-AS1: | 1,70E-17  | 0,265396 | 0,903 | 0,788 | 3,24E-13  | 8 LMO7-AS1  |
| NABP11    | 4,09E-17  | 0,317217 | 0,991 | 0,972 | 7,83E-13  | 8 NABP1     |
| RHOB      | 4,91E-17  | 0,259963 | 0,819 | 0,628 | 9,40E-13  | 8 RHOB      |
| USP532    | 9,15E-17  | 0,295079 | 0,921 | 0,793 | 1,75E-12  | 8 USP53     |
| SVEP11    | 1,05E-16  | 0,269045 | 0,935 | 0,831 | 2,01E-12  | 8 SVEP1     |
| MLXIP2    | 1,10E-16  | 0,257775 | 0,991 | 0,935 | 2,10E-12  | 8 MLXIP     |
| AKAP123   | 1,11E-16  | 0,26396  | 1     | 0,977 | 2,12E-12  | 8 AKAP12    |
| CRYAB     | 1,34E-16  | 0,268354 | 0,829 | 0,601 | 2,56E-12  | 8 CRYAB     |
| HSPB61    | 2,28E-16  | 0,302078 | 0,917 | 0,841 | 4,37E-12  | 8 HSPB6     |
| CTTN1     | 2,33E-16  | 0,370535 | 0,991 | 0,975 | 4,45E-12  | 8 CTTN      |
| MYLK2     | 2,61E-16  | 0,399358 | 0,995 | 1     | 5,00E-12  | 8 MYLK      |
| GREM11    | 1,75E-14  | 0,326006 | 0,884 | 0,762 | 3,35E-10  | 8 GREM1     |
| B4GALT11  | 3,90E-14  | 0,285228 | 0,819 | 0,601 | 7,45E-10  | 8 B4GALT1   |
| PCDH7     | 5,22E-14  | 0,383991 | 0,657 | 0,474 | 9,99E-10  | 8 PCDH7     |
| ATP2B11   | 2,14E-13  | 0,267414 | 1     | 0,984 | 4,10E-09  | 8 ATP2B1    |
| LBH1      | 7,52E-13  | 0,300085 | 0,981 | 0,947 | 1,44E-08  | 8 LBH       |
| SBF2-AS12 | 2,01E-11  | 0,324081 | 0,972 | 0,946 | 3,84E-07  | 8 SBF2-AS1  |
| OSR21     | 3,20E-10  | 0,323258 | 0,861 | 0,737 | 6,12E-06  | 8 OSR2      |
| ADAMTS11  | 4,68E-10  | 0,255318 | 0,931 | 0,836 | 8,95E-06  | 8 ADAMTS1   |
| ADIRF1    | 7,86E-08  | 0,287879 | 0,949 | 0,921 | 0,001504  | 8 ADIRF     |
| LRRC75A2  | 0,000116  | 0,289413 | 0,731 | 0,606 | 1         | 8 LRRC75A   |
| CTNNB12   | 0,000364  | 0,270953 | 0,833 | 0,768 | 1         | 8 CTNNB1    |
| TROAP     | 1,49E-138 | 0,327434 | 0,596 | 0,058 | 2,85E-134 | 9 TROAP     |

|           |           |          |       |       |           |             |
|-----------|-----------|----------|-------|-------|-----------|-------------|
| TK1       | 7,54E-132 | 1,005025 | 0,967 | 0,264 | 1,44E-127 | 9 TK1       |
| BIRC5     | 1,38E-123 | 0,597668 | 0,727 | 0,11  | 2,65E-119 | 9 BIRC5     |
| KIAA01011 | 2,39E-97  | 1,220432 | 0,973 | 0,387 | 4,57E-93  | 9 KIAA0101  |
| RRM2      | 1,41E-95  | 0,277146 | 0,536 | 0,069 | 2,69E-91  | 9 RRM2      |
| HMGA12    | 4,99E-86  | 1,637804 | 1     | 0,967 | 9,55E-82  | 9 HMGA1     |
| TUBA1B1   | 8,24E-83  | 1,89006  | 1     | 0,995 | 1,58E-78  | 9 TUBA1B    |
| PPP1R14B1 | 4,92E-81  | 1,130311 | 1     | 0,963 | 9,40E-77  | 9 PPP1R14B  |
| LDHA2     | 4,24E-80  | 1,135739 | 1     | 0,993 | 8,10E-76  | 9 LDHA      |
| MT1E2     | 3,76E-76  | 1,58775  | 1     | 0,961 | 7,20E-72  | 9 MT1E      |
| PTTG1     | 6,82E-75  | 1,308637 | 0,891 | 0,39  | 1,30E-70  | 9 PTTG1     |
| TPI12     | 1,44E-74  | 0,915493 | 1     | 0,995 | 2,76E-70  | 9 TPI1      |
| CDKN3     | 3,61E-74  | 0,80548  | 0,847 | 0,312 | 6,91E-70  | 9 CDKN3     |
| HMG2      | 1,15E-73  | 1,13819  | 1     | 0,993 | 2,20E-69  | 9 HMG2      |
| DRAP1     | 7,17E-73  | 0,788801 | 1     | 0,997 | 1,37E-68  | 9 DRAP1     |
| MT2A1     | 1,21E-71  | 1,940431 | 1     | 0,999 | 2,32E-67  | 9 MT2A      |
| RPL22L12  | 1,38E-70  | 1,146365 | 1     | 0,972 | 2,63E-66  | 9 RPL22L1   |
| NME12     | 6,98E-70  | 0,914858 | 1     | 0,936 | 1,33E-65  | 9 NME1      |
| HNRNPA11  | 4,98E-69  | 0,746963 | 1     | 0,999 | 9,53E-65  | 9 HNRNPA1   |
| CENPM     | 6,18E-66  | 0,319512 | 0,612 | 0,145 | 1,18E-61  | 9 CENPM     |
| ENO12     | 2,49E-65  | 1,141313 | 1     | 0,998 | 4,75E-61  | 9 ENO1      |
| YBX1      | 3,61E-65  | 0,465286 | 1     | 1     | 6,90E-61  | 9 YBX1      |
| ATP5G11   | 6,97E-65  | 0,71624  | 0,995 | 0,969 | 1,33E-60  | 9 ATP5G1    |
| MYDGF2    | 1,60E-63  | 0,706112 | 1     | 0,997 | 3,06E-59  | 9 MYDGF     |
| H2AFV     | 2,04E-63  | 0,731799 | 0,995 | 0,931 | 3,90E-59  | 9 H2AFV     |
| NHP21     | 2,77E-63  | 0,663419 | 1     | 0,965 | 5,31E-59  | 9 NHP2      |
| HMGB1     | 4,00E-63  | 1,056837 | 1     | 0,997 | 7,65E-59  | 9 HMGB1     |
| PLP2      | 3,79E-60  | 0,738059 | 0,995 | 0,934 | 7,24E-56  | 9 PLP2      |
| DKK12     | 5,91E-60  | 1,367778 | 0,951 | 0,677 | 1,13E-55  | 9 DKK1      |
| PGAM11    | 9,00E-60  | 0,638387 | 1     | 0,994 | 1,72E-55  | 9 PGAM1     |
| RPA3      | 3,87E-59  | 0,539519 | 0,962 | 0,615 | 7,41E-55  | 9 RPA3      |
| NUDT1     | 1,01E-58  | 0,517995 | 0,951 | 0,619 | 1,93E-54  | 9 NUDT1     |
| PKM2      | 6,05E-58  | 0,906751 | 1     | 0,999 | 1,16E-53  | 9 PKM       |
| C1QBP     | 6,64E-58  | 0,756889 | 0,989 | 0,961 | 1,27E-53  | 9 C1QBP     |
| HNRNPA2B  | 1,61E-57  | 0,794091 | 1     | 0,993 | 3,09E-53  | 9 HNRNPA2B1 |
| HN1       | 2,41E-57  | 0,829079 | 1     | 0,954 | 4,62E-53  | 9 HN1       |
| CENPW     | 1,06E-56  | 0,690023 | 0,803 | 0,348 | 2,03E-52  | 9 CENPW     |
| CFL11     | 1,17E-56  | 0,588357 | 1     | 1     | 2,25E-52  | 9 CFL1      |
| RAN1      | 2,28E-56  | 0,766682 | 1     | 0,996 | 4,36E-52  | 9 RAN       |
| HNRNPC    | 3,29E-56  | 0,608588 | 1     | 0,984 | 6,28E-52  | 9 HNRNPC    |
| TYMS      | 3,67E-56  | 0,501772 | 0,792 | 0,298 | 7,01E-52  | 9 TYMS      |
| RANBP1    | 4,72E-56  | 0,730043 | 1     | 0,943 | 9,02E-52  | 9 RANBP1    |
| COX8A     | 5,74E-56  | 0,499593 | 1     | 0,997 | 1,10E-51  | 9 COX8A     |
| HSPD11    | 1,44E-55  | 0,741077 | 0,984 | 0,922 | 2,76E-51  | 9 HSPD1     |
| LMNA2     | 1,77E-55  | 0,746661 | 1     | 0,998 | 3,39E-51  | 9 LMNA      |
| SH3BGRL31 | 1,94E-55  | 0,704691 | 1     | 0,997 | 3,71E-51  | 9 SH3BGRL3  |
| SRM1      | 1,29E-54  | 0,685667 | 1     | 0,966 | 2,46E-50  | 9 SRM       |
| TNFRSF12A | 1,79E-54  | 0,807275 | 1     | 0,955 | 3,42E-50  | 9 TNFRSF12A |
| HERC4     | 2,89E-54  | 0,763595 | 0,978 | 0,8   | 5,52E-50  | 9 HERC4     |
| GGH       | 7,93E-54  | 0,426881 | 0,918 | 0,44  | 1,52E-49  | 9 GGH       |
| ANXA22    | 1,06E-53  | 0,835588 | 1     | 1     | 2,02E-49  | 9 ANXA2     |

|           |          |          |       |       |          |              |
|-----------|----------|----------|-------|-------|----------|--------------|
| CDC20     | 1,20E-52 | 0,32257  | 0,377 | 0,063 | 2,30E-48 | 9 CDC20      |
| IL7R      | 3,48E-52 | 0,283588 | 0,661 | 0,201 | 6,65E-48 | 9 IL7R       |
| PRELID11  | 1,54E-51 | 0,558391 | 1     | 0,997 | 2,95E-47 | 9 PRELID1    |
| PFN11     | 2,20E-51 | 0,49332  | 1     | 1     | 4,21E-47 | 9 PFN1       |
| H2AFZ     | 2,97E-50 | 1,063013 | 1     | 0,997 | 5,69E-46 | 9 H2AFZ      |
| EBNA1BP2  | 9,16E-50 | 0,707333 | 0,984 | 0,817 | 1,75E-45 | 9 EBNA1BP2   |
| SLC25A5   | 2,87E-49 | 0,606956 | 0,995 | 0,988 | 5,48E-45 | 9 SLC25A5    |
| AURKAIP1  | 5,71E-49 | 0,470972 | 1     | 0,993 | 1,09E-44 | 9 AURKAIP1   |
| SNRPB     | 1,49E-48 | 0,717239 | 1     | 0,98  | 2,84E-44 | 9 SNRPB      |
| SERBP1    | 2,99E-48 | 0,543431 | 1     | 0,991 | 5,71E-44 | 9 SERBP1     |
| ATP5G32   | 3,42E-48 | 0,525152 | 1     | 0,997 | 6,54E-44 | 9 ATP5G3     |
| LSM4      | 6,19E-48 | 0,556567 | 0,995 | 0,963 | 1,18E-43 | 9 LSM4       |
| HMG1      | 6,71E-48 | 0,481864 | 1     | 0,999 | 1,28E-43 | 9 HMG1       |
| NDUFS6    | 8,18E-48 | 0,481168 | 1     | 0,997 | 1,56E-43 | 9 NDUFS6     |
| CENPN     | 1,78E-47 | 0,351563 | 0,787 | 0,355 | 3,40E-43 | 9 CENPN      |
| CLIC12    | 2,69E-47 | 0,568845 | 1     | 0,999 | 5,14E-43 | 9 CLIC1      |
| UACA      | 1,56E-46 | 0,677763 | 0,984 | 0,865 | 2,98E-42 | 9 UACA       |
| NT5E      | 1,87E-46 | 0,564771 | 0,896 | 0,515 | 3,58E-42 | 9 NT5E       |
| EIF5A1    | 4,23E-46 | 0,571534 | 0,989 | 0,893 | 8,09E-42 | 9 EIF5A      |
| STMN1     | 1,12E-45 | 0,886927 | 0,984 | 0,794 | 2,14E-41 | 9 STMN1      |
| GTF3A     | 1,48E-45 | 0,500696 | 0,989 | 0,957 | 2,82E-41 | 9 GTF3A      |
| CHCHD2    | 2,82E-45 | 0,349682 | 1     | 0,999 | 5,40E-41 | 9 CHCHD2     |
| SNRPE     | 4,20E-45 | 0,476218 | 0,995 | 0,993 | 8,04E-41 | 9 SNRPE      |
| SRSF31    | 8,38E-45 | 0,671143 | 1     | 0,976 | 1,60E-40 | 9 SRSF3      |
| NPM11     | 1,95E-44 | 0,580171 | 1     | 1     | 3,74E-40 | 9 NPM1       |
| RPS26     | 3,18E-44 | 0,364192 | 1     | 1     | 6,07E-40 | 9 RPS26      |
| MRPL51    | 7,67E-44 | 0,442675 | 1     | 0,993 | 1,47E-39 | 9 MRPL51     |
| HNRNPH3   | 1,91E-43 | 0,550772 | 0,989 | 0,835 | 3,65E-39 | 9 HNRNPH3    |
| GAPDH1    | 2,31E-43 | 0,422518 | 1     | 1     | 4,42E-39 | 9 GAPDH      |
| HNRNPM1   | 4,18E-43 | 0,542357 | 0,973 | 0,874 | 8,00E-39 | 9 HNRNPM     |
| PDIA62    | 4,72E-43 | 0,604148 | 1     | 0,974 | 9,03E-39 | 9 PDIA6      |
| ARPC1A    | 5,10E-43 | 0,445149 | 1     | 0,993 | 9,76E-39 | 9 ARPC1A     |
| TMEM14B   | 8,10E-43 | 0,521787 | 0,995 | 0,972 | 1,55E-38 | 9 TMEM14B    |
| MRPL52    | 1,89E-42 | 0,459391 | 1     | 0,97  | 3,62E-38 | 9 MRPL52     |
| GTF3C6    | 1,35E-41 | 0,455662 | 0,995 | 0,94  | 2,59E-37 | 9 GTF3C6     |
| PRKCDBP1  | 1,76E-41 | 0,528839 | 0,995 | 0,995 | 3,36E-37 | 9 PRKCDBP    |
| STOML2    | 1,90E-41 | 0,482884 | 0,995 | 0,969 | 3,63E-37 | 9 STOML2     |
| GADD45GII | 2,66E-41 | 0,416467 | 1     | 0,993 | 5,10E-37 | 9 GADD45GIP1 |
| TUBA1C1   | 4,29E-41 | 0,70942  | 1     | 0,957 | 8,19E-37 | 9 TUBA1C     |
| SLIRP     | 4,64E-41 | 0,468582 | 1     | 0,987 | 8,88E-37 | 9 SLIRP      |
| AP2S1     | 5,47E-41 | 0,411154 | 1     | 1     | 1,05E-36 | 9 AP2S1      |
| PHB       | 7,79E-41 | 0,463081 | 1     | 0,965 | 1,49E-36 | 9 PHB        |
| ALYREF    | 7,84E-41 | 0,375524 | 0,852 | 0,49  | 1,50E-36 | 9 ALYREF     |
| LGALS1    | 1,66E-40 | 0,344636 | 1     | 1     | 3,18E-36 | 9 LGALS1     |
| EIF3I1    | 1,71E-40 | 0,488215 | 1     | 0,991 | 3,28E-36 | 9 EIF3I      |
| PDCD51    | 2,14E-40 | 0,481701 | 1     | 0,989 | 4,10E-36 | 9 PDCD5      |
| DTYMK     | 3,34E-40 | 0,540839 | 0,929 | 0,65  | 6,39E-36 | 9 DTYMK      |
| CYC11     | 7,02E-40 | 0,475633 | 1     | 0,96  | 1,34E-35 | 9 CYC1       |
| PSMC51    | 8,16E-40 | 0,461944 | 1     | 0,939 | 1,56E-35 | 9 PSMC5      |
| COX201    | 1,45E-39 | 0,51858  | 0,989 | 0,941 | 2,78E-35 | 9 COX20      |

|           |          |          |       |       |          |            |
|-----------|----------|----------|-------|-------|----------|------------|
| PA2G41    | 3,36E-39 | 0,534117 | 0,989 | 0,925 | 6,43E-35 | 9 PA2G4    |
| ODC11     | 7,74E-39 | 0,615161 | 0,951 | 0,76  | 1,48E-34 | 9 ODC1     |
| CAV11     | 8,19E-39 | 0,650914 | 1     | 0,999 | 1,57E-34 | 9 CAV1     |
| PLIN31    | 1,12E-38 | 0,465311 | 0,995 | 0,925 | 2,13E-34 | 9 PLIN3    |
| FABP5     | 1,48E-38 | 0,343228 | 0,787 | 0,4   | 2,82E-34 | 9 FABP5    |
| SMS       | 1,95E-38 | 0,551636 | 0,989 | 0,94  | 3,73E-34 | 9 SMS      |
| EMC4      | 2,20E-38 | 0,412227 | 1     | 0,93  | 4,21E-34 | 9 EMC4     |
| BCL7C     | 5,35E-38 | 0,46209  | 0,984 | 0,915 | 1,02E-33 | 9 BCL7C    |
| PRMT11    | 1,12E-37 | 0,552559 | 0,995 | 0,882 | 2,14E-33 | 9 PRMT1    |
| FKBP2     | 1,44E-37 | 0,424756 | 1     | 0,986 | 2,76E-33 | 9 FKBP2    |
| HSP90B11  | 1,88E-37 | 0,577773 | 1     | 0,965 | 3,60E-33 | 9 HSP90B1  |
| PSMB71    | 2,18E-37 | 0,433156 | 0,989 | 0,994 | 4,17E-33 | 9 PSMB7    |
| PSMB62    | 3,02E-37 | 0,506526 | 1     | 0,982 | 5,78E-33 | 9 PSMB6    |
| SRSF9     | 3,35E-37 | 0,430441 | 1     | 0,978 | 6,40E-33 | 9 SRSF9    |
| SRP9      | 3,71E-37 | 0,388192 | 1     | 0,976 | 7,09E-33 | 9 SRP9     |
| UBE2L31   | 4,10E-37 | 0,449271 | 1     | 0,988 | 7,83E-33 | 9 UBE2L3   |
| CALR2     | 1,72E-36 | 0,557479 | 1     | 0,998 | 3,29E-32 | 9 CALR     |
| PSMD21    | 1,94E-36 | 0,472021 | 0,978 | 0,888 | 3,71E-32 | 9 PSMD2    |
| MT1X      | 2,13E-36 | 0,61091  | 0,956 | 0,781 | 4,08E-32 | 9 MT1X     |
| EMP31     | 2,41E-36 | 0,501691 | 1     | 0,999 | 4,61E-32 | 9 EMP3     |
| CD441     | 4,57E-36 | 0,504052 | 1     | 0,999 | 8,74E-32 | 9 CD44     |
| SNU131    | 1,00E-35 | 0,427234 | 1     | 0,994 | 1,91E-31 | 9 SNU13    |
| PSMA72    | 2,18E-35 | 0,523951 | 1     | 0,999 | 4,17E-31 | 9 PSMA7    |
| ARPC1B1   | 2,96E-35 | 0,508909 | 1     | 0,995 | 5,66E-31 | 9 ARPC1B   |
| STRA13    | 3,62E-35 | 0,466037 | 0,978 | 0,82  | 6,92E-31 | 9 STRA13   |
| ARPC21    | 5,08E-35 | 0,467267 | 1     | 0,999 | 9,71E-31 | 9 ARPC2    |
| TXNDC17   | 1,75E-34 | 0,444336 | 0,995 | 0,967 | 3,35E-30 | 9 TXNDC17  |
| BOLA31    | 1,88E-34 | 0,4502   | 0,973 | 0,867 | 3,59E-30 | 9 BOLA3    |
| PSMB31    | 2,15E-34 | 0,492545 | 0,995 | 0,976 | 4,12E-30 | 9 PSMB3    |
| RPL81     | 2,25E-34 | 0,26696  | 1     | 1     | 4,30E-30 | 9 RPL8     |
| S100A112  | 3,99E-34 | 0,399558 | 1     | 1     | 7,63E-30 | 9 S100A11  |
| PSMB21    | 5,47E-34 | 0,412059 | 1     | 0,973 | 1,05E-29 | 9 PSMB2    |
| PARK71    | 7,24E-34 | 0,384534 | 1     | 0,999 | 1,38E-29 | 9 PARK7    |
| COTL11    | 8,30E-34 | 0,477737 | 1     | 0,978 | 1,59E-29 | 9 COTL1    |
| MRPL12    | 9,36E-34 | 0,44185  | 0,989 | 0,921 | 1,79E-29 | 9 MRPL12   |
| TOMM22    | 1,15E-33 | 0,40566  | 1     | 0,971 | 2,21E-29 | 9 TOMM22   |
| HSPE1     | 1,33E-33 | 0,494346 | 0,995 | 0,988 | 2,54E-29 | 9 HSPE1    |
| FST1      | 1,71E-33 | 0,853181 | 0,907 | 0,65  | 3,27E-29 | 9 FST      |
| ANXA13    | 1,91E-33 | 0,520535 | 1     | 0,992 | 3,66E-29 | 9 ANXA1    |
| MRPL36    | 2,61E-33 | 0,445768 | 0,995 | 0,948 | 4,99E-29 | 9 MRPL36   |
| FXYD5     | 3,71E-33 | 0,411467 | 0,995 | 0,982 | 7,09E-29 | 9 FXYD5    |
| SFRP11    | 1,11E-32 | 0,725193 | 0,88  | 0,653 | 2,12E-28 | 9 SFRP1    |
| BANF1     | 1,11E-32 | 0,410659 | 1     | 0,964 | 2,12E-28 | 9 BANF1    |
| HSP90AB11 | 1,58E-32 | 0,542532 | 1     | 0,999 | 3,01E-28 | 9 HSP90AB1 |
| ADRM11    | 2,16E-32 | 0,426953 | 1     | 0,962 | 4,13E-28 | 9 ADRM1    |
| ARF1      | 2,80E-32 | 0,44146  | 1     | 0,99  | 5,34E-28 | 9 ARF1     |
| CD59      | 2,96E-32 | 0,412081 | 1     | 0,997 | 5,65E-28 | 9 CD59     |
| PPIA      | 3,18E-32 | 0,307329 | 1     | 1     | 6,07E-28 | 9 PPIA     |
| PDAP1     | 3,99E-32 | 0,382744 | 0,995 | 0,97  | 7,62E-28 | 9 PDAP1    |
| TMED92    | 6,54E-32 | 0,4394   | 1     | 0,987 | 1,25E-27 | 9 TMED9    |

|           |          |          |       |       |          |             |
|-----------|----------|----------|-------|-------|----------|-------------|
| DIO2      | 8,26E-32 | 0,38833  | 0,552 | 0,202 | 1,58E-27 | 9 DIO2      |
| DDX39A    | 8,42E-32 | 0,340424 | 0,792 | 0,407 | 1,61E-27 | 9 DDX39A    |
| TMEM167A  | 8,86E-32 | 0,348645 | 0,995 | 0,959 | 1,69E-27 | 9 TMEM167A  |
| NDUFC21   | 1,00E-31 | 0,417057 | 1     | 0,984 | 1,91E-27 | 9 NDUFC2    |
| SSRP1     | 1,08E-31 | 0,381178 | 0,945 | 0,767 | 2,06E-27 | 9 SSRP1     |
| CTNNAL11  | 1,24E-31 | 0,471941 | 0,94  | 0,742 | 2,38E-27 | 9 CTNNAL1   |
| NOL71     | 1,81E-31 | 0,395066 | 0,989 | 0,902 | 3,47E-27 | 9 NOL7      |
| HNRNPDL   | 1,86E-31 | 0,502192 | 0,989 | 0,963 | 3,55E-27 | 9 HNRNPDL   |
| ATPIF11   | 5,22E-31 | 0,398315 | 1     | 0,99  | 9,99E-27 | 9 ATPIF1    |
| PTMS      | 5,75E-31 | 0,384198 | 1     | 0,998 | 1,10E-26 | 9 PTMS      |
| DTD1      | 6,82E-31 | 0,386794 | 0,956 | 0,795 | 1,30E-26 | 9 DTD1      |
| CCT51     | 6,96E-31 | 0,474638 | 0,989 | 0,872 | 1,33E-26 | 9 CCT5      |
| C12orf751 | 7,82E-31 | 0,662614 | 1     | 0,996 | 1,50E-26 | 9 C12orf75  |
| CALM3     | 8,43E-31 | 0,403654 | 0,989 | 0,971 | 1,61E-26 | 9 CALM3     |
| TPM3      | 8,76E-31 | 0,403059 | 1     | 0,981 | 1,68E-26 | 9 TPM3      |
| SNRPA     | 9,80E-31 | 0,404574 | 0,945 | 0,698 | 1,87E-26 | 9 SNRPA     |
| DHFR      | 1,12E-30 | 0,25656  | 0,727 | 0,372 | 2,14E-26 | 9 DHFR      |
| ATP5J2    | 1,36E-30 | 0,326523 | 1     | 0,996 | 2,61E-26 | 9 ATP5J2    |
| RUVBL2    | 1,40E-30 | 0,349089 | 0,929 | 0,658 | 2,67E-26 | 9 RUVBL2    |
| TUBB1     | 1,69E-30 | 0,525972 | 1     | 0,999 | 3,23E-26 | 9 TUBB      |
| HNRNPDL1  | 2,15E-30 | 0,423687 | 0,984 | 0,922 | 4,11E-26 | 9 HNRNPDL   |
| MRPL3     | 2,42E-30 | 0,381268 | 0,978 | 0,845 | 4,62E-26 | 9 MRPL3     |
| RGS20     | 2,63E-30 | 0,26554  | 0,699 | 0,351 | 5,03E-26 | 9 RGS20     |
| CUTA      | 2,81E-30 | 0,365443 | 1     | 0,999 | 5,38E-26 | 9 CUTA      |
| LINC00475 | 3,06E-30 | 0,498396 | 0,858 | 0,6   | 5,85E-26 | 9 LINC00475 |
| NDUFV21   | 3,26E-30 | 0,367687 | 0,995 | 0,988 | 6,23E-26 | 9 NDUFV2    |
| SPCS11    | 3,52E-30 | 0,368231 | 1     | 0,99  | 6,74E-26 | 9 SPCS1     |
| SERPINE1  | 4,68E-30 | 0,350884 | 0,699 | 0,339 | 8,94E-26 | 9 SERPINE1  |
| PAICS     | 5,79E-30 | 0,378086 | 0,869 | 0,627 | 1,11E-25 | 9 PAICS     |
| CCDC85B   | 7,74E-30 | 0,489658 | 0,989 | 0,995 | 1,48E-25 | 9 CCDC85B   |
| EIF4A11   | 9,42E-30 | 0,449415 | 1     | 0,973 | 1,80E-25 | 9 EIF4A1    |
| CYCS1     | 9,50E-30 | 0,484691 | 1     | 0,965 | 1,82E-25 | 9 CYCS      |
| TUBB4B1   | 1,11E-29 | 0,687268 | 1     | 0,914 | 2,13E-25 | 9 TUBB4B    |
| SNRPG     | 1,20E-29 | 0,445679 | 1     | 0,987 | 2,30E-25 | 9 SNRPG     |
| PFDN6     | 1,23E-29 | 0,332867 | 0,945 | 0,745 | 2,36E-25 | 9 PFDN6     |
| H3F3B     | 1,40E-29 | 0,392134 | 1     | 0,997 | 2,67E-25 | 9 H3F3B     |
| SNRPC     | 1,56E-29 | 0,415665 | 0,995 | 0,934 | 2,99E-25 | 9 SNRPC     |
| LSM3      | 1,59E-29 | 0,393225 | 1     | 0,979 | 3,05E-25 | 9 LSM3      |
| SNRPA1    | 1,98E-29 | 0,370773 | 0,852 | 0,578 | 3,78E-25 | 9 SNRPA1    |
| EIF61     | 2,48E-29 | 0,410789 | 0,995 | 0,963 | 4,74E-25 | 9 EIF6      |
| RAB34     | 2,52E-29 | 0,359974 | 0,995 | 0,983 | 4,83E-25 | 9 RAB34     |
| WBSCR221  | 2,55E-29 | 0,366562 | 0,967 | 0,81  | 4,87E-25 | 9 WBSCR22   |
| SLC16A32  | 2,55E-29 | 0,51008  | 0,989 | 0,907 | 4,88E-25 | 9 SLC16A3   |
| CLTB1     | 4,69E-29 | 0,381135 | 1     | 0,981 | 8,98E-25 | 9 CLTB      |
| MRPL141   | 5,28E-29 | 0,402953 | 1     | 0,975 | 1,01E-24 | 9 MRPL14    |
| CCT6A1    | 6,41E-29 | 0,394712 | 1     | 0,918 | 1,23E-24 | 9 CCT6A     |
| PSMD82    | 8,01E-29 | 0,43309  | 1     | 0,994 | 1,53E-24 | 9 PSMD8     |
| MZT2B     | 8,25E-29 | 0,324128 | 1     | 0,995 | 1,58E-24 | 9 MZT2B     |
| UBE2M     | 8,83E-29 | 0,371126 | 0,945 | 0,801 | 1,69E-24 | 9 UBE2M     |
| PSMB12    | 1,05E-28 | 0,462831 | 1     | 0,995 | 2,00E-24 | 9 PSMB1     |

|          |          |          |       |       |          |            |
|----------|----------|----------|-------|-------|----------|------------|
| C20orf27 | 1,30E-28 | 0,375698 | 0,967 | 0,789 | 2,48E-24 | 9 C20orf27 |
| MBOAT7   | 1,47E-28 | 0,374473 | 0,945 | 0,776 | 2,82E-24 | 9 MBOAT7   |
| DUT      | 2,40E-28 | 0,419611 | 0,984 | 0,923 | 4,58E-24 | 9 DUT      |
| MRPS7    | 5,92E-28 | 0,355039 | 0,978 | 0,868 | 1,13E-23 | 9 MRPS7    |
| NCL1     | 6,25E-28 | 0,596564 | 1     | 0,988 | 1,19E-23 | 9 NCL      |
| CCDC71L  | 6,48E-28 | 0,508594 | 0,967 | 0,924 | 1,24E-23 | 9 CCDC71L  |
| SDF2L1   | 9,55E-28 | 0,420303 | 0,956 | 0,833 | 1,83E-23 | 9 SDF2L1   |
| CNPY2    | 9,66E-28 | 0,330586 | 0,995 | 0,956 | 1,85E-23 | 9 CNPY2    |
| LRRC59   | 9,96E-28 | 0,404524 | 0,989 | 0,926 | 1,90E-23 | 9 LRRC59   |
| SNRPD1   | 1,14E-27 | 0,427264 | 0,989 | 0,968 | 2,18E-23 | 9 SNRPD1   |
| POLR2E   | 1,46E-27 | 0,354431 | 1     | 0,972 | 2,79E-23 | 9 POLR2E   |
| TIMM17A  | 1,50E-27 | 0,387575 | 0,984 | 0,912 | 2,87E-23 | 9 TIMM17A  |
| SET      | 1,59E-27 | 0,377515 | 0,995 | 0,996 | 3,05E-23 | 9 SET      |
| NDUFB3   | 1,76E-27 | 0,326925 | 0,984 | 0,976 | 3,37E-23 | 9 NDUFB3   |
| ERH      | 2,17E-27 | 0,382824 | 1     | 0,994 | 4,16E-23 | 9 ERH      |
| OGFRL1   | 3,10E-27 | 0,363404 | 0,896 | 0,655 | 5,93E-23 | 9 OGFRL1   |
| COX7A21  | 4,72E-27 | 0,271083 | 1     | 0,999 | 9,03E-23 | 9 COX7A2   |
| PSME21   | 5,47E-27 | 0,424616 | 0,995 | 0,95  | 1,05E-22 | 9 PSME2    |
| HNRNPA31 | 7,23E-27 | 0,410309 | 0,995 | 0,969 | 1,38E-22 | 9 HNRNPA3  |
| MRPL281  | 7,60E-27 | 0,349484 | 0,984 | 0,907 | 1,45E-22 | 9 MRPL28   |
| CALM11   | 7,84E-27 | 0,378733 | 1     | 0,991 | 1,50E-22 | 9 CALM1    |
| NDUFAB1  | 1,03E-26 | 0,362802 | 0,989 | 0,932 | 1,96E-22 | 9 NDUFAB1  |
| SRSF21   | 1,32E-26 | 0,426578 | 1     | 0,952 | 2,53E-22 | 9 SRSF2    |
| RPL7L1   | 1,58E-26 | 0,31532  | 0,984 | 0,877 | 3,03E-22 | 9 RPL7L1   |
| HMGB3    | 1,92E-26 | 0,293749 | 0,803 | 0,483 | 3,67E-22 | 9 HMGB3    |
| NDUFA121 | 2,17E-26 | 0,368009 | 0,989 | 0,924 | 4,15E-22 | 9 NDUFA12  |
| UBE2S    | 3,34E-26 | 0,754345 | 0,934 | 0,732 | 6,39E-22 | 9 UBE2S    |
| SRGN1    | 6,06E-26 | 0,550455 | 0,896 | 0,628 | 1,16E-21 | 9 SRGN     |
| CD320    | 7,52E-26 | 0,319613 | 0,885 | 0,656 | 1,44E-21 | 9 CD320    |
| SURF4    | 1,02E-25 | 0,353338 | 0,995 | 0,926 | 1,95E-21 | 9 SURF4    |
| SNF8     | 1,07E-25 | 0,324292 | 0,995 | 0,98  | 2,04E-21 | 9 SNF8     |
| HDGF     | 1,50E-25 | 0,338799 | 0,984 | 0,858 | 2,86E-21 | 9 HDGF     |
| MLF21    | 1,56E-25 | 0,37614  | 1     | 0,982 | 2,98E-21 | 9 MLF2     |
| COPS62   | 1,64E-25 | 0,386839 | 1     | 0,973 | 3,13E-21 | 9 COPS6    |
| ECHS1    | 2,36E-25 | 0,351484 | 0,989 | 0,937 | 4,51E-21 | 9 ECHS1    |
| RHOC     | 3,44E-25 | 0,317634 | 0,995 | 0,996 | 6,58E-21 | 9 RHOC     |
| POLD2    | 4,75E-25 | 0,325756 | 0,973 | 0,876 | 9,09E-21 | 9 POLD2    |
| PDIA41   | 5,70E-25 | 0,328335 | 0,967 | 0,786 | 1,09E-20 | 9 PDIA4    |
| ARHGAP18 | 1,01E-24 | 0,28544  | 0,825 | 0,521 | 1,94E-20 | 9 ARHGAP18 |
| SLIT2    | 1,58E-24 | 0,275062 | 0,705 | 0,383 | 3,02E-20 | 9 SLIT2    |
| MRPS12   | 1,77E-24 | 0,331945 | 1     | 0,935 | 3,38E-20 | 9 MRPS12   |
| EMG1     | 1,87E-24 | 0,314096 | 0,836 | 0,577 | 3,58E-20 | 9 EMG1     |
| ALDOA2   | 2,08E-24 | 0,332559 | 1     | 1     | 3,97E-20 | 9 ALDOA    |
| PHF19    | 2,16E-24 | 0,422053 | 0,77  | 0,518 | 4,13E-20 | 9 PHF19    |
| TXNL4A   | 2,80E-24 | 0,315157 | 0,984 | 0,948 | 5,36E-20 | 9 TXNL4A   |
| PSMC31   | 3,08E-24 | 0,39024  | 0,995 | 0,921 | 5,88E-20 | 9 PSMC3    |
| ATP5B1   | 3,41E-24 | 0,371351 | 1     | 0,994 | 6,52E-20 | 9 ATP5B    |
| TECR2    | 4,69E-24 | 0,334431 | 0,967 | 0,867 | 8,96E-20 | 9 TECR     |
| MRPL24   | 6,57E-24 | 0,303933 | 0,913 | 0,697 | 1,26E-19 | 9 MRPL24   |
| BAX      | 6,84E-24 | 0,33523  | 1     | 0,987 | 1,31E-19 | 9 BAX      |



|           |          |          |       |       |          |            |
|-----------|----------|----------|-------|-------|----------|------------|
| SF3B6     | 9,84E-24 | 0,334336 | 1     | 0,99  | 1,88E-19 | 9 SF3B6    |
| YWHAE1    | 1,01E-23 | 0,322072 | 1     | 0,995 | 1,93E-19 | 9 YWHAE    |
| RUVBL1    | 1,03E-23 | 0,290534 | 0,814 | 0,496 | 1,97E-19 | 9 RUVBL1   |
| AP1S1     | 1,32E-23 | 0,307645 | 0,989 | 0,953 | 2,53E-19 | 9 AP1S1    |
| HPRT1     | 1,33E-23 | 0,250621 | 0,852 | 0,558 | 2,55E-19 | 9 HPRT1    |
| EWSR1     | 1,52E-23 | 0,311132 | 0,967 | 0,829 | 2,91E-19 | 9 EWSR1    |
| UBE2I     | 1,67E-23 | 0,32488  | 1     | 0,982 | 3,20E-19 | 9 UBE2I    |
| NTMT1     | 1,81E-23 | 0,374997 | 0,989 | 0,93  | 3,47E-19 | 9 NTMT1    |
| GSPT11    | 1,92E-23 | 0,31834  | 0,967 | 0,858 | 3,67E-19 | 9 GSPT1    |
| SRSF7     | 1,94E-23 | 0,457316 | 0,973 | 0,847 | 3,71E-19 | 9 SRSF7    |
| UQCR101   | 2,27E-23 | 0,318449 | 0,995 | 0,995 | 4,34E-19 | 9 UQCR10   |
| C17orf891 | 2,74E-23 | 0,394135 | 1     | 0,986 | 5,24E-19 | 9 C17orf89 |
| MRPL57    | 3,23E-23 | 0,317598 | 0,995 | 0,976 | 6,18E-19 | 9 MRPL57   |
| COA4      | 3,54E-23 | 0,302891 | 0,989 | 0,895 | 6,77E-19 | 9 COA4     |
| NDUFAF3   | 5,34E-23 | 0,320478 | 0,995 | 0,98  | 1,02E-18 | 9 NDUFAF3  |
| VDAC11    | 6,87E-23 | 0,308099 | 1     | 0,987 | 1,31E-18 | 9 VDAC1    |
| GSTO11    | 7,16E-23 | 0,394364 | 1     | 0,994 | 1,37E-18 | 9 GSTO1    |
| CAPN21    | 9,34E-23 | 0,333883 | 0,995 | 0,984 | 1,79E-18 | 9 CAPN2    |
| NUTF2     | 9,95E-23 | 0,304561 | 0,989 | 0,977 | 1,90E-18 | 9 NUTF2    |
| MANF1     | 1,01E-22 | 0,410198 | 0,978 | 0,874 | 1,93E-18 | 9 MANF     |
| FKBP1A1   | 1,03E-22 | 0,294854 | 1     | 0,996 | 1,97E-18 | 9 FKBP1A   |
| MRPL20    | 1,16E-22 | 0,320829 | 0,989 | 0,974 | 2,21E-18 | 9 MRPL20   |
| SNRPF     | 1,49E-22 | 0,322687 | 1     | 0,981 | 2,85E-18 | 9 SNRPF    |
| AXL2      | 1,55E-22 | 0,621255 | 0,984 | 0,925 | 2,97E-18 | 9 AXL      |
| DAZAP1    | 1,65E-22 | 0,26885  | 0,913 | 0,711 | 3,15E-18 | 9 DAZAP1   |
| ANP32E    | 1,72E-22 | 0,302095 | 0,88  | 0,592 | 3,29E-18 | 9 ANP32E   |
| SEC61G1   | 1,79E-22 | 0,269443 | 1     | 0,998 | 3,43E-18 | 9 SEC61G   |
| PLAUR     | 1,82E-22 | 0,335273 | 0,902 | 0,687 | 3,49E-18 | 9 PLAUR    |
| CCT71     | 2,01E-22 | 0,323084 | 0,989 | 0,916 | 3,84E-18 | 9 CCT7     |
| SSBP11    | 2,52E-22 | 0,327152 | 0,995 | 0,984 | 4,83E-18 | 9 SSBP1    |
| PPP1CA    | 2,64E-22 | 0,335493 | 1     | 0,967 | 5,06E-18 | 9 PPP1CA   |
| GPATCH4   | 2,88E-22 | 0,322267 | 0,858 | 0,635 | 5,50E-18 | 9 GPATCH4  |
| HYI       | 2,95E-22 | 0,307179 | 0,896 | 0,65  | 5,63E-18 | 9 HYI      |
| SIGMAR1   | 2,95E-22 | 0,283122 | 0,929 | 0,696 | 5,64E-18 | 9 SIGMAR1  |
| TOMM40    | 3,06E-22 | 0,37519  | 0,869 | 0,678 | 5,86E-18 | 9 TOMM40   |
| RPS19BP1  | 3,25E-22 | 0,31801  | 1     | 0,973 | 6,21E-18 | 9 RPS19BP1 |
| S100A102  | 3,26E-22 | 0,36578  | 1     | 0,997 | 6,24E-18 | 9 S100A10  |
| NANS2     | 4,06E-22 | 0,350505 | 0,984 | 0,842 | 7,76E-18 | 9 NANS     |
| LARP6     | 4,29E-22 | 0,356006 | 1     | 0,986 | 8,20E-18 | 9 LARP6    |
| BASP11    | 4,76E-22 | 0,341095 | 1     | 0,989 | 9,11E-18 | 9 BASP1    |
| RER11     | 5,15E-22 | 0,303345 | 1     | 0,98  | 9,84E-18 | 9 RER1     |
| TRMT112   | 5,83E-22 | 0,299731 | 1     | 0,993 | 1,11E-17 | 9 TRMT112  |
| MRPS18C   | 6,25E-22 | 0,32396  | 0,995 | 0,878 | 1,19E-17 | 9 MRPS18C  |
| MRPL43    | 7,64E-22 | 0,276082 | 1     | 0,931 | 1,46E-17 | 9 MRPL43   |
| GLRX2     | 8,04E-22 | 0,576725 | 1     | 0,993 | 1,54E-17 | 9 GLRX     |
| TAGLN2    | 1,21E-21 | 0,341928 | 0,995 | 0,988 | 2,31E-17 | 9 TAGLN2   |
| HSPA52    | 1,22E-21 | 0,507534 | 1     | 0,975 | 2,32E-17 | 9 HSPA5    |
| LSM7      | 1,30E-21 | 0,321069 | 1     | 0,984 | 2,49E-17 | 9 LSM7     |
| IMPDH2    | 1,63E-21 | 0,379424 | 0,984 | 0,925 | 3,12E-17 | 9 IMPDH2   |
| MRPL4     | 1,70E-21 | 0,294946 | 0,984 | 0,876 | 3,25E-17 | 9 MRPL4    |

|          |          |          |       |       |          |   |          |
|----------|----------|----------|-------|-------|----------|---|----------|
| PTMA2    | 1,85E-21 | 0,386783 | 1     | 1     | 3,54E-17 | 9 | PTMA     |
| FUS      | 1,96E-21 | 0,354883 | 0,989 | 0,928 | 3,74E-17 | 9 | FUS      |
| UFD1L1   | 2,03E-21 | 0,284694 | 0,978 | 0,85  | 3,89E-17 | 9 | UFD1L    |
| NMT2     | 2,59E-21 | 0,288438 | 0,945 | 0,748 | 4,95E-17 | 9 | NMT2     |
| PTGES3   | 3,41E-21 | 0,344248 | 1     | 0,984 | 6,52E-17 | 9 | PTGES3   |
| GNAI2    | 4,83E-21 | 0,292435 | 0,989 | 0,968 | 9,24E-17 | 9 | GNAI2    |
| YWHAQ1   | 5,03E-21 | 0,308537 | 1     | 0,992 | 9,61E-17 | 9 | YWHAQ    |
| SSR3     | 5,17E-21 | 0,328344 | 1     | 0,992 | 9,88E-17 | 9 | SSR3     |
| LACTB1   | 8,00E-21 | 0,338554 | 0,945 | 0,831 | 1,53E-16 | 9 | LACTB    |
| PSMD131  | 8,46E-21 | 0,291419 | 0,951 | 0,784 | 1,62E-16 | 9 | PSMD13   |
| CCT21    | 8,92E-21 | 0,349675 | 0,973 | 0,9   | 1,71E-16 | 9 | CCT2     |
| PRSS3    | 9,12E-21 | 0,267398 | 0,552 | 0,269 | 1,74E-16 | 9 | PRSS3    |
| NPM3     | 9,96E-21 | 0,306668 | 0,984 | 0,885 | 1,90E-16 | 9 | NPM3     |
| HNRNPK1  | 1,17E-20 | 0,330829 | 1     | 0,995 | 2,24E-16 | 9 | HNRNPK   |
| XRCC61   | 1,38E-20 | 0,346947 | 0,995 | 0,93  | 2,64E-16 | 9 | XRCC6    |
| MINOS1   | 1,42E-20 | 0,279919 | 1     | 0,99  | 2,71E-16 | 9 | MINOS1   |
| KRT183   | 1,48E-20 | 0,924873 | 0,896 | 0,772 | 2,83E-16 | 9 | KRT18    |
| RBX1     | 1,64E-20 | 0,268054 | 1     | 0,991 | 3,13E-16 | 9 | RBX1     |
| THRAP31  | 2,01E-20 | 0,311947 | 0,995 | 0,911 | 3,84E-16 | 9 | THRAP3   |
| ILF21    | 2,19E-20 | 0,389789 | 0,989 | 0,854 | 4,18E-16 | 9 | ILF2     |
| NT5DC2   | 2,46E-20 | 0,271959 | 0,852 | 0,624 | 4,70E-16 | 9 | NT5DC2   |
| HNRNPR   | 2,58E-20 | 0,35244  | 0,989 | 0,895 | 4,94E-16 | 9 | HNRNPR   |
| FBL      | 2,69E-20 | 0,28047  | 0,978 | 0,927 | 5,14E-16 | 9 | FBL      |
| NDUFB9   | 3,01E-20 | 0,271611 | 1     | 0,99  | 5,76E-16 | 9 | NDUFB9   |
| SFPQ     | 3,19E-20 | 0,313194 | 1     | 0,939 | 6,10E-16 | 9 | SFPQ     |
| PDCD6    | 3,20E-20 | 0,285062 | 0,989 | 0,963 | 6,12E-16 | 9 | PDCD6    |
| CCDC124  | 3,23E-20 | 0,305928 | 0,978 | 0,898 | 6,18E-16 | 9 | CCDC124  |
| XRCC51   | 3,51E-20 | 0,352087 | 0,989 | 0,935 | 6,72E-16 | 9 | XRCC5    |
| SLC35B1  | 3,89E-20 | 0,273267 | 0,94  | 0,784 | 7,43E-16 | 9 | SLC35B1  |
| CACYBP1  | 4,00E-20 | 0,323105 | 0,962 | 0,805 | 7,66E-16 | 9 | CACYBP   |
| SKA2     | 4,20E-20 | 0,294724 | 0,984 | 0,836 | 8,03E-16 | 9 | SKA2     |
| ARHGDI1A | 4,36E-20 | 0,303907 | 0,995 | 0,975 | 8,34E-16 | 9 | ARHGDI1A |
| MRPL17   | 4,98E-20 | 0,333215 | 0,973 | 0,871 | 9,53E-16 | 9 | MRPL17   |
| UBB1     | 5,51E-20 | 0,403706 | 1     | 0,999 | 1,05E-15 | 9 | UBB      |
| NUDC1    | 5,81E-20 | 0,332172 | 0,978 | 0,921 | 1,11E-15 | 9 | NUDC     |
| STRAP    | 5,86E-20 | 0,311705 | 1     | 0,98  | 1,12E-15 | 9 | STRAP    |
| EIF1AX   | 6,99E-20 | 0,316125 | 1     | 0,966 | 1,34E-15 | 9 | EIF1AX   |
| GNL3     | 7,03E-20 | 0,307871 | 0,902 | 0,68  | 1,34E-15 | 9 | GNL3     |
| PSMB51   | 8,16E-20 | 0,274725 | 0,995 | 0,994 | 1,56E-15 | 9 | PSMB5    |
| NDUFC1   | 8,37E-20 | 0,295331 | 1     | 0,964 | 1,60E-15 | 9 | NDUFC1   |
| CISD3    | 1,04E-19 | 0,278949 | 0,978 | 0,841 | 1,99E-15 | 9 | CISD3    |
| MRPS34   | 1,40E-19 | 0,298783 | 0,995 | 0,952 | 2,67E-15 | 9 | MRPS34   |
| MRPL23   | 1,50E-19 | 0,272256 | 0,989 | 0,961 | 2,88E-15 | 9 | MRPL23   |
| CRELD2   | 1,60E-19 | 0,263956 | 0,945 | 0,791 | 3,07E-15 | 9 | CRELD2   |
| LSM5     | 1,67E-19 | 0,393738 | 1     | 0,94  | 3,20E-15 | 9 | LSM5     |
| MLEC     | 1,71E-19 | 0,272856 | 0,989 | 0,927 | 3,27E-15 | 9 | MLEC     |
| PHLDA21  | 1,73E-19 | 0,487965 | 0,995 | 0,965 | 3,30E-15 | 9 | PHLDA2   |
| SUMO3    | 1,82E-19 | 0,262691 | 0,989 | 0,952 | 3,48E-15 | 9 | SUMO3    |
| ENY2     | 1,92E-19 | 0,292051 | 1     | 0,984 | 3,66E-15 | 9 | ENY2     |
| MAP2K3   | 2,26E-19 | 0,27587  | 0,852 | 0,631 | 4,31E-15 | 9 | MAP2K3   |

|          |          |          |       |       |          |            |
|----------|----------|----------|-------|-------|----------|------------|
| ADIRF2   | 2,50E-19 | 0,674714 | 0,978 | 0,919 | 4,79E-15 | 9 ADIRF    |
| ASPH2    | 2,72E-19 | 0,30523  | 0,995 | 0,986 | 5,20E-15 | 9 ASPH     |
| POMP2    | 3,46E-19 | 0,283623 | 1     | 1     | 6,61E-15 | 9 POMP     |
| TMEM158  | 3,55E-19 | 0,501808 | 0,792 | 0,58  | 6,78E-15 | 9 TMEM158  |
| CLEC11A  | 4,33E-19 | 0,28705  | 0,956 | 0,794 | 8,28E-15 | 9 CLEC11A  |
| RPL26L1  | 4,74E-19 | 0,264124 | 0,984 | 0,941 | 9,06E-15 | 9 RPL26L1  |
| ANAPC15  | 5,22E-19 | 0,283864 | 0,984 | 0,887 | 9,97E-15 | 9 ANAPC15  |
| ITGA2    | 5,33E-19 | 0,388035 | 0,705 | 0,468 | 1,02E-14 | 9 ITGA2    |
| BRMS1    | 5,44E-19 | 0,277716 | 0,94  | 0,768 | 1,04E-14 | 9 BRMS1    |
| TSR3     | 5,49E-19 | 0,266909 | 0,951 | 0,874 | 1,05E-14 | 9 TSR3     |
| SEC131   | 5,84E-19 | 0,297465 | 0,984 | 0,923 | 1,12E-14 | 9 SEC13    |
| VPS25    | 6,03E-19 | 0,2552   | 0,967 | 0,824 | 1,15E-14 | 9 VPS25    |
| CKAP41   | 6,56E-19 | 0,287642 | 1     | 0,986 | 1,25E-14 | 9 CKAP4    |
| UBE2N    | 6,77E-19 | 0,302494 | 0,978 | 0,923 | 1,29E-14 | 9 UBE2N    |
| TMEM106C | 8,19E-19 | 0,299528 | 0,962 | 0,791 | 1,57E-14 | 9 TMEM106C |
| DDX46    | 8,61E-19 | 0,274487 | 0,984 | 0,944 | 1,65E-14 | 9 DDX46    |
| NDUFB6   | 8,71E-19 | 0,28364  | 0,973 | 0,926 | 1,67E-14 | 9 NDUFB6   |
| EEF1E1   | 9,28E-19 | 0,264328 | 0,842 | 0,627 | 1,78E-14 | 9 EEF1E1   |
| RAC11    | 9,50E-19 | 0,288597 | 1     | 0,999 | 1,82E-14 | 9 RAC1     |
| NDUFA81  | 1,18E-18 | 0,273427 | 0,995 | 0,931 | 2,26E-14 | 9 NDUFA8   |
| COMMD4   | 1,39E-18 | 0,278764 | 0,973 | 0,912 | 2,66E-14 | 9 COMMD4   |
| SRA1     | 1,47E-18 | 0,277527 | 0,978 | 0,946 | 2,82E-14 | 9 SRA1     |
| CCT41    | 1,64E-18 | 0,273113 | 0,989 | 0,944 | 3,13E-14 | 9 CCT4     |
| MEST1    | 1,97E-18 | 0,512153 | 0,94  | 0,825 | 3,76E-14 | 9 MEST     |
| ISOC2    | 2,14E-18 | 0,274104 | 0,989 | 0,92  | 4,09E-14 | 9 ISOC2    |
| EID11    | 2,70E-18 | 0,273527 | 1     | 0,999 | 5,15E-14 | 9 EID1     |
| ZDHHC12  | 2,72E-18 | 0,275241 | 0,973 | 0,938 | 5,20E-14 | 9 ZDHHC12  |
| ILF3     | 3,01E-18 | 0,265293 | 0,923 | 0,797 | 5,75E-14 | 9 ILF3     |
| MT-ATP6  | 3,91E-18 | 0,258808 | 1     | 1     | 7,47E-14 | 9 MT-ATP6  |
| NDUFB10  | 4,30E-18 | 0,26529  | 0,995 | 0,994 | 8,23E-14 | 9 NDUFB10  |
| MRPS16   | 4,49E-18 | 0,264009 | 0,995 | 0,955 | 8,59E-14 | 9 MRPS16   |
| HGF      | 4,78E-18 | 0,451216 | 0,907 | 0,8   | 9,15E-14 | 9 HGF      |
| YWHAB1   | 6,65E-18 | 0,26546  | 1     | 0,994 | 1,27E-13 | 9 YWHAB    |
| STUB1    | 7,39E-18 | 0,269761 | 0,989 | 0,984 | 1,41E-13 | 9 STUB1    |
| TM4SF1   | 8,11E-18 | 0,397855 | 0,678 | 0,398 | 1,55E-13 | 9 TM4SF1   |
| AP2M12   | 1,20E-17 | 0,266334 | 1     | 0,998 | 2,30E-13 | 9 AP2M1    |
| NDUFS8   | 1,29E-17 | 0,287431 | 1     | 0,987 | 2,46E-13 | 9 NDUFS8   |
| UBE2J2   | 1,29E-17 | 0,254996 | 0,951 | 0,827 | 2,47E-13 | 9 UBE2J2   |
| PSMA31   | 1,99E-17 | 0,319683 | 0,995 | 0,961 | 3,81E-13 | 9 PSMA3    |
| EBPL1    | 2,12E-17 | 0,276755 | 0,973 | 0,932 | 4,05E-13 | 9 EBPL     |
| MRPL131  | 2,61E-17 | 0,265524 | 0,978 | 0,878 | 4,98E-13 | 9 MRPL13   |
| MPG      | 2,81E-17 | 0,279946 | 1     | 0,992 | 5,37E-13 | 9 MPG      |
| SNRNP701 | 3,40E-17 | 0,265367 | 0,962 | 0,878 | 6,49E-13 | 9 SNRNP70  |
| MRPL21   | 4,68E-17 | 0,268489 | 0,978 | 0,891 | 8,96E-13 | 9 MRPL21   |
| PSMC41   | 4,98E-17 | 0,270706 | 0,918 | 0,764 | 9,52E-13 | 9 PSMC4    |
| C16orf13 | 5,08E-17 | 0,250364 | 0,989 | 0,954 | 9,71E-13 | 9 C16orf13 |
| DBI      | 5,26E-17 | 0,284567 | 1     | 0,999 | 1,01E-12 | 9 DBI      |
| CISD1    | 5,30E-17 | 0,280354 | 0,978 | 0,971 | 1,01E-12 | 9 CISD1    |
| TCP11    | 5,73E-17 | 0,264484 | 1     | 0,932 | 1,10E-12 | 9 TCP1     |
| PGK11    | 6,64E-17 | 0,299061 | 0,995 | 0,974 | 1,27E-12 | 9 PGK1     |

|          |          |          |       |       |          |           |
|----------|----------|----------|-------|-------|----------|-----------|
| KDELR21  | 6,79E-17 | 0,26336  | 1     | 0,995 | 1,30E-12 | 9 KDELR2  |
| NFIC     | 8,61E-17 | 0,264837 | 1     | 0,974 | 1,65E-12 | 9 NFIC    |
| CTDNEP1  | 8,87E-17 | 0,254442 | 0,978 | 0,887 | 1,70E-12 | 9 CTDNEP1 |
| PIN1     | 8,88E-17 | 0,259042 | 0,995 | 0,963 | 1,70E-12 | 9 PIN1    |
| PPP4C    | 1,01E-16 | 0,276574 | 0,989 | 0,967 | 1,93E-12 | 9 PPP4C   |
| NOP16    | 1,08E-16 | 0,293914 | 0,71  | 0,471 | 2,06E-12 | 9 NOP16   |
| PRDX61   | 1,37E-16 | 0,347098 | 1     | 0,997 | 2,61E-12 | 9 PRDX6   |
| MAP1A1   | 1,50E-16 | 0,31678  | 0,978 | 0,951 | 2,87E-12 | 9 MAP1A   |
| CBR11    | 1,60E-16 | 0,283563 | 0,995 | 0,907 | 3,06E-12 | 9 CBR1    |
| TIMM10   | 2,10E-16 | 0,265596 | 0,945 | 0,831 | 4,01E-12 | 9 TIMM10  |
| NELFE    | 2,49E-16 | 0,252928 | 0,967 | 0,855 | 4,76E-12 | 9 NELFE   |
| CDC371   | 2,53E-16 | 0,269015 | 1     | 0,966 | 4,84E-12 | 9 CDC37   |
| GNB2     | 2,59E-16 | 0,265999 | 1     | 0,984 | 4,95E-12 | 9 GNB2    |
| HNRNPU1  | 3,22E-16 | 0,271832 | 1     | 0,959 | 6,15E-12 | 9 HNRNPU  |
| GAS62    | 3,25E-16 | 0,379316 | 1     | 0,988 | 6,22E-12 | 9 GAS6    |
| PRR13    | 3,90E-16 | 0,266394 | 1     | 0,978 | 7,46E-12 | 9 PRR13   |
| MRPL40   | 4,54E-16 | 0,255895 | 0,973 | 0,894 | 8,68E-12 | 9 MRPL40  |
| SYNCRIP1 | 4,61E-16 | 0,282883 | 0,989 | 0,896 | 8,82E-12 | 9 SYNCRIP |
| ATG101   | 4,85E-16 | 0,25907  | 0,956 | 0,859 | 9,28E-12 | 9 ATG101  |
| VIM3     | 5,39E-16 | 0,37043  | 1     | 1     | 1,03E-11 | 9 VIM     |
| BDKRB1   | 5,45E-16 | 0,261093 | 0,885 | 0,656 | 1,04E-11 | 9 BDKRB1  |
| VCP1     | 6,22E-16 | 0,259221 | 0,989 | 0,935 | 1,19E-11 | 9 VCP     |
| VDAC31   | 6,48E-16 | 0,262829 | 0,989 | 0,915 | 1,24E-11 | 9 VDAC3   |
| MCTS1    | 8,91E-16 | 0,26095  | 0,995 | 0,906 | 1,70E-11 | 9 MCTS1   |
| PSMD41   | 9,05E-16 | 0,285403 | 0,995 | 0,954 | 1,73E-11 | 9 PSMD4   |
| BNIP3    | 9,34E-16 | 0,262397 | 0,984 | 0,97  | 1,79E-11 | 9 BNIP3   |
| MTCH21   | 9,73E-16 | 0,260809 | 0,989 | 0,945 | 1,86E-11 | 9 MTCH2   |
| UGDH     | 9,80E-16 | 0,251917 | 0,945 | 0,753 | 1,87E-11 | 9 UGDH    |
| PSMC11   | 1,26E-15 | 0,255901 | 0,978 | 0,891 | 2,41E-11 | 9 PSMC1   |
| PRDX12   | 1,27E-15 | 0,352846 | 1     | 1     | 2,43E-11 | 9 PRDX1   |
| TAF10    | 1,54E-15 | 0,267017 | 0,962 | 0,885 | 2,95E-11 | 9 TAF10   |
| RSL1D1   | 1,84E-15 | 0,266147 | 1     | 0,957 | 3,51E-11 | 9 RSL1D1  |
| MDH22    | 1,89E-15 | 0,274096 | 1     | 0,985 | 3,62E-11 | 9 MDH2    |
| UQCC2    | 2,59E-15 | 0,273789 | 0,995 | 0,947 | 4,96E-11 | 9 UQCC2   |
| SNRPB21  | 3,40E-15 | 0,266789 | 1     | 0,957 | 6,51E-11 | 9 SNRPB2  |
| PFDN2    | 4,57E-15 | 0,336702 | 0,995 | 0,942 | 8,75E-11 | 9 PFDN2   |
| MRPL22   | 5,72E-15 | 0,253964 | 0,978 | 0,871 | 1,09E-10 | 9 MRPL22  |
| KRT101   | 6,04E-15 | 0,250818 | 0,995 | 0,987 | 1,15E-10 | 9 KRT10   |
| CCT31    | 6,20E-15 | 0,269817 | 0,984 | 0,973 | 1,19E-10 | 9 CCT3    |
| PRSS231  | 7,72E-15 | 0,261587 | 0,956 | 0,87  | 1,48E-10 | 9 PRSS23  |
| PSMA51   | 8,03E-15 | 0,276503 | 0,995 | 0,967 | 1,53E-10 | 9 PSMA5   |
| TUFM1    | 8,18E-15 | 0,262799 | 1     | 0,977 | 1,56E-10 | 9 TUFM    |
| DEK      | 1,18E-14 | 0,304664 | 0,995 | 0,948 | 2,25E-10 | 9 DEK     |
| DCBLD2   | 1,51E-14 | 0,383685 | 0,858 | 0,698 | 2,89E-10 | 9 DCBLD2  |
| DCUN1D5  | 1,59E-14 | 0,250521 | 0,945 | 0,811 | 3,03E-10 | 9 DCUN1D5 |
| UBE2E3   | 2,15E-14 | 0,25291  | 0,995 | 0,942 | 4,11E-10 | 9 UBE2E3  |
| PLAT1    | 2,99E-14 | 0,613736 | 0,885 | 0,833 | 5,71E-10 | 9 PLAT    |
| SKP12    | 3,15E-14 | 0,252164 | 1     | 0,999 | 6,02E-10 | 9 SKP1    |
| TAF9     | 3,33E-14 | 0,252687 | 0,995 | 0,936 | 6,36E-10 | 9 TAF9    |
| ATP5C12  | 5,18E-14 | 0,255437 | 1     | 0,983 | 9,90E-10 | 9 ATP5C1  |

|           |           |          |       |       |           |             |
|-----------|-----------|----------|-------|-------|-----------|-------------|
| POLR2F    | 6,45E-14  | 0,257167 | 0,995 | 0,971 | 1,23E-09  | 9 POLR2F    |
| CD471     | 7,10E-14  | 0,278959 | 0,984 | 0,928 | 1,36E-09  | 9 CD47      |
| TOP11     | 7,19E-14  | 0,252195 | 0,934 | 0,816 | 1,38E-09  | 9 TOP1      |
| TNFRSF11B | 7,82E-14  | 0,387338 | 0,962 | 0,899 | 1,49E-09  | 9 TNFRSF11B |
| ADI1      | 7,98E-14  | 0,251316 | 0,984 | 0,927 | 1,53E-09  | 9 ADI1      |
| MESDC21   | 1,82E-13  | 0,255025 | 0,94  | 0,833 | 3,48E-09  | 9 MESDC2    |
| PRDX22    | 2,41E-13  | 0,26597  | 0,995 | 0,985 | 4,61E-09  | 9 PRDX2     |
| RPL39L    | 2,79E-13  | 0,257908 | 0,716 | 0,521 | 5,34E-09  | 9 RPL39L    |
| S100A16   | 3,59E-13  | 0,432977 | 0,956 | 0,916 | 6,87E-09  | 9 S100A16   |
| RBMX      | 4,26E-13  | 0,250167 | 0,984 | 0,915 | 8,14E-09  | 9 RBMX      |
| PLAU1     | 6,49E-13  | 0,520719 | 0,88  | 0,75  | 1,24E-08  | 9 PLAU      |
| PPIB2     | 1,40E-12  | 0,291429 | 1     | 1     | 2,68E-08  | 9 PPIB      |
| BZW11     | 2,54E-12  | 0,264509 | 0,995 | 0,963 | 4,86E-08  | 9 BZW1      |
| METR1     | 4,32E-12  | 0,262243 | 0,978 | 0,89  | 8,25E-08  | 9 METR1     |
| NOP561    | 9,85E-11  | 0,250981 | 0,836 | 0,699 | 1,88E-06  | 9 NOP56     |
| CITED22   | 1,60E-10  | 0,324326 | 0,989 | 0,938 | 3,07E-06  | 9 CITED2    |
| TUBB62    | 1,75E-10  | 0,268607 | 0,995 | 0,971 | 3,35E-06  | 9 TUBB6     |
| BRIX12    | 2,25E-10  | 0,261878 | 0,929 | 0,81  | 4,30E-06  | 9 BRIX1     |
| CKS1B     | 2,61E-10  | 0,419802 | 0,694 | 0,524 | 4,99E-06  | 9 CKS1B     |
| ID1       | 3,27E-10  | 0,377615 | 0,858 | 0,753 | 6,25E-06  | 9 ID1       |
| ATP2B12   | 4,57E-10  | 0,26145  | 1     | 0,985 | 8,74E-06  | 9 ATP2B1    |
| FGF5      | 2,06E-09  | 0,263316 | 0,464 | 0,297 | 3,94E-05  | 9 FGF5      |
| PTGR12    | 2,61E-09  | 0,302151 | 0,995 | 0,972 | 5,00E-05  | 9 PTGR1     |
| CCND13    | 3,68E-09  | 0,458337 | 0,973 | 0,967 | 7,04E-05  | 9 CCND1     |
| NLRP1     | 4,40E-09  | 0,296661 | 0,902 | 0,812 | 8,42E-05  | 9 NLRP1     |
| NQO12     | 2,13E-08  | 0,40996  | 1     | 0,99  | 0,000407  | 9 NQO1      |
| LXN3      | 1,66E-07  | 0,285615 | 0,984 | 0,936 | 0,003176  | 9 LXN       |
| CEBPD1    | 4,44E-07  | 0,286146 | 0,989 | 0,982 | 0,008496  | 9 CEBPD     |
| ADM1      | 6,00E-07  | 0,265009 | 0,962 | 0,948 | 0,011477  | 9 ADM       |
| DDX21     | 6,88E-06  | 0,265998 | 0,913 | 0,807 | 0,131507  | 9 DDX21     |
| PITX11    | 9,16E-06  | 0,315843 | 0,989 | 0,986 | 0,175149  | 9 PITX1     |
| PHLDA1    | 9,21E-06  | 0,327148 | 0,858 | 0,803 | 0,176071  | 9 PHLDA1    |
| SPC25     | 0         | 0,622526 | 0,8   | 0,009 | 0         | 10 SPC25    |
| ESCO2     | 0         | 0,378113 | 0,727 | 0,003 | 0         | 10 ESCO2    |
| KIF2C     | 1,91E-290 | 0,515218 | 0,727 | 0,009 | 3,66E-286 | 10 KIF2C    |
| NUF2      | 6,61E-281 | 0,480799 | 0,709 | 0,009 | 1,26E-276 | 10 NUF2     |
| BUB1B     | 5,31E-257 | 0,3391   | 0,636 | 0,007 | 1,02E-252 | 10 BUB1B    |
| DEPDC1    | 1,13E-256 | 0,775842 | 0,873 | 0,02  | 2,16E-252 | 10 DEPDC1   |
| ASF1B     | 2,86E-255 | 0,371667 | 0,709 | 0,011 | 5,47E-251 | 10 ASF1B    |
| CDCA8     | 8,26E-252 | 0,601514 | 0,818 | 0,017 | 1,58E-247 | 10 CDCA8    |
| CKAP2L    | 1,51E-249 | 0,339991 | 0,691 | 0,01  | 2,89E-245 | 10 CKAP2L   |
| CASC5     | 3,21E-245 | 0,499087 | 0,818 | 0,018 | 6,14E-241 | 10 CASC5    |
| CEP55     | 5,01E-241 | 1,013809 | 0,964 | 0,03  | 9,58E-237 | 10 CEP55    |
| DTL       | 8,71E-238 | 0,309089 | 0,618 | 0,008 | 1,67E-233 | 10 DTL      |
| NCAPH     | 1,26E-235 | 0,293778 | 0,636 | 0,009 | 2,41E-231 | 10 NCAPH    |
| KIFC1     | 4,16E-235 | 0,466687 | 0,727 | 0,014 | 7,96E-231 | 10 KIFC1    |
| SGOL1     | 1,52E-232 | 0,476461 | 0,745 | 0,015 | 2,90E-228 | 10 SGOL1    |
| PKMYT1    | 1,53E-228 | 0,449035 | 0,745 | 0,016 | 2,92E-224 | 10 PKMYT1   |
| CDC25C    | 1,48E-223 | 0,290969 | 0,6   | 0,008 | 2,83E-219 | 10 CDC25C   |
| GTSE1     | 4,13E-222 | 0,902401 | 0,909 | 0,029 | 7,89E-218 | 10 GTSE1    |

|          |           |          |       |       |           |    |          |
|----------|-----------|----------|-------|-------|-----------|----|----------|
| NEK2     | 5,54E-222 | 0,313803 | 0,527 | 0,005 | 1,06E-217 | 10 | NEK2     |
| TTK      | 3,23E-217 | 0,275066 | 0,582 | 0,008 | 6,18E-213 | 10 | TTK      |
| MKI67    | 2,12E-215 | 1,481472 | 0,982 | 0,038 | 4,05E-211 | 10 | MKI67    |
| SKA1     | 3,48E-213 | 0,381819 | 0,818 | 0,023 | 6,65E-209 | 10 | SKA1     |
| HMMR     | 5,87E-210 | 0,695682 | 0,764 | 0,02  | 1,12E-205 | 10 | HMMR     |
| FAM111B  | 3,65E-207 | 0,314799 | 0,455 | 0,004 | 6,98E-203 | 10 | FAM111B  |
| KIF14    | 8,95E-206 | 0,368384 | 0,618 | 0,011 | 1,71E-201 | 10 | KIF14    |
| CENPU    | 6,32E-193 | 0,844034 | 0,945 | 0,041 | 1,21E-188 | 10 | CENPU    |
| HIST1H1B | 2,89E-192 | 0,411165 | 0,473 | 0,005 | 5,52E-188 | 10 | HIST1H1B |
| PBK      | 3,82E-192 | 0,92205  | 0,873 | 0,032 | 7,31E-188 | 10 | PBK      |
| KIF4A    | 3,95E-185 | 0,365574 | 0,6   | 0,012 | 7,55E-181 | 10 | KIF4A    |
| BUB1     | 8,67E-182 | 0,35687  | 0,673 | 0,017 | 1,66E-177 | 10 | BUB1     |
| NCAPG    | 6,27E-176 | 0,370436 | 0,727 | 0,022 | 1,20E-171 | 10 | NCAPG    |
| SHCBP1   | 9,84E-175 | 0,544807 | 0,745 | 0,025 | 1,88E-170 | 10 | SHCBP1   |
| CDCA2    | 7,46E-174 | 0,52073  | 0,764 | 0,027 | 1,43E-169 | 10 | CDCA2    |
| RAD51AP1 | 7,08E-172 | 0,54368  | 0,836 | 0,035 | 1,35E-167 | 10 | RAD51AP1 |
| DLGAP5   | 7,13E-164 | 0,670164 | 0,745 | 0,027 | 1,36E-159 | 10 | DLGAP5   |
| HJURP    | 2,43E-161 | 0,423409 | 0,691 | 0,023 | 4,64E-157 | 10 | HJURP    |
| SKA3     | 2,12E-160 | 0,3603   | 0,745 | 0,027 | 4,04E-156 | 10 | SKA3     |
| MYBL2    | 2,66E-159 | 0,566764 | 0,764 | 0,031 | 5,09E-155 | 10 | MYBL2    |
| CLSPN    | 3,85E-156 | 0,764324 | 0,818 | 0,037 | 7,36E-152 | 10 | CLSPN    |
| FAM64A   | 2,98E-146 | 0,557288 | 0,673 | 0,024 | 5,71E-142 | 10 | FAM64A   |
| CENPA    | 1,76E-144 | 0,862046 | 0,873 | 0,049 | 3,37E-140 | 10 | CENPA    |
| TACC3    | 5,38E-143 | 0,73652  | 0,873 | 0,05  | 1,03E-138 | 10 | TACC3    |
| E2F1     | 5,85E-143 | 0,465862 | 0,727 | 0,031 | 1,12E-138 | 10 | E2F1     |
| CDCA5    | 5,41E-142 | 0,420018 | 0,709 | 0,03  | 1,04E-137 | 10 | CDCA5    |
| UBE2C    | 7,83E-142 | 1,389487 | 0,836 | 0,046 | 1,50E-137 | 10 | UBE2C    |
| CENPF    | 4,39E-141 | 1,624554 | 0,945 | 0,063 | 8,40E-137 | 10 | CENPF    |
| LMNB1    | 4,45E-141 | 0,42098  | 0,745 | 0,034 | 8,51E-137 | 10 | LMNB1    |
| CDC6     | 2,40E-137 | 0,523476 | 0,618 | 0,022 | 4,60E-133 | 10 | CDC6     |
| MYBL1    | 1,42E-132 | 0,347158 | 0,673 | 0,028 | 2,72E-128 | 10 | MYBL1    |
| TRIP13   | 1,11E-128 | 0,434429 | 0,764 | 0,04  | 2,12E-124 | 10 | TRIP13   |
| ORC6     | 1,76E-128 | 0,511922 | 0,873 | 0,056 | 3,36E-124 | 10 | ORC6     |
| CDCA3    | 1,08E-127 | 0,79824  | 0,782 | 0,044 | 2,06E-123 | 10 | CDCA3    |
| RRM2     | 5,66E-121 | 1,256485 | 0,964 | 0,081 | 1,08E-116 | 10 | RRM2     |
| CCNA2    | 1,72E-118 | 1,035128 | 0,909 | 0,073 | 3,30E-114 | 10 | CCNA2    |
| AURKB    | 1,79E-115 | 0,90961  | 0,909 | 0,075 | 3,43E-111 | 10 | AURKB    |
| MND1     | 4,20E-115 | 0,259862 | 0,6   | 0,026 | 8,02E-111 | 10 | MND1     |
| FAM83D   | 5,34E-114 | 0,379981 | 0,582 | 0,025 | 1,02E-109 | 10 | FAM83D   |
| ANLN     | 3,55E-113 | 0,97807  | 0,927 | 0,08  | 6,79E-109 | 10 | ANLN     |
| CDC20    | 7,85E-108 | 1,414407 | 0,855 | 0,067 | 1,50E-103 | 10 | CDC20    |
| GINS2    | 1,03E-107 | 0,543389 | 0,818 | 0,06  | 1,97E-103 | 10 | GINS2    |
| MAD2L1   | 4,01E-107 | 0,752853 | 0,945 | 0,086 | 7,67E-103 | 10 | MAD2L1   |
| PRC1     | 4,06E-100 | 1,053359 | 0,909 | 0,09  | 7,77E-96  | 10 | PRC1     |
| TCF19    | 4,67E-100 | 0,450778 | 0,8   | 0,063 | 8,92E-96  | 10 | TCF19    |
| KIF11    | 5,86E-96  | 0,348005 | 0,709 | 0,049 | 1,12E-91  | 10 | KIF11    |
| CENPK    | 2,01E-94  | 0,778033 | 0,927 | 0,1   | 3,84E-90  | 10 | CENPK    |
| RACGAP1  | 5,60E-91  | 0,546387 | 0,836 | 0,079 | 1,07E-86  | 10 | RACGAP1  |
| ZWINT    | 1,19E-87  | 0,944988 | 1     | 0,135 | 2,27E-83  | 10 | ZWINT    |
| BIRC5    | 1,07E-85  | 1,396344 | 0,982 | 0,132 | 2,04E-81  | 10 | BIRC5    |

|          |          |          |       |       |          |              |
|----------|----------|----------|-------|-------|----------|--------------|
| AURKA    | 1,37E-84 | 1,190072 | 0,836 | 0,088 | 2,62E-80 | 10 AURKA     |
| TOP2A    | 2,67E-84 | 1,610576 | 0,909 | 0,114 | 5,11E-80 | 10 TOP2A     |
| SPC24    | 1,03E-83 | 0,436987 | 0,745 | 0,064 | 1,97E-79 | 10 SPC24     |
| NUSAP1   | 3,12E-83 | 1,111317 | 0,909 | 0,11  | 5,96E-79 | 10 NUSAP1    |
| ASPM     | 6,91E-83 | 0,990033 | 0,927 | 0,116 | 1,32E-78 | 10 ASPM      |
| PLK1     | 7,04E-83 | 0,634925 | 0,636 | 0,046 | 1,35E-78 | 10 PLK1      |
| CENPE    | 4,00E-82 | 0,649404 | 0,764 | 0,072 | 7,66E-78 | 10 CENPE     |
| ATAD5    | 1,05E-81 | 0,389266 | 0,673 | 0,052 | 2,00E-77 | 10 ATAD5     |
| CDT1     | 2,42E-81 | 0,640419 | 0,782 | 0,079 | 4,62E-77 | 10 CDT1      |
| PSMC3IP  | 1,07E-80 | 0,498151 | 0,764 | 0,072 | 2,05E-76 | 10 PSMC3IP   |
| KIF20B   | 1,77E-80 | 0,821551 | 0,927 | 0,122 | 3,39E-76 | 10 KIF20B    |
| CDK1     | 1,12E-78 | 0,930482 | 0,8   | 0,087 | 2,14E-74 | 10 CDK1      |
| MCM5     | 1,51E-77 | 0,505405 | 0,855 | 0,096 | 2,89E-73 | 10 MCM5      |
| POC1A    | 9,39E-77 | 0,36974  | 0,8   | 0,082 | 1,79E-72 | 10 POC1A     |
| BRCA2    | 5,18E-76 | 0,489566 | 0,673 | 0,057 | 9,90E-72 | 10 BRCA2     |
| NDC80    | 3,95E-72 | 0,443508 | 0,782 | 0,086 | 7,55E-68 | 10 NDC80     |
| RFC3     | 3,51E-70 | 0,335289 | 0,709 | 0,07  | 6,71E-66 | 10 RFC3      |
| CDC45    | 2,64E-68 | 0,353896 | 0,527 | 0,037 | 5,04E-64 | 10 CDC45     |
| NCAPG2   | 3,04E-68 | 0,3284   | 0,727 | 0,075 | 5,81E-64 | 10 NCAPG2    |
| RAD51    | 2,85E-67 | 0,253929 | 0,582 | 0,047 | 5,45E-63 | 10 RAD51     |
| CENPM1   | 4,86E-67 | 0,717903 | 0,945 | 0,159 | 9,30E-63 | 10 CENPM     |
| FANCI    | 1,03E-66 | 0,331864 | 0,764 | 0,086 | 1,97E-62 | 10 FANCI     |
| BRCA1    | 1,29E-65 | 0,36321  | 0,709 | 0,076 | 2,47E-61 | 10 BRCA1     |
| UHRF1    | 1,41E-65 | 0,423958 | 0,709 | 0,077 | 2,70E-61 | 10 UHRF1     |
| HIST1H1D | 1,02E-64 | 0,438285 | 0,4   | 0,022 | 1,95E-60 | 10 HIST1H1D  |
| SGOL2    | 2,95E-64 | 0,773905 | 0,909 | 0,151 | 5,64E-60 | 10 SGOL2     |
| KIF23    | 7,76E-64 | 0,855107 | 0,836 | 0,124 | 1,48E-59 | 10 KIF23     |
| CHAF1A   | 1,28E-59 | 0,515576 | 0,891 | 0,147 | 2,45E-55 | 10 CHAF1A    |
| TPX2     | 1,59E-59 | 1,23109  | 0,909 | 0,172 | 3,05E-55 | 10 TPX2      |
| ARHGAP11 | 3,23E-59 | 0,572188 | 0,8   | 0,12  | 6,17E-55 | 10 ARHGAP11A |
| FOXM1    | 7,88E-59 | 0,450055 | 0,8   | 0,115 | 1,51E-54 | 10 FOXM1     |
| ATAD2    | 1,10E-58 | 0,727196 | 0,855 | 0,145 | 2,10E-54 | 10 ATAD2     |
| MELK     | 5,56E-56 | 0,479284 | 0,873 | 0,154 | 1,06E-51 | 10 MELK      |
| FEN1     | 2,12E-55 | 0,740472 | 0,818 | 0,139 | 4,05E-51 | 10 FEN1      |
| FBXO5    | 2,28E-55 | 0,479993 | 0,745 | 0,106 | 4,36E-51 | 10 FBXO5     |
| CCNB2    | 3,93E-54 | 0,637894 | 0,764 | 0,112 | 7,52E-50 | 10 CCNB2     |
| MCM7     | 3,79E-53 | 0,954259 | 0,909 | 0,185 | 7,25E-49 | 10 MCM7      |
| CCNB1    | 1,03E-52 | 1,268388 | 0,782 | 0,126 | 1,96E-48 | 10 CCNB1     |
| CHAF1B   | 1,75E-51 | 0,25055  | 0,545 | 0,055 | 3,35E-47 | 10 CHAF1B    |
| PRR11    | 9,50E-51 | 0,472553 | 0,655 | 0,087 | 1,82E-46 | 10 PRR11     |
| KIF18A   | 1,03E-50 | 0,271167 | 0,618 | 0,073 | 1,97E-46 | 10 KIF18A    |
| KIAA1524 | 2,43E-50 | 0,307456 | 0,618 | 0,074 | 4,64E-46 | 10 KIAA1524  |
| TROAP    | 1,61E-49 | 0,43238  | 0,636 | 0,08  | 3,08E-45 | 10 TROAP     |
| WDR76    | 4,55E-49 | 0,31945  | 0,618 | 0,077 | 8,71E-45 | 10 WDR76     |
| ZWILCH   | 1,76E-48 | 0,388764 | 0,836 | 0,153 | 3,37E-44 | 10 ZWILCH    |
| C21orf58 | 7,73E-48 | 0,293457 | 0,636 | 0,083 | 1,48E-43 | 10 C21orf58  |
| SPDL1    | 2,16E-46 | 0,532756 | 0,782 | 0,147 | 4,13E-42 | 10 SPDL1     |
| UBE2T    | 3,84E-45 | 1,007148 | 0,982 | 0,315 | 7,34E-41 | 10 UBE2T     |
| PSRC1    | 5,76E-45 | 0,459395 | 0,6   | 0,081 | 1,10E-40 | 10 PSRC1     |
| RNASEH2A | 7,90E-45 | 0,617512 | 0,855 | 0,187 | 1,51E-40 | 10 RNASEH2A  |

|           |          |          |       |       |          |             |
|-----------|----------|----------|-------|-------|----------|-------------|
| MXD3      | 7,95E-44 | 0,343364 | 0,691 | 0,108 | 1,52E-39 | 10 MXD3     |
| HAUS8     | 2,52E-43 | 0,299202 | 0,618 | 0,086 | 4,81E-39 | 10 HAUS8    |
| VRK1      | 3,63E-43 | 0,445308 | 0,8   | 0,153 | 6,95E-39 | 10 VRK1     |
| TK11      | 5,13E-43 | 1,358    | 0,964 | 0,294 | 9,81E-39 | 10 TK1      |
| DSN1      | 1,84E-42 | 0,28886  | 0,709 | 0,115 | 3,52E-38 | 10 DSN1     |
| SMC4      | 4,18E-42 | 1,365787 | 1     | 0,421 | 7,99E-38 | 10 SMC4     |
| TMPO      | 1,05E-41 | 0,954805 | 0,945 | 0,308 | 2,00E-37 | 10 TMPO     |
| TYMS1     | 1,29E-41 | 1,04114  | 0,982 | 0,316 | 2,47E-37 | 10 TYMS     |
| ECT2      | 2,03E-41 | 0,45115  | 0,873 | 0,207 | 3,89E-37 | 10 ECT2     |
| KIAA01012 | 3,81E-41 | 2,078821 | 0,982 | 0,412 | 7,28E-37 | 10 KIAA0101 |
| MCM4      | 1,47E-40 | 0,374722 | 0,764 | 0,147 | 2,81E-36 | 10 MCM4     |
| WHSC1     | 2,97E-40 | 0,593362 | 0,964 | 0,317 | 5,69E-36 | 10 WHSC1    |
| BARD1     | 1,29E-38 | 0,464768 | 0,836 | 0,201 | 2,47E-34 | 10 BARD1    |
| CDCA7     | 2,54E-38 | 0,26417  | 0,527 | 0,069 | 4,86E-34 | 10 CDCA7    |
| FOSL1     | 2,99E-38 | 0,907303 | 0,964 | 0,366 | 5,71E-34 | 10 FOSL1    |
| CENPW1    | 8,48E-38 | 1,065625 | 0,964 | 0,364 | 1,62E-33 | 10 CENPW    |
| GAS2L3    | 1,76E-37 | 0,33965  | 0,727 | 0,145 | 3,37E-33 | 10 GAS2L3   |
| H2AFX     | 1,88E-37 | 1,165058 | 0,982 | 0,49  | 3,59E-33 | 10 H2AFX    |
| CDCA4     | 4,73E-37 | 0,571978 | 0,782 | 0,193 | 9,05E-33 | 10 CDCA4    |
| HMGB2     | 6,64E-37 | 2,189285 | 1     | 0,73  | 1,27E-32 | 10 HMGB2    |
| DBF4      | 8,70E-37 | 0,515068 | 0,909 | 0,257 | 1,66E-32 | 10 DBF4     |
| RFC2      | 1,16E-36 | 0,380409 | 0,8   | 0,178 | 2,22E-32 | 10 RFC2     |
| NRGN      | 1,25E-36 | 0,282734 | 0,673 | 0,117 | 2,39E-32 | 10 NRGN     |
| DEK1      | 2,71E-36 | 1,436642 | 1     | 0,95  | 5,18E-32 | 10 DEK      |
| DNAJC9    | 2,90E-36 | 0,720166 | 0,982 | 0,38  | 5,54E-32 | 10 DNAJC9   |
| NR2C2AP   | 8,73E-36 | 0,303725 | 0,709 | 0,132 | 1,67E-31 | 10 NR2C2AP  |
| CKS1B1    | 7,98E-35 | 1,731534 | 0,982 | 0,526 | 1,53E-30 | 10 CKS1B    |
| SMC2      | 1,11E-34 | 0,684988 | 0,873 | 0,269 | 2,13E-30 | 10 SMC2     |
| H2AFZ1    | 1,43E-34 | 1,994153 | 1     | 0,997 | 2,74E-30 | 10 H2AFZ    |
| KNSTRN    | 1,58E-34 | 0,5375   | 0,764 | 0,184 | 3,03E-30 | 10 KNSTRN   |
| DHFR1     | 4,15E-34 | 0,756089 | 0,964 | 0,383 | 7,94E-30 | 10 DHFR     |
| CKAP2     | 1,07E-33 | 0,9214   | 0,909 | 0,312 | 2,04E-29 | 10 CKAP2    |
| MZT1      | 2,29E-33 | 0,768893 | 1     | 0,482 | 4,37E-29 | 10 MZT1     |
| EZH2      | 2,30E-33 | 0,322401 | 0,636 | 0,123 | 4,40E-29 | 10 EZH2     |
| RFWD3     | 5,86E-33 | 0,297689 | 0,727 | 0,162 | 1,12E-28 | 10 RFWD3    |
| LIG1      | 1,41E-32 | 0,252225 | 0,6   | 0,103 | 2,69E-28 | 10 LIG1     |
| UBE2S1    | 1,43E-32 | 1,95388  | 0,982 | 0,74  | 2,74E-28 | 10 UBE2S    |
| CKS2      | 1,77E-32 | 2,147023 | 0,982 | 0,771 | 3,38E-28 | 10 CKS2     |
| DIAPH3    | 3,51E-32 | 0,585956 | 0,964 | 0,367 | 6,71E-28 | 10 DIAPH3   |
| GMNN      | 5,05E-32 | 0,667835 | 0,945 | 0,39  | 9,65E-28 | 10 GMNN     |
| TEX30     | 8,17E-32 | 0,472389 | 0,891 | 0,279 | 1,56E-27 | 10 TEX30    |
| STRA131   | 1,41E-31 | 1,10957  | 1     | 0,826 | 2,71E-27 | 10 STRA13   |
| CENPN1    | 1,92E-31 | 0,613997 | 0,945 | 0,37  | 3,67E-27 | 10 CENPN    |
| LRR1      | 1,12E-30 | 0,484409 | 0,909 | 0,326 | 2,14E-26 | 10 LRR1     |
| DTYMK1    | 1,23E-30 | 1,14766  | 1     | 0,66  | 2,34E-26 | 10 DTYMK    |
| RANBP11   | 1,32E-30 | 1,296818 | 1     | 0,946 | 2,52E-26 | 10 RANBP1   |
| SYNE2     | 1,66E-30 | 0,255381 | 0,618 | 0,111 | 3,17E-26 | 10 SYNE2    |
| DUT1      | 1,68E-29 | 0,950413 | 1     | 0,925 | 3,22E-25 | 10 DUT      |
| CDKN31    | 2,14E-29 | 1,168215 | 0,873 | 0,334 | 4,09E-25 | 10 CDKN3    |
| DNMT1     | 2,16E-29 | 0,918975 | 0,982 | 0,601 | 4,13E-25 | 10 DNMT1    |



|           |          |          |       |       |          |              |
|-----------|----------|----------|-------|-------|----------|--------------|
| LMNB2     | 3,23E-29 | 0,508181 | 0,927 | 0,337 | 6,18E-25 | 10 LMNB2     |
| SNRPD11   | 3,50E-29 | 1,037567 | 1     | 0,968 | 6,70E-25 | 10 SNRPD1    |
| TNFRSF12A | 4,17E-29 | 1,26361  | 1     | 0,957 | 7,98E-25 | 10 TNFRSF12A |
| STMN11    | 4,26E-29 | 1,691616 | 0,982 | 0,802 | 8,14E-25 | 10 STMN1     |
| ARHGAP11  | 4,76E-29 | 0,347914 | 0,636 | 0,136 | 9,09E-25 | 10 ARHGAP11B |
| YWHAH     | 5,10E-29 | 0,979618 | 1     | 0,959 | 9,76E-25 | 10 YWHAH     |
| NCAPD3    | 8,66E-29 | 0,270842 | 0,655 | 0,142 | 1,66E-24 | 10 NCAPD3    |
| HMGB11    | 1,14E-28 | 1,407444 | 1     | 0,997 | 2,19E-24 | 10 HMGB1     |
| RRM1      | 1,42E-28 | 0,67176  | 0,964 | 0,429 | 2,72E-24 | 10 RRM1      |
| HIST1H1A  | 1,79E-28 | 0,368343 | 0,364 | 0,044 | 3,42E-24 | 10 HIST1H1A  |
| RPL39L1   | 1,98E-28 | 0,921672 | 0,927 | 0,526 | 3,78E-24 | 10 RPL39L    |
| LSM41     | 2,43E-28 | 0,932525 | 1     | 0,964 | 4,65E-24 | 10 LSM4      |
| C4orf46   | 3,35E-28 | 0,275395 | 0,745 | 0,193 | 6,41E-24 | 10 C4orf46   |
| HELLS     | 3,95E-28 | 0,708995 | 0,782 | 0,257 | 7,55E-24 | 10 HELLS     |
| SRSF71    | 9,30E-28 | 1,008205 | 1     | 0,852 | 1,78E-23 | 10 SRSF7     |
| RFC4      | 1,86E-27 | 0,335793 | 0,709 | 0,177 | 3,55E-23 | 10 RFC4      |
| LSM51     | 2,02E-27 | 0,85647  | 1     | 0,943 | 3,87E-23 | 10 LSM5      |
| CCDC34    | 2,16E-27 | 0,556942 | 0,836 | 0,296 | 4,13E-23 | 10 CCDC34    |
| PCNA      | 2,21E-27 | 0,929079 | 0,927 | 0,495 | 4,23E-23 | 10 PCNA      |
| CYCS2     | 3,05E-27 | 0,982126 | 1     | 0,966 | 5,82E-23 | 10 CYCS      |
| HNRNPAB   | 3,85E-27 | 0,927859 | 0,982 | 0,902 | 7,35E-23 | 10 HNRNPAB   |
| MIS18A    | 4,23E-27 | 0,304712 | 0,673 | 0,161 | 8,09E-23 | 10 MIS18A    |
| SNRPB1    | 4,56E-27 | 1,085214 | 1     | 0,981 | 8,72E-23 | 10 SNRPB     |
| C9orf40   | 6,48E-27 | 0,327351 | 0,691 | 0,172 | 1,24E-22 | 10 C9orf40   |
| USP1      | 9,50E-27 | 0,828374 | 0,927 | 0,531 | 1,82E-22 | 10 USP1      |
| PGP       | 1,22E-26 | 0,760526 | 0,982 | 0,714 | 2,34E-22 | 10 PGP       |
| MCM3      | 1,63E-26 | 0,449486 | 0,709 | 0,195 | 3,12E-22 | 10 MCM3      |
| PTTG11    | 1,72E-26 | 1,691547 | 0,873 | 0,412 | 3,30E-22 | 10 PTTG1     |
| SRSF22    | 1,82E-26 | 0,833545 | 1     | 0,954 | 3,48E-22 | 10 SRSF2     |
| TUBA1B2   | 1,96E-26 | 1,744855 | 1     | 0,995 | 3,74E-22 | 10 TUBA1B    |
| BCL2L12   | 2,01E-26 | 0,605074 | 0,909 | 0,427 | 3,85E-22 | 10 BCL2L12   |
| HMG21     | 2,62E-26 | 1,32056  | 1     | 0,994 | 5,02E-22 | 10 HMG21     |
| PA2G42    | 4,29E-26 | 0,888389 | 1     | 0,927 | 8,20E-22 | 10 PA2G4     |
| TMEM106C  | 9,88E-26 | 0,791667 | 0,982 | 0,798 | 1,89E-21 | 10 TMEM106C  |
| POLE3     | 2,11E-25 | 0,370936 | 0,891 | 0,333 | 4,03E-21 | 10 POLE3     |
| POLA2     | 2,13E-25 | 0,279939 | 0,564 | 0,117 | 4,07E-21 | 10 POLA2     |
| NUCKS1    | 4,19E-25 | 0,746641 | 1     | 0,994 | 8,01E-21 | 10 NUCKS1    |
| NDC1      | 5,25E-25 | 0,326874 | 0,709 | 0,189 | 1,00E-20 | 10 NDC1      |
| HN11      | 6,32E-25 | 1,126228 | 0,982 | 0,956 | 1,21E-20 | 10 HN1       |
| PHF191    | 6,97E-25 | 0,85582  | 0,927 | 0,526 | 1,33E-20 | 10 PHF19     |
| RAN2      | 7,16E-25 | 1,145285 | 1     | 0,996 | 1,37E-20 | 10 RAN       |
| RMI2      | 1,01E-24 | 0,260221 | 0,564 | 0,121 | 1,94E-20 | 10 RMI2      |
| WDR34     | 1,08E-24 | 0,535023 | 0,964 | 0,51  | 2,06E-20 | 10 WDR34     |
| AURKAIP11 | 1,17E-24 | 0,654492 | 1     | 0,993 | 2,23E-20 | 10 AURKAIP1  |
| ODC12     | 1,68E-24 | 0,940353 | 1     | 0,767 | 3,22E-20 | 10 ODC1      |
| CENPH     | 1,72E-24 | 0,353707 | 0,727 | 0,215 | 3,29E-20 | 10 CENPH     |
| HIST1H4C  | 1,92E-24 | 2,513346 | 0,964 | 0,89  | 3,67E-20 | 10 HIST1H4C  |
| PRELID12  | 5,54E-24 | 0,739125 | 1     | 0,997 | 1,06E-19 | 10 PRELID1   |
| NUDT15    | 6,13E-24 | 0,37356  | 0,909 | 0,351 | 1,17E-19 | 10 NUDT15    |
| ANP32E1   | 8,02E-24 | 0,773841 | 0,945 | 0,603 | 1,53E-19 | 10 ANP32E    |

|           |          |          |       |       |          |              |
|-----------|----------|----------|-------|-------|----------|--------------|
| SIVA1     | 8,63E-24 | 0,730342 | 1     | 0,981 | 1,65E-19 | 10 SIVA1     |
| IL7R1     | 8,85E-24 | 0,482581 | 0,745 | 0,219 | 1,69E-19 | 10 IL7R      |
| HYLS1     | 1,23E-23 | 0,286635 | 0,709 | 0,199 | 2,36E-19 | 10 HYLS1     |
| PLAU2     | 1,92E-23 | 1,557593 | 0,982 | 0,753 | 3,66E-19 | 10 PLAU      |
| PAICS1    | 1,99E-23 | 0,58432  | 0,982 | 0,635 | 3,80E-19 | 10 PAICS     |
| CDKN2C    | 2,20E-23 | 0,364769 | 0,764 | 0,237 | 4,22E-19 | 10 CDKN2C    |
| TOMM401   | 2,24E-23 | 0,726802 | 1     | 0,684 | 4,29E-19 | 10 TOMM40    |
| TUBB4B2   | 2,33E-23 | 1,565314 | 1     | 0,918 | 4,45E-19 | 10 TUBB4B    |
| SNRPG1    | 2,83E-23 | 0,720026 | 1     | 0,988 | 5,42E-19 | 10 SNRPG     |
| HIST1H1E  | 3,71E-23 | 0,370899 | 0,582 | 0,137 | 7,09E-19 | 10 HIST1H1E  |
| C19orf48  | 4,13E-23 | 0,674826 | 0,964 | 0,575 | 7,90E-19 | 10 C19orf48  |
| FABP51    | 4,75E-23 | 0,554864 | 0,927 | 0,414 | 9,08E-19 | 10 FABP5     |
| TUBB63    | 5,41E-23 | 0,95895  | 1     | 0,972 | 1,03E-18 | 10 TUBB6     |
| CEP78     | 6,39E-23 | 0,324574 | 0,764 | 0,242 | 1,22E-18 | 10 CEP78     |
| HNRNPA2B  | 7,28E-23 | 0,878542 | 1     | 0,993 | 1,39E-18 | 10 HNRNPA2B1 |
| PARP1     | 7,55E-23 | 0,742303 | 0,982 | 0,834 | 1,44E-18 | 10 PARP1     |
| CTNNAL12  | 8,35E-23 | 0,883295 | 0,945 | 0,75  | 1,60E-18 | 10 CTNNAL1   |
| ALYREF1   | 9,90E-23 | 0,575311 | 0,945 | 0,503 | 1,89E-18 | 10 ALYREF    |
| TPM31     | 1,32E-22 | 0,67049  | 1     | 0,982 | 2,53E-18 | 10 TPM3      |
| CBX5      | 1,66E-22 | 0,675839 | 0,982 | 0,777 | 3,17E-18 | 10 CBX5      |
| HN1L      | 1,94E-22 | 0,356147 | 0,891 | 0,365 | 3,71E-18 | 10 HN1L      |
| MT2A2     | 3,13E-22 | 1,858709 | 1     | 0,999 | 5,99E-18 | 10 MT2A      |
| RHEB1     | 3,22E-22 | 0,66069  | 1     | 0,986 | 6,16E-18 | 10 RHEB      |
| RPA31     | 3,76E-22 | 0,756902 | 0,964 | 0,63  | 7,20E-18 | 10 RPA3      |
| LSM31     | 3,80E-22 | 0,642732 | 0,982 | 0,98  | 7,26E-18 | 10 LSM3      |
| CSE1L     | 4,37E-22 | 0,455305 | 0,873 | 0,389 | 8,36E-18 | 10 CSE1L     |
| ATP5G12   | 5,74E-22 | 0,761039 | 0,982 | 0,97  | 1,10E-17 | 10 ATP5G1    |
| POP7      | 6,72E-22 | 0,620792 | 0,982 | 0,824 | 1,28E-17 | 10 POP7      |
| PPP1R14B2 | 1,14E-21 | 1,159076 | 0,982 | 0,965 | 2,18E-17 | 10 PPP1R14B  |
| NCAPD2    | 1,24E-21 | 0,278126 | 0,618 | 0,161 | 2,38E-17 | 10 NCAPD2    |
| SSRP11    | 1,45E-21 | 0,656575 | 0,964 | 0,774 | 2,78E-17 | 10 SSRP1     |
| SAC3D1    | 1,75E-21 | 0,508734 | 0,909 | 0,463 | 3,35E-17 | 10 SAC3D1    |
| CD3EAP    | 1,88E-21 | 0,297647 | 0,673 | 0,192 | 3,60E-17 | 10 CD3EAP    |
| CBX1      | 1,93E-21 | 0,658617 | 1     | 0,799 | 3,69E-17 | 10 CBX1      |
| CDKN2D    | 2,30E-21 | 0,45751  | 0,764 | 0,268 | 4,39E-17 | 10 CDKN2D    |
| KPNB1     | 3,17E-21 | 0,664254 | 1     | 0,972 | 6,06E-17 | 10 KPNB1     |
| DRAP11    | 3,63E-21 | 0,779995 | 1     | 0,997 | 6,95E-17 | 10 DRAP1     |
| NAP1L4    | 4,16E-21 | 0,528394 | 1     | 0,823 | 7,96E-17 | 10 NAP1L4    |
| GPSM2     | 4,23E-21 | 0,269631 | 0,545 | 0,133 | 8,09E-17 | 10 GPSM2     |
| TFAM      | 4,30E-21 | 0,447428 | 0,927 | 0,481 | 8,22E-17 | 10 TFAM      |
| FUS1      | 6,18E-21 | 0,751192 | 1     | 0,93  | 1,18E-16 | 10 FUS       |
| HNRNPR1   | 6,75E-21 | 0,629939 | 1     | 0,899 | 1,29E-16 | 10 HNRNPR    |
| MIS18BP1  | 8,00E-21 | 0,34514  | 0,8   | 0,296 | 1,53E-16 | 10 MIS18BP1  |
| TRIM59    | 8,23E-21 | 0,305112 | 0,618 | 0,169 | 1,57E-16 | 10 TRIM59    |
| DKK13     | 9,57E-21 | 1,338553 | 1     | 0,688 | 1,83E-16 | 10 DKK1      |
| RAD21     | 1,07E-20 | 0,633235 | 1     | 0,787 | 2,04E-16 | 10 RAD21     |
| EBNA1BP2: | 1,16E-20 | 0,82206  | 0,982 | 0,824 | 2,22E-16 | 10 EBNA1BP2  |
| ABHD11    | 1,33E-20 | 0,266511 | 0,727 | 0,237 | 2,54E-16 | 10 ABHD11    |
| PHLDA22   | 1,46E-20 | 0,9395   | 1     | 0,966 | 2,80E-16 | 10 PHLDA2    |
| UBE2I1    | 1,51E-20 | 0,598299 | 1     | 0,983 | 2,89E-16 | 10 UBE2I     |

|           |          |          |       |       |          |             |
|-----------|----------|----------|-------|-------|----------|-------------|
| EIF1AX1   | 1,57E-20 | 0,576411 | 1     | 0,968 | 3,01E-16 | 10 EIF1AX   |
| IL11      | 1,67E-20 | 0,458441 | 0,564 | 0,141 | 3,20E-16 | 10 IL11     |
| BUB3      | 1,88E-20 | 0,686991 | 1     | 0,731 | 3,59E-16 | 10 BUB3     |
| SRSF32    | 2,30E-20 | 0,888    | 1     | 0,977 | 4,40E-16 | 10 SRSF3    |
| HIRIP3    | 2,82E-20 | 0,263524 | 0,6   | 0,165 | 5,39E-16 | 10 HIRIP3   |
| ANP32B    | 3,32E-20 | 0,685379 | 1     | 0,986 | 6,36E-16 | 10 ANP32B   |
| PFN12     | 4,70E-20 | 0,588027 | 1     | 1     | 8,99E-16 | 10 PFN1     |
| SRM2      | 5,44E-20 | 0,823968 | 1     | 0,968 | 1,04E-15 | 10 SRM      |
| TFDP1     | 6,77E-20 | 0,555191 | 0,964 | 0,769 | 1,29E-15 | 10 TFDP1    |
| HSPE11    | 7,94E-20 | 0,749687 | 1     | 0,988 | 1,52E-15 | 10 HSPE1    |
| FAM111A   | 8,77E-20 | 0,57494  | 0,836 | 0,44  | 1,68E-15 | 10 FAM111A  |
| NCL2      | 9,62E-20 | 0,898781 | 1     | 0,989 | 1,84E-15 | 10 NCL      |
| EZR1      | 1,00E-19 | 0,503178 | 0,945 | 0,671 | 1,92E-15 | 10 EZR      |
| SMS1      | 1,04E-19 | 0,817513 | 0,964 | 0,942 | 1,98E-15 | 10 SMS      |
| SDF2L11   | 1,04E-19 | 0,702077 | 0,964 | 0,838 | 2,00E-15 | 10 SDF2L1   |
| HNRNPD2   | 1,30E-19 | 0,682726 | 1     | 0,924 | 2,49E-15 | 10 HNRNPD   |
| FST2      | 1,98E-19 | 1,435349 | 0,945 | 0,66  | 3,79E-15 | 10 FST      |
| TUBB2     | 2,18E-19 | 0,946874 | 1     | 0,999 | 4,17E-15 | 10 TUBB     |
| UBE2M1    | 4,63E-19 | 0,550559 | 0,982 | 0,806 | 8,85E-15 | 10 UBE2M    |
| ARHGDI1A  | 4,89E-19 | 0,560425 | 1     | 0,976 | 9,35E-15 | 10 ARHGDI1A |
| PSIP1     | 5,48E-19 | 0,566385 | 0,964 | 0,742 | 1,05E-14 | 10 PSIP1    |
| COTL12    | 5,53E-19 | 0,670743 | 1     | 0,979 | 1,06E-14 | 10 COTL1    |
| RTKN2     | 6,22E-19 | 0,266816 | 0,727 | 0,253 | 1,19E-14 | 10 RTKN2    |
| NUP62     | 6,28E-19 | 0,433642 | 0,891 | 0,448 | 1,20E-14 | 10 NUP62    |
| SMC1A     | 7,06E-19 | 0,382554 | 0,909 | 0,478 | 1,35E-14 | 10 SMC1A    |
| CCP110    | 8,05E-19 | 0,251709 | 0,691 | 0,218 | 1,54E-14 | 10 CCP110   |
| DDX211    | 9,15E-19 | 0,686521 | 0,982 | 0,81  | 1,75E-14 | 10 DDX21    |
| NASP1     | 1,04E-18 | 0,669922 | 0,927 | 0,609 | 1,99E-14 | 10 NASP     |
| C12orf752 | 1,34E-18 | 0,919529 | 1     | 0,996 | 2,56E-14 | 10 C12orf75 |
| HERC4     | 1,54E-18 | 0,726287 | 0,982 | 0,807 | 2,95E-14 | 10 HERC4    |
| HMGB31    | 1,65E-18 | 0,69958  | 0,873 | 0,495 | 3,15E-14 | 10 HMGB3    |
| PDCD52    | 1,69E-18 | 0,540459 | 1     | 0,989 | 3,22E-14 | 10 PDCD5    |
| ARPC22    | 2,37E-18 | 0,596294 | 1     | 0,999 | 4,54E-14 | 10 ARPC2    |
| NUDT11    | 3,60E-18 | 0,511789 | 0,964 | 0,633 | 6,89E-14 | 10 NUDT1    |
| LYAR      | 3,88E-18 | 0,461651 | 0,836 | 0,433 | 7,41E-14 | 10 LYAR     |
| TUBA1C2   | 4,77E-18 | 1,105143 | 1     | 0,959 | 9,12E-14 | 10 TUBA1C   |
| H3F3B1    | 5,06E-18 | 0,68142  | 1     | 0,997 | 9,68E-14 | 10 H3F3B    |
| CALM22    | 6,99E-18 | 0,779045 | 1     | 1     | 1,34E-13 | 10 CALM2    |
| PTGES31   | 7,23E-18 | 0,66482  | 0,982 | 0,985 | 1,38E-13 | 10 PTGES3   |
| NXT1      | 7,92E-18 | 0,483301 | 0,891 | 0,518 | 1,51E-13 | 10 NXT1     |
| HNRNPA32  | 9,28E-18 | 0,56568  | 1     | 0,97  | 1,77E-13 | 10 HNRNPA3  |
| EIF5      | 9,74E-18 | 0,589335 | 1     | 0,972 | 1,86E-13 | 10 EIF5     |
| NTMT11    | 1,01E-17 | 0,579038 | 1     | 0,932 | 1,93E-13 | 10 NTMT1    |
| CBFB      | 1,12E-17 | 0,320882 | 0,891 | 0,411 | 2,14E-13 | 10 CBFB     |
| NME13     | 1,12E-17 | 0,751111 | 1     | 0,939 | 2,15E-13 | 10 NME1     |
| TPI13     | 1,23E-17 | 0,879777 | 1     | 0,996 | 2,36E-13 | 10 TPI1     |
| ATAD3A    | 1,48E-17 | 0,374795 | 0,836 | 0,387 | 2,83E-13 | 10 ATAD3A   |
| LRRC591   | 1,64E-17 | 0,65543  | 0,982 | 0,929 | 3,14E-13 | 10 LRRC59   |
| POLD3     | 1,98E-17 | 0,256053 | 0,655 | 0,211 | 3,78E-13 | 10 POLD3    |
| STIP11    | 2,14E-17 | 0,47263  | 0,982 | 0,659 | 4,09E-13 | 10 STIP1    |

|           |          |          |       |       |          |             |
|-----------|----------|----------|-------|-------|----------|-------------|
| RPA2      | 3,01E-17 | 0,345983 | 0,8   | 0,343 | 5,76E-13 | 10 RPA2     |
| DDX39A1   | 3,08E-17 | 0,464068 | 0,855 | 0,422 | 5,88E-13 | 10 DDX39A   |
| EMP32     | 3,31E-17 | 0,658497 | 1     | 0,999 | 6,32E-13 | 10 EMP3     |
| PDAP11    | 3,38E-17 | 0,549851 | 1     | 0,971 | 6,46E-13 | 10 PDAP1    |
| SLBP      | 3,65E-17 | 0,650954 | 0,982 | 0,747 | 6,97E-13 | 10 SLBP     |
| H2AFV1    | 3,70E-17 | 0,704472 | 0,982 | 0,934 | 7,08E-13 | 10 H2AFV    |
| NOLC1     | 5,57E-17 | 0,447402 | 0,855 | 0,418 | 1,06E-12 | 10 NOLC1    |
| PHLDA11   | 5,68E-17 | 1,112943 | 0,982 | 0,803 | 1,09E-12 | 10 PHLDA1   |
| PLP21     | 6,22E-17 | 0,711213 | 1     | 0,936 | 1,19E-12 | 10 PLP2     |
| NCAPH2    | 6,83E-17 | 0,334048 | 0,764 | 0,312 | 1,31E-12 | 10 NCAPH2   |
| TOPBP1    | 7,18E-17 | 0,260244 | 0,8   | 0,303 | 1,37E-12 | 10 TOPBP1   |
| REEP4     | 7,85E-17 | 0,357208 | 0,691 | 0,282 | 1,50E-12 | 10 REEP4    |
| CFL12     | 8,02E-17 | 0,574776 | 1     | 1     | 1,53E-12 | 10 CFL1     |
| HSPD12    | 8,60E-17 | 0,759323 | 1     | 0,924 | 1,64E-12 | 10 HSPD1    |
| NOP161    | 9,03E-17 | 0,482406 | 0,891 | 0,478 | 1,73E-12 | 10 NOP16    |
| ATP2B13   | 9,16E-17 | 0,702866 | 1     | 0,985 | 1,75E-12 | 10 ATP2B1   |
| CKLF      | 1,19E-16 | 0,590056 | 0,964 | 0,793 | 2,28E-12 | 10 CKLF     |
| COX8A1    | 1,29E-16 | 0,485628 | 1     | 0,997 | 2,46E-12 | 10 COX8A    |
| LSM2      | 1,42E-16 | 0,56272  | 0,964 | 0,888 | 2,71E-12 | 10 LSM2     |
| EMP2      | 1,90E-16 | 0,352749 | 0,873 | 0,423 | 3,63E-12 | 10 EMP2     |
| HMGA13    | 2,00E-16 | 1,230183 | 0,982 | 0,969 | 3,83E-12 | 10 HMGA1    |
| GMPPB     | 2,12E-16 | 0,390588 | 0,891 | 0,483 | 4,06E-12 | 10 GMPPB    |
| SVIP      | 2,21E-16 | 0,457413 | 0,909 | 0,634 | 4,23E-12 | 10 SVIP     |
| BCL7C1    | 2,26E-16 | 0,575817 | 0,982 | 0,918 | 4,31E-12 | 10 BCL7C    |
| UACA1     | 2,33E-16 | 0,646074 | 0,982 | 0,87  | 4,46E-12 | 10 UACA     |
| ITGB1BP1  | 2,41E-16 | 0,532077 | 0,982 | 0,955 | 4,61E-12 | 10 ITGB1BP1 |
| KPNA21    | 2,84E-16 | 1,091599 | 0,873 | 0,66  | 5,43E-12 | 10 KPNA2    |
| TCEB1     | 2,89E-16 | 0,546591 | 0,982 | 0,986 | 5,52E-12 | 10 TCEB1    |
| MAD2L2    | 3,10E-16 | 0,532986 | 0,927 | 0,65  | 5,93E-12 | 10 MAD2L2   |
| SRRT      | 3,17E-16 | 0,305201 | 0,855 | 0,384 | 6,06E-12 | 10 SRRT     |
| NHP22     | 3,32E-16 | 0,579508 | 0,982 | 0,967 | 6,35E-12 | 10 NHP2     |
| EXOSC8    | 3,88E-16 | 0,463327 | 0,909 | 0,502 | 7,42E-12 | 10 EXOSC8   |
| RNPS1     | 4,26E-16 | 0,530041 | 0,964 | 0,891 | 8,14E-12 | 10 RNPS1    |
| SERPINE11 | 4,39E-16 | 0,380775 | 0,8   | 0,353 | 8,39E-12 | 10 SERPINE1 |
| HAUS6     | 4,80E-16 | 0,298698 | 0,745 | 0,296 | 9,18E-12 | 10 HAUS6    |
| TIMM101   | 4,87E-16 | 0,542638 | 0,964 | 0,835 | 9,31E-12 | 10 TIMM10   |
| TIMM17A1  | 5,75E-16 | 0,481587 | 1     | 0,915 | 1,10E-11 | 10 TIMM17A  |
| MYDGF3    | 7,32E-16 | 0,577407 | 1     | 0,997 | 1,40E-11 | 10 MYDGF    |
| MRPL171   | 8,21E-16 | 0,546278 | 0,982 | 0,875 | 1,57E-11 | 10 MRPL17   |
| ENO13     | 8,46E-16 | 1,032635 | 1     | 0,998 | 1,62E-11 | 10 ENO1     |
| HMG11     | 8,63E-16 | 0,471492 | 1     | 0,999 | 1,65E-11 | 10 HMG11    |
| SAP30     | 9,39E-16 | 0,350299 | 0,818 | 0,366 | 1,80E-11 | 10 SAP30    |
| CLN6      | 9,70E-16 | 0,28043  | 0,818 | 0,381 | 1,85E-11 | 10 CLN6     |
| TCOF1     | 1,13E-15 | 0,282968 | 0,8   | 0,405 | 2,16E-11 | 10 TCOF1    |
| ERH1      | 1,24E-15 | 0,501267 | 1     | 0,994 | 2,37E-11 | 10 ERH      |
| PRPS1     | 1,28E-15 | 0,480587 | 0,873 | 0,482 | 2,45E-11 | 10 PRPS1    |
| MT1E3     | 1,29E-15 | 1,422284 | 1     | 0,962 | 2,46E-11 | 10 MT1E     |
| MKKS1     | 1,63E-15 | 0,524455 | 0,982 | 0,929 | 3,11E-11 | 10 MKKS     |
| SET1      | 1,76E-15 | 0,525479 | 1     | 0,996 | 3,37E-11 | 10 SET      |
| DCBLD21   | 1,86E-15 | 0,561968 | 0,945 | 0,703 | 3,55E-11 | 10 DCBLD2   |

|           |          |          |       |       |          |             |
|-----------|----------|----------|-------|-------|----------|-------------|
| RPA1      | 1,90E-15 | 0,251794 | 0,818 | 0,336 | 3,62E-11 | 10 RPA1     |
| NOP562    | 1,91E-15 | 0,604289 | 0,964 | 0,703 | 3,65E-11 | 10 NOP56    |
| SNRPA11   | 1,92E-15 | 0,401216 | 0,964 | 0,587 | 3,67E-11 | 10 SNRPA1   |
| CAV12     | 1,96E-15 | 0,628926 | 1     | 0,999 | 3,75E-11 | 10 CAV1     |
| C20orf271 | 2,20E-15 | 0,474061 | 0,964 | 0,797 | 4,20E-11 | 10 C20orf27 |
| PHB1      | 2,50E-15 | 0,494952 | 1     | 0,966 | 4,77E-11 | 10 PHB      |
| RAD23A    | 2,84E-15 | 0,50364  | 1     | 0,972 | 5,43E-11 | 10 RAD23A   |
| CARHSP1   | 2,89E-15 | 0,519648 | 1     | 0,991 | 5,53E-11 | 10 CARHSP1  |
| CMC2      | 3,09E-15 | 0,468741 | 0,909 | 0,663 | 5,91E-11 | 10 CMC2     |
| TPRKB     | 3,15E-15 | 0,396109 | 0,945 | 0,731 | 6,02E-11 | 10 TPRKB    |
| SRRM11    | 3,34E-15 | 0,53907  | 1     | 0,924 | 6,38E-11 | 10 SRRM1    |
| PGAM12    | 3,39E-15 | 0,617215 | 1     | 0,994 | 6,48E-11 | 10 PGAM1    |
| PPIF      | 4,08E-15 | 0,393181 | 0,927 | 0,596 | 7,81E-11 | 10 PPIF     |
| RBBP8     | 4,34E-15 | 0,299075 | 0,745 | 0,313 | 8,29E-11 | 10 RBBP8    |
| TMEM1581  | 4,46E-15 | 0,653515 | 0,891 | 0,587 | 8,52E-11 | 10 TMEM158  |
| MRPS121   | 4,77E-15 | 0,445089 | 0,982 | 0,938 | 9,12E-11 | 10 MRPS12   |
| BOLA32    | 5,39E-15 | 0,493127 | 1     | 0,871 | 1,03E-10 | 10 BOLA3    |
| BTG3      | 5,76E-15 | 0,45796  | 0,945 | 0,623 | 1,10E-10 | 10 BTG3     |
| ARL6IP1   | 7,31E-15 | 1,076822 | 0,891 | 0,707 | 1,40E-10 | 10 ARL6IP1  |
| TIMM8A    | 7,32E-15 | 0,311241 | 0,782 | 0,345 | 1,40E-10 | 10 TIMM8A   |
| RBMX1     | 7,53E-15 | 0,514707 | 1     | 0,917 | 1,44E-10 | 10 RBMX     |
| SMC31     | 7,73E-15 | 0,481266 | 1     | 0,771 | 1,48E-10 | 10 SMC3     |
| SERBP11   | 7,73E-15 | 0,567989 | 1     | 0,991 | 1,48E-10 | 10 SERBP1   |
| ANAPC11   | 1,06E-14 | 0,424128 | 1     | 0,997 | 2,03E-10 | 10 ANAPC11  |
| MRPL121   | 1,06E-14 | 0,500571 | 1     | 0,924 | 2,03E-10 | 10 MRPL12   |
| MTDH1     | 1,08E-14 | 0,446902 | 1     | 0,993 | 2,06E-10 | 10 MTDH     |
| ARPC5L    | 1,09E-14 | 0,500395 | 0,945 | 0,825 | 2,09E-10 | 10 ARPC5L   |
| GRK6      | 1,13E-14 | 0,332809 | 0,818 | 0,437 | 2,16E-10 | 10 GRK6     |
| PEG10     | 1,30E-14 | 0,263102 | 0,545 | 0,164 | 2,48E-10 | 10 PEG10    |
| CENPV     | 1,37E-14 | 0,426452 | 0,909 | 0,617 | 2,61E-10 | 10 CENPV    |
| HMGA2     | 1,41E-14 | 0,357991 | 0,618 | 0,226 | 2,70E-10 | 10 HMGA2    |
| NT5E1     | 1,55E-14 | 0,466667 | 0,909 | 0,531 | 2,97E-10 | 10 NT5E     |
| GAS63     | 1,58E-14 | 0,76362  | 1     | 0,989 | 3,02E-10 | 10 GAS6     |
| DCTPP1    | 1,69E-14 | 0,338319 | 0,818 | 0,423 | 3,24E-10 | 10 DCTPP1   |
| CBX3      | 1,77E-14 | 0,410551 | 1     | 0,983 | 3,39E-10 | 10 CBX3     |
| G3BP1     | 1,99E-14 | 0,366617 | 0,982 | 0,797 | 3,81E-10 | 10 G3BP1    |
| COX202    | 2,27E-14 | 0,518413 | 0,982 | 0,943 | 4,34E-10 | 10 COX20    |
| CACYBP2   | 2,29E-14 | 0,527435 | 0,982 | 0,812 | 4,38E-10 | 10 CACYBP   |
| RBM8A1    | 2,85E-14 | 0,616241 | 0,982 | 0,921 | 5,45E-10 | 10 RBM8A    |
| PIN11     | 3,24E-14 | 0,418375 | 1     | 0,964 | 6,19E-10 | 10 PIN1     |
| ARF6      | 3,35E-14 | 0,477611 | 1     | 0,92  | 6,41E-10 | 10 ARF6     |
| SPCS3     | 3,60E-14 | 0,424947 | 1     | 0,863 | 6,88E-10 | 10 SPCS3    |
| MANF2     | 3,69E-14 | 0,590063 | 0,982 | 0,879 | 7,06E-10 | 10 MANF     |
| DKC1      | 4,09E-14 | 0,392109 | 0,873 | 0,484 | 7,81E-10 | 10 DKC1     |
| MRPL142   | 4,95E-14 | 0,47761  | 1     | 0,976 | 9,47E-10 | 10 MRPL14   |
| KIF22     | 5,04E-14 | 0,454269 | 0,927 | 0,684 | 9,63E-10 | 10 KIF22    |
| GPATCH41  | 5,07E-14 | 0,465052 | 0,927 | 0,644 | 9,70E-10 | 10 GPATCH4  |
| CMSS1     | 5,54E-14 | 0,304817 | 0,745 | 0,343 | 1,06E-09 | 10 CMSS1    |
| STUB11    | 5,71E-14 | 0,482182 | 1     | 0,984 | 1,09E-09 | 10 STUB1    |
| TMEM14B1  | 6,18E-14 | 0,509639 | 0,982 | 0,973 | 1,18E-09 | 10 TMEM14B  |

|           |          |          |       |       |          |              |
|-----------|----------|----------|-------|-------|----------|--------------|
| SMAGP     | 6,40E-14 | 0,293199 | 0,836 | 0,407 | 1,22E-09 | 10 SMAGP     |
| HNRNPDL1  | 8,26E-14 | 0,560975 | 0,982 | 0,964 | 1,58E-09 | 10 HNRNPDL   |
| CALM31    | 1,15E-13 | 0,516526 | 1     | 0,971 | 2,19E-09 | 10 CALM3     |
| DDX461    | 1,16E-13 | 0,444043 | 1     | 0,946 | 2,21E-09 | 10 DDX46     |
| RAB3B     | 1,28E-13 | 0,41629  | 0,964 | 0,678 | 2,44E-09 | 10 RAB3B     |
| POLD21    | 1,36E-13 | 0,47594  | 0,982 | 0,88  | 2,60E-09 | 10 POLD2     |
| MRPL511   | 1,50E-13 | 0,430799 | 1     | 0,993 | 2,87E-09 | 10 MRPL51    |
| HAT11     | 1,53E-13 | 0,373981 | 0,909 | 0,462 | 2,93E-09 | 10 HAT1      |
| FGF51     | 1,70E-13 | 0,627364 | 0,655 | 0,3   | 3,26E-09 | 10 FGF5      |
| RRP7A     | 1,83E-13 | 0,396946 | 0,873 | 0,549 | 3,50E-09 | 10 RRP7A     |
| GPN3      | 1,89E-13 | 0,264702 | 0,764 | 0,357 | 3,62E-09 | 10 GPN3      |
| MEA1      | 1,96E-13 | 0,382391 | 0,982 | 0,918 | 3,75E-09 | 10 MEA1      |
| C11orf24  | 2,01E-13 | 0,366277 | 0,982 | 0,722 | 3,84E-09 | 10 C11orf24  |
| GTF3A1    | 2,03E-13 | 0,522077 | 0,982 | 0,958 | 3,88E-09 | 10 GTF3A     |
| SNRPE1    | 2,03E-13 | 0,433727 | 0,964 | 0,993 | 3,89E-09 | 10 SNRPE     |
| HIST2H2AC | 2,05E-13 | 0,392613 | 0,582 | 0,223 | 3,93E-09 | 10 HIST2H2AC |
| EMC9      | 2,11E-13 | 0,355171 | 0,873 | 0,486 | 4,04E-09 | 10 EMC9      |
| KIF5B1    | 2,17E-13 | 0,553442 | 1     | 0,972 | 4,15E-09 | 10 KIF5B     |
| MRPL201   | 2,24E-13 | 0,439701 | 0,982 | 0,975 | 4,29E-09 | 10 MRPL20    |
| UAP1      | 2,29E-13 | 0,463898 | 0,891 | 0,511 | 4,38E-09 | 10 UAP1      |
| RGMB      | 2,30E-13 | 0,36577  | 0,8   | 0,395 | 4,39E-09 | 10 RGMB      |
| RER12     | 2,34E-13 | 0,412983 | 1     | 0,981 | 4,47E-09 | 10 RER1      |
| FAM101B   | 2,35E-13 | 0,517545 | 0,891 | 0,758 | 4,49E-09 | 10 FAM101B   |
| GGCT      | 2,49E-13 | 0,403946 | 0,927 | 0,712 | 4,77E-09 | 10 GGCT      |
| PTP4A2    | 2,55E-13 | 0,452378 | 0,982 | 0,985 | 4,88E-09 | 10 PTP4A2    |
| CFAP20    | 2,62E-13 | 0,32415  | 0,873 | 0,526 | 5,00E-09 | 10 CFAP20    |
| EIF5A3    | 2,99E-13 | 0,577519 | 0,964 | 0,898 | 5,72E-09 | 10 EIF5A     |
| RBM17     | 3,10E-13 | 0,452047 | 1     | 0,913 | 5,93E-09 | 10 RBM17     |
| SRSF91    | 3,13E-13 | 0,470603 | 1     | 0,979 | 5,99E-09 | 10 SRSF9     |
| IFRD2     | 3,54E-13 | 0,386203 | 0,945 | 0,634 | 6,78E-09 | 10 IFRD2     |
| TUBG1     | 3,65E-13 | 0,444504 | 0,891 | 0,551 | 6,97E-09 | 10 TUBG1     |
| SLC2A4RG  | 3,65E-13 | 0,404919 | 0,927 | 0,731 | 6,97E-09 | 10 SLC2A4RG  |
| CORO1C    | 3,81E-13 | 0,419147 | 1     | 0,917 | 7,29E-09 | 10 CORO1C    |
| CALM12    | 4,04E-13 | 0,460046 | 1     | 0,991 | 7,72E-09 | 10 CALM1     |
| SUPT16H1  | 4,23E-13 | 0,42765  | 0,982 | 0,728 | 8,09E-09 | 10 SUPT16H   |
| SLC20A1   | 4,25E-13 | 0,390399 | 0,855 | 0,457 | 8,12E-09 | 10 SLC20A1   |
| LDHA3     | 4,41E-13 | 0,824427 | 1     | 0,993 | 8,43E-09 | 10 LDHA      |
| SKA21     | 4,55E-13 | 0,452522 | 0,964 | 0,843 | 8,70E-09 | 10 SKA2      |
| ICMT      | 4,66E-13 | 0,361587 | 0,945 | 0,713 | 8,91E-09 | 10 ICMT      |
| MRTO4     | 5,18E-13 | 0,409697 | 0,855 | 0,544 | 9,91E-09 | 10 MRTO4     |
| EMG11     | 5,26E-13 | 0,397811 | 0,855 | 0,588 | 1,01E-08 | 10 EMG1      |
| POLR2F1   | 5,44E-13 | 0,40698  | 0,982 | 0,973 | 1,04E-08 | 10 POLR2F    |
| EIF4E     | 5,61E-13 | 0,399521 | 0,964 | 0,785 | 1,07E-08 | 10 EIF4E     |
| PPM1G     | 5,76E-13 | 0,517801 | 0,964 | 0,883 | 1,10E-08 | 10 PPM1G     |
| PRKDC1    | 5,92E-13 | 0,506442 | 0,964 | 0,833 | 1,13E-08 | 10 PRKDC     |
| SUZ12     | 6,08E-13 | 0,337237 | 0,891 | 0,599 | 1,16E-08 | 10 SUZ12     |
| RDX1      | 6,38E-13 | 0,44875  | 1     | 0,945 | 1,22E-08 | 10 RDX       |
| RASSF1    | 6,62E-13 | 0,413984 | 0,909 | 0,597 | 1,27E-08 | 10 RASSF1    |
| SIGMAR11  | 7,06E-13 | 0,377106 | 0,909 | 0,707 | 1,35E-08 | 10 SIGMAR1   |
| RNF126    | 7,14E-13 | 0,414377 | 0,891 | 0,61  | 1,37E-08 | 10 RNF126    |

|            |          |          |       |       |          |               |
|------------|----------|----------|-------|-------|----------|---------------|
| NEDD82     | 7,57E-13 | 0,344671 | 1     | 0,999 | 1,45E-08 | 10 NEDD8      |
| OGFRL11    | 9,12E-13 | 0,474181 | 0,927 | 0,665 | 1,74E-08 | 10 OGFRL1     |
| ITGA21     | 9,50E-13 | 0,474823 | 0,8   | 0,477 | 1,82E-08 | 10 ITGA2      |
| THOP1      | 1,13E-12 | 0,339602 | 0,8   | 0,427 | 2,16E-08 | 10 THOP1      |
| WBP11      | 1,25E-12 | 0,39734  | 0,945 | 0,749 | 2,39E-08 | 10 WBP11      |
| MRPL571    | 1,32E-12 | 0,402706 | 1     | 0,977 | 2,52E-08 | 10 MRPL57     |
| ARHGAP18   | 1,36E-12 | 0,324498 | 0,927 | 0,532 | 2,61E-08 | 10 ARHGAP18   |
| SNAPC11    | 1,50E-12 | 0,376303 | 0,909 | 0,583 | 2,86E-08 | 10 SNAPC1     |
| UBE2N1     | 1,50E-12 | 0,494607 | 1     | 0,925 | 2,87E-08 | 10 UBE2N      |
| SRP91      | 1,56E-12 | 0,438624 | 1     | 0,977 | 2,97E-08 | 10 SRP9       |
| ARF11      | 1,56E-12 | 0,399278 | 1     | 0,99  | 2,98E-08 | 10 ARF1       |
| SNRNP40    | 1,62E-12 | 0,410668 | 0,891 | 0,674 | 3,10E-08 | 10 SNRNP40    |
| EXOSC9     | 1,64E-12 | 0,304975 | 0,636 | 0,269 | 3,14E-08 | 10 EXOSC9     |
| UQCR102    | 1,74E-12 | 0,416743 | 1     | 0,995 | 3,34E-08 | 10 UQCR10     |
| RPL22L13   | 1,91E-12 | 0,642824 | 1     | 0,973 | 3,66E-08 | 10 RPL22L1    |
| WDR5       | 2,08E-12 | 0,264104 | 0,727 | 0,344 | 3,98E-08 | 10 WDR5       |
| HDGF1      | 2,45E-12 | 0,48303  | 0,964 | 0,863 | 4,68E-08 | 10 HDGF       |
| WDR54      | 2,61E-12 | 0,273076 | 0,873 | 0,484 | 4,99E-08 | 10 WDR54      |
| SFXN1      | 2,63E-12 | 0,300253 | 0,891 | 0,497 | 5,04E-08 | 10 SFXN1      |
| SNRPF1     | 2,67E-12 | 0,411906 | 0,982 | 0,982 | 5,11E-08 | 10 SNRPF      |
| SNU132     | 2,72E-12 | 0,444415 | 1     | 0,995 | 5,19E-08 | 10 SNU13      |
| SUMO31     | 3,20E-12 | 0,480861 | 1     | 0,954 | 6,12E-08 | 10 SUMO3      |
| MSH6       | 3,39E-12 | 0,270948 | 0,673 | 0,282 | 6,49E-08 | 10 MSH6       |
| HNRNPM2    | 3,77E-12 | 0,572034 | 1     | 0,878 | 7,22E-08 | 10 HNRNPM     |
| RNF145     | 3,98E-12 | 0,418665 | 1     | 0,818 | 7,60E-08 | 10 RNF145     |
| PSMD22     | 4,00E-12 | 0,614594 | 1     | 0,892 | 7,65E-08 | 10 PSMD2      |
| HNRNPUL1   | 4,10E-12 | 0,352735 | 0,982 | 0,851 | 7,83E-08 | 10 HNRNPUL1   |
| CLIC13     | 4,28E-12 | 0,557116 | 1     | 0,999 | 8,18E-08 | 10 CLIC1      |
| SRSF1      | 4,52E-12 | 0,377551 | 0,945 | 0,8   | 8,65E-08 | 10 SRSF1      |
| CHCHD21    | 4,74E-12 | 0,316292 | 1     | 0,999 | 9,06E-08 | 10 CHCHD2     |
| ARPC1A1    | 4,78E-12 | 0,424121 | 1     | 0,993 | 9,14E-08 | 10 ARPC1A     |
| MRPL42     | 5,00E-12 | 0,384904 | 0,982 | 0,797 | 9,57E-08 | 10 MRPL42     |
| POLR2D     | 5,03E-12 | 0,275417 | 0,8   | 0,393 | 9,63E-08 | 10 POLR2D     |
| SFPQ1      | 5,15E-12 | 0,548979 | 0,982 | 0,942 | 9,84E-08 | 10 SFPQ       |
| BAZ1A      | 5,29E-12 | 0,336834 | 0,945 | 0,681 | 1,01E-07 | 10 BAZ1A      |
| YBX11      | 5,32E-12 | 0,339178 | 1     | 1     | 1,02E-07 | 10 YBX1       |
| RNASEH1    | 5,34E-12 | 0,34893  | 0,945 | 0,805 | 1,02E-07 | 10 RNASEH1    |
| RPS19BP11  | 5,59E-12 | 0,380351 | 1     | 0,974 | 1,07E-07 | 10 RPS19BP1   |
| FTSJ2      | 5,84E-12 | 0,256088 | 0,782 | 0,394 | 1,12E-07 | 10 FTSJ2      |
| CDKN2AIPNL | 5,86E-12 | 0,33494  | 0,836 | 0,527 | 1,12E-07 | 10 CDKN2AIPNL |
| POLR3K     | 6,00E-12 | 0,332342 | 0,855 | 0,528 | 1,15E-07 | 10 POLR3K     |
| AP2S11     | 6,64E-12 | 0,380258 | 1     | 1     | 1,27E-07 | 10 AP2S1      |
| TMED93     | 8,34E-12 | 0,523923 | 1     | 0,988 | 1,59E-07 | 10 TMED9      |
| IKBIP1     | 9,23E-12 | 0,437581 | 1     | 0,817 | 1,76E-07 | 10 IKBIP      |
| GGH1       | 9,30E-12 | 0,380792 | 0,836 | 0,462 | 1,78E-07 | 10 GGH        |
| MLF22      | 9,41E-12 | 0,427442 | 1     | 0,983 | 1,80E-07 | 10 MLF2       |
| EIF2S1     | 9,59E-12 | 0,40165  | 0,945 | 0,713 | 1,83E-07 | 10 EIF2S1     |
| PSMC52     | 9,82E-12 | 0,434981 | 1     | 0,942 | 1,88E-07 | 10 PSMC5      |
| ASPH3      | 9,88E-12 | 0,441164 | 1     | 0,986 | 1,89E-07 | 10 ASPH       |
| NT5DC21    | 1,03E-11 | 0,330949 | 0,945 | 0,632 | 1,97E-07 | 10 NT5DC2     |

|          |          |          |       |       |          |             |
|----------|----------|----------|-------|-------|----------|-------------|
| UQCC21   | 1,03E-11 | 0,415235 | 1     | 0,949 | 1,97E-07 | 10 UQCC2    |
| CCDC14   | 1,06E-11 | 0,395637 | 0,945 | 0,745 | 2,03E-07 | 10 CCDC14   |
| RGS201   | 1,16E-11 | 0,257384 | 0,782 | 0,364 | 2,22E-07 | 10 RGS20    |
| SLC16A33 | 1,21E-11 | 0,576618 | 1     | 0,911 | 2,31E-07 | 10 SLC16A3  |
| SMCHD1   | 1,26E-11 | 0,315066 | 0,982 | 0,721 | 2,40E-07 | 10 SMCHD1   |
| EIF62    | 1,32E-11 | 0,459427 | 1     | 0,964 | 2,53E-07 | 10 EIF6     |
| NF2      | 1,40E-11 | 0,350317 | 0,927 | 0,687 | 2,67E-07 | 10 NF2      |
| WDR43    | 1,41E-11 | 0,326126 | 0,873 | 0,549 | 2,69E-07 | 10 WDR43    |
| ANAPC5   | 1,52E-11 | 0,327109 | 1     | 0,84  | 2,90E-07 | 10 ANAPC5   |
| PCBP1    | 1,56E-11 | 0,380764 | 1     | 0,981 | 2,98E-07 | 10 PCBP1    |
| HNRNPH31 | 1,73E-11 | 0,47417  | 0,964 | 0,842 | 3,30E-07 | 10 HNRNPH3  |
| TRA2B    | 1,76E-11 | 0,416355 | 0,964 | 0,83  | 3,37E-07 | 10 TRA2B    |
| ADRM12   | 1,90E-11 | 0,468022 | 1     | 0,964 | 3,63E-07 | 10 ADRM1    |
| ILF22    | 2,10E-11 | 0,480039 | 1     | 0,859 | 4,02E-07 | 10 ILF2     |
| PHF5A    | 2,15E-11 | 0,37756  | 0,945 | 0,754 | 4,11E-07 | 10 PHF5A    |
| PPP2CA   | 2,25E-11 | 0,375282 | 0,945 | 0,799 | 4,31E-07 | 10 PPP2CA   |
| MRPL11   | 2,27E-11 | 0,339632 | 1     | 0,956 | 4,34E-07 | 10 MRPL11   |
| CCDC137  | 2,28E-11 | 0,40955  | 0,855 | 0,576 | 4,36E-07 | 10 CCDC137  |
| MAPRE1   | 2,29E-11 | 0,421099 | 0,964 | 0,818 | 4,38E-07 | 10 MAPRE1   |
| CISD31   | 2,31E-11 | 0,360549 | 0,964 | 0,847 | 4,42E-07 | 10 CISD3    |
| CALR3    | 2,40E-11 | 0,530842 | 1     | 0,998 | 4,59E-07 | 10 CALR     |
| VPS4A    | 2,50E-11 | 0,323607 | 0,909 | 0,645 | 4,77E-07 | 10 VPS4A    |
| COX171   | 2,52E-11 | 0,445404 | 1     | 0,89  | 4,82E-07 | 10 COX17    |
| CHAMP1   | 2,59E-11 | 0,296253 | 0,964 | 0,636 | 4,96E-07 | 10 CHAMP1   |
| GTF3C61  | 2,70E-11 | 0,401298 | 0,982 | 0,942 | 5,15E-07 | 10 GTF3C6   |
| PFDN21   | 2,74E-11 | 0,45745  | 1     | 0,945 | 5,24E-07 | 10 PFDN2    |
| PITHD1   | 2,74E-11 | 0,311047 | 0,855 | 0,552 | 5,24E-07 | 10 PITHD1   |
| PPIH     | 2,87E-11 | 0,292941 | 0,782 | 0,43  | 5,49E-07 | 10 PPIH     |
| PTBP1    | 2,97E-11 | 0,383818 | 0,964 | 0,78  | 5,68E-07 | 10 PTBP1    |
| PKM3     | 3,17E-11 | 0,687748 | 1     | 0,999 | 6,06E-07 | 10 PKM      |
| FAM136A  | 3,38E-11 | 0,381216 | 0,927 | 0,754 | 6,47E-07 | 10 FAM136A  |
| IMP4     | 3,64E-11 | 0,378308 | 0,945 | 0,764 | 6,96E-07 | 10 IMP4     |
| TMEM160  | 3,78E-11 | 0,376229 | 1     | 0,925 | 7,24E-07 | 10 TMEM160  |
| MORF4L21 | 4,18E-11 | 0,494191 | 1     | 0,994 | 7,99E-07 | 10 MORF4L2  |
| CLTB2    | 4,39E-11 | 0,455435 | 1     | 0,982 | 8,40E-07 | 10 CLTB     |
| LSM71    | 4,75E-11 | 0,427359 | 0,964 | 0,985 | 9,08E-07 | 10 LSM7     |
| PRADC1   | 5,30E-11 | 0,317128 | 0,891 | 0,621 | 1,01E-06 | 10 PRADC1   |
| BRIX13   | 5,35E-11 | 0,795948 | 0,964 | 0,815 | 1,02E-06 | 10 BRIX1    |
| SRGN2    | 5,37E-11 | 0,576933 | 0,891 | 0,64  | 1,03E-06 | 10 SRGN     |
| RHNO1    | 5,73E-11 | 0,298953 | 0,836 | 0,559 | 1,10E-06 | 10 RHNO1    |
| SYNCRIP2 | 6,15E-11 | 0,43634  | 1     | 0,9   | 1,18E-06 | 10 SYNCRIP  |
| DDX18    | 6,46E-11 | 0,335247 | 0,964 | 0,783 | 1,24E-06 | 10 DDX18    |
| STOML21  | 6,78E-11 | 0,409005 | 0,964 | 0,971 | 1,30E-06 | 10 STOML2   |
| C3orf14  | 7,48E-11 | 0,39148  | 0,873 | 0,712 | 1,43E-06 | 10 C3orf14  |
| HNRNPU2  | 9,34E-11 | 0,37004  | 1     | 0,96  | 1,79E-06 | 10 HNRNPU   |
| SMTN1    | 9,52E-11 | 0,424169 | 0,927 | 0,646 | 1,82E-06 | 10 SMTN     |
| EMC61    | 9,57E-11 | 0,402497 | 0,982 | 0,939 | 1,83E-06 | 10 EMC6     |
| SH3BGRL3 | 9,72E-11 | 0,500906 | 1     | 0,997 | 1,86E-06 | 10 SH3BGRL3 |
| MAGOHB   | 1,21E-10 | 0,298384 | 0,836 | 0,58  | 2,31E-06 | 10 MAGOHB   |
| RPL7L11  | 1,21E-10 | 0,409218 | 0,982 | 0,881 | 2,32E-06 | 10 RPL7L1   |



|          |          |          |       |       |          |             |
|----------|----------|----------|-------|-------|----------|-------------|
| CCM2     | 1,40E-10 | 0,363769 | 0,927 | 0,768 | 2,67E-06 | 10 CCM2     |
| DAZAP11  | 1,41E-10 | 0,341462 | 0,927 | 0,719 | 2,70E-06 | 10 DAZAP1   |
| BANF11   | 1,41E-10 | 0,448745 | 1     | 0,966 | 2,70E-06 | 10 BANF1    |
| PMAIP1   | 1,43E-10 | 0,345688 | 0,836 | 0,547 | 2,73E-06 | 10 PMAIP1   |
| CAV21    | 1,52E-10 | 0,412528 | 0,982 | 0,919 | 2,91E-06 | 10 CAV2     |
| NUTF21   | 1,56E-10 | 0,335968 | 0,964 | 0,978 | 2,99E-06 | 10 NUTF2    |
| ILF31    | 1,58E-10 | 0,346201 | 0,982 | 0,801 | 3,02E-06 | 10 ILF3     |
| AXL3     | 1,61E-10 | 0,676997 | 1     | 0,928 | 3,07E-06 | 10 AXL      |
| CCND14   | 1,69E-10 | 0,673266 | 1     | 0,966 | 3,23E-06 | 10 CCND1    |
| C1orf35  | 1,70E-10 | 0,272088 | 0,836 | 0,546 | 3,25E-06 | 10 C1orf35  |
| SPATS2L  | 1,81E-10 | 0,379254 | 1     | 0,988 | 3,45E-06 | 10 SPATS2L  |
| CDK4     | 2,05E-10 | 0,356161 | 0,982 | 0,978 | 3,92E-06 | 10 CDK4     |
| GTF2A21  | 2,23E-10 | 0,425547 | 0,982 | 0,956 | 4,26E-06 | 10 GTF2A2   |
| XPO1     | 2,27E-10 | 0,408223 | 0,982 | 0,713 | 4,35E-06 | 10 XPO1     |
| PDIA63   | 2,31E-10 | 0,49741  | 1     | 0,975 | 4,42E-06 | 10 PDIA6    |
| CENPT    | 2,34E-10 | 0,251459 | 0,782 | 0,423 | 4,48E-06 | 10 CENPT    |
| GAR1     | 2,35E-10 | 0,292978 | 0,945 | 0,577 | 4,49E-06 | 10 GAR1     |
| WBP4     | 2,38E-10 | 0,334492 | 0,964 | 0,722 | 4,55E-06 | 10 WBP4     |
| SRRM2    | 2,52E-10 | 0,359282 | 1     | 0,964 | 4,81E-06 | 10 SRRM2    |
| ZPR1     | 2,52E-10 | 0,287095 | 0,891 | 0,551 | 4,83E-06 | 10 ZPR1     |
| DBI1     | 2,59E-10 | 0,470182 | 1     | 0,999 | 4,95E-06 | 10 DBI      |
| ARL4A    | 2,90E-10 | 0,332107 | 0,855 | 0,541 | 5,54E-06 | 10 ARL4A    |
| UBALD2   | 2,99E-10 | 0,311384 | 0,764 | 0,484 | 5,72E-06 | 10 UBALD2   |
| HSPB111  | 2,99E-10 | 0,353477 | 1     | 0,898 | 5,72E-06 | 10 HSPB11   |
| UPP1     | 3,12E-10 | 0,314583 | 0,909 | 0,695 | 5,97E-06 | 10 UPP1     |
| C1QBP1   | 3,13E-10 | 0,517342 | 1     | 0,962 | 5,98E-06 | 10 C1QBP    |
| RECQL    | 3,68E-10 | 0,289691 | 0,855 | 0,571 | 7,04E-06 | 10 RECQL    |
| SLIRP1   | 3,73E-10 | 0,371858 | 0,982 | 0,988 | 7,13E-06 | 10 SLIRP    |
| SELK     | 3,76E-10 | 0,342836 | 0,982 | 0,927 | 7,20E-06 | 10 SELK     |
| H1FX     | 3,88E-10 | 0,486367 | 0,927 | 0,687 | 7,41E-06 | 10 H1FX     |
| ARHGAP22 | 4,31E-10 | 0,255291 | 0,618 | 0,3   | 8,24E-06 | 10 ARHGAP22 |
| SRSF10   | 4,31E-10 | 0,402236 | 0,982 | 0,86  | 8,24E-06 | 10 SRSF10   |
| LOXL21   | 4,69E-10 | 0,376912 | 0,982 | 0,785 | 8,97E-06 | 10 LOXL2    |
| CKAP42   | 5,08E-10 | 0,392815 | 1     | 0,986 | 9,71E-06 | 10 CKAP4    |
| SAE1     | 5,26E-10 | 0,336282 | 0,909 | 0,729 | 1,01E-05 | 10 SAE1     |
| EEF1E11  | 5,33E-10 | 0,346431 | 0,891 | 0,635 | 1,02E-05 | 10 EEF1E1   |
| SF3B21   | 5,41E-10 | 0,409612 | 1     | 0,942 | 1,03E-05 | 10 SF3B2    |
| MRPS341  | 5,52E-10 | 0,387859 | 1     | 0,954 | 1,06E-05 | 10 MRPS34   |
| TOMM221  | 5,64E-10 | 0,399159 | 1     | 0,972 | 1,08E-05 | 10 TOMM22   |
| FUBP1    | 5,92E-10 | 0,330045 | 0,855 | 0,547 | 1,13E-05 | 10 FUBP1    |
| RAB321   | 6,07E-10 | 0,391435 | 0,982 | 0,991 | 1,16E-05 | 10 RAB32    |
| ARL6IP6  | 6,26E-10 | 0,290386 | 0,745 | 0,406 | 1,20E-05 | 10 ARL6IP6  |
| ID11     | 6,36E-10 | 0,655689 | 0,945 | 0,756 | 1,22E-05 | 10 ID1      |
| MRPL18   | 6,70E-10 | 0,368517 | 1     | 0,916 | 1,28E-05 | 10 MRPL18   |
| DERA     | 6,86E-10 | 0,285363 | 0,945 | 0,649 | 1,31E-05 | 10 DERA     |
| CHCHD3   | 7,50E-10 | 0,293413 | 0,982 | 0,848 | 1,44E-05 | 10 CHCHD3   |
| NDUFS61  | 7,63E-10 | 0,33037  | 1     | 0,997 | 1,46E-05 | 10 NDUFS6   |
| DPM2     | 8,60E-10 | 0,317582 | 0,927 | 0,745 | 1,65E-05 | 10 DPM2     |
| RALBP1   | 8,99E-10 | 0,349844 | 1     | 0,947 | 1,72E-05 | 10 RALBP1   |
| NIPA2    | 9,06E-10 | 0,323702 | 0,945 | 0,803 | 1,73E-05 | 10 NIPA2    |

|           |          |          |       |       |          |               |
|-----------|----------|----------|-------|-------|----------|---------------|
| HSP90AA1: | 9,45E-10 | 0,68118  | 1     | 0,999 | 1,81E-05 | 10 HSP90AA1   |
| VDAC32    | 9,73E-10 | 0,384594 | 0,982 | 0,919 | 1,86E-05 | 10 VDAC3      |
| CKAP5     | 9,78E-10 | 0,276345 | 0,782 | 0,473 | 1,87E-05 | 10 CKAP5      |
| ARPP19    | 1,03E-09 | 0,330821 | 0,945 | 0,798 | 1,96E-05 | 10 ARPP19     |
| RPL26L11  | 1,12E-09 | 0,36001  | 1     | 0,943 | 2,13E-05 | 10 RPL26L1    |
| LBR       | 1,13E-09 | 0,262565 | 0,818 | 0,493 | 2,17E-05 | 10 LBR        |
| C20orf241 | 1,20E-09 | 0,360545 | 1     | 0,918 | 2,30E-05 | 10 C20orf24   |
| RRS1      | 1,22E-09 | 0,26607  | 0,691 | 0,374 | 2,33E-05 | 10 RRS1       |
| EXOSC3    | 1,22E-09 | 0,323466 | 0,855 | 0,59  | 2,33E-05 | 10 EXOSC3     |
| WSB2      | 1,25E-09 | 0,341383 | 0,945 | 0,766 | 2,39E-05 | 10 WSB2       |
| ATP5G33   | 1,27E-09 | 0,358603 | 1     | 0,997 | 2,43E-05 | 10 ATP5G3     |
| MCMBP     | 1,29E-09 | 0,255346 | 0,818 | 0,456 | 2,46E-05 | 10 MCMBP      |
| APIP      | 1,32E-09 | 0,283051 | 0,927 | 0,618 | 2,53E-05 | 10 APIP       |
| HYI1      | 1,36E-09 | 0,272399 | 0,945 | 0,659 | 2,59E-05 | 10 HYI        |
| POLR2H    | 1,42E-09 | 0,27468  | 0,909 | 0,713 | 2,72E-05 | 10 POLR2H     |
| FARSA     | 1,45E-09 | 0,285364 | 0,836 | 0,511 | 2,77E-05 | 10 FARSA      |
| MYC       | 1,57E-09 | 0,269804 | 0,727 | 0,408 | 3,00E-05 | 10 MYC        |
| SLC35B2   | 1,64E-09 | 0,346754 | 0,982 | 0,838 | 3,14E-05 | 10 SLC35B2    |
| PLAUR1    | 1,69E-09 | 0,554211 | 0,909 | 0,696 | 3,24E-05 | 10 PLAUR      |
| MRPL27    | 1,78E-09 | 0,352866 | 1     | 0,958 | 3,41E-05 | 10 MRPL27     |
| MGLL      | 1,79E-09 | 0,397323 | 0,964 | 0,933 | 3,42E-05 | 10 MGLL       |
| C9orf142  | 1,82E-09 | 0,343615 | 0,927 | 0,763 | 3,48E-05 | 10 C9orf142   |
| RPS261    | 1,89E-09 | 0,271134 | 1     | 1     | 3,61E-05 | 10 RPS26      |
| PPP1CA1   | 1,92E-09 | 0,375022 | 1     | 0,968 | 3,67E-05 | 10 PPP1CA     |
| ABCE1     | 1,92E-09 | 0,342294 | 0,855 | 0,614 | 3,68E-05 | 10 ABCE1      |
| ACTN41    | 1,93E-09 | 0,329056 | 1     | 0,951 | 3,70E-05 | 10 ACTN4      |
| LYPD1     | 2,02E-09 | 0,27101  | 0,636 | 0,296 | 3,87E-05 | 10 LYPD1      |
| CYC12     | 2,36E-09 | 0,467369 | 0,982 | 0,962 | 4,50E-05 | 10 CYC1       |
| GADD45GII | 2,53E-09 | 0,332686 | 1     | 0,993 | 4,84E-05 | 10 GADD45GIP1 |
| TOMM34    | 2,53E-09 | 0,268284 | 0,764 | 0,424 | 4,84E-05 | 10 TOMM34     |
| PTMS1     | 2,61E-09 | 0,368146 | 1     | 0,998 | 4,98E-05 | 10 PTMS       |
| SNRNP25   | 2,65E-09 | 0,281831 | 0,982 | 0,893 | 5,07E-05 | 10 SNRNP25    |
| ARPC51    | 2,65E-09 | 0,394505 | 1     | 0,99  | 5,08E-05 | 10 ARPC5      |
| PTP4A1    | 2,67E-09 | 0,321263 | 0,982 | 0,895 | 5,11E-05 | 10 PTP4A1     |
| MRPL55    | 2,71E-09 | 0,307486 | 0,982 | 0,914 | 5,18E-05 | 10 MRPL55     |
| XRCC52    | 2,83E-09 | 0,569809 | 0,964 | 0,938 | 5,40E-05 | 10 XRCC5      |
| TIMM50    | 3,14E-09 | 0,277312 | 0,945 | 0,7   | 6,00E-05 | 10 TIMM50     |
| HGF1      | 3,18E-09 | 0,491625 | 1     | 0,802 | 6,08E-05 | 10 HGF        |
| MRPS11    | 3,22E-09 | 0,360783 | 0,964 | 0,907 | 6,15E-05 | 10 MRPS11     |
| GNB21     | 3,62E-09 | 0,314825 | 0,982 | 0,985 | 6,91E-05 | 10 GNB2       |
| FAM207A   | 3,94E-09 | 0,307659 | 0,927 | 0,757 | 7,54E-05 | 10 FAM207A    |
| PSMG3     | 4,27E-09 | 0,299636 | 0,891 | 0,683 | 8,17E-05 | 10 PSMG3      |
| RIC8A     | 4,33E-09 | 0,264574 | 0,945 | 0,714 | 8,28E-05 | 10 RIC8A      |
| KRT102    | 4,36E-09 | 0,398956 | 1     | 0,988 | 8,33E-05 | 10 KRT10      |
| BRD7      | 4,48E-09 | 0,275975 | 0,982 | 0,79  | 8,56E-05 | 10 BRD7       |
| RBBP71    | 4,57E-09 | 0,353294 | 0,964 | 0,847 | 8,75E-05 | 10 RBBP7      |
| SMARCA4   | 4,71E-09 | 0,311278 | 0,927 | 0,773 | 9,01E-05 | 10 SMARCA4    |
| NAA50     | 4,93E-09 | 0,371899 | 0,964 | 0,866 | 9,42E-05 | 10 NAA50      |
| NUDC2     | 5,03E-09 | 0,45468  | 0,982 | 0,923 | 9,62E-05 | 10 NUDC       |
| TRIM28    | 5,61E-09 | 0,340309 | 0,964 | 0,768 | 0,000107 | 10 TRIM28     |

|          |          |          |       |       |          |            |
|----------|----------|----------|-------|-------|----------|------------|
| SCML1    | 6,05E-09 | 0,329922 | 0,836 | 0,595 | 0,000116 | 10 SCML1   |
| RNF26    | 6,29E-09 | 0,298601 | 0,891 | 0,655 | 0,00012  | 10 RNF26   |
| ACTB1    | 6,62E-09 | 0,338205 | 1     | 1     | 0,000127 | 10 ACTB    |
| LSM6     | 7,20E-09 | 0,311522 | 0,927 | 0,831 | 0,000138 | 10 LSM6    |
| CISD2    | 7,62E-09 | 0,326938 | 0,945 | 0,812 | 0,000146 | 10 CISD2   |
| MRPL521  | 7,87E-09 | 0,389295 | 0,982 | 0,972 | 0,00015  | 10 MRPL52  |
| COA1     | 8,24E-09 | 0,312546 | 0,964 | 0,796 | 0,000158 | 10 COA1    |
| NUCB21   | 8,34E-09 | 0,335074 | 1     | 0,915 | 0,00016  | 10 NUCB2   |
| SNRNP702 | 8,84E-09 | 0,425393 | 0,982 | 0,881 | 0,000169 | 10 SNRNP70 |
| EIF3J    | 9,63E-09 | 0,302789 | 1     | 0,894 | 0,000184 | 10 EIF3J   |
| EWSR11   | 9,98E-09 | 0,303803 | 0,964 | 0,835 | 0,000191 | 10 EWSR1   |
| CCT52    | 1,03E-08 | 0,514364 | 0,964 | 0,878 | 0,000197 | 10 CCT5    |
| TAF91    | 1,04E-08 | 0,304016 | 0,982 | 0,939 | 0,000198 | 10 TAF9    |
| CD3201   | 1,08E-08 | 0,296028 | 0,909 | 0,666 | 0,000206 | 10 CD320   |
| WNT5B    | 1,10E-08 | 0,285061 | 0,873 | 0,57  | 0,000209 | 10 WNT5B   |
| COMMD41  | 1,11E-08 | 0,35295  | 0,982 | 0,915 | 0,000213 | 10 COMMD4  |
| CCT6A2   | 1,13E-08 | 0,390235 | 0,964 | 0,923 | 0,000217 | 10 CCT6A   |
| MT-ATP61 | 1,16E-08 | 0,357736 | 1     | 1     | 0,000221 | 10 MT-ATP6 |
| MT-ND61  | 1,22E-08 | 0,41211  | 0,964 | 0,881 | 0,000233 | 10 MT-ND6  |
| CDC372   | 1,24E-08 | 0,397277 | 0,964 | 0,968 | 0,000237 | 10 CDC37   |
| PRDX3    | 1,26E-08 | 0,341202 | 0,982 | 0,924 | 0,00024  | 10 PRDX3   |
| RALA     | 1,30E-08 | 0,327402 | 0,945 | 0,851 | 0,000248 | 10 RALA    |
| HNRNPH1  | 1,31E-08 | 0,381339 | 0,945 | 0,845 | 0,000251 | 10 HNRNPH1 |
| YWHAB2   | 1,36E-08 | 0,298681 | 0,982 | 0,995 | 0,000261 | 10 YWHAB   |
| ANXA23   | 1,39E-08 | 0,6118   | 1     | 1     | 0,000266 | 10 ANXA2   |
| RPP30    | 1,51E-08 | 0,286499 | 0,873 | 0,661 | 0,000289 | 10 RPP30   |
| EIF5A2   | 1,54E-08 | 0,31226  | 0,873 | 0,614 | 0,000294 | 10 EIF5A2  |
| TAGLN21  | 1,59E-08 | 0,376367 | 1     | 0,989 | 0,000304 | 10 TAGLN2  |
| COA41    | 1,59E-08 | 0,322895 | 0,964 | 0,9   | 0,000305 | 10 COA4    |
| DYNLL11  | 1,60E-08 | 0,407279 | 1     | 0,998 | 0,000305 | 10 DYNLL1  |
| IMP3     | 1,66E-08 | 0,339446 | 0,964 | 0,805 | 0,000317 | 10 IMP3    |
| POLR2E1  | 1,78E-08 | 0,302032 | 1     | 0,974 | 0,00034  | 10 POLR2E  |
| UBA2     | 1,89E-08 | 0,273436 | 0,927 | 0,703 | 0,000362 | 10 UBA2    |
| VASP1    | 1,99E-08 | 0,322559 | 0,982 | 0,894 | 0,000381 | 10 VASP    |
| FKBP21   | 2,03E-08 | 0,312734 | 1     | 0,986 | 0,000388 | 10 FKBP2   |
| PSME22   | 2,16E-08 | 0,472707 | 0,964 | 0,953 | 0,000412 | 10 PSME2   |
| KIFC3    | 2,17E-08 | 0,316592 | 0,964 | 0,722 | 0,000416 | 10 KIFC3   |
| KHDRBS1  | 2,30E-08 | 0,320407 | 1     | 0,959 | 0,00044  | 10 KHDRBS1 |
| RIF1     | 2,32E-08 | 0,255009 | 0,891 | 0,573 | 0,000444 | 10 RIF1    |
| FBL1     | 2,43E-08 | 0,331799 | 0,964 | 0,93  | 0,000464 | 10 FBL     |
| UQCC3    | 2,50E-08 | 0,323085 | 0,927 | 0,842 | 0,000478 | 10 UQCC3   |
| PLEKHJ1  | 2,58E-08 | 0,264176 | 0,982 | 0,835 | 0,000493 | 10 PLEKHJ1 |
| AUP1     | 2,59E-08 | 0,270992 | 0,982 | 0,892 | 0,000495 | 10 AUP1    |
| SPHK1    | 2,64E-08 | 0,298968 | 0,709 | 0,4   | 0,000504 | 10 SPHK1   |
| MED10    | 2,65E-08 | 0,317796 | 0,945 | 0,815 | 0,000507 | 10 MED10   |
| COMMD7   | 2,68E-08 | 0,303097 | 0,982 | 0,937 | 0,000512 | 10 COMMD7  |
| PMVK     | 2,74E-08 | 0,270161 | 0,964 | 0,827 | 0,000523 | 10 PMVK    |
| TXNDC12  | 2,92E-08 | 0,290161 | 0,945 | 0,744 | 0,000558 | 10 TXNDC12 |
| SZRD1    | 2,93E-08 | 0,262493 | 0,964 | 0,835 | 0,000559 | 10 SZRD1   |
| MZT2B1   | 3,15E-08 | 0,291143 | 1     | 0,996 | 0,000602 | 10 MZT2B   |

|           |          |          |       |       |          |              |
|-----------|----------|----------|-------|-------|----------|--------------|
| PRMT12    | 3,18E-08 | 0,426534 | 0,982 | 0,887 | 0,000607 | 10 PRMT1     |
| CCT22     | 3,47E-08 | 0,47248  | 1     | 0,903 | 0,000663 | 10 CCT2      |
| MRPL37    | 3,48E-08 | 0,305868 | 0,945 | 0,876 | 0,000665 | 10 MRPL37    |
| PAK2      | 3,60E-08 | 0,291298 | 0,945 | 0,862 | 0,000688 | 10 PAK2      |
| MRPL41    | 3,61E-08 | 0,302256 | 1     | 0,991 | 0,00069  | 10 MRPL41    |
| MAP2K31   | 3,74E-08 | 0,289954 | 0,873 | 0,641 | 0,000715 | 10 MAP2K3    |
| SMARCB1   | 3,75E-08 | 0,292977 | 0,945 | 0,731 | 0,000716 | 10 SMARCB1   |
| HSP90B12  | 3,76E-08 | 0,500792 | 1     | 0,966 | 0,000719 | 10 HSP90B1   |
| YWHAZ     | 3,80E-08 | 0,274222 | 1     | 0,991 | 0,000727 | 10 YWHAZ     |
| PXMP2     | 3,94E-08 | 0,255894 | 0,891 | 0,656 | 0,000753 | 10 PXMP2     |
| NOC2L     | 4,06E-08 | 0,298348 | 0,927 | 0,696 | 0,000777 | 10 NOC2L     |
| PRRC2C    | 4,15E-08 | 0,317183 | 1     | 0,971 | 0,000793 | 10 PRRC2C    |
| FKBP1A2   | 4,68E-08 | 0,288529 | 1     | 0,996 | 0,000894 | 10 FKBP1A    |
| TXNL4A1   | 4,78E-08 | 0,316152 | 0,982 | 0,95  | 0,000914 | 10 TXNL4A    |
| VMA21     | 4,84E-08 | 0,256932 | 0,964 | 0,792 | 0,000926 | 10 VMA21     |
| NOP10     | 4,92E-08 | 0,278629 | 1     | 0,995 | 0,00094  | 10 NOP10     |
| UBE2V2    | 5,17E-08 | 0,33755  | 0,982 | 0,925 | 0,000988 | 10 UBE2V2    |
| SF3B4     | 5,29E-08 | 0,295042 | 0,909 | 0,659 | 0,001011 | 10 SF3B4     |
| LRRFIP2   | 5,31E-08 | 0,354313 | 0,945 | 0,843 | 0,001015 | 10 LRRFIP2   |
| PDLIM5    | 5,45E-08 | 0,273603 | 0,891 | 0,68  | 0,001042 | 10 PDLIM5    |
| ZCCHC17   | 5,45E-08 | 0,270511 | 0,982 | 0,88  | 0,001042 | 10 ZCCHC17   |
| PDXK      | 5,56E-08 | 0,298203 | 0,945 | 0,892 | 0,001064 | 10 PDXK      |
| POP5      | 5,69E-08 | 0,31632  | 0,818 | 0,604 | 0,001088 | 10 POP5      |
| NES       | 5,77E-08 | 0,367217 | 0,745 | 0,473 | 0,001104 | 10 NES       |
| MRPL361   | 5,86E-08 | 0,280921 | 1     | 0,95  | 0,00112  | 10 MRPL36    |
| NUDCD2    | 6,23E-08 | 0,286815 | 0,927 | 0,733 | 0,001191 | 10 NUDCD2    |
| HNRNPK2   | 6,24E-08 | 0,409414 | 1     | 0,995 | 0,001194 | 10 HNRNPK    |
| RANGAP1   | 6,59E-08 | 0,344294 | 0,818 | 0,633 | 0,00126  | 10 RANGAP1   |
| SSNA1     | 6,76E-08 | 0,325242 | 0,964 | 0,961 | 0,001293 | 10 SSNA1     |
| HNRNPC1   | 6,87E-08 | 0,360715 | 1     | 0,985 | 0,001314 | 10 HNRNPC    |
| MAGOH     | 7,26E-08 | 0,315958 | 0,909 | 0,696 | 0,001388 | 10 MAGOH     |
| HNRNPF1   | 7,66E-08 | 0,380571 | 1     | 0,955 | 0,001465 | 10 HNRNPF    |
| PNN       | 8,07E-08 | 0,344061 | 0,909 | 0,776 | 0,001543 | 10 PNN       |
| PPP4C1    | 8,08E-08 | 0,31912  | 1     | 0,968 | 0,001546 | 10 PPP4C     |
| CD591     | 8,21E-08 | 0,320002 | 1     | 0,997 | 0,00157  | 10 CD59      |
| PTRF1     | 8,47E-08 | 0,278406 | 1     | 1     | 0,00162  | 10 PTRF      |
| S100A113  | 8,69E-08 | 0,299803 | 1     | 1     | 0,001661 | 10 S100A11   |
| TM4SF11   | 8,74E-08 | 0,680054 | 0,673 | 0,41  | 0,001672 | 10 TM4SF1    |
| NDUFAB11  | 9,00E-08 | 0,300768 | 0,964 | 0,935 | 0,001721 | 10 NDUFAB1   |
| PPP1CC    | 9,05E-08 | 0,256798 | 0,982 | 0,926 | 0,001731 | 10 PPP1CC    |
| BDKRB11   | 9,32E-08 | 0,336892 | 0,873 | 0,666 | 0,001782 | 10 BDKRB1    |
| MRPS161   | 9,76E-08 | 0,317806 | 1     | 0,957 | 0,001867 | 10 MRPS16    |
| PTMA3     | 1,09E-07 | 0,384627 | 1     | 1     | 0,002091 | 10 PTMA      |
| PTX3      | 1,11E-07 | 0,499515 | 0,564 | 0,258 | 0,002113 | 10 PTX3      |
| MCFD2     | 1,17E-07 | 0,302024 | 1     | 0,927 | 0,00224  | 10 MCFD2     |
| RBPJ      | 1,18E-07 | 0,289213 | 1     | 0,921 | 0,002257 | 10 RBPJ      |
| VIMP1     | 1,18E-07 | 0,32716  | 1     | 0,943 | 0,002259 | 10 VIMP      |
| FAM107B   | 1,21E-07 | 0,297429 | 0,873 | 0,642 | 0,002317 | 10 FAM107B   |
| CDC42EP11 | 1,23E-07 | 0,3225   | 0,945 | 0,854 | 0,00236  | 10 CDC42EP1  |
| LINC00116 | 1,24E-07 | 0,391636 | 0,855 | 0,724 | 0,002368 | 10 LINC00116 |

|          |          |          |       |       |          |             |
|----------|----------|----------|-------|-------|----------|-------------|
| MRPL221  | 1,24E-07 | 0,298869 | 0,982 | 0,875 | 0,002374 | 10 MRPL22   |
| EMC8     | 1,32E-07 | 0,27035  | 0,873 | 0,743 | 0,002523 | 10 EMC8     |
| RFC1     | 1,34E-07 | 0,329203 | 0,891 | 0,786 | 0,002563 | 10 RFC1     |
| RAC12    | 1,34E-07 | 0,286934 | 1     | 0,999 | 0,002565 | 10 RAC1     |
| KATNBL1  | 1,36E-07 | 0,271724 | 0,873 | 0,718 | 0,002592 | 10 KATNBL1  |
| XRCC62   | 1,36E-07 | 0,391248 | 1     | 0,932 | 0,002609 | 10 XRCC6    |
| HGS      | 1,39E-07 | 0,307576 | 0,927 | 0,663 | 0,002652 | 10 HGS      |
| ABCF1    | 1,47E-07 | 0,273514 | 0,964 | 0,848 | 0,002815 | 10 ABCF1    |
| LIMA1    | 1,48E-07 | 0,338304 | 1     | 0,988 | 0,002822 | 10 LIMA1    |
| EIF4H    | 1,53E-07 | 0,265256 | 1     | 0,957 | 0,002919 | 10 EIF4H    |
| KMT5A    | 1,55E-07 | 0,268381 | 0,782 | 0,502 | 0,002966 | 10 KMT5A    |
| ACTR31   | 1,61E-07 | 0,333404 | 0,982 | 0,982 | 0,003074 | 10 ACTR3    |
| GSTO12   | 1,61E-07 | 0,386829 | 1     | 0,994 | 0,003076 | 10 GSTO1    |
| AK2      | 1,61E-07 | 0,251768 | 0,982 | 0,813 | 0,003079 | 10 AK2      |
| TOR1A    | 1,61E-07 | 0,277338 | 0,927 | 0,64  | 0,003083 | 10 TOR1A    |
| SUMO2    | 1,71E-07 | 0,282964 | 1     | 0,998 | 0,003276 | 10 SUMO2    |
| MRPS71   | 1,84E-07 | 0,305368 | 0,964 | 0,873 | 0,003525 | 10 MRPS7    |
| PSMB32   | 1,94E-07 | 0,372519 | 1     | 0,977 | 0,003711 | 10 PSMB3    |
| RUVBL11  | 1,95E-07 | 0,255982 | 0,782 | 0,51  | 0,003727 | 10 RUVBL1   |
| TRAPPC41 | 1,99E-07 | 0,329458 | 0,982 | 0,815 | 0,003799 | 10 TRAPPC4  |
| KHSRP    | 2,05E-07 | 0,269407 | 0,891 | 0,658 | 0,003914 | 10 KHSRP    |
| BZW12    | 2,09E-07 | 0,393934 | 0,945 | 0,966 | 0,004001 | 10 BZW1     |
| RABL6    | 2,13E-07 | 0,253136 | 1     | 0,786 | 0,00407  | 10 RABL6    |
| PSMD71   | 2,14E-07 | 0,302849 | 0,982 | 0,929 | 0,0041   | 10 PSMD7    |
| PARK72   | 2,21E-07 | 0,324535 | 1     | 0,999 | 0,004223 | 10 PARK7    |
| GTPBP4   | 2,25E-07 | 0,266237 | 0,855 | 0,593 | 0,004308 | 10 GTPBP4   |
| NDUFB31  | 2,32E-07 | 0,304767 | 0,982 | 0,976 | 0,004432 | 10 NDUFB3   |
| YDJC     | 2,37E-07 | 0,265345 | 0,927 | 0,641 | 0,004528 | 10 YDJC     |
| TOMM5    | 2,40E-07 | 0,298389 | 0,927 | 0,772 | 0,004596 | 10 TOMM5    |
| ATP1B31  | 2,68E-07 | 0,319797 | 0,982 | 0,956 | 0,005128 | 10 ATP1B3   |
| DNAJC81  | 2,86E-07 | 0,270562 | 1     | 0,957 | 0,005466 | 10 DNAJC8   |
| PSMA73   | 2,89E-07 | 0,373014 | 1     | 0,999 | 0,005521 | 10 PSMA7    |
| EIF4G2   | 2,99E-07 | 0,284888 | 1     | 0,998 | 0,005721 | 10 EIF4G2   |
| UBE2D2   | 3,30E-07 | 0,261368 | 0,982 | 0,966 | 0,006319 | 10 UBE2D2   |
| SMIM15   | 3,65E-07 | 0,26001  | 0,964 | 0,828 | 0,006982 | 10 SMIM15   |
| SRP19    | 3,66E-07 | 0,281712 | 0,964 | 0,853 | 0,007003 | 10 SRP19    |
| PSMD15   | 3,70E-07 | 0,293659 | 1     | 0,843 | 0,007066 | 10 PSMD1    |
| WDR11    | 3,92E-07 | 0,29737  | 1     | 0,989 | 0,007501 | 10 WDR1     |
| HIST1H1C | 3,97E-07 | 0,297216 | 0,727 | 0,456 | 0,007584 | 10 HIST1H1C |
| PUF601   | 4,02E-07 | 0,306707 | 0,945 | 0,808 | 0,007688 | 10 PUF60    |
| LMNA3    | 4,09E-07 | 0,502954 | 1     | 0,998 | 0,007828 | 10 LMNA     |
| ARPC4    | 4,13E-07 | 0,266643 | 1     | 0,95  | 0,007905 | 10 ARPC4    |
| DAD11    | 4,14E-07 | 0,314029 | 0,982 | 0,992 | 0,007911 | 10 DAD1     |
| BDP1     | 4,33E-07 | 0,269793 | 0,927 | 0,731 | 0,008275 | 10 BDP1     |
| ZNF511   | 4,34E-07 | 0,27161  | 0,909 | 0,771 | 0,008293 | 10 ZNF511   |
| PNRC2    | 4,34E-07 | 0,290402 | 0,927 | 0,756 | 0,008308 | 10 PNRC2    |
| TMEM167A | 5,16E-07 | 0,292357 | 1     | 0,961 | 0,00987  | 10 TMEM167A |
| WBSCR222 | 5,26E-07 | 0,278017 | 0,945 | 0,817 | 0,010063 | 10 WBSCR22  |
| F32      | 5,55E-07 | 0,609939 | 0,945 | 0,767 | 0,010609 | 10 F3       |
| POLR2J   | 5,85E-07 | 0,271452 | 0,982 | 0,981 | 0,011184 | 10 POLR2J   |

|           |          |          |       |       |          |    |           |
|-----------|----------|----------|-------|-------|----------|----|-----------|
| CAPN22    | 5,92E-07 | 0,298504 | 1     | 0,984 | 0,011329 | 10 | CAPN2     |
| ELAVL1    | 5,95E-07 | 0,253118 | 0,927 | 0,778 | 0,011369 | 10 | ELAVL1    |
| SPCS21    | 5,95E-07 | 0,324097 | 0,982 | 0,954 | 0,011375 | 10 | SPCS2     |
| EIF4G1    | 6,41E-07 | 0,300922 | 0,982 | 0,882 | 0,012258 | 10 | EIF4G1    |
| GPRC5A2   | 6,89E-07 | 0,442479 | 0,982 | 0,86  | 0,013169 | 10 | GPRC5A    |
| SEC61G2   | 6,98E-07 | 0,265102 | 1     | 0,998 | 0,013343 | 10 | SEC61G    |
| C17orf892 | 6,99E-07 | 0,322017 | 1     | 0,986 | 0,013363 | 10 | C17orf89  |
| ATG3      | 7,12E-07 | 0,261856 | 0,964 | 0,846 | 0,013614 | 10 | ATG3      |
| MAT2A     | 7,32E-07 | 0,332951 | 0,982 | 0,902 | 0,01399  | 10 | MAT2A     |
| UBE2J21   | 7,68E-07 | 0,295162 | 0,909 | 0,833 | 0,01468  | 10 | UBE2J2    |
| TMEM237   | 7,89E-07 | 0,252281 | 0,782 | 0,641 | 0,015087 | 10 | TMEM237   |
| LSM8      | 8,17E-07 | 0,316826 | 0,982 | 0,964 | 0,015627 | 10 | LSM8      |
| BAZ1B     | 8,51E-07 | 0,267208 | 0,964 | 0,835 | 0,016266 | 10 | BAZ1B     |
| CAPZA1    | 9,03E-07 | 0,295164 | 1     | 0,959 | 0,017265 | 10 | CAPZA1    |
| PSMB22    | 9,53E-07 | 0,329141 | 1     | 0,974 | 0,018232 | 10 | PSMB2     |
| ATP6V0B   | 9,73E-07 | 0,253998 | 0,982 | 0,968 | 0,018605 | 10 | ATP6V0B   |
| ARL16     | 9,98E-07 | 0,250178 | 0,982 | 0,858 | 0,019089 | 10 | ARL16     |
| UBE2K     | 1,02E-06 | 0,285674 | 0,891 | 0,88  | 0,01944  | 10 | UBE2K     |
| KXD1      | 1,05E-06 | 0,313249 | 0,982 | 0,92  | 0,020095 | 10 | KXD1      |
| TOP12     | 1,06E-06 | 0,379991 | 0,964 | 0,821 | 0,020199 | 10 | TOP1      |
| VAPA      | 1,08E-06 | 0,278484 | 1     | 0,98  | 0,020689 | 10 | VAPA      |
| EMC41     | 1,18E-06 | 0,334019 | 0,964 | 0,934 | 0,022495 | 10 | EMC4      |
| MRPL33    | 1,19E-06 | 0,284902 | 1     | 0,977 | 0,022668 | 10 | MRPL33    |
| PLIN32    | 1,20E-06 | 0,364352 | 0,982 | 0,928 | 0,022856 | 10 | PLIN3     |
| POLR2L1   | 1,23E-06 | 0,268818 | 1     | 0,999 | 0,023517 | 10 | POLR2L    |
| ANXA14    | 1,28E-06 | 0,466584 | 1     | 0,992 | 0,024422 | 10 | ANXA1     |
| GNG5      | 1,28E-06 | 0,276257 | 1     | 0,996 | 0,02447  | 10 | GNG5      |
| POLE41    | 1,32E-06 | 0,306138 | 1     | 0,975 | 0,025316 | 10 | POLE4     |
| GSPT12    | 1,33E-06 | 0,313332 | 0,927 | 0,863 | 0,025432 | 10 | GSPT1     |
| ASNSD1    | 1,37E-06 | 0,264058 | 0,909 | 0,715 | 0,026179 | 10 | ASNSD1    |
| TSPAN5    | 1,49E-06 | 0,304385 | 0,964 | 0,826 | 0,028439 | 10 | TSPAN5    |
| ARGLU1    | 1,49E-06 | 0,291796 | 0,964 | 0,919 | 0,028542 | 10 | ARGLU1    |
| MEST2     | 1,64E-06 | 0,49957  | 0,945 | 0,83  | 0,031375 | 10 | MEST      |
| PPP1R15A  | 1,76E-06 | 0,284817 | 0,982 | 0,856 | 0,033634 | 10 | PPP1R15A  |
| PSMC32    | 1,84E-06 | 0,361646 | 0,982 | 0,924 | 0,035258 | 10 | PSMC3     |
| MRPS26    | 2,10E-06 | 0,271327 | 0,909 | 0,791 | 0,040201 | 10 | MRPS26    |
| MSN       | 2,38E-06 | 0,259127 | 1     | 0,912 | 0,045444 | 10 | MSN       |
| TNFRSF11B | 2,44E-06 | 0,552753 | 0,982 | 0,901 | 0,046603 | 10 | TNFRSF11B |
| SURF41    | 2,56E-06 | 0,259174 | 0,982 | 0,93  | 0,048922 | 10 | SURF4     |
| GADD45A1  | 2,65E-06 | 0,40695  | 0,964 | 0,815 | 0,050615 | 10 | GADD45A   |
| SFRP12    | 2,68E-06 | 0,52567  | 0,782 | 0,665 | 0,051321 | 10 | SFRP1     |
| NOL72     | 2,73E-06 | 0,273895 | 0,982 | 0,906 | 0,052193 | 10 | NOL7      |
| UBE2L32   | 2,79E-06 | 0,316738 | 1     | 0,989 | 0,053347 | 10 | UBE2L3    |
| MT-ND51   | 2,96E-06 | 0,27752  | 1     | 0,998 | 0,056555 | 10 | MT-ND5    |
| EPS8      | 2,98E-06 | 0,258279 | 0,964 | 0,835 | 0,057002 | 10 | EPS8      |
| NDUFC22   | 3,12E-06 | 0,294217 | 1     | 0,985 | 0,059609 | 10 | NDUFC2    |
| SSSCA1    | 3,13E-06 | 0,257305 | 0,927 | 0,827 | 0,059824 | 10 | SSSCA1    |
| EIF4EBP11 | 3,23E-06 | 0,436216 | 1     | 0,972 | 0,061783 | 10 | EIF4EBP1  |
| NFIC1     | 3,30E-06 | 0,289447 | 0,982 | 0,976 | 0,063026 | 10 | NFIC      |
| TXNDC171  | 3,65E-06 | 0,279871 | 1     | 0,968 | 0,06976  | 10 | TXNDC17   |

|          |          |          |       |       |          |            |
|----------|----------|----------|-------|-------|----------|------------|
| CNIH41   | 3,72E-06 | 0,263601 | 0,945 | 0,917 | 0,071147 | 10 CNIH4   |
| THOC7    | 3,77E-06 | 0,251926 | 1     | 0,932 | 0,072162 | 10 THOC7   |
| ERGIC21  | 3,93E-06 | 0,273457 | 0,945 | 0,91  | 0,075231 | 10 ERGIC2  |
| RUVBL21  | 4,03E-06 | 0,281018 | 0,836 | 0,671 | 0,076982 | 10 RUVBL2  |
| NDUFC11  | 4,10E-06 | 0,259787 | 0,964 | 0,966 | 0,07837  | 10 NDUFC1  |
| RRBP11   | 4,47E-06 | 0,307695 | 1     | 0,989 | 0,085441 | 10 RRBP1   |
| YWHAQ2   | 4,79E-06 | 0,319194 | 1     | 0,993 | 0,091653 | 10 YWHAQ   |
| RNF5     | 5,18E-06 | 0,277748 | 0,818 | 0,646 | 0,09911  | 10 RNF5    |
| ZDHHC121 | 5,48E-06 | 0,335237 | 0,982 | 0,94  | 0,104734 | 10 ZDHHC12 |
| HNRNPA0  | 5,58E-06 | 0,27003  | 0,982 | 0,98  | 0,106711 | 10 HNRNPA0 |
| KDELR22  | 5,60E-06 | 0,255332 | 1     | 0,995 | 0,107073 | 10 KDELR2  |
| IER3IP1  | 6,04E-06 | 0,254875 | 0,982 | 0,927 | 0,115405 | 10 IER3IP1 |
| MRPL31   | 6,25E-06 | 0,275587 | 0,945 | 0,851 | 0,119453 | 10 MRPL3   |
| TIMM8B1  | 6,37E-06 | 0,27011  | 0,982 | 0,977 | 0,121842 | 10 TIMM8B  |
| PSMB63   | 6,63E-06 | 0,28508  | 1     | 0,982 | 0,126737 | 10 PSMB6   |
| C7orf50  | 6,91E-06 | 0,262437 | 1     | 0,955 | 0,132221 | 10 C7orf50 |
| COPRS    | 7,05E-06 | 0,287025 | 0,982 | 0,945 | 0,134731 | 10 COPRS   |
| CNN31    | 7,29E-06 | 0,284664 | 1     | 0,994 | 0,139338 | 10 CNN3    |
| MRPL401  | 8,49E-06 | 0,270679 | 0,982 | 0,897 | 0,162389 | 10 MRPL40  |
| TMSB4X1  | 8,76E-06 | 0,276317 | 1     | 1     | 0,167486 | 10 TMSB4X  |
| MRPS10   | 8,94E-06 | 0,268735 | 0,964 | 0,844 | 0,170856 | 10 MRPS10  |
| PSMD141  | 9,15E-06 | 0,268176 | 0,945 | 0,843 | 0,174914 | 10 PSMD14  |
| ISOC21   | 9,96E-06 | 0,269199 | 0,964 | 0,924 | 0,190516 | 10 ISOC2   |
| EIF4A31  | 9,99E-06 | 0,266247 | 0,836 | 0,674 | 0,191055 | 10 EIF4A3  |
| PEA15    | 1,03E-05 | 0,318986 | 0,964 | 0,905 | 0,196378 | 10 PEA15   |
| TACC1    | 1,10E-05 | 0,26188  | 0,927 | 0,846 | 0,211031 | 10 TACC1   |
| TRIOBP   | 1,15E-05 | 0,269053 | 1     | 0,95  | 0,220627 | 10 TRIOBP  |
| NANS3    | 1,17E-05 | 0,309874 | 0,927 | 0,849 | 0,223185 | 10 NANS    |
| CAP11    | 1,27E-05 | 0,287068 | 1     | 0,992 | 0,242532 | 10 CAP1    |
| PLAT2    | 1,33E-05 | 0,578568 | 0,964 | 0,834 | 0,25399  | 10 PLAT    |
| SSBP12   | 1,40E-05 | 0,254482 | 0,982 | 0,985 | 0,266935 | 10 SSBP1   |
| ANAPC151 | 1,45E-05 | 0,255278 | 0,909 | 0,893 | 0,276536 | 10 ANAPC15 |
| KRT184   | 1,79E-05 | 0,64102  | 0,855 | 0,778 | 0,341894 | 10 KRT18   |
| AAK1     | 1,80E-05 | 0,251535 | 0,964 | 0,878 | 0,344808 | 10 AAK1    |
| CDC25B   | 1,89E-05 | 0,31435  | 0,855 | 0,689 | 0,360628 | 10 CDC25B  |
| NDUFB61  | 1,96E-05 | 0,252    | 0,982 | 0,928 | 0,375681 | 10 NDUFB6  |
| PSMD3    | 2,00E-05 | 0,251503 | 0,873 | 0,793 | 0,381964 | 10 PSMD3   |
| MRPS18C1 | 2,21E-05 | 0,251104 | 0,964 | 0,883 | 0,423309 | 10 MRPS18C |
| PCMT11   | 2,23E-05 | 0,275554 | 0,945 | 0,839 | 0,427086 | 10 PCMT1   |
| PTS1     | 2,26E-05 | 0,278687 | 0,964 | 0,903 | 0,431676 | 10 PTS     |
| SSR31    | 2,35E-05 | 0,273914 | 1     | 0,993 | 0,449427 | 10 SSR3    |
| LMO73    | 2,50E-05 | 0,289366 | 1     | 0,948 | 0,477922 | 10 LMO7    |
| EIF4A12  | 2,51E-05 | 0,488298 | 0,982 | 0,975 | 0,479758 | 10 EIF4A1  |
| PFKP1    | 2,78E-05 | 0,269487 | 0,964 | 0,789 | 0,530685 | 10 PFKP    |
| NDUFA122 | 2,84E-05 | 0,271538 | 1     | 0,926 | 0,542471 | 10 NDUFA12 |
| GLRX31   | 2,86E-05 | 0,260615 | 0,945 | 0,9   | 0,546363 | 10 GLRX3   |
| CCL22    | 2,92E-05 | 0,673977 | 0,927 | 0,777 | 0,559021 | 10 CCL2    |
| MT-ND21  | 2,96E-05 | 0,29183  | 1     | 1     | 0,566447 | 10 MT-ND2  |
| SNRPD3   | 3,11E-05 | 0,280978 | 0,964 | 0,937 | 0,594678 | 10 SNRPD3  |
| THRAP32  | 3,16E-05 | 0,28245  | 0,982 | 0,915 | 0,603478 | 10 THRAP3  |

|            |          |          |       |       |          |    |             |
|------------|----------|----------|-------|-------|----------|----|-------------|
| DNAJB111   | 4,09E-05 | 0,264006 | 0,873 | 0,765 | 0,782353 | 10 | DNAJB11     |
| DHCR24     | 4,16E-05 | 0,260502 | 0,927 | 0,797 | 0,795814 | 10 | DHCR24      |
| SNRPC1     | 4,19E-05 | 0,281848 | 0,982 | 0,937 | 0,800959 | 10 | SNRPC       |
| ABL2       | 4,67E-05 | 0,25051  | 0,855 | 0,661 | 0,893626 | 10 | ABL2        |
| MIR4435-2  | 5,07E-05 | 0,275408 | 1     | 0,954 | 0,969973 | 10 | MIR4435-2HG |
| TCP12      | 5,23E-05 | 0,324826 | 0,982 | 0,935 | 1        | 10 | TCP1        |
| MPC22      | 5,27E-05 | 0,303673 | 0,982 | 0,988 | 1        | 10 | MPC2        |
| CNN1       | 5,92E-05 | 0,269431 | 0,909 | 0,699 | 1        | 10 | CNN1        |
| SLC25A51   | 5,97E-05 | 0,328585 | 1     | 0,988 | 1        | 10 | SLC25A5     |
| MGAT2      | 6,11E-05 | 0,286301 | 0,873 | 0,712 | 1        | 10 | MGAT2       |
| NIFK       | 6,15E-05 | 0,265501 | 0,855 | 0,731 | 1        | 10 | NIFK        |
| TSR31      | 7,70E-05 | 0,263945 | 0,927 | 0,878 | 1        | 10 | TSR3        |
| HDAC21     | 7,87E-05 | 0,283887 | 0,982 | 0,842 | 1        | 10 | HDAC2       |
| CDC421     | 7,94E-05 | 0,270095 | 0,982 | 0,986 | 1        | 10 | CDC42       |
| SMURF22    | 8,14E-05 | 0,294326 | 0,945 | 0,837 | 1        | 10 | SMURF2      |
| HES4       | 8,58E-05 | 0,354477 | 0,855 | 0,695 | 1        | 10 | HES4        |
| BCLAF11    | 0,000104 | 0,26099  | 0,982 | 0,873 | 1        | 10 | BCLAF1      |
| PRSS232    | 0,000108 | 0,257528 | 1     | 0,873 | 1        | 10 | PRSS23      |
| BAX1       | 0,000112 | 0,251118 | 1     | 0,988 | 1        | 10 | BAX         |
| MT1X1      | 0,000115 | 0,313303 | 0,927 | 0,789 | 1        | 10 | MT1X        |
| CCT72      | 0,00012  | 0,275011 | 0,982 | 0,919 | 1        | 10 | CCT7        |
| ID31       | 0,000122 | 0,300856 | 1     | 0,934 | 1        | 10 | ID3         |
| RGCC1      | 0,000141 | 0,267862 | 0,527 | 0,32  | 1        | 10 | RGCC        |
| AC013461.1 | 0,000151 | 0,250791 | 1     | 0,922 | 1        | 10 | AC013461.1  |
| PSMD83     | 0,000158 | 0,294913 | 1     | 0,994 | 1        | 10 | PSMD8       |
| MESDC22    | 0,000163 | 0,251853 | 0,945 | 0,837 | 1        | 10 | MESDC2      |
| CD472      | 0,00018  | 0,282119 | 0,982 | 0,931 | 1        | 10 | CD47        |
| PIF1       | 0,000186 | 0,311597 | 0,436 | 0,257 | 1        | 10 | PIF1        |
| S100A103   | 0,000191 | 0,252541 | 1     | 0,997 | 1        | 10 | S100A10     |
| HSPA91     | 0,000227 | 0,271302 | 0,964 | 0,885 | 1        | 10 | HSPA9       |
| ACTN11     | 0,000544 | 0,27462  | 1     | 0,997 | 1        | 10 | ACTN1       |
| LINC00152  | 0,000582 | 0,267949 | 0,982 | 0,987 | 1        | 10 | LINC00152   |
| CLEC11A1   | 0,000619 | 0,250139 | 0,927 | 0,802 | 1        | 10 | CLEC11A     |
| CTSC2      | 0,000653 | 0,29332  | 1     | 0,999 | 1        | 10 | CTSC        |
| PRDX13     | 0,00098  | 0,293188 | 1     | 1     | 1        | 10 | PRDX1       |
| CYR612     | 0,002273 | 0,513538 | 1     | 0,966 | 1        | 10 | CYR61       |
| CCDC85B1   | 0,003243 | 0,263243 | 1     | 0,995 | 1        | 10 | CCDC85B     |
| HSPA53     | 0,004081 | 0,283797 | 0,982 | 0,976 | 1        | 10 | HSPA5       |
| S100A114   | 1,41E-25 | 1,596777 | 1     | 1     | 2,69E-21 | 11 | S100A11     |
| SKP13      | 6,92E-25 | 1,282359 | 1     | 0,999 | 1,32E-20 | 11 | SKP1        |
| LGALS11    | 3,51E-24 | 0,820806 | 1     | 1     | 6,71E-20 | 11 | LGALS1      |
| PPIA1      | 7,85E-23 | 0,981356 | 1     | 1     | 1,50E-18 | 11 | PPIA        |
| ATP5J21    | 1,18E-21 | 1,009818 | 1     | 0,996 | 2,27E-17 | 11 | ATP5J2      |
| ACTB2      | 2,18E-21 | 1,544836 | 1     | 1     | 4,16E-17 | 11 | ACTB        |
| TPM21      | 3,19E-21 | 1,269675 | 1     | 1     | 6,11E-17 | 11 | TPM2        |
| TMSB101    | 3,15E-20 | 0,699232 | 1     | 1     | 6,03E-16 | 11 | TMSB10      |
| SNRPD2     | 3,71E-20 | 0,98159  | 1     | 0,998 | 7,10E-16 | 11 | SNRPD2      |
| GSTP12     | 4,34E-20 | 1,0306   | 1     | 0,999 | 8,31E-16 | 11 | GSTP1       |
| UBB2       | 8,24E-20 | 1,21409  | 1     | 0,999 | 1,57E-15 | 11 | UBB         |
| USMG52     | 9,35E-20 | 0,987897 | 1     | 0,997 | 1,79E-15 | 11 | USMG5       |



|           |          |          |       |       |          |    |          |
|-----------|----------|----------|-------|-------|----------|----|----------|
| NDUFS5    | 1,04E-19 | 0,864108 | 1     | 0,999 | 1,98E-15 | 11 | NDUFS5   |
| SEC61G3   | 2,39E-19 | 0,917632 | 1     | 0,998 | 4,57E-15 | 11 | SEC61G   |
| MYL12A1   | 2,81E-19 | 1,340161 | 1     | 1     | 5,36E-15 | 11 | MYL12A   |
| ATP5H1    | 6,43E-19 | 0,977898 | 1     | 0,995 | 1,23E-14 | 11 | ATP5H    |
| PRDX14    | 8,33E-19 | 1,134002 | 1     | 1     | 1,59E-14 | 11 | PRDX1    |
| C12orf753 | 1,06E-18 | 1,563934 | 1     | 0,996 | 2,02E-14 | 11 | C12orf75 |
| PFN13     | 1,09E-18 | 0,892276 | 1     | 1     | 2,08E-14 | 11 | PFN1     |
| GSTO13    | 1,21E-18 | 1,318839 | 1     | 0,994 | 2,32E-14 | 11 | GSTO1    |
| S100A6    | 1,52E-18 | 0,865662 | 1     | 1     | 2,91E-14 | 11 | S100A6   |
| COTL13    | 1,68E-18 | 1,31454  | 1     | 0,979 | 3,21E-14 | 11 | COTL1    |
| MINOS11   | 1,69E-18 | 0,935128 | 1     | 0,991 | 3,23E-14 | 11 | MINOS1   |
| NEDD83    | 2,71E-18 | 0,721395 | 1     | 0,999 | 5,18E-14 | 11 | NEDD8    |
| PBK1      | 3,15E-18 | 0,493727 | 0,333 | 0,044 | 6,03E-14 | 11 | PBK      |
| POLR2L2   | 3,37E-18 | 0,843353 | 1     | 0,999 | 6,44E-14 | 11 | POLR2L   |
| UQCRCQ    | 3,98E-18 | 0,74328  | 1     | 1     | 7,61E-14 | 11 | UQCRCQ   |
| VDAC12    | 5,66E-18 | 1,059232 | 1     | 0,988 | 1,08E-13 | 11 | VDAC1    |
| ANXA24    | 6,07E-18 | 1,422214 | 1     | 1     | 1,16E-13 | 11 | ANXA2    |
| COX7A22   | 8,43E-18 | 0,781075 | 1     | 0,999 | 1,61E-13 | 11 | COX7A2   |
| NME14     | 8,93E-18 | 1,228426 | 0,974 | 0,939 | 1,71E-13 | 11 | NME1     |
| TPI14     | 1,76E-17 | 1,157177 | 1     | 0,996 | 3,37E-13 | 11 | TPI1     |
| ANXA51    | 1,87E-17 | 1,000462 | 1     | 1     | 3,58E-13 | 11 | ANXA5    |
| SH3BGRL3  | 2,05E-17 | 1,180993 | 1     | 0,997 | 3,92E-13 | 11 | SH3BGRL3 |
| ALDOA3    | 2,35E-17 | 0,889218 | 1     | 1     | 4,50E-13 | 11 | ALDOA    |
| COX8A2    | 2,43E-17 | 0,85533  | 1     | 0,997 | 4,65E-13 | 11 | COX8A    |
| NDUFA1    | 2,82E-17 | 0,765652 | 0,974 | 0,992 | 5,39E-13 | 11 | NDUFA1   |
| FKBP1A3   | 3,04E-17 | 1,131267 | 1     | 0,996 | 5,81E-13 | 11 | FKBP1A   |
| TMSB4X2   | 3,45E-17 | 0,794122 | 1     | 1     | 6,60E-13 | 11 | TMSB4X   |
| COX7B     | 3,99E-17 | 0,805994 | 1     | 0,996 | 7,63E-13 | 11 | COX7B    |
| S100A104  | 4,03E-17 | 0,983914 | 1     | 0,997 | 7,70E-13 | 11 | S100A10  |
| RHOC1     | 7,43E-17 | 0,991226 | 1     | 0,996 | 1,42E-12 | 11 | RHOC     |
| COX6A1    | 8,05E-17 | 0,882355 | 1     | 0,999 | 1,54E-12 | 11 | COX6A1   |
| MT2A3     | 8,55E-17 | 2,505345 | 1     | 0,999 | 1,64E-12 | 11 | MT2A     |
| MYL12B1   | 2,22E-16 | 0,944833 | 1     | 0,999 | 4,24E-12 | 11 | MYL12B   |
| RPL35     | 2,26E-16 | 0,526436 | 1     | 1     | 4,32E-12 | 11 | RPL35    |
| HINT1     | 2,59E-16 | 0,604565 | 1     | 1     | 4,95E-12 | 11 | HINT1    |
| TBCA      | 3,37E-16 | 0,633786 | 1     | 0,996 | 6,45E-12 | 11 | TBCA     |
| CFL13     | 3,91E-16 | 0,847204 | 1     | 1     | 7,47E-12 | 11 | CFL1     |
| ARF41     | 1,07E-15 | 1,019409 | 1     | 0,993 | 2,04E-11 | 11 | ARF4     |
| GAPDH2    | 1,10E-15 | 0,594587 | 1     | 1     | 2,11E-11 | 11 | GAPDH    |
| TXN1      | 1,64E-15 | 0,826072 | 1     | 1     | 3,14E-11 | 11 | TXN      |
| CALM13    | 2,18E-15 | 0,953177 | 1     | 0,991 | 4,17E-11 | 11 | CALM1    |
| PGAM13    | 2,57E-15 | 1,020101 | 0,974 | 0,995 | 4,91E-11 | 11 | PGAM1    |
| TPM32     | 3,28E-15 | 1,130062 | 1     | 0,982 | 6,27E-11 | 11 | TPM3     |
| ENO14     | 6,11E-15 | 1,146368 | 1     | 0,998 | 1,17E-10 | 11 | ENO1     |
| MYL92     | 8,36E-15 | 1,120882 | 1     | 1     | 1,60E-10 | 11 | MYL9     |
| YWHAQ3    | 1,19E-14 | 0,787998 | 0,974 | 0,993 | 2,28E-10 | 11 | YWHAQ    |
| UBL51     | 1,26E-14 | 0,696147 | 1     | 0,999 | 2,41E-10 | 11 | UBL5     |
| YBX12     | 1,42E-14 | 0,59822  | 1     | 1     | 2,71E-10 | 11 | YBX1     |
| ANXA15    | 1,62E-14 | 1,402604 | 1     | 0,992 | 3,11E-10 | 11 | ANXA1    |
| NDUFB32   | 1,72E-14 | 0,715755 | 1     | 0,976 | 3,28E-10 | 11 | NDUFB3   |

|          |          |          |       |       |          |             |
|----------|----------|----------|-------|-------|----------|-------------|
| RANBP12  | 1,80E-14 | 1,293225 | 0,974 | 0,946 | 3,44E-10 | 11 RANBP1   |
| ARPC41   | 2,05E-14 | 0,84643  | 0,949 | 0,951 | 3,91E-10 | 11 ARPC4    |
| SRP92    | 2,19E-14 | 0,804169 | 0,949 | 0,978 | 4,18E-10 | 11 SRP9     |
| MIF      | 2,34E-14 | 0,730892 | 1     | 0,995 | 4,47E-10 | 11 MIF      |
| PFDN51   | 2,46E-14 | 0,523392 | 1     | 1     | 4,71E-10 | 11 PFDN5    |
| ATP5G13  | 2,76E-14 | 0,872713 | 0,949 | 0,971 | 5,27E-10 | 11 ATP5G1   |
| RAN3     | 2,86E-14 | 1,070887 | 1     | 0,996 | 5,47E-10 | 11 RAN      |
| TSPO     | 3,00E-14 | 0,732696 | 1     | 1     | 5,73E-10 | 11 TSPO     |
| PKM4     | 3,38E-14 | 1,040913 | 1     | 0,999 | 6,46E-10 | 11 PKM      |
| PGK12    | 3,83E-14 | 0,799274 | 0,974 | 0,975 | 7,33E-10 | 11 PGK1     |
| DBI2     | 4,11E-14 | 0,71709  | 1     | 0,999 | 7,87E-10 | 11 DBI      |
| CYCS3    | 4,26E-14 | 1,130836 | 0,974 | 0,967 | 8,14E-10 | 11 CYCS     |
| COX6B1   | 4,47E-14 | 0,564325 | 1     | 0,999 | 8,55E-10 | 11 COX6B1   |
| HSPB12   | 5,05E-14 | 0,830671 | 1     | 1     | 9,66E-10 | 11 HSPB1    |
| PHLDA23  | 5,62E-14 | 1,34119  | 0,949 | 0,967 | 1,08E-09 | 11 PHLDA2   |
| TRIP131  | 6,19E-14 | 0,375861 | 0,308 | 0,05  | 1,18E-09 | 11 TRIP13   |
| UBA52    | 6,32E-14 | 0,421304 | 1     | 1     | 1,21E-09 | 11 UBA52    |
| PRDX23   | 6,97E-14 | 0,807973 | 0,923 | 0,986 | 1,33E-09 | 11 PRDX2    |
| BIRC52   | 7,94E-14 | 1,331433 | 0,513 | 0,142 | 1,52E-09 | 11 BIRC5    |
| CSRP11   | 9,63E-14 | 1,066366 | 1     | 0,985 | 1,84E-09 | 11 CSRP1    |
| DYNLRB1  | 1,12E-13 | 0,697869 | 1     | 0,993 | 2,14E-09 | 11 DYNLRB1  |
| SOD11    | 1,35E-13 | 0,88609  | 1     | 0,998 | 2,58E-09 | 11 SOD1     |
| PARK73   | 1,52E-13 | 0,72286  | 1     | 0,999 | 2,91E-09 | 11 PARK7    |
| PHPT1    | 2,10E-13 | 0,66333  | 1     | 0,997 | 4,01E-09 | 11 PHPT1    |
| LSM42    | 2,10E-13 | 0,88913  | 0,974 | 0,965 | 4,03E-09 | 11 LSM4     |
| HSBP1    | 2,24E-13 | 0,760445 | 1     | 0,992 | 4,29E-09 | 11 HSBP1    |
| ATPIF12  | 2,74E-13 | 0,867172 | 0,949 | 0,991 | 5,25E-09 | 11 ATPIF1   |
| CAPZB1   | 2,89E-13 | 0,766639 | 1     | 0,993 | 5,53E-09 | 11 CAPZB    |
| RPS27L1  | 3,05E-13 | 0,617519 | 1     | 1     | 5,83E-09 | 11 RPS27L   |
| BANF12   | 3,22E-13 | 0,727985 | 0,974 | 0,966 | 6,16E-09 | 11 BANF1    |
| RRM22    | 4,08E-13 | 0,832843 | 0,41  | 0,093 | 7,81E-09 | 11 RRM2     |
| ACTG1    | 4,58E-13 | 0,694617 | 1     | 1     | 8,76E-09 | 11 ACTG1    |
| CMPK1    | 5,45E-13 | 0,711124 | 0,974 | 0,942 | 1,04E-08 | 11 CMPK1    |
| UCHL12   | 5,50E-13 | 0,977161 | 1     | 0,999 | 1,05E-08 | 11 UCHL1    |
| CLTB3    | 6,42E-13 | 0,727436 | 1     | 0,982 | 1,23E-08 | 11 CLTB     |
| TAGLN3   | 6,94E-13 | 1,419523 | 1     | 1     | 1,33E-08 | 11 TAGLN    |
| ATOX11   | 8,59E-13 | 0,579698 | 1     | 0,996 | 1,64E-08 | 11 ATOX1    |
| RPS262   | 8,64E-13 | 0,550677 | 1     | 1     | 1,65E-08 | 11 RPS26    |
| RHOA     | 9,75E-13 | 0,731719 | 1     | 0,997 | 1,86E-08 | 11 RHOA     |
| MYL62    | 1,24E-12 | 0,682508 | 1     | 1     | 2,38E-08 | 11 MYL6     |
| PSMA74   | 1,30E-12 | 0,847158 | 1     | 0,999 | 2,48E-08 | 11 PSMA7    |
| SNRPC2   | 1,30E-12 | 0,783202 | 0,923 | 0,938 | 2,49E-08 | 11 SNRPC    |
| HIGD1A   | 1,61E-12 | 0,775728 | 0,949 | 0,944 | 3,08E-08 | 11 HIGD1A   |
| POMP3    | 1,63E-12 | 0,74515  | 1     | 1     | 3,12E-08 | 11 POMP     |
| LSM32    | 1,68E-12 | 0,76417  | 1     | 0,98  | 3,21E-08 | 11 LSM3     |
| MAP1LC3B | 1,73E-12 | 0,821198 | 1     | 0,992 | 3,31E-08 | 11 MAP1LC3B |
| TK12     | 1,85E-12 | 0,95845  | 0,692 | 0,301 | 3,53E-08 | 11 TK1      |
| NDUFB62  | 2,29E-12 | 0,732479 | 0,949 | 0,929 | 4,37E-08 | 11 NDUFB6   |
| NDUFA6   | 2,30E-12 | 0,692088 | 1     | 0,974 | 4,41E-08 | 11 NDUFA6   |
| CHCHD22  | 2,54E-12 | 0,454802 | 1     | 0,999 | 4,86E-08 | 11 CHCHD2   |

|           |          |          |       |       |          |              |
|-----------|----------|----------|-------|-------|----------|--------------|
| TCEB11    | 2,92E-12 | 0,86003  | 0,949 | 0,986 | 5,59E-08 | 11 TCEB1     |
| VBP1      | 3,18E-12 | 0,688006 | 0,872 | 0,737 | 6,07E-08 | 11 VBP1      |
| NDUFA11   | 3,93E-12 | 0,497977 | 1     | 0,998 | 7,52E-08 | 11 NDUFA11   |
| AP2S12    | 4,31E-12 | 0,550087 | 1     | 1     | 8,24E-08 | 11 AP2S1     |
| FAU       | 4,54E-12 | 0,374714 | 1     | 1     | 8,68E-08 | 11 FAU       |
| NDUFS62   | 4,70E-12 | 0,628512 | 1     | 0,997 | 8,99E-08 | 11 NDUFS6    |
| PSMB33    | 4,71E-12 | 0,980234 | 0,949 | 0,978 | 9,00E-08 | 11 PSMB3     |
| LDHB1     | 5,38E-12 | 0,56105  | 1     | 1     | 1,03E-07 | 11 LDHB      |
| NDUFB2    | 5,89E-12 | 0,812355 | 1     | 0,994 | 1,13E-07 | 11 NDUFB2    |
| ARPC23    | 7,37E-12 | 0,663336 | 1     | 0,999 | 1,41E-07 | 11 ARPC2     |
| UQCR103   | 7,55E-12 | 0,626819 | 0,974 | 0,996 | 1,44E-07 | 11 UQCR10    |
| EIF5A4    | 7,70E-12 | 0,961263 | 0,897 | 0,899 | 1,47E-07 | 11 EIF5A     |
| PSMD84    | 9,01E-12 | 0,83257  | 1     | 0,994 | 1,72E-07 | 11 PSMD8     |
| COX6C     | 1,14E-11 | 0,627274 | 1     | 0,997 | 2,18E-07 | 11 COX6C     |
| PCBD1     | 1,34E-11 | 0,594839 | 0,974 | 0,945 | 2,55E-07 | 11 PCBD1     |
| TAGLN22   | 1,39E-11 | 0,787771 | 0,974 | 0,989 | 2,65E-07 | 11 TAGLN2    |
| ATP5L     | 1,42E-11 | 0,44402  | 1     | 1     | 2,71E-07 | 11 ATP5L     |
| PSMD23    | 1,84E-11 | 0,94444  | 0,897 | 0,893 | 3,51E-07 | 11 PSMD2     |
| NDUFA41   | 2,10E-11 | 0,737312 | 1     | 0,999 | 4,01E-07 | 11 NDUFA4    |
| RPL31     | 2,10E-11 | 0,483691 | 1     | 1     | 4,02E-07 | 11 RPL31     |
| SSBP13    | 2,15E-11 | 0,659181 | 1     | 0,984 | 4,12E-07 | 11 SSBP1     |
| TXNDC172  | 2,41E-11 | 0,768127 | 0,949 | 0,969 | 4,60E-07 | 11 TXNDC17   |
| PDAP12    | 2,79E-11 | 0,697748 | 0,949 | 0,971 | 5,33E-07 | 11 PDAP1     |
| UQCRH     | 3,23E-11 | 0,476843 | 1     | 0,998 | 6,17E-07 | 11 UQCRH     |
| CCND15    | 3,34E-11 | 1,46177  | 0,949 | 0,967 | 6,39E-07 | 11 CCND1     |
| DNAJC82   | 3,36E-11 | 0,723245 | 0,949 | 0,958 | 6,42E-07 | 11 DNAJC8    |
| RNF181    | 3,73E-11 | 0,736053 | 0,974 | 0,976 | 7,13E-07 | 11 RNF181    |
| ECHS11    | 3,81E-11 | 0,683713 | 0,974 | 0,94  | 7,29E-07 | 11 ECHS1     |
| C14orf166 | 3,86E-11 | 0,551812 | 1     | 0,996 | 7,39E-07 | 11 C14orf166 |
| PSME23    | 3,95E-11 | 0,88855  | 0,949 | 0,953 | 7,55E-07 | 11 PSME2     |
| DRAP12    | 4,13E-11 | 0,788611 | 1     | 0,997 | 7,90E-07 | 11 DRAP1     |
| FKBP31    | 4,13E-11 | 0,804021 | 0,923 | 0,881 | 7,90E-07 | 11 FKBP3     |
| ESD1      | 4,63E-11 | 0,658872 | 0,974 | 0,996 | 8,86E-07 | 11 ESD       |
| GNG111    | 5,41E-11 | 0,815325 | 1     | 0,998 | 1,03E-06 | 11 GNG11     |
| UBE2L33   | 5,59E-11 | 0,612332 | 1     | 0,989 | 1,07E-06 | 11 UBE2L3    |
| ATP5B2    | 5,68E-11 | 0,750128 | 1     | 0,994 | 1,09E-06 | 11 ATP5B     |
| AP2M13    | 6,08E-11 | 0,632921 | 1     | 0,998 | 1,16E-06 | 11 AP2M1     |
| PFN21     | 6,64E-11 | 0,75849  | 0,974 | 0,974 | 1,27E-06 | 11 PFN2      |
| CAPZA21   | 7,86E-11 | 0,668171 | 0,974 | 0,969 | 1,50E-06 | 11 CAPZA2    |
| RPL41     | 8,95E-11 | 0,356842 | 1     | 1     | 1,71E-06 | 11 RPL41     |
| NPM12     | 1,11E-10 | 0,717554 | 1     | 1     | 2,12E-06 | 11 NPM1      |
| ROMO1     | 1,20E-10 | 0,710546 | 0,974 | 0,992 | 2,30E-06 | 11 ROMO1     |
| ATP5E1    | 1,43E-10 | 0,493145 | 1     | 1     | 2,74E-06 | 11 ATP5E     |
| RBX11     | 1,57E-10 | 0,634341 | 1     | 0,991 | 3,00E-06 | 11 RBX1      |
| TRAPPC1   | 1,96E-10 | 0,68206  | 0,974 | 0,995 | 3,74E-06 | 11 TRAPPC1   |
| UQCR11    | 2,51E-10 | 0,639322 | 1     | 0,998 | 4,80E-06 | 11 UQCR11    |
| NDUFB82   | 2,67E-10 | 0,64856  | 0,974 | 0,987 | 5,11E-06 | 11 NDUFB8    |
| RPS10     | 2,71E-10 | 0,395085 | 1     | 1     | 5,18E-06 | 11 RPS10     |
| RPL24     | 2,83E-10 | 0,317307 | 1     | 1     | 5,41E-06 | 11 RPL24     |
| PSMB64    | 4,46E-10 | 0,67192  | 1     | 0,982 | 8,52E-06 | 11 PSMB6     |

|          |          |          |       |       |          |    |          |
|----------|----------|----------|-------|-------|----------|----|----------|
| MOCS2    | 5,10E-10 | 0,671697 | 0,872 | 0,869 | 9,75E-06 | 11 | MOCS2    |
| STMN12   | 5,20E-10 | 1,285898 | 0,897 | 0,804 | 9,94E-06 | 11 | STMN1    |
| S100A13  | 5,57E-10 | 0,692085 | 1     | 0,996 | 1,07E-05 | 11 | S100A13  |
| GUK11    | 5,98E-10 | 0,506789 | 1     | 0,998 | 1,14E-05 | 11 | GUK1     |
| MRPL331  | 6,94E-10 | 0,640578 | 0,974 | 0,978 | 1,33E-05 | 11 | MRPL33   |
| HNRNPC2  | 9,98E-10 | 0,836591 | 0,974 | 0,985 | 1,91E-05 | 11 | HNRNPC   |
| EID12    | 1,08E-09 | 0,512831 | 1     | 0,999 | 2,06E-05 | 11 | EID1     |
| COX5B    | 1,15E-09 | 0,450441 | 1     | 0,999 | 2,20E-05 | 11 | COX5B    |
| CALM32   | 1,30E-09 | 0,68715  | 0,923 | 0,972 | 2,49E-05 | 11 | CALM3    |
| VAMP3    | 1,32E-09 | 0,66095  | 0,897 | 0,957 | 2,53E-05 | 11 | VAMP3    |
| RPA32    | 1,35E-09 | 0,641732 | 0,795 | 0,634 | 2,57E-05 | 11 | RPA3     |
| NAP1L11  | 1,45E-09 | 0,575738 | 1     | 0,999 | 2,78E-05 | 11 | NAP1L1   |
| SMS2     | 1,46E-09 | 0,96905  | 1     | 0,942 | 2,80E-05 | 11 | SMS      |
| COPS63   | 1,75E-09 | 0,713588 | 1     | 0,974 | 3,34E-05 | 11 | COPS6    |
| GLO1     | 1,90E-09 | 0,576231 | 0,923 | 0,915 | 3,62E-05 | 11 | GLO1     |
| ADIRF3   | 1,96E-09 | 0,884652 | 0,949 | 0,922 | 3,75E-05 | 11 | ADIRF    |
| HMGA14   | 2,05E-09 | 1,360556 | 0,949 | 0,969 | 3,91E-05 | 11 | HMGA1    |
| DCTN31   | 2,17E-09 | 0,778679 | 0,974 | 0,978 | 4,16E-05 | 11 | DCTN3    |
| MGST32   | 2,20E-09 | 0,582853 | 1     | 0,996 | 4,20E-05 | 11 | MGST3    |
| NDUFC12  | 2,35E-09 | 0,589439 | 0,949 | 0,966 | 4,49E-05 | 11 | NDUFC1   |
| IFITM22  | 2,47E-09 | 0,692966 | 1     | 0,996 | 4,72E-05 | 11 | IFITM2   |
| CFL2     | 2,81E-09 | 0,774787 | 0,974 | 0,975 | 5,37E-05 | 11 | CFL2     |
| PCNP     | 2,97E-09 | 0,585287 | 0,974 | 0,954 | 5,68E-05 | 11 | PCNP     |
| HSPD13   | 3,08E-09 | 0,950886 | 0,897 | 0,926 | 5,89E-05 | 11 | HSPD1    |
| TMA71    | 3,14E-09 | 0,441144 | 1     | 0,999 | 6,01E-05 | 11 | TMA7     |
| SNRPF2   | 3,50E-09 | 0,565728 | 0,974 | 0,982 | 6,70E-05 | 11 | SNRPF    |
| ACTG22   | 3,65E-09 | 0,878938 | 1     | 1     | 6,98E-05 | 11 | ACTG2    |
| NDUFA2   | 4,40E-09 | 0,530212 | 1     | 0,979 | 8,42E-05 | 11 | NDUFA2   |
| TCEB2    | 4,47E-09 | 0,487703 | 1     | 1     | 8,55E-05 | 11 | TCEB2    |
| PRDX62   | 4,49E-09 | 0,796382 | 1     | 0,997 | 8,59E-05 | 11 | PRDX6    |
| RPL27    | 4,82E-09 | 0,286397 | 1     | 1     | 9,22E-05 | 11 | RPL27    |
| HSP90AB1 | 5,04E-09 | 1,016718 | 1     | 0,999 | 9,63E-05 | 11 | HSP90AB1 |
| GLRX32   | 5,53E-09 | 0,742323 | 0,872 | 0,901 | 0,000106 | 11 | GLRX3    |
| ATP5J    | 5,99E-09 | 0,451149 | 1     | 0,996 | 0,000115 | 11 | ATP5J    |
| MEA11    | 6,39E-09 | 0,57363  | 0,897 | 0,919 | 0,000122 | 11 | MEA1     |
| CDC422   | 6,45E-09 | 0,809531 | 0,949 | 0,986 | 0,000123 | 11 | CDC42    |
| PSMB72   | 6,48E-09 | 0,446468 | 0,949 | 0,994 | 0,000124 | 11 | PSMB7    |
| NCL3     | 6,71E-09 | 0,707693 | 0,949 | 0,989 | 0,000128 | 11 | NCL      |
| GTF2H51  | 7,43E-09 | 0,610752 | 0,974 | 0,987 | 0,000142 | 11 | GTF2H5   |
| CLIC14   | 7,91E-09 | 0,582876 | 0,974 | 0,999 | 0,000151 | 11 | CLIC1    |
| SUB1     | 8,02E-09 | 0,466841 | 1     | 0,999 | 0,000153 | 11 | SUB1     |
| PSMA11   | 8,37E-09 | 0,598683 | 0,974 | 0,989 | 0,00016  | 11 | PSMA1    |
| ACOT7    | 8,54E-09 | 0,485339 | 0,846 | 0,751 | 0,000163 | 11 | ACOT7    |
| NDUFB41  | 8,88E-09 | 0,524955 | 1     | 0,997 | 0,00017  | 11 | NDUFB4   |
| TROAP2   | 9,29E-09 | 0,28593  | 0,333 | 0,087 | 0,000178 | 11 | TROAP    |
| HMGN22   | 9,30E-09 | 0,938376 | 0,974 | 0,994 | 0,000178 | 11 | HMGN2    |
| SLIRP2   | 1,00E-08 | 0,630004 | 1     | 0,988 | 0,000192 | 11 | SLIRP    |
| TBCB1    | 1,02E-08 | 0,530017 | 1     | 0,955 | 0,000195 | 11 | TBCB     |
| sep-72   | 1,26E-08 | 0,657815 | 1     | 0,995 | 0,00024  | 11 | 07-sep   |
| LARP61   | 1,70E-08 | 0,621233 | 0,949 | 0,987 | 0,000324 | 11 | LARP6    |

|           |          |          |       |       |          |             |
|-----------|----------|----------|-------|-------|----------|-------------|
| FAM96B    | 1,83E-08 | 0,53046  | 1     | 0,987 | 0,00035  | 11 FAM96B   |
| PHB2      | 1,90E-08 | 0,573914 | 0,923 | 0,967 | 0,000364 | 11 PHB      |
| PSMB52    | 2,06E-08 | 0,435352 | 1     | 0,994 | 0,000394 | 11 PSMB5    |
| SHFM1     | 2,09E-08 | 0,478158 | 1     | 0,997 | 0,000399 | 11 SHFM1    |
| SRP14     | 2,25E-08 | 0,57337  | 1     | 1     | 0,000431 | 11 SRP14    |
| MDH23     | 2,92E-08 | 0,639784 | 1     | 0,986 | 0,000558 | 11 MDH2     |
| ANAPC111  | 3,20E-08 | 0,461824 | 1     | 0,997 | 0,000611 | 11 ANAPC11  |
| CDC202    | 3,25E-08 | 0,503591 | 0,308 | 0,079 | 0,000621 | 11 CDC20    |
| CUTA1     | 3,74E-08 | 0,443046 | 1     | 0,999 | 0,000715 | 11 CUTA     |
| SCP2      | 4,30E-08 | 0,670092 | 0,974 | 0,982 | 0,000821 | 11 SCP2     |
| TALDO12   | 4,45E-08 | 0,544358 | 1     | 0,997 | 0,00085  | 11 TALDO1   |
| COPE2     | 4,50E-08 | 0,589888 | 0,974 | 0,996 | 0,000861 | 11 COPE     |
| ETFA1     | 4,61E-08 | 0,557966 | 0,923 | 0,911 | 0,000882 | 11 ETFA     |
| CCT73     | 5,16E-08 | 0,694042 | 0,897 | 0,921 | 0,000986 | 11 CCT7     |
| KIAA01013 | 5,75E-08 | 1,18728  | 0,667 | 0,419 | 0,0011   | 11 KIAA0101 |
| RPL22     | 5,83E-08 | 0,315848 | 1     | 1     | 0,001114 | 11 RPL22    |
| ENSA      | 6,51E-08 | 0,52326  | 0,949 | 0,904 | 0,001245 | 11 ENSA     |
| NDUFA13   | 6,85E-08 | 0,594907 | 1     | 0,987 | 0,00131  | 11 NDUFA13  |
| NUTF22    | 7,42E-08 | 0,596116 | 0,949 | 0,978 | 0,001419 | 11 NUTF2    |
| EIF3I2    | 7,59E-08 | 0,561914 | 0,974 | 0,992 | 0,001452 | 11 EIF3I    |
| DYNLL12   | 7,69E-08 | 0,585307 | 1     | 0,998 | 0,001471 | 11 DYNLL1   |
| PEBP1     | 8,18E-08 | 0,5125   | 1     | 0,998 | 0,001565 | 11 PEBP1    |
| DSTN      | 8,21E-08 | 0,606432 | 1     | 1     | 0,00157  | 11 DSTN     |
| TOMM51    | 9,37E-08 | 0,415097 | 0,821 | 0,774 | 0,001792 | 11 TOMM5    |
| MRPL522   | 1,06E-07 | 0,541435 | 0,872 | 0,973 | 0,002019 | 11 MRPL52   |
| UBE2N2    | 1,07E-07 | 0,566282 | 0,923 | 0,926 | 0,002045 | 11 UBE2N    |
| SCOC      | 1,09E-07 | 0,643659 | 0,821 | 0,852 | 0,002092 | 11 SCOC     |
| RPL21     | 1,16E-07 | 0,315021 | 1     | 1     | 0,002209 | 11 RPL21    |
| WDR83OS   | 1,23E-07 | 0,48165  | 0,974 | 0,992 | 0,002358 | 11 WDR83OS  |
| COX203    | 1,66E-07 | 0,657386 | 0,897 | 0,945 | 0,003172 | 11 COX20    |
| HSPE12    | 1,71E-07 | 0,681968 | 0,923 | 0,989 | 0,003277 | 11 HSPE1    |
| ATP5C13   | 2,02E-07 | 0,496484 | 0,974 | 0,984 | 0,00386  | 11 ATP5C1   |
| ATP5I     | 2,10E-07 | 0,4947   | 0,923 | 0,992 | 0,004011 | 11 ATP5I    |
| RPL38     | 2,28E-07 | 0,319484 | 1     | 1     | 0,004369 | 11 RPL38    |
| IFI27L2   | 2,32E-07 | 0,507337 | 1     | 0,993 | 0,004431 | 11 IFI27L2  |
| CETN2     | 2,39E-07 | 0,531871 | 0,897 | 0,891 | 0,004563 | 11 CETN2    |
| TCEAL41   | 2,41E-07 | 0,646636 | 0,974 | 0,988 | 0,004608 | 11 TCEAL4   |
| AKR1B12   | 2,58E-07 | 0,473241 | 1     | 0,978 | 0,004936 | 11 AKR1B1   |
| MDH11     | 2,61E-07 | 0,50196  | 0,897 | 0,922 | 0,004994 | 11 MDH1     |
| ATP6V1E11 | 2,68E-07 | 0,645872 | 0,923 | 0,977 | 0,005117 | 11 ATP6V1E1 |
| RPLP0     | 2,71E-07 | 0,293625 | 1     | 1     | 0,005189 | 11 RPLP0    |
| RPS24     | 2,85E-07 | 0,337438 | 1     | 1     | 0,005453 | 11 RPS24    |
| NDUFC23   | 2,94E-07 | 0,536684 | 0,923 | 0,986 | 0,005627 | 11 NDUFC2   |
| PSMA41    | 3,04E-07 | 0,697847 | 1     | 0,989 | 0,005808 | 11 PSMA4    |
| NOP101    | 3,07E-07 | 0,490831 | 1     | 0,995 | 0,00587  | 11 NOP10    |
| NDUFAB12  | 3,13E-07 | 0,642654 | 0,872 | 0,936 | 0,005989 | 11 NDUFAB1  |
| TRAPPC2L1 | 3,16E-07 | 0,520254 | 0,974 | 0,973 | 0,006045 | 11 TRAPPC2L |
| EIF63     | 3,23E-07 | 0,434205 | 0,949 | 0,965 | 0,006173 | 11 EIF6     |
| RPL37A    | 3,29E-07 | 0,258683 | 1     | 1     | 0,006294 | 11 RPL37A   |
| RPL391    | 3,30E-07 | 0,302811 | 1     | 1     | 0,006313 | 11 RPL39    |

|          |          |          |       |       |          |             |
|----------|----------|----------|-------|-------|----------|-------------|
| MRPS21   | 3,37E-07 | 0,509702 | 0,949 | 0,994 | 0,006436 | 11 MRPS21   |
| PSMC33   | 3,53E-07 | 0,578146 | 0,872 | 0,926 | 0,006749 | 11 PSMC3    |
| VPS291   | 3,68E-07 | 0,516191 | 0,949 | 0,96  | 0,007031 | 11 VPS29    |
| VDAC2    | 4,07E-07 | 0,455665 | 0,974 | 0,996 | 0,007778 | 11 VDAC2    |
| UFM1     | 4,08E-07 | 0,534757 | 0,872 | 0,918 | 0,007793 | 11 UFM1     |
| HNRNPA12 | 4,36E-07 | 0,729866 | 0,974 | 0,999 | 0,00833  | 11 HNRNPA1  |
| RPL23A   | 4,40E-07 | 0,272411 | 1     | 1     | 0,008422 | 11 RPL23A   |
| STX8     | 5,17E-07 | 0,525857 | 0,769 | 0,765 | 0,009877 | 11 STX8     |
| DCXR     | 5,45E-07 | 0,596149 | 0,846 | 0,861 | 0,010417 | 11 DCXR     |
| RBM3     | 6,03E-07 | 0,408835 | 1     | 0,999 | 0,011538 | 11 RBM3     |
| CCT81    | 6,72E-07 | 0,52099  | 0,949 | 0,994 | 0,012857 | 11 CCT8     |
| TRMT1121 | 6,76E-07 | 0,476437 | 0,949 | 0,994 | 0,012924 | 11 TRMT112  |
| COX7C    | 6,84E-07 | 0,3467   | 1     | 0,999 | 0,013077 | 11 COX7C    |
| SEC61B   | 6,97E-07 | 0,345074 | 1     | 0,998 | 0,013333 | 11 SEC61B   |
| UQCRB1   | 7,41E-07 | 0,467893 | 1     | 1     | 0,01416  | 11 UQCRB    |
| NDUFB1   | 7,53E-07 | 0,486748 | 0,949 | 0,992 | 0,014395 | 11 NDUFB1   |
| REXO22   | 8,03E-07 | 0,457596 | 1     | 0,994 | 0,015358 | 11 REXO2    |
| AP1S11   | 8,59E-07 | 0,439765 | 0,923 | 0,956 | 0,016418 | 11 AP1S1    |
| SNU133   | 8,64E-07 | 0,559305 | 1     | 0,995 | 0,016529 | 11 SNU13    |
| RPL36    | 8,71E-07 | 0,282804 | 1     | 1     | 0,016653 | 11 RPL36    |
| C19orf70 | 8,72E-07 | 0,464253 | 1     | 0,988 | 0,016684 | 11 C19orf70 |
| XRCC53   | 9,04E-07 | 0,524336 | 0,949 | 0,938 | 0,017284 | 11 XRCC5    |
| RPS17    | 9,09E-07 | 0,258648 | 1     | 1     | 0,017376 | 11 RPS17    |
| SUMO1    | 9,42E-07 | 0,385182 | 1     | 0,996 | 0,018011 | 11 SUMO1    |
| SAP181   | 9,52E-07 | 0,488142 | 0,974 | 0,994 | 0,018205 | 11 SAP18    |
| HSP90AA1 | 9,73E-07 | 0,825737 | 1     | 0,999 | 0,018608 | 11 HSP90AA1 |
| PAICS2   | 1,06E-06 | 0,534861 | 0,718 | 0,64  | 0,02029  | 11 PAICS    |
| DAP      | 1,07E-06 | 0,581067 | 0,897 | 0,936 | 0,020407 | 11 DAP      |
| IFITM31  | 1,08E-06 | 0,395362 | 1     | 1     | 0,020657 | 11 IFITM3   |
| NAA38    | 1,10E-06 | 0,485829 | 0,923 | 0,971 | 0,020949 | 11 NAA38    |
| CENPH1   | 1,18E-06 | 0,434912 | 0,462 | 0,221 | 0,022651 | 11 CENPH    |
| UFD1L2   | 1,26E-06 | 0,583712 | 0,821 | 0,858 | 0,024063 | 11 UFD1L    |
| PA2G43   | 1,36E-06 | 0,747567 | 0,897 | 0,929 | 0,026095 | 11 PA2G4    |
| CACYBP3  | 1,46E-06 | 0,506535 | 0,846 | 0,814 | 0,027995 | 11 CACYBP   |
| C1QBP2   | 1,70E-06 | 0,58063  | 0,872 | 0,964 | 0,032448 | 11 C1QBP    |
| RPL14    | 1,94E-06 | 0,308224 | 1     | 1     | 0,037109 | 11 RPL14    |
| CHMP51   | 2,01E-06 | 0,482702 | 0,923 | 0,948 | 0,038342 | 11 CHMP5    |
| PRDX31   | 2,07E-06 | 0,609833 | 0,821 | 0,926 | 0,039572 | 11 PRDX3    |
| XRCC63   | 2,26E-06 | 0,509448 | 0,897 | 0,934 | 0,043297 | 11 XRCC6    |
| SNX6     | 2,43E-06 | 0,446144 | 0,897 | 0,938 | 0,046388 | 11 SNX6     |
| SNX3     | 2,50E-06 | 0,41656  | 1     | 0,998 | 0,047747 | 11 SNX3     |
| ANXA61   | 2,99E-06 | 0,499679 | 0,923 | 0,98  | 0,057244 | 11 ANXA6    |
| RSU11    | 3,01E-06 | 0,460429 | 0,846 | 0,905 | 0,057541 | 11 RSU1     |
| PDCD53   | 3,44E-06 | 0,54711  | 1     | 0,989 | 0,065787 | 11 PDCD5    |
| POLR2E2  | 3,52E-06 | 0,426007 | 0,949 | 0,974 | 0,067218 | 11 POLR2E   |
| GSTM31   | 4,24E-06 | 0,560246 | 0,974 | 0,965 | 0,08101  | 11 GSTM3    |
| RPL22L14 | 4,50E-06 | 0,922889 | 0,897 | 0,974 | 0,086047 | 11 RPL22L1  |
| RPSA1    | 4,75E-06 | 0,302399 | 1     | 1     | 0,090902 | 11 RPSA     |
| RTFDC1   | 4,76E-06 | 0,621859 | 0,872 | 0,942 | 0,090976 | 11 RTFDC1   |
| ADI11    | 4,90E-06 | 0,536272 | 0,897 | 0,931 | 0,093631 | 11 ADI1     |

|          |          |          |       |       |          |             |
|----------|----------|----------|-------|-------|----------|-------------|
| RPL17    | 5,16E-06 | 0,341625 | 1     | 0,992 | 0,09867  | 11 RPL17    |
| SELT     | 5,52E-06 | 0,525814 | 0,872 | 0,953 | 0,105606 | 11 SELT     |
| ATP5G34  | 5,62E-06 | 0,486446 | 1     | 0,997 | 0,107399 | 11 ATP5G3   |
| RPS211   | 5,85E-06 | 0,353132 | 1     | 1     | 0,111914 | 11 RPS21    |
| YWHAE2   | 6,22E-06 | 0,396928 | 1     | 0,996 | 0,119003 | 11 YWHAE    |
| SDHC1    | 6,24E-06 | 0,373065 | 0,949 | 0,985 | 0,119359 | 11 SDHC     |
| DAD12    | 6,73E-06 | 0,532151 | 1     | 0,991 | 0,128719 | 11 DAD1     |
| PRMT13   | 7,27E-06 | 0,490183 | 0,821 | 0,89  | 0,138975 | 11 PRMT1    |
| MGST12   | 7,44E-06 | 0,53438  | 1     | 1     | 0,142331 | 11 MGST1    |
| SF3B61   | 7,65E-06 | 0,459736 | 0,974 | 0,991 | 0,146224 | 11 SF3B6    |
| EIF1AY   | 7,86E-06 | 0,473702 | 0,795 | 0,827 | 0,150253 | 11 EIF1AY   |
| BLOC1S1  | 7,88E-06 | 0,384589 | 0,974 | 0,989 | 0,150668 | 11 BLOC1S1  |
| UBE2A    | 7,89E-06 | 0,45503  | 0,923 | 0,914 | 0,15078  | 11 UBE2A    |
| TPM41    | 8,03E-06 | 0,362206 | 1     | 1     | 0,153531 | 11 TPM4     |
| DYNLT3   | 8,92E-06 | 0,617201 | 0,744 | 0,794 | 0,170629 | 11 DYNLT3   |
| GTF3C62  | 1,00E-05 | 0,610232 | 0,846 | 0,944 | 0,191556 | 11 GTF3C6   |
| ATP5O1   | 1,00E-05 | 0,39801  | 1     | 0,995 | 0,191757 | 11 ATP5O    |
| NDUFB7   | 1,05E-05 | 0,334407 | 0,974 | 0,996 | 0,200203 | 11 NDUFB7   |
| BZW13    | 1,06E-05 | 0,552249 | 0,897 | 0,966 | 0,201814 | 11 BZW1     |
| DPY30    | 1,07E-05 | 0,542232 | 0,846 | 0,875 | 0,204299 | 11 DPY30    |
| PSMC42   | 1,11E-05 | 0,493715 | 0,795 | 0,773 | 0,212659 | 11 PSMC4    |
| NHP23    | 1,27E-05 | 0,511471 | 0,949 | 0,968 | 0,242928 | 11 NHP2     |
| COX172   | 1,39E-05 | 0,593448 | 0,821 | 0,893 | 0,264977 | 11 COX17    |
| COX5A    | 1,45E-05 | 0,438372 | 0,974 | 0,994 | 0,276565 | 11 COX5A    |
| RPL26    | 1,58E-05 | 0,279024 | 1     | 1     | 0,302636 | 11 RPL26    |
| ADK      | 1,61E-05 | 0,617165 | 0,667 | 0,61  | 0,307036 | 11 ADK      |
| ILF23    | 1,96E-05 | 0,466225 | 0,846 | 0,862 | 0,374767 | 11 ILF2     |
| TMEM167A | 2,00E-05 | 0,466099 | 0,897 | 0,962 | 0,381901 | 11 TMEM167A |
| H2AFZ2   | 2,01E-05 | 1,407186 | 0,974 | 0,998 | 0,383681 | 11 H2AFZ    |
| APRT     | 2,05E-05 | 0,424813 | 1     | 0,997 | 0,391296 | 11 APRT     |
| UQCC22   | 2,25E-05 | 0,426666 | 0,897 | 0,951 | 0,429849 | 11 UQCC2    |
| SRM3     | 2,29E-05 | 0,522277 | 0,949 | 0,968 | 0,437464 | 11 SRM      |
| COX4I11  | 2,39E-05 | 0,323846 | 1     | 1     | 0,456129 | 11 COX4I1   |
| PIN12    | 2,42E-05 | 0,426566 | 0,897 | 0,966 | 0,462659 | 11 PIN1     |
| SKA22    | 2,53E-05 | 0,446004 | 0,795 | 0,846 | 0,482915 | 11 SKA2     |
| SNRPE2   | 2,65E-05 | 0,470295 | 0,974 | 0,993 | 0,507418 | 11 SNRPE    |
| CIB1     | 2,97E-05 | 0,393329 | 0,974 | 0,972 | 0,567009 | 11 CIB1     |
| C14orf2  | 2,99E-05 | 0,319781 | 1     | 0,999 | 0,57101  | 11 C14orf2  |
| CDC373   | 3,25E-05 | 0,679616 | 0,821 | 0,97  | 0,621729 | 11 CDC37    |
| PSME11   | 3,27E-05 | 0,446929 | 0,974 | 0,987 | 0,624396 | 11 PSME1    |
| TMEM230  | 3,34E-05 | 0,434748 | 1     | 0,985 | 0,638526 | 11 TMEM230  |
| PRR131   | 3,65E-05 | 0,458226 | 0,974 | 0,979 | 0,697858 | 11 PRR13    |
| SPA17    | 3,69E-05 | 0,352562 | 0,513 | 0,333 | 0,704885 | 11 SPA17    |
| CLTA1    | 3,83E-05 | 0,354235 | 1     | 1     | 0,732864 | 11 CLTA     |
| DEF8     | 3,97E-05 | 0,311134 | 0,897 | 0,927 | 0,759853 | 11 DEF8     |
| MTCH1    | 4,04E-05 | 0,475065 | 0,897 | 0,978 | 0,771826 | 11 MTCH1    |
| PTTG12   | 4,13E-05 | 1,537113 | 0,564 | 0,418 | 0,789802 | 11 PTTG1    |
| PRKCDBP2 | 4,40E-05 | 0,454297 | 0,974 | 0,995 | 0,842297 | 11 PRKCDBP  |
| CYB5B    | 4,45E-05 | 0,538219 | 0,821 | 0,9   | 0,851315 | 11 CYB5B    |
| AK21     | 4,60E-05 | 0,332549 | 0,795 | 0,816 | 0,879323 | 11 AK2      |

|           |          |          |       |       |          |    |          |
|-----------|----------|----------|-------|-------|----------|----|----------|
| NDUFAF31  | 4,75E-05 | 0,506097 | 0,949 | 0,981 | 0,908296 | 11 | NDUFAF3  |
| MCTS11    | 4,85E-05 | 0,521433 | 0,872 | 0,912 | 0,926924 | 11 | MCTS1    |
| ATP6V1F   | 4,92E-05 | 0,455103 | 1     | 0,997 | 0,941713 | 11 | ATP6V1F  |
| SBDS1     | 5,34E-05 | 0,454201 | 0,923 | 0,969 | 1        | 11 | SBDS     |
| LMNA4     | 5,73E-05 | 0,576939 | 0,974 | 0,999 | 1        | 11 | LMNA     |
| PFDN1     | 6,03E-05 | 0,480355 | 0,769 | 0,827 | 1        | 11 | PFDN1    |
| CSTB      | 6,60E-05 | 0,348683 | 1     | 0,998 | 1        | 11 | CSTB     |
| ZBTB8OS   | 7,18E-05 | 0,575439 | 0,718 | 0,818 | 1        | 11 | ZBTB8OS  |
| PEA151    | 7,39E-05 | 0,516652 | 0,846 | 0,907 | 1        | 11 | PEA15    |
| PTMS2     | 7,56E-05 | 0,393748 | 0,974 | 0,998 | 1        | 11 | PTMS     |
| CEBPZOS   | 8,02E-05 | 0,388051 | 0,744 | 0,79  | 1        | 11 | CEBPZOS  |
| PPDPF1    | 8,44E-05 | 0,326153 | 1     | 0,999 | 1        | 11 | PPDPF    |
| MORF4L11  | 9,11E-05 | 0,436974 | 1     | 0,998 | 1        | 11 | MORF4L1  |
| FARSB     | 9,52E-05 | 0,314364 | 0,538 | 0,385 | 1        | 11 | FARSB    |
| ETHE1     | 0,000105 | 0,378234 | 0,974 | 0,981 | 1        | 11 | ETHE1    |
| TMEM261   | 0,000106 | 0,433871 | 0,923 | 0,927 | 1        | 11 | TMEM261  |
| CDKN32    | 0,000112 | 0,696808 | 0,513 | 0,342 | 1        | 11 | CDKN3    |
| COMMD42   | 0,000112 | 0,412158 | 0,846 | 0,917 | 1        | 11 | COMMD4   |
| RALB      | 0,000121 | 0,286647 | 0,667 | 0,613 | 1        | 11 | RALB     |
| DTD11     | 0,00013  | 0,352589 | 0,769 | 0,805 | 1        | 11 | DTD1     |
| TYMS2     | 0,000131 | 0,919245 | 0,487 | 0,326 | 1        | 11 | TYMS     |
| H2AFJ     | 0,000134 | 0,410795 | 0,974 | 0,992 | 1        | 11 | H2AFJ    |
| NDUFB91   | 0,000142 | 0,408247 | 1     | 0,991 | 1        | 11 | NDUFB9   |
| HPRT11    | 0,000143 | 0,431284 | 0,641 | 0,574 | 1        | 11 | HPRT1    |
| OAZ1      | 0,000144 | 0,261179 | 1     | 1     | 1        | 11 | OAZ1     |
| MRPL241   | 0,000147 | 0,490429 | 0,692 | 0,71  | 1        | 11 | MRPL24   |
| OST42     | 0,000151 | 0,288874 | 1     | 1     | 1        | 11 | OST4     |
| RNF7      | 0,000153 | 0,32482  | 0,974 | 0,991 | 1        | 11 | RNF7     |
| VDAC33    | 0,000154 | 0,486208 | 0,872 | 0,92  | 1        | 11 | VDAC3    |
| NUCB22    | 0,000158 | 0,371275 | 0,872 | 0,917 | 1        | 11 | NUCB2    |
| IL33      | 0,000159 | 0,656872 | 0,487 | 0,31  | 1        | 11 | IL33     |
| NDUFB11   | 0,000161 | 0,381632 | 0,949 | 0,989 | 1        | 11 | NDUFB11  |
| CAMTA1    | 0,000168 | 0,360787 | 0,923 | 0,955 | 1        | 11 | CAMTA1   |
| GDI2      | 0,000173 | 0,433843 | 0,846 | 0,979 | 1        | 11 | GDI2     |
| NSA2      | 0,000178 | 0,376719 | 0,923 | 0,982 | 1        | 11 | NSA2     |
| C17orf893 | 0,000194 | 0,311525 | 0,974 | 0,987 | 1        | 11 | C17orf89 |
| PLIN33    | 0,000203 | 0,404586 | 0,872 | 0,93  | 1        | 11 | PLIN3    |
| PSMC53    | 0,000203 | 0,388301 | 0,923 | 0,943 | 1        | 11 | PSMC5    |
| ENY21     | 0,000207 | 0,38099  | 0,949 | 0,985 | 1        | 11 | ENY2     |
| PSMA32    | 0,000214 | 0,393691 | 0,897 | 0,963 | 1        | 11 | PSMA3    |
| HMGB12    | 0,000227 | 1,011404 | 0,974 | 0,997 | 1        | 11 | HMGB1    |
| CISD11    | 0,000236 | 0,435735 | 0,949 | 0,972 | 1        | 11 | CISD1    |
| ASNA1     | 0,000254 | 0,299999 | 0,872 | 0,936 | 1        | 11 | ASNA1    |
| FKBP8     | 0,000258 | 0,289693 | 0,974 | 0,991 | 1        | 11 | FKBP8    |
| NAA10     | 0,000268 | 0,346548 | 0,897 | 0,979 | 1        | 11 | NAA10    |
| BCCIP     | 0,000269 | 0,304278 | 0,615 | 0,545 | 1        | 11 | BCCIP    |
| DECR11    | 0,00028  | 0,482972 | 0,872 | 0,925 | 1        | 11 | DECR1    |
| FAM127A   | 0,00028  | 0,384197 | 1     | 0,995 | 1        | 11 | FAM127A  |
| PSMC12    | 0,000294 | 0,577284 | 0,769 | 0,897 | 1        | 11 | PSMC1    |
| LSM52     | 0,000297 | 0,644169 | 0,821 | 0,945 | 1        | 11 | LSM5     |



|           |          |          |       |       |   |               |
|-----------|----------|----------|-------|-------|---|---------------|
| CD592     | 0,0003   | 0,596215 | 0,949 | 0,998 | 1 | 11 CD59       |
| TFPI21    | 0,000317 | 0,834067 | 0,897 | 0,938 | 1 | 11 TFPI2      |
| LDHA4     | 0,000321 | 0,656022 | 0,949 | 0,994 | 1 | 11 LDHA       |
| FABP4     | 0,000321 | 0,273599 | 0,359 | 0,184 | 1 | 11 FABP4      |
| SMDT1     | 0,00033  | 0,344616 | 0,923 | 0,954 | 1 | 11 SMDT1      |
| DDT       | 0,000336 | 0,416843 | 0,949 | 0,994 | 1 | 11 DDT        |
| GHITM1    | 0,00035  | 0,42027  | 0,872 | 0,982 | 1 | 11 GHITM      |
| SUMO32    | 0,000354 | 0,437012 | 0,897 | 0,955 | 1 | 11 SUMO3      |
| CKS1B2    | 0,000366 | 1,016676 | 0,59  | 0,534 | 1 | 11 CKS1B      |
| PFDN22    | 0,000366 | 0,507209 | 0,821 | 0,947 | 1 | 11 PFDN2      |
| NFU1      | 0,00037  | 0,337381 | 0,769 | 0,824 | 1 | 11 NFU1       |
| AK1       | 0,000375 | 0,38398  | 0,846 | 0,906 | 1 | 11 AK1        |
| POLR2F2   | 0,000389 | 0,440386 | 0,897 | 0,974 | 1 | 11 POLR2F     |
| LAMTOR5   | 0,00039  | 0,333866 | 1     | 0,995 | 1 | 11 LAMTOR5    |
| HSPB62    | 0,000418 | 0,841237 | 0,769 | 0,847 | 1 | 11 HSPB6      |
| NDUFA3    | 0,000429 | 0,299896 | 0,897 | 0,956 | 1 | 11 NDUFA3     |
| MRPS101   | 0,000435 | 0,365997 | 0,769 | 0,847 | 1 | 11 MRPS10     |
| DDA11     | 0,000445 | 0,419717 | 0,872 | 0,9   | 1 | 11 DDA1       |
| MRPL402   | 0,000505 | 0,391469 | 0,821 | 0,9   | 1 | 11 MRPL40     |
| C20orf272 | 0,000528 | 0,344847 | 0,744 | 0,8   | 1 | 11 C20orf27   |
| POLR2I    | 0,000532 | 0,275927 | 0,846 | 0,953 | 1 | 11 POLR2I     |
| VTI1B     | 0,000562 | 0,316056 | 0,949 | 0,957 | 1 | 11 VTI1B      |
| RPL26L12  | 0,000579 | 0,302239 | 0,821 | 0,945 | 1 | 11 RPL26L1    |
| RAB11A1   | 0,000589 | 0,398672 | 0,897 | 0,961 | 1 | 11 RAB11A     |
| LAMTOR2   | 0,000612 | 0,304054 | 0,897 | 0,956 | 1 | 11 LAMTOR2    |
| ANAPC13   | 0,000625 | 0,426032 | 0,795 | 0,934 | 1 | 11 ANAPC13    |
| NDUFS81   | 0,000678 | 0,285598 | 0,974 | 0,988 | 1 | 11 NDUFS8     |
| FXYD51    | 0,000679 | 0,426162 | 0,846 | 0,984 | 1 | 11 FXYD5      |
| TAX1BP3   | 0,000714 | 0,333834 | 0,897 | 0,99  | 1 | 11 TAX1BP3    |
| CNN11     | 0,000769 | 0,69491  | 0,692 | 0,703 | 1 | 11 CNN1       |
| ATP5D     | 0,000776 | 0,2894   | 1     | 0,998 | 1 | 11 ATP5D      |
| NDUFA123  | 0,000789 | 0,437243 | 0,821 | 0,929 | 1 | 11 NDUFA12    |
| ST131     | 0,000814 | 0,277113 | 0,974 | 0,999 | 1 | 11 ST13       |
| ERH2      | 0,00086  | 0,376062 | 0,949 | 0,995 | 1 | 11 ERH        |
| PSMB13    | 0,000896 | 0,323809 | 1     | 0,995 | 1 | 11 PSMB1      |
| SSB1      | 0,000897 | 0,343778 | 0,923 | 0,966 | 1 | 11 SSB        |
| PDZD11    | 0,000902 | 0,284318 | 0,821 | 0,861 | 1 | 11 PDZD11     |
| IDH3G1    | 0,000977 | 0,348259 | 0,795 | 0,837 | 1 | 11 IDH3G      |
| PSMD42    | 0,000987 | 0,481837 | 0,872 | 0,957 | 1 | 11 PSMD4      |
| TCP13     | 0,001027 | 0,390227 | 0,821 | 0,938 | 1 | 11 TCP1       |
| SH3BGRL1  | 0,001028 | 0,327481 | 1     | 0,975 | 1 | 11 SH3BGRL    |
| UFC1      | 0,001089 | 0,339901 | 0,949 | 0,979 | 1 | 11 UFC1       |
| CCT23     | 0,001154 | 0,467947 | 0,795 | 0,906 | 1 | 11 CCT2       |
| NDUFA82   | 0,00119  | 0,315414 | 0,897 | 0,936 | 1 | 11 NDUFA8     |
| PRDX51    | 0,001231 | 0,273343 | 1     | 0,999 | 1 | 11 PRDX5      |
| SUCLG11   | 0,001319 | 0,302652 | 0,795 | 0,899 | 1 | 11 SUCLG1     |
| CSNK2B    | 0,001329 | 0,276166 | 0,923 | 0,989 | 1 | 11 CSNK2B     |
| CCT53     | 0,001332 | 0,473877 | 0,821 | 0,88  | 1 | 11 CCT5       |
| GADD45GII | 0,001373 | 0,365433 | 0,974 | 0,994 | 1 | 11 GADD45GIP1 |
| NDUFA10   | 0,001382 | 0,285784 | 0,897 | 0,951 | 1 | 11 NDUFA10    |

|            |          |          |       |       |   |               |
|------------|----------|----------|-------|-------|---|---------------|
| TPMT       | 0,001395 | 0,256476 | 0,487 | 0,374 | 1 | 11 TPMT       |
| MRPL132    | 0,001401 | 0,377855 | 0,769 | 0,885 | 1 | 11 MRPL13     |
| HMGB32     | 0,00144  | 0,415609 | 0,564 | 0,501 | 1 | 11 HMGB3      |
| PSIP11     | 0,001467 | 0,375981 | 0,692 | 0,746 | 1 | 11 PSIP1      |
| EMP33      | 0,00147  | 0,395712 | 0,974 | 0,999 | 1 | 11 EMP3       |
| ACP1       | 0,001473 | 0,274839 | 0,923 | 0,978 | 1 | 11 ACP1       |
| HNRNPA2B   | 0,001513 | 0,539977 | 0,872 | 0,995 | 1 | 11 HNRNPA2B1  |
| CAPG1      | 0,001569 | 0,363087 | 0,667 | 0,692 | 1 | 11 CAPG       |
| SNRPD31    | 0,001586 | 0,331134 | 0,872 | 0,939 | 1 | 11 SNRPD3     |
| RPL36A     | 0,001596 | 0,35881  | 1     | 0,995 | 1 | 11 RPL36A     |
| SEC132     | 0,001624 | 0,417531 | 0,821 | 0,928 | 1 | 11 SEC13      |
| FKBP22     | 0,001631 | 0,328811 | 0,923 | 0,987 | 1 | 11 FKBP2      |
| RAB5C      | 0,001728 | 0,379137 | 0,897 | 0,979 | 1 | 11 RAB5C      |
| COPS8      | 0,001843 | 0,444777 | 0,744 | 0,836 | 1 | 11 COPS8      |
| MPC23      | 0,001901 | 0,373207 | 0,949 | 0,988 | 1 | 11 MPC2       |
| TTC1       | 0,001965 | 0,310741 | 0,795 | 0,832 | 1 | 11 TTC1       |
| ARPC1B2    | 0,001992 | 0,308211 | 0,974 | 0,996 | 1 | 11 ARPC1B     |
| SDCBP2     | 0,002151 | 0,338294 | 0,872 | 0,988 | 1 | 11 SDCBP      |
| ARF12      | 0,002164 | 0,405407 | 0,949 | 0,991 | 1 | 11 ARF1       |
| CHCHD10    | 0,002246 | 0,42082  | 0,821 | 0,856 | 1 | 11 CHCHD10    |
| TIMP12     | 0,00231  | 0,729799 | 1     | 1     | 1 | 11 TIMP1      |
| ACADVL1    | 0,002317 | 0,310309 | 0,718 | 0,738 | 1 | 11 ACADVL     |
| TPD52L2    | 0,002317 | 0,32727  | 0,744 | 0,896 | 1 | 11 TPD52L2    |
| TUBA1B3    | 0,002325 | 1,149052 | 0,974 | 0,995 | 1 | 11 TUBA1B     |
| ANXA71     | 0,00236  | 0,370053 | 0,795 | 0,882 | 1 | 11 ANXA7      |
| ZNHIT1     | 0,002462 | 0,283038 | 0,923 | 0,992 | 1 | 11 ZNHIT1     |
| NDUFS4     | 0,002464 | 0,323427 | 0,923 | 0,983 | 1 | 11 NDUFS4     |
| C16orf131  | 0,002599 | 0,297595 | 0,897 | 0,957 | 1 | 11 C16orf13   |
| LINC00998  | 0,002603 | 0,322666 | 0,897 | 0,946 | 1 | 11 LINC00998  |
| TUBB3      | 0,002622 | 0,455472 | 0,974 | 0,999 | 1 | 11 TUBB       |
| MRPL471    | 0,00268  | 0,301606 | 0,821 | 0,882 | 1 | 11 MRPL47     |
| CDKN2AIPNL | 0,002708 | 0,424891 | 0,564 | 0,532 | 1 | 11 CDKN2AIPNL |
| DNAJC15    | 0,002749 | 0,377705 | 0,769 | 0,877 | 1 | 11 DNAJC15    |
| CCT32      | 0,002756 | 0,287685 | 0,923 | 0,974 | 1 | 11 CCT3       |
| MRPL421    | 0,002759 | 0,305331 | 0,718 | 0,802 | 1 | 11 MRPL42     |
| CCDC1241   | 0,002772 | 0,330644 | 0,769 | 0,905 | 1 | 11 CCDC124    |
| POLE42     | 0,003022 | 0,38319  | 0,923 | 0,976 | 1 | 11 POLE4      |
| MAPRE11    | 0,003026 | 0,402098 | 0,692 | 0,822 | 1 | 11 MAPRE1     |
| RNASEH2A   | 0,003048 | 0,336072 | 0,333 | 0,197 | 1 | 11 RNASEH2A   |
| METAP2     | 0,003073 | 0,432579 | 0,821 | 0,963 | 1 | 11 METAP2     |
| ARPC32     | 0,003087 | 0,342881 | 0,974 | 0,997 | 1 | 11 ARPC3      |
| TMEM256    | 0,003115 | 0,30796  | 0,846 | 0,909 | 1 | 11 TMEM256    |
| H2AFV2     | 0,003191 | 0,286381 | 0,872 | 0,936 | 1 | 11 H2AFV      |
| ZWINT1     | 0,00327  | 0,359058 | 0,282 | 0,148 | 1 | 11 ZWINT      |
| NANS4      | 0,00336  | 0,287797 | 0,821 | 0,851 | 1 | 11 NANS       |
| TSR2       | 0,003423 | 0,439454 | 0,564 | 0,594 | 1 | 11 TSR2       |
| COMMD1     | 0,003454 | 0,261164 | 0,769 | 0,848 | 1 | 11 COMMD1     |
| CCND21     | 0,003493 | 0,510622 | 0,667 | 0,627 | 1 | 11 CCND2      |
| RAB3B1     | 0,003518 | 0,338854 | 0,667 | 0,683 | 1 | 11 RAB3B      |
| RAB132     | 0,003585 | 0,801042 | 0,974 | 0,996 | 1 | 11 RAB13      |

|          |          |          |       |       |   |            |
|----------|----------|----------|-------|-------|---|------------|
| OSTF1    | 0,003695 | 0,369259 | 0,59  | 0,638 | 1 | 11 OSTF1   |
| TIMM13   | 0,003718 | 0,269077 | 0,974 | 0,992 | 1 | 11 TIMM13  |
| BOLA33   | 0,003781 | 0,413697 | 0,821 | 0,874 | 1 | 11 BOLA3   |
| PLP22    | 0,004001 | 0,432823 | 0,846 | 0,939 | 1 | 11 PLP2    |
| PSMB23   | 0,004027 | 0,336028 | 0,923 | 0,975 | 1 | 11 PSMB2   |
| NCBP2    | 0,00408  | 0,282687 | 0,769 | 0,848 | 1 | 11 NCBP2   |
| NDUFA91  | 0,004096 | 0,272779 | 0,744 | 0,789 | 1 | 11 NDUFA9  |
| PTS2     | 0,00413  | 0,320972 | 0,846 | 0,905 | 1 | 11 PTS     |
| OCIAD2   | 0,004186 | 0,377778 | 0,769 | 0,807 | 1 | 11 OCIAD2  |
| CAPZA11  | 0,004255 | 0,342589 | 0,846 | 0,961 | 1 | 11 CAPZA1  |
| PTGES32  | 0,004361 | 0,538321 | 0,949 | 0,985 | 1 | 11 PTGES3  |
| NDUFB5   | 0,004562 | 0,283934 | 0,846 | 0,981 | 1 | 11 NDUFB5  |
| DUT2     | 0,004587 | 0,330855 | 0,821 | 0,928 | 1 | 11 DUT     |
| CENPW2   | 0,004595 | 0,490617 | 0,462 | 0,374 | 1 | 11 CENPW   |
| STRAP1   | 0,00468  | 0,283279 | 0,923 | 0,982 | 1 | 11 STRAP   |
| ANAPC152 | 0,004832 | 0,296133 | 0,821 | 0,894 | 1 | 11 ANAPC15 |
| SAE11    | 0,004932 | 0,427969 | 0,641 | 0,734 | 1 | 11 SAE1    |
| EEF1E12  | 0,005093 | 0,378901 | 0,641 | 0,64  | 1 | 11 EEF1E1  |
| CCT42    | 0,005306 | 0,414576 | 0,821 | 0,948 | 1 | 11 CCT4    |
| KXD11    | 0,005521 | 0,262374 | 0,795 | 0,923 | 1 | 11 KXD1    |
| NUDT12   | 0,005548 | 0,426655 | 0,59  | 0,64  | 1 | 11 NUDT1   |
| CAV13    | 0,005568 | 0,451783 | 1     | 0,999 | 1 | 11 CAV1    |
| CNIH1    | 0,005694 | 0,290616 | 0,897 | 0,972 | 1 | 11 CNIH1   |
| SPCS12   | 0,005776 | 0,26061  | 0,974 | 0,99  | 1 | 11 SPCS1   |
| MVP1     | 0,005922 | 0,288239 | 0,872 | 0,95  | 1 | 11 MVP     |
| TXN2     | 0,005937 | 0,288637 | 0,897 | 0,963 | 1 | 11 TXN2    |
| FDPS2    | 0,006152 | 0,261058 | 0,949 | 0,977 | 1 | 11 FDPS    |
| HSPB112  | 0,0063   | 0,410476 | 0,795 | 0,901 | 1 | 11 HSPB11  |
| CLIC4    | 0,006673 | 0,269753 | 0,923 | 0,977 | 1 | 11 CLIC4   |
| PABPC4   | 0,006945 | 0,302941 | 0,923 | 0,943 | 1 | 11 PABPC4  |
| ARHGDI2  | 0,006977 | 0,337309 | 0,949 | 0,976 | 1 | 11 ARHGDI2 |
| PET100   | 0,007147 | 0,291928 | 0,692 | 0,844 | 1 | 11 PET100  |
| ARL31    | 0,007257 | 0,258126 | 0,821 | 0,883 | 1 | 11 ARL3    |
| MT1E4    | 0,007329 | 0,664723 | 0,872 | 0,964 | 1 | 11 MT1E    |
| NUCKS11  | 0,007817 | 0,387825 | 0,897 | 0,995 | 1 | 11 NUCKS1  |
| CINP     | 0,008719 | 0,317206 | 0,692 | 0,791 | 1 | 11 CINP    |
| MRPS33   | 0,009223 | 0,280284 | 0,846 | 0,964 | 1 | 11 MRPS33  |
| GLTP     | 0,009898 | 0,307195 | 0,641 | 0,713 | 1 | 11 GLTP    |

**Table S4. Top 30 expressed genes in each CAF subtype for bulk RNA seq CAF classification in TCGA**

| <b>c1-CAF</b> | <b>c2-CAF</b> | <b>c3-CAF</b> | <b>c4-CAF</b> | <b>c5-CAF</b> | <b>c6-CAF</b> | <b>c7-CAF</b> | <b>c8-CAF</b> |
|---------------|---------------|---------------|---------------|---------------|---------------|---------------|---------------|
| RGS5          | COL1A1        | CFD           | RGS5          | S100B         | RGS5          |               |               |
| TAGLN         | COL1A2        | DCN           | IGFBP7        | GPM6B         | ACTA2         |               |               |
| ACTA2         | COL3A1        | FBLN1         | SPARCL1       | CRYAB         | NDUFA4L2      |               |               |
| MYL9          | MMP11         | APOD          | COL4A1        | FXYD1         | TAGLN         |               |               |
| TPM2          | CTHRC1        | PTGDS         | NDUFA4        | LGI4          | CALD1         |               |               |
| NDUFA4        | SFRP2         | SFRP2         | SPRY1         | PLP1          | PDGFRB        |               |               |
| IGFBP7        | SPARC         | LUM           | C11orf96      | PMP22         | MYL9          |               |               |
| CALD1         | LUM           | MGP           | COL4A2        | NRXN1         | NOTCH3        |               |               |
| ADIRF         | AEBP1         | CCDC80        | CALD1         | CDH19         | TPM2          |               |               |
| MYH11         | COL6A3        | IGFBP6        | SLC9A3F       | TPPP3         | COL4A1        |               |               |
| PPP1R14       | POSTN         | C7            | PLVAP         | SCN7A         | SPARCL1       |               |               |
| C11orf96      | FN1           | SERPINF       | RAMP2         | ALDH1A1       | MAP1B         |               |               |
| SPARCL1       | COL6A2        | SFRP4         | INSR          | CD9           | LHFPL6        |               |               |
| PDGFRB        | BGN           | C1S           | FLT1          | SEMA3B        | PPP1R14A      |               |               |
| NOTCH3        | COL5A2        | C1R           | TIMP3         | TMEM17        | STEAP4        |               |               |
| SOD3          | COL6A1        | MFAP4         | SPARC         | CLU           | CRISPLD2      |               |               |
| BGN           | THBS2         | GSN           | TCF4          | MYOT          | COL4A2        |               |               |
| HIGD1B        | MMP2          | DPT           | GNG11         | SPARC         | HIGD1B        |               |               |
| IGFBP5        | COL5A1        | COL6A2        | HSPG2         | TMEM17        | ADAMTS1       |               |               |
| MYLK          | RARRES3       | C3            | STC1          | MIA           | BGN           |               |               |
| FRZB          | VCAN          | RARRES        | RGCC          | PRNP          | ADAMTS4       |               |               |
| MAP1B         | COL12A1       | <b>CYR61</b>  | PLPP1         | CNN3          | COX4I2        |               |               |
| MFGE8         | COL11A1       | MMP2          | CRIP2         | TUBA1A        | SYNPO2        |               |               |
| PLN           | CALD1         | COL1A2        | MYL9          | MATN2         | MYLK          |               |               |
| CSRP2         | COL10A1       | ADH1B         | CLDN5         | GPR155        | PLAC9         |               |               |
| DSTN          | SFRP4         | COL3A1        | HIGD1B        | AP1S2         | FRZB          |               |               |
| COL4A1        | TAGLN         | PLAC9         | VWF           | MPZ           | GJA4          |               |               |
| COL18A1       | CTSK          | IGFBP5        | PLPP3         | NDRG2         | CAVIN3        |               |               |
| COX4I2        | ASPN          | PCOLCE        | A2M           | MAL           | CD163         |               |               |
| TPM1          | CXCL14        | CTGF          | IGFBP3        | ABCA8         | MCAM          |               |               |
